# Supplementary material for: Cotranscriptional and Posttranscriptional Features of the Transcriptome in Soybean Shoot Apex and Leaf
Source: Front Plant Sci. 2021 Apr 9;12:649634. doi: 10.3389/fpls.2021.649634 (PMC8063115; doi:10.3389/fpls.2021.649634)
Supplement: Supplementary file 1 [file Data_Sheet_1.XLSX]

## Sheet: Table S1
Table S1. Public ChIP-seq data used in this study.
ChIP-seq data	NCBI Acc (SRA)
H3	SRR8742348
H3K27me3	SRR8742349
H3K36me3	SRR8742350
H3K56ac	SRR8742351
H3K4me3	SRR8742352
H3K4me1	SRR8742353
H2A.Z	SRR8742354

## Sheet: Table S2
Table S2. Gene's mean TPM and DEGs analysis results (log2FoldChange and padj were calculated by R package "DESeq2" by taking gene's read count in three replicates as input data)
Gene	CB_10D_apex_TPM	CB_15D_apex_TPM	CB_15D_leaf_TPM	log2FoldChange(CB_15Dleaf_vs_15Dapex)	padj(CB_15Dleaf_vs_15Dapex)	log2FoldChange(CB_15Dapex_vs_10Dapex)	padj(CB_15Dapex_vs_10Dapex)		polyA_10D_apex_TPM	polyA_15D_apex_TPM	polyA_15D_leaf_TPM	log2FoldChange(polyA_15Dleaf_vs_15Dapex)	padj(polyA_15Dleaf_vs_15Dapex)	log2FoldChange(polyA_15Dapex_vs_10Dapex)	padj(polyA_15Dapex_vs_10Dapex)
Glyma.01G000100	96.1425	88.1005	39.9206	-0.542239	0.00164617	-0.0942441	0.851807		15.5135	18.6624	5.47714	-0.877511	0.0019773	0.180124	0.819529
Glyma.01G000200	57.9256	52.0309	22.8397	-0.590851	8.73209e-06	-0.131576	0.679523		9.52411	11.8684	4.5337	-0.54826	0.126871	0.224447	0.841796
Glyma.01G000400	32.6438	31.6295	24.6056	0.242393	0.048401	-0.0202976	0.969085		12.4308	11.5372	6.34093	0.00292815	0.991924	-0.203327	0.625072
Glyma.01G000600	41.9011	46.977	63.0918	1.02971	1.13409e-22	0.187195	0.358502		5.71549	6.37885	6.67334	0.933946	8.16684e-06	0.0597996	0.953083
Glyma.01G000700	22.9359	26.35	19.8566	0.195457	0.0608362	0.222824	0.188884		3.17734	4.13146	0.663253	-1.62774	0.028395	0.277377	0.896093
Glyma.01G000800	109.853	142.987	91.6647	-0.0370099	0.842053	0.404517	0.130237		1.14745	1.57019	0.79817	-0.0614438	0.958151	0.367983	0.918813
Glyma.01G000900	25.1434	24.4027	18.1229	0.173813	0.120024	-0.0218416	0.960395		15.6812	15.8335	4.25728	-1.02161	1.03814e-08	-0.0852781	0.884498
Glyma.01G001000	16.557	17.3602	16.0402	0.499315	0.000200363	0.0863718	0.836553		28.2239	26.9905	12.6692	-0.219107	0.247229	-0.158983	0.739509
Glyma.01G001100	23.4453	27.1762	44.6464	1.32682	1.59093e-52	0.232474	0.100353		7.89321	9.39127	10.1791	0.967899	3.91438e-07	0.16831	0.781571
Glyma.01G001200	24.3219	19.9776	0.57882	-4.5036	2.08819e-36	-0.264709	0.451465		12.6503	11.4028	0.417814	-3.95608	1.75191e-27	-0.245366	0.472025
Glyma.01G001300	36.3225	29.896	28.0962	0.518196	9.24912e-07	-0.257618	0.121944		32.5609	30.4832	23.3425	0.472452	3.62717e-05	-0.189071	0.419391
Glyma.01G001600	19.2772	13.0281	4.77463	-0.855665	1.29484e-06	-0.542497	0.0175865		7.3676	5.95449	1.43482	-1.16305	5.04757e-07	-0.409132	0.19986
Glyma.01G001700	9.06077	8.01285	10.5437	0.99406	8.38441e-08	-0.14906	0.783495		8.88039	8.9785	9.62826	0.972957	1.54018e-07	-0.0950441	0.895236
Glyma.01G001800	0.985281	2.7283	0.301926	-2.56608	0.000512345	1.4968	0.123543		0.25974	0.574651	0.0514635	-2.62935	0.0412478	1.03784	0.610052
Glyma.01G002000	0.500665	0.123513	18.1893	7.74449	3.95917e-13	-1.89334	0.418691		0.852176	0.0599257	10.0311	8.03737	9.52713e-11	-3.72409	0.0648076
Glyma.01G002100	22.1899	26.0938	39.6109	1.20516	4.57165e-28	0.261105	0.180247		7.33085	7.89799	13.0361	1.57553	2.04861e-24	0.0147383	0.99548
Glyma.01G002200	36.0676	33.5914	39.4008	0.836198	1.04924e-12	-0.0770323	0.835526		14.0002	15.2322	11.8123	0.494774	0.00852568	0.0280214	0.980637
Glyma.01G002400	17.8963	22.9991	2.80767	-2.40903	7.53957e-13	0.366932	0.582629		29.6381	28.8136	6.56253	-1.26506	4.79513e-08	-0.142688	0.824844
Glyma.01G002600	16.1869	13.6844	3.20628	-1.4746	1.49602e-06	-0.221382	0.743848		38.2531	32.8929	5.65039	-1.67333	1.63755e-28	-0.309687	0.0924638
Glyma.01G002700	9.93191	9.3938	6.94204	0.164236	0.516278	-0.0539101	0.952022		20.5486	18.5865	30.7403	1.58601	2.29523e-23	-0.238429	0.540701
Glyma.01G002900	7.91041	6.58957	19.0973	2.12384	7.63776e-20	-0.221304	0.739715		5.27262	4.48798	10.8543	2.11746	2.69826e-12	-0.329784	0.7239
Glyma.01G003000	2.13153	4.09688	14.3928	2.43515	1.26676e-10	0.921299	0.257223		1.14573	1.25586	9.38715	3.78355	5.55849e-22	0.0193038	1
Glyma.01G003100	12.4864	9.44165	5.69883	-0.134579	0.662979	-0.378618	0.506596		13.276	11.9003	8.37956	0.373175	0.120904	-0.263845	0.639594
Glyma.01G003200	1.07722	1.03971	0.315585	-1.1131	0.108647	-0.0573669	0.9886		0.280488	0.474833	0.0387773	-2.55788	0.0482927	0.683033	0.778097
Glyma.01G003400	10.7789	8.90442	8.73618	0.586474	0.0670171	-0.274942	0.738006		3.86883	3.45711	4.0924	1.12792	0.000465734	-0.272002	0.786905
Glyma.01G003600	19.2638	14.3334	1.50045	-2.65533	6.84883e-19	-0.408487	0.263147		11.1896	9.61811	0.876158	-2.62532	3.05032e-15	-0.313539	0.519116
Glyma.01G003700	30.878	22.8877	3.31506	-2.18543	3.12852e-32	-0.408798	0.0743839		46.2061	40.7538	3.22834	-2.81476	5.3492e-36	-0.276763	0.370062
Glyma.01G003800	25.5906	18.698	3.8998	-1.65839	2.42534e-13	-0.432903	0.160256		32.6806	25.603	3.5103	-2.00494	6.19703e-27	-0.447496	0.0114516
Glyma.01G004000	0.0724341	0.148886	0.528861	2.44929	0.142351	0.999449	0.876291		0.934566	1.41738	2.11463	1.48041	0.0193352	0.506282	0.827106
Glyma.01G004100	15.9367	19.7257	25.0335	0.962772	5.24589e-10	0.322338	0.256722		3.96058	4.87784	7.21887	1.41785	5.9017e-13	0.208679	0.72411
Glyma.01G004200	0.127316	0.841165	3.59081	2.64552	0.000237266	2.67278	0.205799		0.283862	1.25715	4.5226	2.68069	3.95183e-10	1.9332	0.0479358
Glyma.01G004300	67.5823	68.0844	21.8802	-1.03457	2.89769e-09	0.0362917	0.952558		514.636	433.009	69.6393	-1.77131	4.38348e-19	-0.342583	0.398995
Glyma.01G004400	2.57746	3.30099	1.56826	-0.47002	0.405492	0.37438	0.801887		0.522642	0.556849	0.335191	0.19173	0.834982	-0.0151849	1
Glyma.01G004500	21.3424	24.1426	31.1168	0.979745	5.4129e-11	0.203845	0.560819		34.2097	37.7958	33.6191	0.691209	3.0225e-07	0.0470602	0.93606
Glyma.01G004600	20.1791	28.6103	4.28551	-2.1297	5.07748e-11	0.519144	0.271795		16.5391	27.3009	2.78797	-2.46319	7.80323e-20	0.628684	0.0177829
Glyma.01G004700	4.33158	3.75292	0.17823	-3.81578	4.48101e-07	-0.194809	0.881263		10.6006	7.87902	0.161658	-4.52277	5.48642e-09	-0.523697	0.227543
Glyma.01G004900	0.754678	1.00937	0.0707334	-3.07763	0.0635058	0.467615	0.907842		0.55755	1.10203	0.175947	-1.77275	0.147701	0.947902	0.716702
Glyma.01G005000	85.5856	111.338	15.7784	-2.20945	2.22163e-44	0.405437	0.0515121		84.0205	111.191	14.2117	-2.10472	5.51631e-07	0.311541	0.825714
Glyma.01G005200	2.84855	3.13477	0.865819	-1.24219	0.00260179	0.157318	0.897765		1.28313	1.65586	0.365883	-1.24168	0.0119932	0.25313	0.860572
Glyma.01G005300	16.3874	15.2412	7.91669	-0.337802	0.223447	-0.0861735	0.922778		20.4252	20.077	13.2566	0.264675	0.183845	-0.123194	0.849542
Glyma.01G005400	1.46896	1.14808	114.313	7.24623	5.94925e-162	-0.32704	0.711734		0.956989	0.948127	65.9618	6.94557	5.86267e-156	-0.0566392	0.979324
Glyma.01G005500	2.38032	2.23356	0.495424	-1.56617	0.00227031	-0.0675979	0.974327		1.40383	2.06726	0.290189	-1.92258	0.00191136	0.476159	0.735701
Glyma.01G005600	14.2684	16.2813	0.956494	-3.46984	3.68463e-15	0.201658	0.806403		6.52157	6.81945	0.620059	-2.63135	1.31298e-10	-0.035204	0.982417
Glyma.01G005800	1.16736	0.935909	0.941014	0.594252	0.308987	-0.255046	0.891772		0.666503	0.682797	0.398786	0.0653954	0.937714	-0.0952525	0.980885
Glyma.01G006000	31.5527	17.2044	1346.16	6.90866	2.39862e-83	-0.838856	0.171973		24.4802	14.8469	358.189	5.45079	1.80145e-33	-0.807988	0.406909
Glyma.01G006100	37.153	31.567	113.042	2.44482	2.35809e-124	-0.206915	0.284359		17.9755	19.0717	55.621	2.40293	9.90308e-90	-0.0127793	0.993632
Glyma.01G006200	40.7318	39.9997	157.125	2.58233	1.68502e-54	0.0101286	0.994901		316.148	436.116	762.907	1.66448	8.27736e-14	0.371265	0.450821
Glyma.01G006300	0	0	0	NA	NA	NA	NA		4.13406	4.28202	17.2839	2.87351	1.98493e-20	-0.0232009	1
Glyma.01G006400	32.8415	24.8118	16.8027	0.0445679	0.694354	-0.381221	0.00408962		22.2765	22.1308	7.78742	-0.642644	1.35479e-06	-0.102423	0.782139
Glyma.01G006500	16.2032	15.5047	7.93045	-0.363003	0.00145676	-0.0427342	0.909644		5.34332	6.92868	2.24142	-0.773628	5.50364e-05	0.289335	0.406691
Glyma.01G006600	33.8408	28.817	27.5009	0.53277	4.50263e-06	-0.204562	0.348858		4.53292	4.39914	4.17769	0.77342	1.42292e-05	-0.134364	0.817196
Glyma.01G006700	6.78175	5.6741	16.9426	2.18395	6.28024e-32	-0.226428	0.639054		2.25833	2.54446	14.1528	3.3125	5.49443e-41	0.110775	0.923387
Glyma.01G006800	3.31015	3.59807	1.32951	-0.820528	0.0312676	0.151677	0.895752		1.64403	2.24688	0.567502	-1.18115	0.0359933	0.337695	0.820061
Glyma.01G006900	21.7262	23.567	19.0159	0.301783	0.0496259	0.141673	0.715548		38.7417	41.3372	22.9286	0.00997091	0.956074	-0.00534849	1
Glyma.01G007000	2.85654	3.49941	0.392129	-2.52831	0.000297157	0.315808	0.840247		0.834989	1.46353	0.204168	-2.04691	0.00895521	0.692273	0.61765
Glyma.01G007100	2.32118	2.6202	0	-4.78983	0.00203559	0.145119	0.976687		1.55991	2.32699	0.120131	-3.44124	0.00415867	0.495787	0.799194
Glyma.01G007200	7.88169	6.35097	22.015	2.40026	8.33757e-43	-0.277546	0.49464		10.8065	8.55323	19.5239	2.05663	4.14571e-35	-0.444629	0.122769
Glyma.01G007300	2.57511	2.48055	1.24922	-0.364242	0.389714	-0.0484698	0.980995		1.65449	1.01855	0.422196	-0.453105	0.463384	-0.777195	0.430875
Glyma.01G007400	12.46	13.7271	21.7321	1.28321	1.04876e-11	0.151028	0.791581		2.12728	1.63569	2.91607	1.6957	5.08968e-11	-0.483165	0.368307
Glyma.01G007500	0	0.0876131	1.1334	4.28074	0.000870246	1.96363	0.628839		0	0	0.0481887	3.28968	0.301313	0	1
Glyma.01G007700	30.3157	30.8498	19.8406	-0.0313982	0.861223	0.050331	0.929173		20.5806	20.712	5.66155	-1.01522	5.26972e-11	-0.0873816	0.853782
Glyma.01G007800	43.268	27.3917	0.447693	-5.33389	1.47029e-87	-0.636085	2.09467e-07		37.5761	28.5835	0.461556	-5.05618	2.10019e-55	-0.492194	0.000692498
Glyma.01G008000	11.3374	12.4542	2.38874	-1.76599	6.63772e-11	0.148914	0.838446		16.255	17.7139	2.3043	-2.11346	1.69949e-15	0.0278419	0.983506
Glyma.01G008400	1.93281	2.47621	2.09762	0.368431	0.389651	0.40536	0.699832		3.51611	6.47468	4.03778	0.173895	0.566807	0.767021	0.0788996
Glyma.01G008500	43.5956	19.9331	33.7304	1.36755	1.42758e-11	-1.09534	4.81286e-06		56.3876	50.6975	50.6298	0.8584	6.80188e-10	-0.24741	0.388684
Glyma.01G008600	68.5864	55.1087	123.478	1.77233	1.70771e-53	-0.293914	0.130193		40.9476	32.6185	27.627	0.619123	7.59198e-08	-0.42021	0.00561815
Glyma.01G008700	3.78241	4.54657	0.749496	-2.00066	3.07203e-17	0.29354	0.455224		2.7075	4.15476	0.234875	-3.29504	1.14415e-11	0.521246	0.297877
Glyma.01G008800	14.1428	12.7644	1.26621	-2.7408	1.39981e-14	-0.117747	0.887613		46.7405	45.8943	6.64133	-1.90655	9.0347e-21	-0.124531	0.815097
Glyma.01G008900	18.3375	17.6486	10.8463	-0.097418	0.469429	-0.0361577	0.934887		13.2081	13.213	5.56334	-0.390255	0.0278281	-0.0951019	0.870616
Glyma.01G009000	0	0.234747	0.279825	0.916127	0.790254	1.07296	0.922444		0.642727	1.148	0.682556	0.178125	0.867057	0.729514	0.809929
Glyma.01G009200	11.626	11.9952	12.2003	0.619682	0.085602	0.0996887	0.939803		10.6411	8.53221	41.5498	3.14363	2.16596e-51	-0.408805	0.372224
Glyma.01G009300	30.5121	23.535	13.5899	-0.187358	0.204908	-0.352452	0.0980605		45.0692	40.8605	9.24774	-1.28358	3.64042e-26	-0.235345	0.197231
Glyma.01G009400	16.6747	14.9321	19.0948	0.956506	1.93783e-12	-0.128226	0.727022		2.54777	3.53449	4.28629	1.13219	1.09352e-06	0.386685	0.465924
Glyma.01G009500	4.56353	4.7896	0.251139	-3.63534	9.074e-06	0.0917776	0.966365		3.52778	3.9515	0.514048	-2.0471	0.0008671	0.0817442	0.968928
Glyma.01G009600	3.56591	4.81747	1.34381	-1.22726	0.00236363	0.455698	0.571702		2.30065	3.48602	0.858858	-1.11215	0.023094	0.491026	0.636436
Glyma.01G009700	91.7646	99.6711	0.491844	-7.03523	1.49746e-90	0.13868	0.556273		107.18	120.491	0.856857	-6.22888	2.05012e-132	0.072539	0.832914
Glyma.01G009800	8.76915	10.3602	5.47266	-0.309439	0.20137	0.253172	0.638401		53.9892	52.6803	16.7378	-0.786697	1.61207e-05	-0.127879	0.813938
Glyma.01G009900	5.51381	7.00336	18.7879	2.02139	9.1599e-27	0.379534	0.361436		7.73736	9.04139	15.8889	1.66388	1.59262e-19	0.13787	0.842557
Glyma.01G010000	15.1168	12.7611	2.7708	-1.59181	1.8496e-15	-0.22155	0.545864		9.02093	9.27816	1.96527	-1.3526	6.21727e-08	-0.0608324	0.945519
Glyma.01G010100	6.19419	6.25246	9.53496	1.22406	3.68836e-11	0.0437609	0.954816		3.08659	3.89051	6.02982	1.47851	2.4919e-08	0.25672	0.75797
Glyma.01G010200	39.22	29.71	256.247	3.72626	9.43369e-143	-0.375326	0.127343		88.6648	78.9362	1252.8	4.85239	1.47725e-212	-0.262635	0.460912
Glyma.01G010300	24.8141	23.6432	13.5489	-0.196146	0.225552	-0.0471107	0.93046		46.6162	47.804	18.5336	-0.49757	0.000253763	-0.0606034	0.90218
Glyma.01G010400	42.6263	28.2975	5.07582	-1.88878	6.43108e-26	-0.562029	0.00657584		68.9621	65.4074	13.3991	-1.41919	4.93641e-13	-0.169771	0.767969
Glyma.01G010500	3.88513	4.21887	10.9314	1.98496	5.00917e-09	0.164047	0.892927		2.05928	1.81702	8.62716	3.10293	1.22022e-31	-0.276317	0.750516
Glyma.01G010600	24.1192	20.9888	54.0114	1.98434	9.35929e-33	-0.193309	0.652519		67.3457	59.1882	74.7148	1.19944	1.9046e-27	-0.284698	0.124692
Glyma.01G010700	0	0	1.17366	6.39904	8.31966e-06	0	1		0	0	0.173325	5.01725	0.00630421	0	1
Glyma.01G010800	23.0157	22.599	13.1163	-0.182088	0.155623	-0.00203525	1		6.19122	7.68194	4.59677	0.128741	0.564991	0.214293	0.691596
Glyma.01G010900	7.99975	8.24207	14.1953	1.39754	2.84761e-10	0.0637504	0.942368		8.07139	9.39636	15.8434	1.60763	2.10852e-13	0.117431	0.89815
Glyma.01G011000	5.67161	5.49244	0.343364	-3.42942	0.00679899	0.0136528	1		23.8827	24.0304	0.948239	-3.61715	3.34156e-14	-0.0811112	0.934537
Glyma.01G011100	34.8011	29.2819	13.1758	-0.539982	0.000123319	-0.226473	0.36988		71.9773	61.9719	15.5006	-1.14534	6.42375e-16	-0.312411	0.144328
Glyma.01G011200	38.168	35.6883	19.0921	-0.297412	0.00714666	-0.0720724	0.818097		22.0736	26.0382	9.4823	-0.590565	2.55921e-06	0.146907	0.618499
Glyma.01G011300	42.8845	47.6003	200.95	2.69007	3.53396e-124	0.174868	0.515923		14.8697	16.9192	70.5737	2.92089	9.97699e-157	0.10104	0.798117
Glyma.01G011400	12.8673	13.9605	16.9056	0.886514	9.22165e-07	0.126972	0.822557		3.47521	3.69449	3.84551	0.911867	0.00564333	0.0282884	0.996227
Glyma.01G011500	0	0	1.46353	6.50318	2.27273e-06	0	1		0.0532305	0.0366465	1.2798	6.16235	5.70646e-06	-0.826785	0.901832
Glyma.01G011600	0.0374886	0.0328717	2.70373	6.68699	8.44685e-07	0.111183	0.994602		0.0208733	0.055075	0.765381	4.59179	0.000308816	0.908046	0.892397
Glyma.01G011700	4.98294	9.24633	13.7059	1.17857	1.11443e-05	0.917367	0.0442664		1.68014	2.12111	2.6774	1.21908	0.00116029	0.226537	0.877165
Glyma.01G011900	66.2601	52.8613	0.877422	-5.28411	3.3749e-119	-0.299784	0.0624182		64.2135	74.113	1.57921	-4.66249	1.36182e-118	0.112049	0.718452
Glyma.01G012000	40.1542	42.5056	1.9855	-3.79942	1.22842e-77	0.106753	0.761898		5.30807	4.88117	0.403087	-2.75558	1.16539e-15	-0.222908	0.692985
Glyma.01G012100	31.6674	17.6698	3.14868	-1.87855	2.68102e-25	-0.821075	1.00474e-06		30.7746	20.4582	2.10992	-2.37038	1.88988e-25	-0.684055	0.00142288
Glyma.01G012300	14.1702	9.75942	9.59665	0.597374	0.0597067	-0.520546	0.37367		25.2116	25.5573	17.4391	0.30771	0.282363	-0.0847981	0.94191
Glyma.01G012400	5.9559	7.31778	12.7519	1.41425	2.9971e-10	0.334204	0.525599		7.92464	7.86746	14.111	1.70633	1.21008e-20	-0.112326	0.880509
Glyma.01G012500	34.4207	23.0928	27.742	0.869043	1.00245e-09	-0.55345	0.00306837		29.3871	33.8507	26.2512	0.493639	0.000356076	0.112006	0.79699
Glyma.01G012700	15.7976	16.0686	5.94763	-0.839019	2.69611e-05	0.04814	0.945423		16.4461	22.0854	5.88762	-1.05149	1.93505e-07	0.328289	0.368526
Glyma.01G013000	3.56993	2.57093	0.413643	-2.02173	0.191589	-0.458963	0.902858		1.75371	2.4579	0	-4.43091	0.00162928	0.432559	0.882217
Glyma.01G013500	122.03	135.007	10.4642	-3.09024	1.60469e-83	0.170093	0.642825		37.0532	39.4714	2.32724	-3.20326	1.05083e-72	-0.00126106	1
Glyma.01G013600	26.2237	27.4043	22.5946	0.335377	0.0012668	0.0842221	0.766537		14.7043	16.1697	7.03242	-0.352232	0.0411325	0.0441281	0.951482
Glyma.01G013800	18.1982	19.0887	8.90215	-0.496826	0.0178271	0.0992251	0.878195		6.87762	7.24503	3.02365	-0.398579	0.129564	-0.0330564	0.983243
Glyma.01G013900	0.569992	0.867962	31.954	5.77219	2.04117e-43	0.687456	0.622664		1.55594	1.95735	18.3837	4.09079	6.58851e-30	0.200477	0.904189
Glyma.01G014000	1.32626	1.02337	2.16081	1.69151	0.00029212	-0.319037	0.831186		0.256507	0.42184	0.583438	1.34479	0.0162215	0.620245	0.714684
Glyma.01G014100	23.9761	31.1303	1.08891	-4.23258	2.76926e-71	0.396918	0.0463856		17.1443	18.1753	0.70178	-3.85089	6.07175e-30	-0.00277062	1
Glyma.01G014200	17.2671	16.3888	2.80547	-1.93586	1.33977e-35	-0.0562041	0.900515		11.7412	12.8525	2.91423	-1.28794	1.34853e-09	0.0403047	0.962626
Glyma.01G014400	17.9472	15.4965	9.81645	-0.0568559	0.757631	-0.181833	0.635174		15.1047	16.0296	15.1284	0.774621	4.76572e-07	-0.0121643	0.997795
Glyma.01G014500	21.5909	22.7545	6.01948	-1.32016	9.59145e-12	0.0991658	0.856277		17.4172	18.2086	3.09504	-1.68042	1.74133e-15	-0.0296957	0.973335
Glyma.01G014600	26.1467	28.4584	1.85478	-3.33342	9.18953e-65	0.153765	0.673593		12.665	14.9555	0.610509	-3.76494	6.17432e-41	0.151932	0.713907
Glyma.01G014700	44.0816	42.9739	48.3485	0.788412	8.80839e-09	-0.013387	0.98862		9.5368	10.0156	9.24242	0.738645	0.000348276	-0.0223164	0.991046
Glyma.01G014800	13.3866	17.4395	4.07547	-1.48185	4.00168e-16	0.403737	0.116614		12.2018	14.8371	5.9964	-0.429702	0.0502664	0.178801	0.75467
Glyma.01G014900	23.9185	20.2121	15.2157	0.187015	0.262555	-0.216198	0.517568		12.5372	13.4508	10.7021	0.530036	0.00347924	0.00181648	1
Glyma.01G015000	61.5379	59.3117	89.1671	1.19716	2.17638e-39	-0.0311463	0.925418		41.195	49.8063	46.8334	0.771796	9.22692e-14	0.180276	0.412784
Glyma.01G015100	26.0353	23.171	36.4673	1.26939	1.56296e-19	-0.149206	0.68514		52.3432	46.9063	115.494	2.16041	1.68296e-60	-0.252047	0.363355
Glyma.01G015200	4.95266	4.99986	2.63563	-0.326082	0.338416	0.0417773	0.97942		1.74553	1.65811	0.653233	-0.503238	0.445263	-0.143997	0.956243
Glyma.01G015300	11.6127	15.0505	8.26582	-0.259358	0.393409	0.4008	0.505515		6.98299	8.24403	5.01974	0.149166	0.591195	0.147544	0.867488
Glyma.01G015400	20.055	26.8454	25.389	0.516354	0.0254607	0.44961	0.300674		61.2144	77.1707	47.806	0.173425	0.280744	0.237432	0.46913
Glyma.01G015500	20.1272	16.5468	22.58	1.05464	1.69499e-07	-0.258907	0.571702		38.9904	40.6896	40.6016	0.86046	6.96197e-06	-0.034574	0.974839
Glyma.01G015600	8.92743	10.7674	10.2756	0.547562	0.0017414	0.285124	0.424191		6.16895	8.72882	5.67516	0.225047	0.371026	0.399699	0.401955
Glyma.01G015700	12.6576	12.5304	9.64225	0.235052	0.265551	0.00702815	0.998688		4.03484	4.0247	1.94275	-0.190265	0.522291	-0.0945638	0.92612
Glyma.01G015900	56.0662	53.6893	33.3678	-0.075419	0.514089	-0.0397023	0.912859		15.7866	15.4204	10.0738	0.242825	0.10534	-0.119059	0.779692
Glyma.01G016000	105.428	110.862	43.165	-0.748509	0.0134043	0.0985611	0.918152		2.22179	3.285	1.74783	-0.127173	0.915933	0.449852	0.904764
Glyma.01G016100	42.6546	48.3151	22.1087	-0.528127	0.000251289	0.200348	0.489889		0.907405	1.049	0.465724	-0.329999	0.598695	0.137251	0.957561
Glyma.01G016200	8.3388	8.33764	20.5339	1.90958	2.9754e-22	0.0192601	0.990829		1.36909	1.3206	2.56704	1.85571	2.27588e-06	-0.20337	0.900853
Glyma.01G016400	16.2952	15.2572	21.1499	1.08231	2.19423e-13	-0.06972	0.892927		9.43343	10.1938	6.76176	0.256382	0.287	0.0317314	0.982286
Glyma.01G016500	65.7502	63.0476	30.9716	-0.421101	0.000161454	-0.0315943	0.935929		22.4043	24.8398	10.0771	-0.435553	0.000516291	0.0573049	0.900985
Glyma.01G016800	17.4845	18.0387	26.0582	1.14134	3.14424e-14	0.0746854	0.889642		18.201	22.2559	73.4764	2.59039	4.7083e-92	0.199073	0.551915
Glyma.01G016900	26.9922	27.4297	14.7788	-0.284461	0.0317342	0.0443714	0.91877		25.8514	25.9954	8.79086	-0.700626	8.53951e-07	-0.0863296	0.845099
Glyma.01G017000	18.0981	21.5303	41.9705	1.58508	3.43882e-16	0.262747	0.593733		10.2943	17.2657	26.5313	1.48873	1.45089e-17	0.645776	0.0169702
Glyma.01G017100	15.7091	18.5142	12.6105	0.0598663	0.773789	0.269464	0.498886		17.7616	19.5078	14.166	0.386624	0.079703	0.0377828	0.974839
Glyma.01G017300	7.41484	8.1017	0.617709	-3.12125	4.07293e-07	0.160528	0.906194		2.85695	2.98488	0.437242	-1.82127	0.00137999	-0.0481552	0.98876
Glyma.01G017400	11.0302	8.111	31.8284	2.57024	1.87125e-39	-0.419847	0.267599		14.1501	8.30671	24.2104	2.40156	1.27662e-37	-0.863971	0.000572686
Glyma.01G017700	23.6233	21.142	146.256	3.41485	2.67877e-96	-0.135689	0.790293		11.2906	12.6373	57.2992	3.03905	2.22859e-143	0.0757429	0.887929
Glyma.01G017800	8.68923	11.519	68.678	3.17404	1.08617e-43	0.417114	0.485892		2.35097	3.94544	14.7218	2.79153	3.60082e-19	0.61676	0.426239
Glyma.01G017900	4.2215	3.63616	2.93633	0.296805	0.675928	-0.184368	0.937711		5.68959	5.60614	5.27828	0.791377	0.0220506	-0.104203	0.946101
Glyma.01G018000	0.442059	0	5.98289	7.1864	4.00078e-08	-2.75191	0.311236		0.537637	0.0453994	9.81366	8.33087	2.05731e-11	-3.28867	0.13913
Glyma.01G018100	2.61073	1.13293	1.87625	1.33817	0.185924	-1.13663	0.609976		11.2725	14.5179	32.6258	2.03626	9.05239e-25	0.279813	0.612208
Glyma.01G018200	3.55431	1.94815	1.281	-0.00360176	0.998845	-0.868084	0.666027		0.351985	0.390006	0	-1.41632	0.591512	0.027462	1
Glyma.01G018300	35.4513	30.0557	3.50799	-2.50283	9.093e-38	-0.214545	0.518196		14.7644	12.492	1.19625	-2.48138	1.575e-21	-0.331103	0.377595
Glyma.01G018400	108.063	111.728	56.3107	-0.37185	0.00221509	0.0639632	0.863682		43.5621	39.7345	28.8702	0.393146	0.00274886	-0.224169	0.38395
Glyma.01G018600	28.431	30.9858	4.26041	-2.24888	1.34983e-32	0.147449	0.699832		18.2521	22.4088	2.73215	-2.16908	5.76199e-15	0.19055	0.726822
Glyma.01G018700	10.4224	12.3227	6.1587	-0.399147	0.197982	0.276347	0.707382		12.4364	13.1903	7.83863	0.101828	0.64497	-0.010511	1
Glyma.01G018800	1.25485	1.24337	1.72911	1.03575	0.207651	0.077216	0.990093		5.61145	4.97884	19.0401	2.80314	1.33995e-20	-0.254168	0.80996
Glyma.01G019000	3.30699	2.70114	0.218717	-3.04452	8.1232e-06	-0.266386	0.835526		6.35211	6.55246	0.247179	-3.99756	1.28602e-09	-0.0588025	0.969876
Glyma.01G019100	28.9484	25.1111	25.6177	0.634717	6.89675e-07	-0.184527	0.489889		11.5179	15.0302	14.3201	0.789909	2.83607e-10	0.289695	0.198661
Glyma.01G019200	3.19715	2.81792	4.84302	1.38652	7.0151e-09	-0.168457	0.825593		3.67216	2.53729	3.46822	1.30871	4.61608e-06	-0.641961	0.194922
Glyma.01G019300	48.1699	66.3557	4.14217	-3.4112	3.98604e-55	0.487024	0.0600533		24.3123	25.5497	2.52551	-2.47082	3.23307e-41	-0.0199044	0.981424
Glyma.01G019400	76.5073	64.6183	17.971	-1.24046	1.78014e-28	-0.218634	0.208622		72.1594	66.4655	12.6162	-1.53525	4.14705e-46	-0.21497	0.194662
Glyma.01G019500	2.6664	6.76735	5.11454	0.220583	0.738275	1.38901	0.21986		5.79066	9.04323	9.31817	0.893766	0.0613775	0.54588	0.665663
Glyma.01G019600	24.2636	22.1058	1.79594	-3.00855	3.15504e-26	-0.121489	0.835609		13.4499	12.9554	0.875371	-3.02488	2.42559e-21	-0.14956	0.795951
Glyma.01G019700	87.7542	102.112	4.30654	-3.9612	6.5948e-87	0.238998	0.243903		66.038	76.8729	1.63109	-4.68625	2.01555e-85	0.122658	0.651225
Glyma.01G019800	60.1954	54.9976	1109.81	4.93365	0	-0.105867	0.690062		33.1407	46.3553	432.293	4.08048	1.84505e-251	0.389485	0.0429963
Glyma.01G019900	12.0903	12.1079	14.6587	0.876454	1.07338e-06	0.0281567	0.974724		6.37014	7.44232	6.14783	0.593109	0.00780112	0.122346	0.882217
Glyma.01G020200	47.2295	42.1166	35.1144	0.343458	0.0600798	-0.148237	0.757148		13.7694	12.9404	7.22072	0.0204649	0.945756	-0.178502	0.810463
Glyma.01G020300	25.507	21.7616	25.6985	0.84375	6.25542e-17	-0.205843	0.256544		29.1079	25.8165	22.5592	0.661388	1.04058e-08	-0.268418	0.170762
Glyma.01G020400	4.88106	7.20544	0.426674	-3.47466	0.000789248	0.578364	0.723653		2.76547	4.02365	0.243424	-3.26306	0.000844063	0.409216	0.800264
Glyma.01G020800	1.86266	1.61678	0.0832233	-3.66745	3.06243e-07	-0.163283	0.906451		3.0267	2.82618	0.0781586	-4.47277	8.62783e-07	-0.17697	0.888411
Glyma.01G020900	5.37939	3.65649	0.559725	-2.10118	1.64642e-07	-0.534373	0.305484		17.6782	23.3085	11.3758	-0.17166	0.335903	0.310992	0.30572
Glyma.01G021100	14.7062	22.1231	6.18167	-1.22109	1.09859e-05	0.59281	0.157617		9.05836	13.2958	1.04634	-2.78235	2.57258e-17	0.445147	0.250188
Glyma.01G021200	32.5312	26.5308	0.125884	-7.12392	6.71391e-36	-0.271128	0.310234		16.0265	19.2484	0.12431	-6.28818	1.9067e-32	0.16989	0.565652
Glyma.01G021300	17.1365	16.5955	11.0148	0.010775	0.955981	-0.0272061	0.97015		8.43045	11.9059	4.29934	-0.635474	0.00786769	0.403872	0.328185
Glyma.01G021400	34.0736	35.9111	14.3931	-0.713735	2.49862e-09	0.0960104	0.754391		17.6569	19.5463	7.38191	-0.546442	0.000171891	0.0488104	0.926074
Glyma.01G021500	0.222689	0.67093	0	-2.43283	0.424458	1.57905	0.861444		1.23796	1.13438	0	-3.77856	0.0113167	-0.223167	0.960565
Glyma.01G021600	20.3946	21.1819	13.3717	-0.0539907	0.754602	0.0725508	0.888636		17.739	22.7381	17.5717	0.488004	0.000147741	0.264808	0.259395
Glyma.01G021700	0.12106	0.344498	1.29965	2.49327	0.0157401	1.43905	0.682982		0.0680605	0.11972	0.454155	2.74023	0.0447385	0.545862	0.93606
Glyma.01G021900	12.7728	18.9054	25.9164	1.07133	8.36255e-06	0.584816	0.182693		2.75379	4.6125	9.9846	1.99062	7.58253e-12	0.613559	0.382251
Glyma.01G022100	239.061	197.082	57.9829	-1.15846	6.94852e-19	-0.25665	0.203959		906.677	820.333	107.133	-2.0754	2.12016e-88	-0.237318	0.170423
Glyma.01G022200	5.24961	4.83268	1.00761	-1.64637	0.065134	-0.0794453	0.985604		0.699168	1.37744	0.31182	-1.37614	0.35054	0.835458	0.822076
Glyma.01G022300	0.930813	1.40413	0.437792	-1.0828	0.255177	0.608121	0.804598		0.397466	0.800643	0.0952769	-2.23205	0.0383122	0.903442	0.618394
Glyma.01G022400	21.6995	25.048	2.78856	-2.55822	6.80529e-48	0.227748	0.387		16.7401	20.6527	1.47895	-2.97198	7.56486e-32	0.2077	0.619712
Glyma.01G022500	2.96799	3.47222	0.0436674	-5.70288	2.45127e-07	0.239489	0.836208		4.07016	4.86776	0.0286582	-6.4578	2.06977e-07	0.150551	0.893745
Glyma.01G022600	4.23777	4.02204	76.293	4.86244	2.35208e-182	-0.050646	0.949135		2.20919	2.21254	21.5439	4.1366	5.95815e-72	-0.0842237	0.946847
Glyma.01G022700	19.1411	17.1293	2.49303	-2.18427	5.53926e-17	-0.135733	0.852408		10.0734	10.5297	1.23933	-2.17781	4.82913e-18	-0.035586	0.972665
Glyma.01G022800	9.49896	8.17004	1.00963	-2.41009	1.34438e-22	-0.197911	0.642326		7.49128	5.73257	0.499086	-2.61772	1.27477e-11	-0.477823	0.291182
Glyma.01G022900	4.01006	4.85085	1.48747	-1.10085	0.00141922	0.301512	0.702371		1.0987	1.76109	0.513831	-0.880147	0.0465288	0.551771	0.528043
Glyma.01G023000	34.4251	35.6736	58.1033	1.30893	1.02817e-22	0.0765803	0.865364		23.1109	22.7341	30.9832	1.3065	4.96035e-19	-0.10544	0.843576
Glyma.01G023200	14.5778	15.2948	25.8756	1.36747	2.82947e-24	0.0911103	0.834603		7.59417	9.94308	20.6259	1.91878	7.18752e-48	0.29321	0.294513
Glyma.01G023300	31.1859	35.1531	17.8812	-0.363223	0.00868653	0.195814	0.476377		24.4068	30.8079	38.2745	1.17237	2.84134e-26	0.24283	0.251091
Glyma.01G023400	3.64021	5.51841	0	-7.14208	2.30752e-08	0.617065	0.533022		1.0803	2.04924	0	-4.35398	0.00242361	0.818317	0.739877
Glyma.01G023500	42.0553	44.6784	11.6418	-1.33061	3.75848e-24	0.106313	0.748004		70.4217	81.5624	13.6898	-1.7159	3.13624e-38	0.114225	0.723893
Glyma.01G023600	39.3369	37.2856	21.1733	-0.208996	0.00587884	-0.0545721	0.794226		13.1807	14.6411	8.73487	0.111986	0.444006	0.0569852	0.913908
Glyma.01G023700	17.6064	14.0449	7.70004	-0.27084	0.0650731	-0.298743	0.190668		3.38309	3.54049	1.32714	-0.554305	0.0396183	-0.0245972	0.99033
Glyma.01G023800	3.60759	4.03854	1.11195	-1.25331	0.000116294	0.175389	0.845511		8.65295	8.45687	1.78436	-1.37776	7.90648e-06	-0.123765	0.889437
Glyma.01G023900	21.0573	21.9392	14.9483	0.0565411	0.671995	0.0813192	0.823429		6.26105	6.63668	2.86673	-0.363569	0.13183	-0.021759	0.992941
Glyma.01G024000	8.80365	12.7045	26.2144	1.64316	8.33148e-09	0.559764	0.354126		32.943	33.5579	60.7665	1.7163	3.63412e-24	-0.0676807	0.925216
Glyma.01G024300	3.83203	4.33806	8.22546	1.54305	7.3818e-05	0.180782	0.89834		1.80468	1.2937	6.62501	3.18908	4.21196e-16	-0.538328	0.639594
Glyma.01G024400	0.824818	1.02698	2.29782	1.76156	0.00670797	0.335467	0.891772		0.217204	0.0654386	0.875306	4.4297	0.00564045	-1.47438	0.7889
Glyma.01G024500	0.380466	0.913149	3.8223	2.61423	0.00105725	1.38971	0.548344		0.184545	0.486841	4.36539	4.00411	2.20875e-16	1.16768	0.4796
Glyma.01G024600	36.0903	36.8078	13.8524	-0.792452	4.84388e-05	0.0500783	0.941662		24.2364	21.366	13.0599	0.154512	0.392385	-0.280119	0.374713
Glyma.01G024700	29.2631	26.0159	4.31081	-1.99054	4.79171e-19	-0.140109	0.78677		10.4271	12.4431	3.13897	-1.14848	8.83685e-07	0.170282	0.772377
Glyma.01G025000	60.4755	80.4781	1.90538	-4.77982	1.68164e-71	0.430642	0.0265725		31.8076	43.7998	0.787672	-4.95919	5.30466e-56	0.36569	0.0653912
Glyma.01G025100	20.6138	23.7219	36.8476	1.25366	1.11549e-09	0.217625	0.701885		285.18	340.677	519.227	1.46795	4.40388e-15	0.165303	0.781571
Glyma.01G025200	13.6233	12.5632	3.69767	-1.1499	3.71213e-08	-0.0917348	0.883163		9.19484	8.97174	3.54511	-0.504153	0.0925177	-0.13114	0.899668
Glyma.01G025300	18.6741	16.209	20.7182	0.958725	8.08259e-05	-0.187529	0.786793		8.45661	8.81899	13.4805	1.47586	5.30698e-11	-0.0309291	0.984848
Glyma.01G025400	12.6165	22.7242	0	-8.53176	4.43539e-12	0.882859	0.0399797		7.35643	6.79047	0	-7.31983	3.70086e-09	-0.210219	0.836659
Glyma.01G025500	6.47714	5.15151	14.2487	2.08376	1.74764e-13	-0.309669	0.685666		6.6629	4.84221	12.4414	2.23455	6.69927e-19	-0.566985	0.242311
Glyma.01G025600	13.7044	13.869	66.2843	2.86148	1.59277e-86	0.04661	0.940757		7.63483	8.89602	33.6857	2.77309	1.27415e-61	0.137661	0.832915
Glyma.01G025700	1.11937	8.24551	1423.57	7.95681	3.27241e-47	2.99932	0.16805		0	0.916632	301.627	9.48387	1.79992e-16	1.92176	0.674049
Glyma.01G025800	13.4541	21.8128	1099.96	6.26867	0	0.727721	0.013113		5.55823	5.79836	238.077	6.2353	6.64746e-136	-0.0452015	0.980009
Glyma.01G025900	1.50527	2.70758	1.46571	-0.269482	0.791946	0.883087	0.723659		0	0.0751332	0	-0.0424724	0.994061	1.00602	0.962626
Glyma.01G026000	30.8325	23.6911	27.768	0.831199	2.45473e-15	-0.353735	0.0167885		7.50593	8.38575	5.99773	0.374018	0.0277867	0.0716751	0.910526
Glyma.01G026100	17.3853	18.3901	5.6036	-1.09597	2.45931e-06	0.0919234	0.897911		170.29	151.705	24.6403	-1.75896	3.61017e-18	-0.257942	0.602438
Glyma.01G026200	8.29544	7.09886	0.821884	-2.5014	8.93033e-23	-0.195429	0.658023		14.7099	13.7705	1.08728	-2.81274	3.87566e-22	-0.19484	0.659382
Glyma.01G026400	7.93069	6.35099	1.40242	-1.56515	0.000249857	-0.29749	0.749792		2.73758	3.06308	0.915812	-0.887884	0.0191823	0.0554577	0.974626
Glyma.01G026500	14.5875	14.4905	13.1242	0.453618	0.0426738	0.0259627	0.983148		11.3496	10.425	7.96679	0.476024	0.0908052	-0.210323	0.808435
Glyma.01G026600	1.32138	2.32491	0.497793	-1.58523	0.137307	0.842194	0.724123		1.83604	2.73177	0.381819	-1.83969	0.0121326	0.46746	0.780251
Glyma.01G026700	17.6977	15.617	210.836	4.37432	2.75654e-189	-0.157116	0.694869		38.2551	41.7724	1244.12	5.7552	0	0.0332363	0.95745
Glyma.01G026800	6.50824	6.00229	1.78024	-1.15407	0.000307813	-0.0825066	0.934887		17.9238	14.7343	2.66268	-1.62168	9.24741e-12	-0.38179	0.242514
Glyma.01G026900	4.17873	4.64975	0.36941	-3.04619	2.42654e-07	0.171984	0.901458		1.31573	2.03956	0	-4.86298	0.00062429	0.489277	0.864604
Glyma.01G027300	20.9112	19.9173	17.1751	0.386934	0.0105518	-0.0380313	0.946043		28.7099	33.0128	18.1569	-0.00554069	0.976465	0.10999	0.803042
Glyma.01G027500	16.7503	16.1417	36.553	1.79582	1.55059e-23	-0.0245127	0.981414		14.1559	17.3504	26.4621	1.46122	1.51247e-11	0.198377	0.776013
Glyma.01G027600	5.98711	6.90516	0.878357	-2.34359	4.19152e-08	0.216152	0.838311		0.907069	1.35451	0.156358	-2.34091	0.0016391	0.495414	0.713585
Glyma.01G027700	25.4895	22.8862	7.15943	-1.07302	8.64809e-09	-0.13386	0.77142		47.6139	43.385	13.0148	-0.856267	2.54248e-06	-0.228932	0.539007
Glyma.01G027800	9.19607	9.14404	0.859462	-2.80583	2.25104e-19	0.0105725	0.995736		5.52664	6.14843	1.3043	-1.42303	1.08717e-05	0.062444	0.960565
Glyma.01G028100	2.38343	3.08909	2.67681	0.412639	0.210823	0.392031	0.602471		0.757507	1.01051	1.01411	0.846654	0.0941314	0.329132	0.854623
Glyma.01G028200	4.11231	4.45434	0.939021	-1.64825	8.16263e-05	0.12944	0.913584		7.74012	10.5109	12.0249	1.0577	2.70062e-05	0.332349	0.610052
Glyma.01G028300	11.2708	17.5417	0.0385734	-8.21151	1.01099e-21	0.654059	0.000508434		4.81298	4.92423	0	-6.71608	7.87181e-08	-0.0523309	0.980009
Glyma.01G028500	0.730863	1.22196	0.227305	-1.87259	0.153854	0.758069	0.809175		3.36298	6.41905	3.86073	0.150083	0.706562	0.838573	0.180499
Glyma.01G028600	12.78	9.98324	1.05584	-2.64223	8.69148e-20	-0.327536	0.421053		5.38099	5.03355	0.665099	-2.13145	7.83313e-08	-0.189042	0.835929
Glyma.01G028700	41.9501	34.601	28.6708	0.329256	0.016252	-0.25885	0.272849		12.9987	13.922	13.3032	0.8012	8.99018e-06	0.00671133	1
Glyma.01G028800	57.3568	45.8957	210.448	2.79515	1.2963e-84	-0.287463	0.325128		20.9712	21.7002	54.5801	2.1954	6.9643e-37	-0.0353611	0.972665
Glyma.01G028900	26.3296	21.6974	14.433	0.0164295	0.917479	-0.254826	0.299697		60.9161	60.7332	32.7403	-0.0273371	0.855102	-0.0983093	0.814034
Glyma.01G029000	20.912	15.4437	9.00493	-0.156821	0.514395	-0.424485	0.25696		39.9124	33.7498	22.3564	0.262941	0.0957926	-0.334628	0.182416
Glyma.01G029100	11.9142	12.173	40.8864	2.36149	2.05926e-45	0.0647844	0.917738		8.81215	11.1434	36.0699	2.54853	1.47005e-39	0.249181	0.657823
Glyma.01G029200	155.22	157.708	35.5165	-1.55328	2.43126e-26	0.045069	0.924902		627.358	518.283	90.7012	-1.65214	1.30973e-15	-0.368068	0.388331
Glyma.01G029300	2.28569	0.743974	4.69601	3.27399	5.79611e-09	-1.6007	0.0760243		0.675639	1.26114	2.39639	1.81952	0.000591495	0.849334	0.559743
Glyma.01G029400	22.2562	21.2232	1.96792	-2.82691	1.01442e-12	-0.0514959	0.964418		217.848	208.205	14.3205	-2.95019	1.2816e-34	-0.159512	0.710152
Glyma.01G029500	18.2623	17.2789	18.8395	0.739172	3.50033e-07	-0.0643035	0.897133		6.24084	7.07983	5.26817	0.423231	0.0482705	0.0956651	0.904226
Glyma.01G029600	32.0859	28.4703	13.4621	-0.466162	0.0028077	-0.153386	0.664671		63.0379	59.8125	34.1849	0.0576205	0.744327	-0.172082	0.681549
Glyma.01G029700	16.1305	16.368	5.25407	-1.03528	0.000145058	0.0455085	0.964708		2.96697	4.80395	1.874	-0.474682	0.258064	0.597777	0.460912
Glyma.01G029800	45.8219	41.8922	18.9742	-0.532289	0.000110258	-0.106529	0.762616		153.171	143.661	42.5714	-0.889203	7.9526e-13	-0.18835	0.469357
Glyma.01G029900	2.72637	2.85539	0.0880196	-4.44691	1.05232e-07	0.106647	0.945186		1.9313	1.82014	0.0308397	-4.94504	0.000122982	-0.148437	0.93748
Glyma.01G030000	6.20782	6.91414	0.313449	-3.82408	0.000125218	0.181587	0.923949		13.5541	13.1617	0.463146	-3.98441	1.53369e-12	-0.142935	0.867518
Glyma.01G030300	8.65773	11.3633	7.33161	-0.0318563	0.929264	0.408591	0.564033		3.47834	3.93972	5.40547	1.33518	2.4582e-05	0.0856932	0.958103
Glyma.01G030400	12.9751	11.5588	87.1452	3.53213	2.23967e-129	-0.146488	0.735382		4.14948	5.76752	25.6152	3.0147	5.55488e-77	0.380576	0.321907
Glyma.01G030500	0.87157	0.714125	38.1727	6.34867	7.89588e-112	-0.272084	0.775802		1.39199	1.39151	69.9079	6.54329	1.56232e-125	-0.0599598	0.978703
Glyma.01G030600	33.8742	33.3935	15.8151	-0.468259	0.000982168	-0.00469452	0.998688		75.2682	71.9885	23.7965	-0.729464	4.69608e-07	-0.162569	0.628022
Glyma.01G030800	36.2088	33.9838	37.5275	0.753224	2.6109e-15	-0.0699955	0.80497		109.41	98.8888	58.9151	0.114389	0.353992	-0.239501	0.231488
Glyma.01G030900	62.2733	66.8828	58.0128	0.406683	0.0318414	0.122283	0.82603		25.7811	24.8894	23.6078	0.782925	1.08693e-08	-0.147294	0.69759
Glyma.01G031200	10.711	10.8247	3.56161	-0.995633	0.000256382	0.0311765	0.981089		9.58418	8.38462	1.6173	-1.51446	0.000545891	-0.303636	0.749337
Glyma.01G031300	45.9938	42.6998	0.162586	-7.39879	4.52578e-23	-0.0803978	0.878635		26.0103	26.4551	0.0472271	-8.04367	1.9575e-14	-0.0721511	0.888292
Glyma.01G031400	71.7705	94.2939	112.287	0.857395	6.7491e-18	0.419987	0.0012787		61.2741	80.9633	48.7772	0.128114	0.380095	0.307572	0.20296
Glyma.01G031500	5.92527	5.30617	5.13436	0.552772	0.0976098	-0.120698	0.913998		3.87292	4.27287	4.2227	0.833001	0.00206233	0.0252073	0.994442
Glyma.01G031700	36.1526	22.8066	3.0133	-2.31263	5.62627e-27	-0.644566	0.00144286		76.6411	62.4687	7.46021	-2.18772	7.84799e-48	-0.39124	0.0125199
Glyma.01G031800	10.2439	7.69963	8.17418	0.695441	0.00265209	-0.381437	0.387		2.49487	3.38339	2.90709	0.659824	0.0401348	0.338785	0.697807
Glyma.01G031900	42.5555	37.2564	260.384	3.41693	4.6361e-195	-0.162767	0.54031		8.59626	8.59421	50.6359	3.42249	1.42854e-109	-0.0908042	0.889528
Glyma.01G032000	25.1821	21.6348	0.815807	-4.14332	1.09278e-32	-0.185133	0.7026		11.5372	11.607	0.734468	-3.13345	1.9443e-17	-0.0970194	0.924263
Glyma.01G032100	24.2585	20.8756	21.8815	0.678496	1.59467e-12	-0.195413	0.249018		13.6715	13.0054	7.70633	0.0963046	0.58515	-0.167033	0.694601
Glyma.01G032200	9.54753	7.28902	0.37168	-3.70658	9.1174e-08	-0.378268	0.669781		3.51113	3.3627	0.150836	-3.51193	1.52358e-06	-0.167399	0.89412
Glyma.01G032300	2.27052	1.69991	1.60718	0.514256	0.39351	-0.406439	0.802997		1.9635	2.39579	3.26743	1.32612	0.000159423	0.173695	0.904189
Glyma.01G032400	1.45228	1.51441	2.08166	1.04346	0.00973065	0.130321	0.93046		0.250745	0.261617	0.340881	1.24466	0.0656465	-0.0435013	1
Glyma.01G032500	48.6557	35.6243	13.386	-0.815555	1.10179e-08	-0.428005	0.0302402		80.1656	69.4036	15.0795	-1.33989	4.32511e-14	-0.30334	0.391271
Glyma.01G032600	41.7463	40.4535	2.07106	-3.66371	4.71002e-43	-0.0172732	0.987142		43.9334	46.4129	1.75066	-3.84453	3.82674e-57	-0.0196985	0.979296
Glyma.01G032800	13.2706	17.4869	0.0780074	-7.05142	1.37369e-08	0.418285	0.544866		2.55442	4.58464	0	-6.39363	4.97449e-07	0.725988	0.418394
Glyma.01G032900	21.7533	27.2805	3.74282	-2.25824	9.53865e-33	0.343453	0.191507		1.14724	1.5934	0.179172	-2.3613	0.000115204	0.356344	0.770455
Glyma.01G033000	16.7193	19.573	2.38591	-2.41813	3.36962e-16	0.242719	0.687769		3.24985	4.88117	1.28266	-1.06501	0.00322533	0.47744	0.469357
Glyma.01G033200	11.9724	17.5668	9.32091	-0.306204	0.0911248	0.579137	0.0174584		1.45586	1.85091	1.56114	0.59313	0.0848874	0.261279	0.810463
Glyma.01G033300	24.5932	26.7107	135.928	2.95478	1.68385e-101	0.147708	0.693084		1.96485	2.64008	8.65377	2.56214	6.01248e-25	0.333148	0.64506
Glyma.01G033400	9.33379	9.26281	45.429	2.89084	7.20156e-31	0.0258474	0.990971		6.38674	7.53674	33.8429	3.04864	2.06773e-19	0.143603	0.929611
Glyma.01G033700	31.9756	31.649	1.45319	-3.84119	2.05143e-83	0.00148766	1		28.917	29.0383	1.71688	-3.19199	8.9078e-31	-0.0927327	0.86696
Glyma.01G033800	16.6204	14.6724	11.6457	0.268691	0.128914	-0.152255	0.730518		21.8038	23.8681	26.9833	1.03209	6.62849e-14	0.0374473	0.957585
Glyma.01G033900	16.6604	12.1663	7.14895	-0.166313	0.391167	-0.425691	0.117547		10.6467	10.3141	4.6084	-0.282901	0.255929	-0.141324	0.854321
Glyma.01G034000	47.662	32.7508	20.661	-0.0631088	0.829877	-0.517719	0.245713		234.479	185.922	44.4524	-1.19932	2.30837e-10	-0.428161	0.176089
Glyma.01G034100	2.3811	3.23849	1.14224	-0.905854	0.0155015	0.46513	0.534842		1.20893	1.54481	0.41865	-0.976424	0.0509991	0.256518	0.858395
Glyma.01G034200	6.52881	8.10867	25.2833	2.23403	4.74838e-38	0.34318	0.339117		2.76816	3.70951	10.5304	2.39153	4.25715e-19	0.33558	0.696682
Glyma.01G034300	6.95552	7.67575	7.06874	0.493523	0.00948991	0.160518	0.757665		3.70911	3.32465	2.54558	0.466509	0.159654	-0.258844	0.784761
Glyma.01G034400	5.62876	4.91709	4.68563	0.53575	0.230811	-0.192287	0.892927		1.59116	1.5284	1.57184	0.891886	0.128075	-0.116755	0.968348
Glyma.01G034600	1.56623	3.15726	0.292231	-2.84694	0.000348636	1.0207	0.361112		0.92122	1.17315	0	-5.00761	0.00017777	0.27175	0.907316
Glyma.01G034700	0.110395	0.0576493	122.296	11.3818	9.40967e-21	-0.781463	0.884374		0.223545	0	39.0021	12.1829	1.25772e-23	-3.79171	0.0695072
Glyma.01G034800	0.44063	0.539232	17.3428	5.52868	1.05771e-14	0.363163	0.913423		0.184618	0.129792	2.71266	5.18223	1.38867e-07	-0.389397	0.944531
Glyma.01G034900	36.3238	31.7152	4.76575	-2.13342	1.84139e-23	-0.170443	0.681734		10.9899	10.1055	2.34932	-1.24658	1.86689e-07	-0.218099	0.642499
Glyma.01G035000	16.4567	13.7305	0.0247691	-8.45984	3.46608e-12	-0.243809	0.541976		13.3089	11.9653	0	-8.85526	3.23706e-13	-0.24567	0.530689
Glyma.01G035100	10.9483	11.4264	4.01804	-0.893484	1.06127e-05	0.0849458	0.892248		17.2271	17.1347	7.80202	-0.285052	0.149903	-0.10569	0.874693
Glyma.01G035300	1.39592	1.62271	7.27472	2.8072	3.54193e-07	0.207833	0.927951		0.797226	1.33678	8.55894	3.6045	6.18462e-19	0.584391	0.69508
Glyma.01G035500	47.8265	75.8639	0.692085	-6.12458	1.64729e-06	0.672221	0.46266		37.196	38.7341	0.416137	-5.79613	4.15478e-06	-0.0525875	0.980884
Glyma.01G035600	19.7603	19.0398	0.592486	-4.38836	3.53617e-27	-0.0345056	0.967342		8.45868	10.2091	0.248477	-4.68581	1.52566e-11	0.167692	0.845072
Glyma.01G035700	10.1929	7.1017	1.95056	-1.252	8.65845e-05	-0.510489	0.302574		14.4363	11.2202	5.14297	-0.252399	0.285281	-0.466586	0.168465
Glyma.01G035800	6.03882	7.27232	20.706	2.11451	1.42655e-10	0.311193	0.76216		0.794971	1.22815	2.40378	1.88825	0.000668851	0.494534	0.803127
Glyma.01G035900	1.1659	1.16698	3.75092	2.35106	0.00254524	-0.0441875	0.995625		0.0353938	0.131786	0.219201	1.51284	0.47658	1.40993	0.861988
Glyma.01G036000	3.48155	0.910721	4.7186	2.9958	1.58805e-05	-1.89597	0.074988		5.49813	1.69413	3.19949	1.75934	0.000840331	-1.78615	0.0124236
Glyma.01G036100	28.0262	31.9684	28.2718	0.434219	0.065255	0.218469	0.720452		0.126804	0.318542	0	-2.11422	0.450187	1.23307	0.90167
Glyma.01G036200	29.0738	29.3078	49.8128	1.37388	3.22052e-76	0.0334372	0.897911		9.11633	8.32427	9.50323	1.04468	2.39871e-10	-0.21924	0.589605
Glyma.01G036300	2.13538	3.93641	10.2994	2.04967	0.00172003	0.864013	0.645046		2.02094	3.71305	10.3826	2.33922	5.64648e-08	0.750238	0.517452
Glyma.01G036500	33.052	28.6515	42.9955	1.20487	1.82507e-16	-0.187631	0.578868		32.551	33.0215	38.1286	1.06582	8.11011e-12	-0.076617	0.90167
Glyma.01G036700	35.9836	36.0996	24.9148	0.0756876	0.513557	0.0252277	0.95038		27.544	27.4322	15.8874	0.0673787	0.671935	-0.102319	0.824298
Glyma.01G036800	1.20453	0.927035	11.3701	4.23783	2.3871e-14	-0.374096	0.86189		0.321207	0.25015	6.25835	5.65937	4.39182e-17	-0.668565	0.794593
Glyma.01G036900	1.34526	0.464932	47.044	7.26249	3.43731e-24	-1.4786	0.32606		1.68513	0.700414	51.8957	7.06981	8.25638e-63	-1.33998	0.0694956
Glyma.01G037300	14.7322	12.0892	8.40196	0.0741162	0.713441	-0.254675	0.500964		18.7022	18.8394	14.0062	0.429977	0.00897868	-0.0856147	0.887692
Glyma.01G037400	14.3974	15.5431	11.2463	0.141169	0.392764	0.131949	0.753987		8.68325	8.73646	6.07668	0.327	0.154883	-0.0654918	0.945728
Glyma.01G037500	1.06099	1.32634	0.153001	-2.58589	0.0702589	0.365631	0.916911		3.81954	3.88093	0.103626	-4.28498	0.000155631	-0.0878545	0.969058
Glyma.01G037600	1.91841	3.16673	0.824916	-1.32927	0.0105399	0.75507	0.415507		0.879043	0.952941	0.127598	-1.96856	0.00905511	0.0568912	0.991046
Glyma.01G037700	24.4382	21.6919	57.6051	2.02136	5.1649e-73	-0.151915	0.576961		10.9956	11.6507	20.9036	1.70102	1.57795e-30	-0.0102654	1
Glyma.01G037900	10.5482	14.6408	11.3073	0.251464	0.342851	0.490295	0.294549		7.37258	8.27647	9.46076	1.04771	1.70857e-06	0.0722131	0.942696
Glyma.01G038000	19.0083	19.5138	1.69836	-2.90262	8.02952e-36	0.0550925	0.931255		7.08696	10.2879	1.16479	-2.29332	3.10744e-08	0.466624	0.456048
Glyma.01G038100	19.9299	15.5633	21.6396	1.08474	4.09961e-21	-0.338225	0.0557536		6.56144	5.96597	8.18043	1.31771	2.56729e-16	-0.225907	0.567413
Glyma.01G038200	24.5295	28.3965	46.4075	1.30877	6.85723e-08	0.243033	0.728688		20.1323	21.821	29.718	1.31571	1.04994e-06	0.0249731	0.995614
Glyma.01G038300	34.2275	31.8622	59.5395	1.50782	1.15362e-59	-0.0759401	0.776971		10.7403	12.4046	14.6241	1.09414	7.22184e-11	0.110135	0.860433
Glyma.01G038400	24.0379	26.2926	6.95332	-1.32233	6.43478e-11	0.155731	0.76515		13.1105	15.6966	4.82861	-0.82412	0.00100669	0.164662	0.841448
Glyma.01G038500	32.6281	35.9812	16.1278	-0.547209	0.00146332	0.163129	0.687998		6.00148	8.26452	5.41858	0.240622	0.251497	0.358527	0.353472
Glyma.01G038600	32.7887	34.6108	60.9324	1.42813	3.90212e-21	0.103753	0.830869		18.766	22.9494	29.5487	1.22742	5.85997e-23	0.198943	0.499013
Glyma.01G038700	20.1433	22.5926	48.2951	1.70112	9.60913e-46	0.196336	0.476008		7.90016	11.107	9.39328	0.625754	0.00361718	0.3993	0.345881
Glyma.01G038800	33.4738	33.0472	28.3632	0.396534	0.00377286	-0.00410628	1		28.9414	31.2618	19.3992	0.167327	0.221616	0.0171519	0.984234
Glyma.01G038900	9.4476	10.8213	0.608254	-3.54984	4.97601e-14	0.225952	0.776822		9.67937	11.0449	1.28413	-2.18377	2.9411e-12	0.100608	0.904105
Glyma.01G039000	20.3243	21.0742	36.0458	1.37897	3.59585e-33	0.0787603	0.829689		2.73495	3.86204	5.48515	1.36915	2.67248e-14	0.396831	0.271348
Glyma.01G039100	5.87924	7.18438	8.22485	0.821747	0.0119458	0.293401	0.74567		13.6297	13.7577	16.9664	1.17749	1.39733e-06	-0.088241	0.934028
Glyma.01G039200	19.8334	19.4158	3.98289	-1.66832	3.65395e-15	-0.00766072	0.997096		20.89	18.8634	4.62696	-1.15535	2.29625e-07	-0.24768	0.578755
Glyma.01G039400	5.34443	5.16465	0.253231	-3.74001	3.39366e-12	-0.0260316	0.990596		2.11634	1.42384	0.0817362	-3.29946	0.00513742	-0.628177	0.644439
Glyma.01G039500	30.2805	30.5678	6.60844	-1.60578	2.3526e-23	0.0361174	0.948804		8.09012	10.984	1.90518	-1.69397	1.47028e-14	0.345095	0.318248
Glyma.01G039600	7.22014	8.04981	0.703743	-2.88879	9.8398e-08	0.174557	0.900542		2.41644	3.45993	0.182721	-3.49254	1.8977e-08	0.413306	0.575582
Glyma.01G039800	17.0476	15.1311	4.19533	-1.24603	1.90194e-09	-0.155412	0.759861		5.29017	5.46179	2.26533	-0.393803	0.174927	-0.0478395	0.970894
Glyma.01G039900	0.804183	1.08603	0.193298	-1.90716	0.175556	0.425691	0.913998		1.45472	2.06071	0.439382	-1.32868	0.0385013	0.4548	0.759891
Glyma.01G040000	20.0871	18.5912	16.9611	0.484371	0.024388	-0.0975871	0.891654		28.7061	41.0916	23.0654	0.0329408	0.880457	0.419595	0.206077
Glyma.01G040100	2.9147	5.60868	1.0612	-1.78464	0.0114366	0.959357	0.448722		2.14814	5.53957	0.146492	-4.28802	0.000162814	1.29256	0.0923814
Glyma.01G040200	31.0657	30.4714	71.7618	1.83603	4.92756e-32	0.00680124	0.997732		74.932	90.9921	126.096	1.33132	1.31348e-24	0.187244	0.559066
Glyma.01G040300	10.0204	11.0942	20.9256	1.52949	1.37836e-14	0.162284	0.781699		4.7674	6.84071	10.2836	1.43367	2.90025e-12	0.435409	0.303587
Glyma.01G040400	3.67361	3.82989	115.807	5.54452	1.14145e-153	0.085889	0.91669		3.52852	3.35968	58.8316	5.00033	2.51201e-123	-0.178645	0.83727
Glyma.01G040500	13.5468	13.4359	5.79578	-0.606714	0.0324286	0.00115424	1		12.3239	10.3383	4.221	-0.457076	0.0867466	-0.341109	0.512629
Glyma.01G040600	0.788362	1.80136	24.0111	4.35284	4.20002e-10	1.28905	0.422404		0.40216	0.594124	9.00423	4.75607	2.53765e-23	0.618371	0.75912
Glyma.01G040700	0.128988	0.147349	11.0167	6.89813	1.05162e-07	0.111183	0.994602		1.74075	1.39055	23.3163	4.93612	1.69262e-39	-0.409595	0.778426
Glyma.01G040900	2.72681	5.72143	14.3228	1.92951	9.99626e-14	1.09578	0.00554701		0.235215	0.52357	0.938872	1.71524	8.02027e-05	0.972046	0.330187
Glyma.01G041000	0	0	1.19542	1.84577	0.684747	0	1		0	0	0	NA	NA	NA	NA
Glyma.01G041300	35.6518	36.4442	17.0108	-0.49161	3.62046e-06	0.0546683	0.866527		54.2234	48.7488	11.4048	-1.2451	7.37205e-17	-0.249967	0.360496
Glyma.01G041400	23.1465	17.7435	5.69562	-1.02482	2.32329e-07	-0.364397	0.246145		8.68676	9.91302	7.22867	0.393248	0.0536711	0.0973215	0.896742
Glyma.01G041500	11.066	9.38509	5.98823	-0.0432697	0.838312	-0.213176	0.621011		3.35798	2.96971	2.84273	0.807134	0.000661001	-0.281509	0.630032
Glyma.01G041600	7.96545	6.92836	2.34113	-0.957831	0.000210884	-0.187201	0.77142		16.406	17.4749	7.07752	-0.442492	0.0461701	-0.0100327	1
Glyma.01G041700	14.9873	19.2188	20.0179	0.672194	0.00101741	0.378426	0.337303		7.91279	10.5061	10.7894	0.904656	2.02948e-07	0.301315	0.422987
Glyma.01G042100	0.362942	0.0267508	1.46005	6.29088	1.22716e-06	-3.68383	0.0652187		0.0189402	0	1.03016	6.97333	2.62001e-07	-0.917536	0.896742
Glyma.01G042200	0.344007	0	1.50182	5.82835	0.000107285	-3.06568	0.285938		0.0514632	0	0.184305	3.40037	0.269954	-0.917537	0.949264
Glyma.01G042300	36.461	25.4014	218.297	3.71761	4.63426e-226	-0.498085	0.00208073		20.4482	17.5168	93.5572	3.27316	2.86961e-75	-0.320429	0.424594
Glyma.01G042400	25.4414	19.0599	24.5035	0.959374	1.79315e-09	-0.385836	0.136607		20.7482	21.0956	16.7168	0.527605	3.56508e-05	-0.073122	0.875198
Glyma.01G042800	15.967	12.8731	15.1534	0.849967	1.28615e-09	-0.288234	0.245983		22.3389	22.282	31.0927	1.3422	2.02628e-25	-0.106742	0.805804
Glyma.01G042900	9.14417	8.9603	5.98634	0.0334654	0.935932	0.00286969	1		2.28349	2.31129	1.11818	-0.183831	0.717635	-0.0942451	0.964275
Glyma.01G043000	4.30927	3.84459	1.44121	-0.816287	0.0310838	-0.152949	0.892334		5.76544	6.28325	3.25157	-0.110169	0.737429	0.0256156	0.993899
Glyma.01G043600	0.433223	0.0957817	1.52202	4.60999	0.000519538	-2.19461	0.41794		0.717754	0.751767	1.86058	2.18714	0.00187064	0.0164226	1
Glyma.01G043700	0.745235	1.39919	0.467292	-1.00553	0.152329	0.929909	0.502682		0.638019	0.876755	0.171635	-1.52544	0.0487832	0.399086	0.841796
Glyma.01G043800	31.7638	31.0239	18.9797	-0.0965522	0.590678	-0.0124189	0.992755		13.2498	13.8788	6.33857	-0.262162	0.142103	-0.0197897	0.986397
Glyma.01G044000	16.1095	11.3884	72.1645	3.27562	8.45557e-63	-0.483044	0.203155		44.9384	32.9534	149.457	3.04022	1.51733e-101	-0.535927	0.0111818
Glyma.01G044100	13.9002	11.7577	30.1266	1.97425	5.91944e-23	-0.210556	0.688447		9.27094	8.33229	9.21259	0.990656	6.70772e-07	-0.240182	0.64114
Glyma.01G044200	11.6396	7.07116	3.78037	-0.298345	0.317732	-0.682325	0.0947442		19.0279	11.0037	4.5654	-0.416228	0.13333	-0.889419	0.00525174
Glyma.01G044300	7.90409	10.2822	1.16816	-2.53178	2.07108e-25	0.39671	0.247527		4.11265	6.28915	0.833529	-2.09752	1.97757e-11	0.512543	0.247926
Glyma.01G044400	12.1116	16.3914	1.46925	-2.91236	0.00352509	0.482804	0.818623		1.86333	3.72708	0.397357	-2.37903	0.0957809	0.813452	0.799911
Glyma.01G044500	4.23809	4.11879	16.1821	2.56213	7.26217e-10	0.0032411	1		10.4962	13.3079	103.005	3.81365	5.78391e-73	0.246131	0.713073
Glyma.01G044600	44.5712	50.347	19.4913	-0.770831	1.54184e-06	0.203311	0.544763		22.4684	25.9451	11.0382	-0.36027	0.0267417	0.105847	0.833782
Glyma.01G044800	0.276149	0.10548	0.198225	1.49508	0.522301	-1.33933	0.841981		1.11502	0.380817	0.102136	-0.923846	0.530088	-1.68194	0.34624
Glyma.01G044900	19.1664	19.6292	25.4637	0.981609	5.46257e-19	0.0563672	0.883446		3.35582	4.69802	8.50009	1.72706	5.33621e-10	0.396903	0.577658
Glyma.01G045100	50.0751	54.4242	105.385	1.5634	2.54448e-59	0.142262	0.520473		9.93403	11.112	16.9142	1.46759	5.43381e-31	0.071501	0.890709
Glyma.01G045200	66.5925	68.2515	102.453	1.20649	7.39619e-10	0.0570183	0.939342		19.8813	20.5939	21.3876	0.927424	1.1275e-06	-0.046695	0.962302
Glyma.01G045300	20.0541	18.6665	5.37933	-1.19664	5.03859e-07	-0.0877841	0.904223		8.05407	8.37181	1.25105	-1.84495	1.51796e-08	-0.0310972	0.985367
Glyma.01G045400	13.3101	15.8956	0.396127	-4.68669	1.07515e-23	0.270261	0.581986		20.5273	26.861	1.09249	-3.78241	1.51341e-27	0.291318	0.414091
Glyma.01G045500	47.6687	50.8725	50.6502	0.606395	7.40101e-05	0.103125	0.82418		19.9687	21.2609	22.4228	0.937561	3.98546e-12	-0.0114436	0.997088
Glyma.01G045700	8.71755	7.59015	4.61692	-0.109138	0.633051	-0.180472	0.735855		9.57718	10.3926	4.42815	-0.359061	0.149998	0.0104437	1
Glyma.01G045800	12.1894	11.5594	6.67697	-0.193695	0.384258	-0.0411139	0.96095		8.05821	9.84091	2.29478	-1.21528	1.56021e-06	0.192636	0.762413
Glyma.01G046000	23.8412	17.833	1.08771	-3.43131	9.11618e-33	-0.401076	0.162652		10.5304	8.92619	0.751647	-2.70656	4.81796e-21	-0.332528	0.405258
Glyma.01G046100	0.405453	1.06788	0.940097	0.423371	0.643772	1.37855	0.518992		0.0897344	0.13524	0.133986	0.893298	0.650274	0.447217	0.962626
Glyma.01G046200	6.74837	5.58557	3.33405	-0.14875	0.631118	-0.239251	0.739211		14.9191	14.2711	9.07545	0.216928	0.321733	-0.156164	0.802002
Glyma.01G046300	2.24332	1.87515	0.0742176	-3.9088	0.0101875	-0.213434	0.95204		5.31194	3.3623	0.117773	-3.91487	2.2729e-05	-0.758139	0.226765
Glyma.01G046400	26.9184	26.4429	0.189909	-6.5391	3.66242e-22	-0.00927561	0.995356		22.3241	17.3947	0.345876	-4.69737	9.38597e-14	-0.461741	0.185058
Glyma.01G046500	15.3803	16.8697	20.1324	0.869591	6.21222e-07	0.151217	0.759075		8.18342	8.08735	12.7031	1.51232	1.08717e-17	-0.117197	0.863825
Glyma.01G046700	22.58	20.2004	7.24564	-0.869749	9.41198e-08	-0.136329	0.729388		14.1248	17.3076	5.95542	-0.676785	6.17059e-05	0.206849	0.574228
Glyma.01G047000	108.245	93.7103	14.2327	-2.11412	5.63294e-44	-0.186042	0.489127		442.229	404.405	67.6099	-1.71391	2.01425e-17	-0.224048	0.679947
Glyma.01G047100	24.0637	24.6551	44.562	1.45751	8.9978e-55	0.0617857	0.84293		13.0562	13.5722	28.249	1.91193	4.85678e-49	-0.0313215	0.965569
Glyma.01G047300	45.745	45.2638	39.2274	0.397934	0.0021479	0.00719816	0.995305		3.2609	3.7787	1.70614	-0.300324	0.558559	0.103777	0.962626
Glyma.01G047400	73.2707	76.521	59.686	0.246403	0.027293	0.0811317	0.794395		9.88195	12.6771	11.1925	0.681565	0.00425902	0.260368	0.687772
Glyma.01G047600	3.28186	9.42043	5.69182	-0.119881	0.881922	1.47753	0.321289		1.57293	1.65599	1.01918	0.10943	0.931118	0.0212147	1
Glyma.01G047700	28.7907	26.2913	51.0381	1.57076	2.07362e-44	-0.112195	0.716493		41.0602	46.7129	45.6432	0.826294	1.24978e-10	0.090357	0.843576
Glyma.01G047800	2.85775	1.26082	0	-3.44597	0.0381085	-1.19006	0.665295		1.01214	1.03412	0	-3.78538	0.0154658	-0.0911255	0.995525
Glyma.01G047900	3.91776	7.0811	3.16235	-0.55186	0.226073	0.863471	0.265754		6.62572	8.24285	1.05885	-2.15336	1.28233e-09	0.221037	0.765897
Glyma.01G048000	9.87506	17.214	0.456304	-4.63337	1.02402e-83	0.822487	9.16827e-08		4.22547	6.9296	0.507902	-2.86021	9.43618e-18	0.621298	0.131089
Glyma.01G048100	5.20266	5.06916	0.20952	-3.99305	2.1834e-06	-0.00716576	1		1.65469	1.13659	0.143243	-2.13599	0.008603	-0.656237	0.564674
Glyma.01G048400	0.611687	0.553001	0	-4.41231	0.00591433	-0.0605404	0.995295		3.25421	4.85914	0.096617	-4.57342	5.07182e-05	0.502925	0.646444
Glyma.01G048500	22.5828	21.0489	10.5601	-0.385347	0.00365496	-0.0828218	0.825368		6.5266	8.27249	3.5345	-0.378883	0.0585572	0.249059	0.557086
Glyma.01G048600	8.17864	8.43311	0.530672	-3.38618	6.289e-08	0.0621929	0.970633		3.10959	4.36002	0.347165	-2.74167	0.0001837	0.400077	0.766834
Glyma.01G048700	4.768	11.8213	5.07651	-0.585648	0.306797	1.32119	0.157579		4.05983	6.52598	3.36439	-0.106223	0.813832	0.577204	0.496672
Glyma.01G048800	1.41236	1.12005	0.675659	-0.166004	0.8555	-0.286446	0.9158		0.351277	0.550856	0.518119	0.804608	0.281662	0.526791	0.836421
Glyma.01G049100	40.1775	48.3318	6.32711	-2.33455	2.27218e-31	0.282427	0.383825		18.326	28.1105	5.53188	-1.47117	6.75651e-09	0.51642	0.222424
Glyma.01G049200	2.76951	4.99842	0.118817	-4.65097	0.000873445	0.868098	0.623727		0.275485	0.602046	0	-3.21484	0.0578737	1.03851	0.805804
Glyma.01G049300	6.54232	7.94996	0.131254	-5.15547	9.88589e-05	0.285567	0.879603		1.25375	1.45409	0.0805142	-2.96014	0.0566102	0.133619	0.98429
Glyma.01G049400	0.647598	0.878837	3.49837	2.5391	2.6603e-07	0.542852	0.728591		0.276102	0.335136	1.60309	3.13796	2.49989e-06	0.0995038	0.985823
Glyma.01G049600	6.81968	10.1707	0.0929829	-6.18796	1.23046e-08	0.597925	0.311244		3.34102	4.31619	0.059269	-5.24209	1.84097e-06	0.288971	0.784255
Glyma.01G049700	0	0	0	NA	NA	NA	NA		3.55585	2.89514	0.101786	-3.86269	0.00450462	-0.393347	0.859182
Glyma.01G049900	16.5244	13.5112	3.67936	-1.27483	0.0054218	-0.259715	0.817238		12.0735	9.28267	3.94046	-0.392812	0.247583	-0.47731	0.39036
Glyma.01G050100	93.448	74.3959	20.8649	-1.23938	1.56358e-14	-0.307278	0.23747		69.451	54.2145	55.8072	0.906082	6.78039e-06	-0.450315	0.207652
Glyma.01G050400	24.2566	30.153	12.3247	-0.669363	1.08815e-05	0.331424	0.174489		10.8622	12.2982	4.63125	-0.573618	0.00964244	0.0841532	0.915071
Glyma.01G050500	7.94893	7.62815	3.55032	-0.487729	0.142893	-0.0513525	0.969241		16.4561	17.1249	10.0194	0.0901644	0.686592	-0.0379883	0.970175
Glyma.01G050900	7.63891	8.53988	88.2991	4.00545	1.24654e-60	0.173855	0.846029		25.201	21.7549	247.195	4.36708	1.87563e-126	-0.304571	0.501746
Glyma.01G051000	0	1.15887	0	-4.03277	0.0509916	4.14078	0.224872		0	0.759417	0	-2.01808	0.568636	2.98163	0.761877
Glyma.01G051300	0.773126	0.258062	107.008	9.16074	3.38301e-22	-1.33061	0.585391		0.55451	0.357272	15.3623	6.29283	7.7254e-25	-0.743864	0.725174
Glyma.01G051400	68.5183	62.7128	59.3832	0.521384	1.43742e-06	-0.103624	0.704548		51.9165	53.1559	21.6687	-0.435754	3.7027e-05	-0.0611417	0.871995
Glyma.01G051700	21.9514	22.5248	0	-8.49925	9.10458e-12	0.0650197	0.963494		20.9793	25.1198	0.0886723	-7.19145	1.16135e-11	0.161136	0.779106
Glyma.01G051800	0.465864	1.39167	0	-4.66217	0.00341784	1.59346	0.535973		0.419465	0.965697	0	-3.92164	0.0279181	1.13753	0.793058
Glyma.01G052200	22.587	27.1135	16.8267	-0.0844678	0.587556	0.282513	0.26373		16.0414	15.5824	5.1215	-0.73338	0.00151339	-0.147024	0.825624
Glyma.01G052300	16.434	18.0621	1.35553	-3.15282	7.19149e-42	0.159619	0.728747		1.46478	1.71159	0.0717817	-3.85127	4.98293e-10	0.115056	0.923467
Glyma.01G052400	12.5934	13.6074	11.0042	0.310375	0.0976188	0.124513	0.820608		18.4622	20.6128	10.9557	-0.05664	0.832874	0.0674309	0.949735
Glyma.01G052500	11.7694	9.46432	4.06795	-0.611472	0.000819594	-0.291762	0.352996		4.21759	4.68847	1.47308	-0.76725	0.0175507	0.0476526	0.977235
Glyma.01G052600	9.26787	7.95302	19.1383	1.87271	1.19575e-46	-0.201662	0.494593		11.8557	10.8089	15.8908	1.4136	5.24599e-17	-0.241087	0.559611
Glyma.01G052700	1.93993	1.80738	3.93602	1.75108	1.45701e-05	-0.113996	0.945186		1.5081	1.06892	7.15748	3.60139	4.90539e-18	-0.615267	0.603577
Glyma.01G052800	8.6893	9.3484	7.30175	0.256491	0.237338	0.115968	0.86189		11.6201	13.7261	10.979	0.545214	0.00991784	0.14369	0.840464
Glyma.01G052900	1.30607	2.42954	0.0166076	-6.55169	6.73645e-14	0.915088	0.00289997		0.178519	0.192186	0	-2.23162	0.326422	-0.0610973	1
Glyma.01G053100	26.0931	27.5518	0.972476	-4.22859	1.4446e-60	0.0929227	0.844866		8.17704	8.92683	0.414681	-3.63555	3.14734e-24	0.0277347	0.985141
Glyma.01G053200	13.0625	15.8139	7.274	-0.50236	0.00376637	0.291831	0.352362		26.5408	24.9785	6.59024	-1.04458	2.41478e-06	-0.19089	0.706874
Glyma.01G053300	38.4588	43.3717	6.81052	-2.06846	9.70968e-50	0.192223	0.455445		20.4897	22.9563	4.84851	-1.37759	2.41459e-20	0.069754	0.884179
Glyma.01G053400	20.9317	22.3555	11.6928	-0.326332	0.00905132	0.111378	0.716773		2.12808	2.66257	1.33884	-0.151896	0.782454	0.239981	0.888829
Glyma.01G053600	1.80924	1.83904	1.91202	0.667648	0.0825269	0.046475	0.982105		0.362958	0.39669	0.415289	0.926012	0.247877	0.055869	0.999104
Glyma.01G053700	14.1337	10.4275	3.5482	-0.942614	6.65502e-07	-0.421276	0.104872		9.15608	8.19396	1.96128	-1.1758	5.8501e-05	-0.253939	0.674835
Glyma.01G053800	5.61455	6.30946	2.37733	-0.789988	0.00270969	0.18371	0.789496		3.13842	4.48861	1.95083	-0.365521	0.353463	0.415482	0.648959
Glyma.01G054000	7.48807	6.72418	1.93175	-1.20882	0.00577595	-0.11617	0.930963		10.7681	16.8563	7.96923	-0.228305	0.306146	0.546036	0.0802831
Glyma.01G054100	10.9725	9.11249	0.0929727	-6.00086	3.54792e-22	-0.248213	0.501625		7.16657	5.69305	0	-7.07256	1.15062e-08	-0.43668	0.485885
Glyma.01G054200	17.9706	20.6504	13.4133	-0.0201928	0.918309	0.218284	0.572409		16.7109	19.0263	16.5999	0.657647	0.000114648	0.0969325	0.87997
Glyma.01G054300	19.4027	18.2199	21.4213	0.845366	1.17773e-07	-0.067981	0.902213		10.6745	8.31152	8.71493	0.927532	1.28613e-06	-0.444011	0.159906
Glyma.01G054400	31.0178	30.7813	3.3174	-2.59339	1.23467e-31	0.0110412	0.994602		35.2091	33.9845	13.2257	-0.504736	0.0710715	-0.144894	0.885187
Glyma.01G054500	15.1536	15.9112	0.626383	-4.06251	3.86133e-41	0.0945154	0.855167		2.99207	3.57357	0.0484538	-5.43469	8.23651e-10	0.174486	0.844166
Glyma.01G054800	25.5627	27.3194	20.2844	0.176929	0.217534	0.117411	0.749792		6.04283	7.19976	8.64595	1.12849	3.52147e-12	0.17257	0.717897
Glyma.01G054900	9.55416	8.38399	0.500624	-3.45782	2.39373e-11	-0.163044	0.860403		1.737	1.44304	0.135687	-2.70041	0.000581407	-0.362807	0.797505
Glyma.01G055000	14.7002	12.383	14.3829	0.819681	0.000131668	-0.216932	0.688994		4.35534	5.96643	6.10619	0.907615	0.00397611	0.385627	0.645684
Glyma.01G055300	11.8637	11.261	9.70542	0.40056	0.00494827	-0.0528942	0.913173		7.99016	8.95685	5.91514	0.253288	0.271377	0.0808155	0.92567
Glyma.01G055400	31.0113	35.3442	61.9163	1.41495	7.61291e-17	0.211016	0.624848		27.0097	31.512	52.8764	1.60495	6.05953e-22	0.135088	0.814891
Glyma.01G055500	15.4821	11.113	4.86929	-0.583602	0.0133972	-0.458552	0.192849		21.4705	20.4816	4.61304	-1.29058	2.14584e-12	-0.163873	0.668014
Glyma.01G055700	28.6952	2.29679	12.6893	3.01434	NA	-3.62898	NA		5.77517	0.306892	4.98416	4.90587	0.000685658	-4.32739	0.0441232
Glyma.01G055900	9.66058	10.4446	10.0654	0.546238	0.0385064	0.14255	0.86649		7.1306	8.62499	9.90635	1.05554	6.42938e-07	0.161089	0.82661
Glyma.01G056200	1.11038	1.63803	0.216599	-2.31746	0.0510017	0.564477	0.835785		0.257103	0.424082	0	-3.28937	0.0430018	0.61343	0.891221
Glyma.01G056300	23.1864	22.0479	26.8767	0.894102	4.4785e-12	-0.0498342	0.913998		17.375	19.3895	15.573	0.541479	0.00143494	0.0534691	0.942888
Glyma.01G056400	0.935552	2.03791	6.1274	2.2121	1.90874e-06	1.11438	0.311057		2.01471	2.50806	3.17731	1.19649	0.00106405	0.228733	0.870315
Glyma.01G056800	2.97181	2.31895	11.9971	2.97232	7.34975e-47	-0.320357	0.53036		0.87343	0.690917	2.69187	2.81834	1.24573e-11	-0.434942	0.752409
Glyma.01G056900	0.951666	2.08399	0.69749	-0.946534	0.170225	1.15493	0.360274		0.673082	1.02206	0.320908	-0.798979	0.211608	0.510106	0.7384
Glyma.01G057100	79.1669	76.554	9.75658	-2.3709	1.72463e-48	-0.0248648	0.966931		52.0575	53.1253	8.75116	-1.73807	3.44652e-33	-0.0678577	0.887929
Glyma.01G057400	10.3298	7.6772	10.8564	1.11232	7.99583e-08	-0.402627	0.293767		11.3745	11.7066	11.8235	0.866596	3.88023e-07	-0.0404477	0.962626
Glyma.01G057500	29.7928	23.959	2.06715	-2.92749	3.87309e-64	-0.286272	0.178066		10.5105	8.7304	0.888641	-2.45779	3.3547e-13	-0.353145	0.393346
Glyma.01G057600	1.56619	1.90425	0.982111	-0.407953	0.630303	0.348547	0.891772		1.94521	1.20008	0.245783	-1.39825	0.0460062	-0.821529	0.39036
Glyma.01G057700	6.08806	8.05212	2.7883	-0.921013	0.000451197	0.413947	0.383727		0.915161	1.41269	1.00004	0.317116	0.6066	0.511994	0.759891
Glyma.01G057800	1.25163	3.22293	0.706235	-1.56142	0.00398424	1.36632	0.0825605		0.0400357	0.0306329	0	-0.0424726	0.994061	-0.732137	0.964556
Glyma.01G058000	39.0985	29.0007	6.9458	-1.46057	1.1676e-15	-0.40933	0.106866		100.27	92.6747	14.7524	-1.79988	3.99959e-45	-0.206614	0.311402
Glyma.01G058100	89.8151	94.2353	20.5907	-1.58831	7.593e-06	0.0819402	0.941704		48.1552	51.6802	8.38666	-1.76549	1.05914e-05	0.0128214	1
Glyma.01G058200	38.9527	33.853	7.06495	-1.66365	1.49697e-22	-0.184243	0.598552		26.5987	24.0203	2.53395	-2.34921	7.34477e-25	-0.240593	0.556674
Glyma.01G058300	15.9462	25.3784	11.1037	-0.584785	0.0105503	0.68949	0.0302402		61.9601	83.3298	14.5559	-1.64404	3.28819e-32	0.33505	0.0785414
Glyma.01G058400	13.1218	15.7306	0.099841	-6.6862	1.28085e-27	0.283447	0.325684		18.7542	22.4649	0.216529	-5.82656	2.3643e-24	0.160301	0.712393
Glyma.01G058500	59.3261	47.897	25.5413	-0.295156	0.0333535	-0.288017	0.191564		34.6194	27.241	18.6354	0.309638	0.0145431	-0.440251	0.00581199
Glyma.01G058600	4.54049	5.40767	10.9311	1.67126	0.0182185	0.240114	0.930484		0.336456	0.265714	1.13579	3.03187	0.0547764	-0.513019	0.948767
Glyma.01G058700	9.55936	12.3059	6.01693	-0.42577	0.0949871	0.38481	0.421536		1.6179	1.79491	0.788946	-0.309501	0.492184	0.049036	0.984832
Glyma.01G058800	1.42451	2.36001	0	-3.46619	0.0767386	0.72522	0.893393		0.293847	1.06563	0	-2.47301	0.228186	1.66473	0.772723
Glyma.01G058900	14.1158	5.85725	5.79448	0.592283	0.543389	-1.26728	0.471851		5.4036	4.11042	1.9384	-0.176106	0.854942	-0.474559	0.855837
Glyma.01G059000	8.20527	7.04215	4.57351	-0.0229943	0.953395	-0.195435	0.846417		1.19584	1.17814	0.892058	0.459857	0.396767	-0.11961	0.960994
Glyma.01G059100	30.3563	27.7032	26.2941	0.529889	0.000616763	-0.109171	0.808162		5.1531	4.67803	5.57654	1.12326	1.69015e-06	-0.217832	0.756935
Glyma.01G059200	11.2544	11.2595	4.42301	-0.744101	0.000160437	0.0195458	0.986234		7.4406	9.51235	2.00927	-1.36443	6.02482e-08	0.247051	0.646773
Glyma.01G059900	11.3784	11.7075	6.12367	-0.341765	0.114014	0.0697867	0.921117		2.3366	3.19451	1.42342	-0.323939	0.335743	0.344842	0.653411
Glyma.01G060300	7.99374	15.5092	0.505926	-4.30645	3.77576e-32	0.975097	0.000467599		3.32711	6.98138	0.45766	-2.92594	3.76998e-10	0.967864	0.0559705
Glyma.01G060700	30.8855	35.0456	28.9436	0.331119	0.000402819	0.203471	0.188994		14.0749	12.4955	11.1841	0.699305	8.89243e-06	-0.263926	0.412615
Glyma.01G060800	0	0	0	NA	NA	NA	NA		1.1072	1.6156	1.14121	0.331555	0.340376	0.429658	0.586885
Glyma.01G060900	19.5625	20.5594	6.16316	-1.12399	2.43712e-07	0.100251	0.87755		79.0031	86.8944	34.7329	-0.457103	0.00151814	0.0430042	0.945519
Glyma.01G061000	4.15825	5.91206	0.246043	-4.0369	7.07858e-05	0.544113	0.715925		7.15186	12.3788	1.09017	-2.60132	1.20293e-13	0.692567	0.0479916
Glyma.01G061100	39.0601	54.3429	1.89296	-4.2525	5.73174e-50	0.503839	0.0564435		39.0497	80.5004	2.55794	-4.07366	2.20951e-80	0.946855	1.52489e-07
Glyma.01G061500	27.8091	32.1307	47.1178	1.16021	1.92686e-60	0.231835	0.0254594		9.95731	12.4705	12.1656	0.818907	3.85625e-09	0.23417	0.439336
Glyma.01G061700	49.4733	53.7786	19.1452	-0.877991	2.85266e-20	0.141966	0.442914		22.0097	29.2783	18.497	0.196827	0.145377	0.316472	0.138799
Glyma.01G061800	14.3505	16.7298	4.15963	-1.40473	1.33878e-06	0.244782	0.720591		9.78058	12.4976	2.22424	-1.60736	1.21922e-13	0.259781	0.518946
Glyma.01G062000	30.4302	24.6479	23.5579	0.546635	3.63595e-06	-0.28049	0.138086		19.6387	20.3062	22.474	1.0045	6.05368e-13	-0.0431414	0.948378
Glyma.01G062100	18.3737	15.0319	0.334066	-4.89561	3.42698e-27	-0.267941	0.461885		17.3215	18.0075	0.551204	-4.16136	1.12846e-31	-0.0433962	0.952878
Glyma.01G062200	7.19324	6.16853	1.20147	-1.76207	3.85651e-07	-0.189093	0.815746		2.64247	3.31394	0.540192	-1.67999	0.000121781	0.24147	0.822313
Glyma.01G062300	14.4781	16.0726	5.22244	-1.0136	2.42539e-09	0.171533	0.642326		24.9571	22.5108	8.02762	-0.608918	0.0120101	-0.24308	0.682648
Glyma.01G062400	14.6567	7.42603	0.0407617	-6.92331	6.54315e-11	-0.95815	5.10645e-05		9.04623	5.06799	0.0920561	-5.15185	4.66409e-09	-0.928686	0.000982671
Glyma.01G062900	1.11105	1.02121	0.0505007	-3.68981	0.00303972	-0.0945649	0.978815		0.316849	0.368313	0	-4.59408	0.00082602	0.0973568	0.983506
Glyma.01G063000	31.7305	31.3702	8.9968	-1.19127	3.80945e-08	0.000769266	1		72.1081	70.8372	8.34887	-2.23563	1.48644e-24	-0.120828	0.872989
Glyma.01G063100	7.93961	7.29775	3.50052	-0.454166	0.10901	-0.092011	0.917738		6.02807	9.13547	3.88432	-0.380399	0.127518	0.527016	0.168934
Glyma.01G063500	0.788321	0.505736	0.0484936	-2.67957	0.105828	-0.571688	0.878604		2.87342	6.24184	0	-6.489	5.68169e-07	1.0231	0.282077
Glyma.01G063600	18.4799	21.6889	7.90367	-0.848801	1.36955e-20	0.252583	0.0532515		4.73737	5.0295	1.29053	-1.09779	9.52723e-08	-0.00875856	1
Glyma.01G063700	23.8085	27.0249	8.00045	-1.13684	8.63993e-11	0.204751	0.587658		8.45633	11.3445	1.83558	-1.77633	1.11125e-16	0.331611	0.276337
Glyma.01G063800	0.969484	1.37632	3.54021	1.92948	0.00259931	0.589627	0.771435		1.33126	1.30427	2.55467	1.82721	5.34776e-07	-0.134986	0.936987
Glyma.01G064400	17.3478	18.391	18.4253	0.620108	7.65382e-06	0.107224	0.788434		8.4138	7.97957	7.37433	0.738003	0.00044397	-0.163605	0.805696
Glyma.01G064600	12.1304	14.6593	2.67732	-1.84263	8.77626e-16	0.288666	0.467661		6.34654	8.80673	1.44125	-1.74942	1.832e-09	0.394745	0.409006
Glyma.01G064800	7.5249	4.41431	0.184858	-3.81222	0.0075362	-0.741328	0.69569		2.06225	1.93425	0	-3.60937	0.017129	-0.178118	0.972987
Glyma.01G064900	16.3912	18.2559	10.6384	-0.174409	0.312857	0.183259	0.629631		7.6708	7.51672	2.92057	-0.519257	0.01522	-0.116079	0.865683
Glyma.01G065100	17.566	17.7997	17.2497	0.563277	0.000189687	0.036792	0.948978		26.3884	27.9057	21.6472	0.499047	0.0019773	-0.015443	0.993575
Glyma.01G065400	4.57033	5.36387	2.29511	-0.608916	0.0397954	0.249971	0.729658		4.70819	5.64527	3.40904	0.122086	0.672539	0.180383	0.829581
Glyma.01G065500	18.1126	19.7837	1.58578	-3.03217	1.06004e-40	0.147	0.727022		1.47255	1.27043	0.105925	-2.83614	0.0188684	-0.340594	0.881756
Glyma.01G065600	21.4099	31.0824	2.12888	-3.25984	7.70109e-78	0.556148	0.0016715		0.676993	1.42676	0.15203	-2.20168	0.0548375	0.953316	0.649034
Glyma.01G065800	0.641058	0.302291	3.96562	4.34573	8.00344e-14	-1.04764	0.42334		0.0199745	0.0171992	0.566731	6.08813	5.33319e-06	-0.789599	0.905496
Glyma.01G066600	12.4465	10.9332	6.54602	-0.130811	0.553529	-0.174268	0.740252		14.1125	15.8358	7.29802	-0.266619	0.176174	0.0730168	0.914978
Glyma.01G067000	63.2032	56.6505	210.194	2.50511	1.09653e-99	-0.131943	0.666027		27.5837	26.5318	45.2196	1.62683	2.02796e-45	-0.144465	0.644558
Glyma.01G067100	42.4956	40.3502	9.17076	-1.51974	2.59322e-16	-0.0514849	0.93163		27.3464	27.1623	5.75826	-1.38032	1.36499e-19	-0.106569	0.786614
Glyma.01G067300	7.73707	10.5719	5.98172	-0.225531	0.383988	0.475704	0.273689		3.6253	5.82918	2.30821	-0.451082	0.240727	0.608501	0.363905
Glyma.01G067600	10.0337	7.40104	3.31239	-0.568449	0.0841889	-0.40707	0.520521		7.13745	7.59519	4.3834	0.0795801	0.763975	0.00815648	1
Glyma.01G067900	16.829	15.1328	6.3927	-0.640896	8.1662e-05	-0.133412	0.741541		22.8869	21.1352	3.52638	-1.71603	2.20896e-16	-0.215413	0.580634
Glyma.01G068000	74.6718	49.4319	26.296	-0.322707	0.0801179	-0.571329	0.0199577		89.1467	66.8788	23.1885	-0.663324	0.00026979	-0.50978	0.0601187
Glyma.01G068200	1.83816	1.43493	1.69296	0.850933	0.154428	-0.324729	0.861983		1.90819	2.35075	1.38274	0.0874923	0.841943	0.1912	0.890714
Glyma.01G068600	29.736	29.7218	24.8595	0.349499	0.0152969	0.0185813	0.980468		16.7583	18.002	9.21514	-0.107944	0.474218	0.0101435	0.998048
Glyma.01G068700	55.7451	48.6382	32.3528	0.0220948	0.938052	-0.174836	0.80188		8.48251	12.6896	5.2923	-0.420829	0.342111	0.480558	0.619332
Glyma.01G068800	22.3724	22.8106	21.6249	0.528482	7.28236e-06	0.0531936	0.893927		8.70006	8.37744	5.46771	0.24381	0.143688	-0.15205	0.719515
Glyma.01G068900	77.5047	79.0558	26.1934	-0.981047	4.78602e-10	0.0456108	0.93214		2.61626	2.90274	1.32922	-0.262446	0.576438	0.0583596	0.982939
Glyma.01G069000	0.431823	1.99571	14.8979	3.48541	9.30625e-07	2.11359	0.379985		1.19711	1.76181	15.7536	3.96023	2.87383e-18	0.649021	0.696349
Glyma.01G069500	26.2776	10.4696	64.5359	3.22874	8.93607e-119	-1.31207	6.37184e-17		11.8104	6.34199	24.8713	2.83627	7.47643e-79	-0.992651	5.71214e-08
Glyma.01G069600	8.98499	7.73701	7.73067	0.600871	0.0664598	-0.179721	0.861346		6.52904	6.83222	6.96218	0.903097	0.0237938	-0.0434669	0.990326
Glyma.01G069700	5.39716	5.18553	0	-4.67751	0.00186541	-0.0578846	0.994602		0.694627	0.868396	0	-2.70334	0.176546	0.210342	0.985141
Glyma.01G070200	4.06536	3.91049	1.40954	-0.854225	0.0035188	-0.0444591	0.969085		15.784	17.8269	1.90404	-2.37517	5.95872e-20	0.0817838	0.907108
Glyma.01G070300	6.1055	6.05279	5.17401	0.379141	0.0191075	0.0086987	0.995318		4.17057	4.72576	1.53728	-0.768026	0.00853171	0.0753968	0.948009
Glyma.01G070400	0.873898	1.27879	2.30313	1.45486	0.000225857	0.582258	0.527438		0.872671	0.799623	0.788799	0.824701	0.0916794	-0.206158	0.910836
Glyma.01G070700	63.7433	62.6394	37.6059	-0.142135	0.4025	-0.00119124	1		14.6898	15.3715	8.94925	0.0845401	0.651848	-0.0228192	0.983506
Glyma.01G071300	87.122	104.553	67.3172	-0.0198466	0.881777	0.286305	0.130679		143.842	175.077	223.245	1.2124	9.27183e-18	0.189268	0.595433
Glyma.01G071500	7.26883	6.68429	2.87829	-0.629287	0.0695845	-0.0993718	0.93046		1.89647	2.18153	0.463028	-1.46352	0.228236	0.171453	0.971207
Glyma.01G071600	0	0	0	NA	NA	NA	NA		3.29181	5.34308	1.95844	-0.563753	0.617161	0.575131	0.864928
Glyma.01G071700	11.1874	10.4203	0.770799	-3.13675	3.98205e-23	-0.0817491	0.912807		4.51268	5.49473	0.730415	-2.05734	5.21886e-12	0.195985	0.744307
Glyma.01G071800	1.49252	1.83631	0.154198	-3.01113	0.0321087	0.305816	0.928665		0.667713	1.07001	0	-4.05421	0.00697321	0.594623	0.864698
Glyma.01G072000	14.5865	13.5073	7.25448	-0.296649	0.352329	-0.0716045	0.948133		4.31227	4.38815	2.11608	-0.202553	0.511106	-0.0710617	0.953173
Glyma.01G072900	125.022	110.893	106.369	0.54105	9.51172e-05	-0.150841	0.648673		5.51804	6.95167	5.62616	0.569269	0.215059	0.255217	0.876675
Glyma.01G073000	66.49	55.4617	66.643	0.868835	2.64189e-13	-0.238586	0.256792		18.812	24.393	19.9769	0.571353	0.00119007	0.27568	0.472025
Glyma.01G073400	10.8859	11.8359	3.66953	-1.088	8.20663e-17	0.142186	0.641575		2.49483	2.48364	0.432899	-1.67872	2.92631e-05	-0.105538	0.928088
Glyma.01G073500	25.1026	28.7361	7.84589	-1.27064	2.25741e-23	0.218018	0.3461		2.54488	2.77071	0.61318	-1.32896	0.000293366	0.0254631	0.99545
Glyma.01G074000	45.4591	53.3983	68.3829	0.968032	2.44202e-51	0.253323	0.00325317		11.8948	10.5323	10.97	0.912089	3.30268e-11	-0.268728	0.309011
Glyma.01G074400	25.0325	27.895	19.6218	0.0998419	0.331505	0.180672	0.307207		13.9855	11.5124	5.2053	-0.314638	0.344199	-0.381658	0.556761
Glyma.01G074500	1.41454	2.28821	0.980104	-0.610169	0.107388	0.726369	0.252597		1.65113	1.79737	0.764886	-0.313767	0.550478	0.0222633	1
Glyma.01G074600	1.10164	1.349	6.53733	2.91928	1.33045e-09	0.278438	0.8872		1.13615	1.01829	5.22791	3.20315	3.29608e-16	-0.308365	0.846992
Glyma.01G074700	28.302	35.019	24.0888	0.0689756	0.445255	0.327676	0.00303333		24.3915	22.7895	4.7887	-1.38537	4.11376e-19	-0.191628	0.516937
Glyma.01G074800	6.88542	7.14691	16.7901	1.82591	2.13128e-17	0.0858955	0.916735		6.79357	6.97041	20.7833	2.43881	1.44902e-27	-0.0659603	0.958215
Glyma.01G075100	159.652	170.493	82.1058	-0.457201	0.0348418	0.11445	0.86189		4.32058	3.70096	2.04825	-0.0165161	0.984105	-0.320503	0.86793
Glyma.01G075200	59.1156	79.5545	30.8097	-0.776247	0.000914277	0.453285	0.246114		0.835745	0.646375	0.116846	-1.73722	0.308608	-0.401106	0.937358
Glyma.01G075300	75.2727	86.374	29.6681	-0.949237	6.31987e-06	0.219597	0.654456		3.20255	2.39109	1.39136	0.107726	0.868962	-0.512867	0.719515
Glyma.01G075400	22.318	25.359	22.7102	0.456644	0.00249521	0.205459	0.518098		14.5246	15.3334	7.74825	-0.1149	0.547217	-0.0161301	0.993393
Glyma.01G075500	0.877917	1.64524	0	-3.67328	0.0534228	0.923193	0.850479		0	0.193236	0	-1.2275	0.793396	2.19104	0.892
Glyma.01G075800	38.9968	37.3958	1.49044	-4.04585	5.20277e-107	-0.0357315	0.928557		31.5062	34.8167	0.904518	-4.31875	4.77211e-46	0.0479736	0.934458
Glyma.01G075900	5.31765	8.55326	0.266299	-4.39104	2.25366e-12	0.694049	0.196171		3.6896	5.72328	0.0778616	-5.24409	2.07009e-06	0.508306	0.545865
Glyma.01G076100	43.8186	47.6386	122.867	1.97715	2.09764e-110	0.142275	0.450392		3.73609	3.36097	21.7548	3.56313	3.75194e-69	-0.231494	0.726154
Glyma.01G076200	4.03985	5.29538	0.794944	-2.15189	0.0021957	0.395579	0.802537		5.10931	6.37683	0.737975	-2.21548	9.34251e-05	0.236357	0.873378
Glyma.01G076900	5.69324	4.40338	113.092	5.31061	3.77971e-176	-0.372571	0.361943		4.80102	3.14993	58.9635	5.07021	9.1861e-167	-0.678511	0.0345136
Glyma.01G077000	0.578383	0	0.0526922	0.958629	0.695652	-3.74445	0.279146		2.33209	1.34975	0	-4.57016	0.000705773	-0.913946	0.490292
Glyma.01G077100	1.2749	1.90803	0.112648	-3.46578	0.00619439	0.581159	0.787592		1.98775	2.16861	0.387036	-1.67083	0.0257642	0.0382633	0.9991
Glyma.01G077200	52.1305	48.4507	45.1749	0.498144	3.73395e-05	-0.0795869	0.825309		16.0738	18.3351	10.8075	0.0948647	0.480341	0.0936686	0.816316
Glyma.01G077300	35.5195	32.9231	42.8498	0.988882	7.77295e-35	-0.0875492	0.660725		16.03	14.8592	21.6174	1.39982	2.545e-37	-0.204497	0.377007
Glyma.01G077400	45.5318	53.4534	32.6209	-0.110998	0.304354	0.252679	0.114225		14.361	16.4215	6.38146	-0.493058	0.00146626	0.0960759	0.85004
Glyma.01G077500	0	0	0	NA	NA	NA	NA		1.34008	1.42381	0.260957	-1.62299	0.00617182	-0.00646343	1
Glyma.01G077600	14.78	13.4444	13.4565	0.617173	5.0064e-06	-0.115873	0.752983		12.1176	11.48	6.70033	0.0715498	0.719259	-0.168313	0.722309
Glyma.01G077700	1.80335	2.2525	0.632724	-1.21947	0.0766873	0.319711	0.868585		1.14991	0.949427	0.487325	-0.129243	0.86078	-0.401735	0.831944
Glyma.01G077900	19.8537	24.7289	11.4411	-0.499363	0.057824	0.324089	0.551329		11.9227	11.5977	8.2533	0.359983	0.111866	-0.131169	0.863185
Glyma.01G078000	2.6744	3.12025	1.38133	-0.610416	0.275739	0.260767	0.876575		2.16466	2.2463	0.936225	-0.405126	0.465265	-0.0681879	0.98085
Glyma.01G078200	4.63541	4.32357	83.6699	4.86737	7.05331e-52	-0.0338345	0.991698		2.92816	2.199	53.5696	5.44013	2.94672e-91	-0.402628	0.64092
Glyma.01G078400	6.72686	9.22965	12.6184	1.06139	5.10115e-05	0.486685	0.369711		4.46041	4.93059	4.2647	0.663745	0.00548815	0.0369416	0.979324
Glyma.01G078600	13.2806	10.8198	0	-8.32547	1.22658e-11	-0.262118	0.684766		11.3026	11.7825	0.0934019	-6.14699	2.39192e-12	-0.0478705	0.96637
Glyma.01G078700	0	2.00875	5.60621	2.13572	0.220408	1.99368	0.685071		0	2.4149	4.39956	1.73614	0.166251	3.8384	0.187227
Glyma.01G078800	3.28406	3.36361	90.7336	5.33528	6.47981e-44	0.106352	0.960353		10.8698	6.38847	148.322	5.40562	1.10355e-134	-0.860232	0.0139917
Glyma.01G079100	16.2525	15.6474	75.6526	2.89748	3.45072e-90	-0.0420084	0.941704		3.88324	3.36105	33.4169	4.16844	2.87201e-103	-0.30333	0.569253
Glyma.01G079200	22.2986	23.8872	46.5742	1.57333	6.24269e-22	0.114514	0.829689		7.40319	8.79694	9.71849	1.01108	1.41755e-06	0.166804	0.813535
Glyma.01G079300	16.2985	18.0804	44.5495	1.91341	2.76261e-53	0.167664	0.576537		12.816	13.2035	20.0456	1.45977	1.47597e-25	-0.0596133	0.919119
Glyma.01G079500	64.554	61.7205	92.8021	1.19385	2.1207e-24	-0.0444147	0.915992		15.9486	16.3672	16.7544	0.896485	9.48408e-14	-0.0596277	0.900431
Glyma.01G079600	17.8837	14.0247	2.24311	-2.06683	1.83781e-06	-0.326104	0.701534		7.09929	4.95707	1.70848	-0.70716	0.406873	-0.577591	0.754963
Glyma.01G079700	21.2111	26.9468	7.48645	-1.22913	0.0829635	0.356874	0.857737		1.57028	1.14243	0	-2.21036	0.274639	-0.557742	0.935662
Glyma.01G079900	1.69496	2.7956	0.241087	-2.97419	0.00898411	0.765614	0.71056		0.718497	0.823837	0.279482	-0.663435	0.472045	0.0762406	0.992107
Glyma.01G080200	46.574	40.9212	23.8938	-0.172374	0.210574	-0.167902	0.547019		99.8348	92.2383	24.3981	-1.04853	8.18488e-12	-0.209637	0.534086
Glyma.01G080400	7.4968	9.02568	2.59221	-1.19067	8.81005e-05	0.277678	0.678323		23.3213	21.9558	6.63104	-0.853403	0.000443047	-0.182288	0.766069
Glyma.01G080500	22.9862	27.698	210.815	3.5477	1.71402e-71	0.306406	0.52008		25.8002	25.26	129.022	3.21067	1.10639e-68	-0.122033	0.864831
Glyma.01G080600	12.7263	11.9351	2.6101	-1.57322	6.36658e-13	-0.0645617	0.924242		5.98313	7.42809	2.72896	-0.599687	0.0461021	0.218265	0.80218
Glyma.01G080700	45.1761	60.6734	34.0317	-0.226511	0.0080055	0.445793	6.77276e-06		21.3104	22.2566	9.40588	-0.376249	0.00799088	-0.0329427	0.957585
Glyma.01G080900	27.0678	25.9553	0.783303	-4.43644	3.08827e-43	-0.0414343	0.948036		33.1684	39.4247	1.55875	-3.72177	1.51121e-32	0.149174	0.753468
Glyma.01G081100	25.7978	26.6099	18.1738	0.0482908	0.813164	0.0727366	0.906136		11.0312	13.0111	6.7458	-0.085969	0.67967	0.13353	0.824304
Glyma.01G081300	159.757	126.771	28.0094	-1.57635	4.47329e-28	-0.308442	0.185624		121.398	90.7693	27.455	-0.859605	5.61351e-13	-0.514457	0.00040166
Glyma.01G081500	34.1644	33.1795	28.138	0.373189	0.000355028	-0.0229286	0.955288		96.0257	93.9027	52.6357	0.0261435	0.841524	-0.126641	0.673481
Glyma.01G081600	24.3337	23.5425	18.7401	0.280033	0.0446277	-0.0187824	0.978408		17.9481	20.7456	19.1839	0.748549	2.44092e-05	0.115684	0.857573
Glyma.01G081700	0.102961	0.307026	9.87449	5.62409	1.83212e-16	1.69257	0.527205		0.0796608	0	11.1939	10.1166	2.5643e-16	-1.7946	0.691296
Glyma.01G081900	4.97226	6.37228	1.40442	-1.58212	2.37287e-18	0.385909	0.135855		6.33208	5.15102	1.07288	-1.36759	4.16386e-05	-0.401026	0.434485
Glyma.01G082200	43.0638	37.2592	52.733	1.11457	1.88433e-35	-0.190549	0.232303		42.8613	41.6147	32.5101	0.504474	2.9101e-07	-0.139494	0.532748
Glyma.01G082400	70.4074	73.3299	138.64	1.53546	3.01624e-33	0.0841046	0.836384		24.5409	28.4068	43.7296	1.47977	6.7809e-13	0.115226	0.887067
Glyma.01G082500	6.39564	6.36316	3.58226	-0.217415	0.577717	0.02223	0.994602		2.94612	4.24981	2.89634	0.325295	0.471854	0.458541	0.68677
Glyma.01G082600	0	0.206372	0.569022	2.00993	0.263602	1.94977	0.702371		0.681525	1.16799	0.249853	-1.4111	0.245979	0.673891	0.82749
Glyma.01G082700	30.8578	31.6008	75.0927	1.85111	6.98328e-89	0.0587269	0.849797		9.59244	12.8125	17.6956	1.32738	4.54841e-15	0.323862	0.358523
Glyma.01G082800	18.8822	21.1623	63.0616	2.19329	1.79764e-33	0.178862	0.748548		5.31637	7.29539	11.0956	1.46892	2.68499e-11	0.377842	0.477606
Glyma.01G082900	56.1833	44.2297	114.199	1.99807	6.94136e-09	-0.337653	0.730276		1.9578	2.8765	4.28591	1.48551	0.180156	0.438996	0.92472
Glyma.01G083000	3.59938	2.20043	69.8635	5.62327	1.02028e-80	-0.715394	0.251704		2.73655	2.29106	42.8136	5.08435	5.104e-131	-0.335167	0.607634
Glyma.01G083100	4.81368	5.05041	0.0538399	-5.79585	7.99683e-06	0.0924318	0.964122		6.95285	5.19583	0.229326	-3.42467	3.00718e-06	-0.516207	0.460912
Glyma.01G083400	38.5663	53.6452	19.9297	-0.822037	1.10249e-09	0.498462	0.0038546		14.8051	16.0891	3.8488	-1.17476	1.37994e-05	0.0126195	1
Glyma.01G083500	69.2488	117.096	53.942	-0.49964	0.0175499	0.766404	0.00544078		1.9936	2.93452	1.82048	0.145295	0.864693	0.518584	0.836531
Glyma.01G083600	0.362694	0.244186	1.01891	2.58626	0.0827601	-0.486696	0.932227		0	0	0.0634785	1.8811	0.687412	0	1
Glyma.01G083700	4.25501	3.391	3.49384	0.650103	0.0264185	-0.319778	0.640446		1.41859	1.07516	1.89689	1.6871	7.44938e-05	-0.462917	0.700229
Glyma.01G083900	0.993295	2.08393	0.103904	-3.69264	0.0165357	1.10165	0.666649		0.68104	0.473508	0	-3.08367	0.0506215	-0.609377	0.87231
Glyma.01G084300	20.3427	24.6494	1.58773	-3.33829	1.23704e-33	0.294634	0.458815		1.7522	1.77839	0.10878	-3.2739	0.00638617	-0.0733883	0.986667
Glyma.01G084400	7.25866	8.69617	0.671768	-3.08602	1.13508e-27	0.281618	0.49213		1.75675	1.24486	0	-3.047	0.0577394	-0.588222	0.885302
Glyma.01G084500	27.1924	31.8003	7.71852	-1.44876	3.448e-13	0.2488	0.566242		7.09287	8.29123	1.5418	-1.55194	2.44872e-12	0.137782	0.809591
Glyma.01G084600	19.6881	18.7524	8.07355	-0.602267	0.00553163	-0.0437785	0.955636		13.2916	13.8918	3.22205	-1.25719	1.83581e-10	-0.0267303	0.977752
Glyma.01G084700	10.3001	14.2771	38.5873	2.05219	5.1316e-35	0.48206	0.0990543		15.8952	18.5163	58.4055	2.51236	1.75025e-63	0.120712	0.837002
Glyma.01G085200	2.00436	2.51269	0.0438808	-5.17307	0.000167944	0.337689	0.879939		0.659052	1.34641	0	-5.51625	2.8891e-05	0.937887	0.454098
Glyma.01G085300	11.9812	11.2213	3.23607	-1.18816	0.000931508	-0.0707736	0.951712		0.496475	0.871191	0.581803	0.333224	0.74149	0.763635	0.794208
Glyma.01G085500	14.6331	21.1373	2.16171	-2.68237	3.61165e-19	0.538188	0.169453		1.17465	1.48073	0.0741055	-3.37216	0.00410245	0.249952	0.905496
Glyma.01G085800	14.3406	14.3573	0.168351	-5.78629	5.84837e-14	0.0128471	0.995436		6.60931	7.90966	0	-7.72257	3.37017e-10	0.164252	0.853277
Glyma.01G086000	11.5355	10.0062	0.830668	-2.99411	8.38526e-36	-0.179601	0.647866		11.0775	10.2544	0.205337	-4.72787	1.00434e-13	-0.208521	0.745421
Glyma.01G086200	36.0079	52.1146	70.5016	1.04302	9.61813e-28	0.555468	3.82993e-06		1.98931	2.24527	1.33585	0.146465	0.704974	0.0759141	0.964677
Glyma.01G086600	21.4578	26.6948	21.4627	0.297369	0.000215652	0.335	0.001022		1.33546	2.13443	1.29517	0.136567	0.713249	0.604491	0.361117
Glyma.01G086700	27.1871	21.0567	42.7755	1.62421	5.5032e-17	-0.335425	0.389301		14.848	18.436	11.9964	0.238042	0.192125	0.214123	0.614358
Glyma.01G086800	2.4129	3.75554	0	-6.32967	2.6753e-06	0.677769	0.662791		3.9881	6.99227	0	-7.04086	1.61751e-08	0.716434	0.237278
Glyma.01G086900	2.62159	3.04963	1.72471	-0.235385	0.769917	0.203762	0.937888		4.01529	9.30004	0.717218	-2.8299	1.7858e-08	1.13266	0.016036
Glyma.01G087000	19.1033	18.9876	8.62404	-0.54882	0.0326328	0.00913322	0.998453		13.0297	10.0987	6.78431	0.300687	0.198856	-0.47	0.201799
Glyma.01G087100	28.7445	33.7473	14.2625	-0.663852	0.0342499	0.248762	0.761034		7.67752	5.8589	1.52007	-1.1067	0.0470297	-0.467347	0.69573
Glyma.01G087300	9.10093	9.51288	5.71369	-0.181133	0.78871	0.127326	0.958223		1.58743	2.71005	0.841228	-0.788555	0.377338	0.661746	0.772723
Glyma.01G087400	10.1294	14.7973	9.92677	0.0327642	0.901773	0.561831	0.15082		5.84594	7.65892	4.80642	0.193592	0.617087	0.296701	0.779589
Glyma.01G087500	27.309	23.2578	396.031	4.70821	2.48533e-160	-0.21285	0.649103		16.0407	12.2903	195.915	4.85787	1.58224e-102	-0.47622	0.30246
Glyma.01G087600	7.7834	7.31085	1.16237	-2.06338	2.29642e-09	-0.0649846	0.949754		2.02017	2.26445	0.180155	-2.69187	0.0303626	0.0389442	1
Glyma.01G087700	26.8117	27.559	22.8138	0.330338	0.00432411	0.064499	0.857968		14.4336	18.4517	8.86513	-0.192336	0.190039	0.263151	0.294177
Glyma.01G087800	24.3629	27.7436	34.317	0.934353	7.78741e-06	0.205468	0.707849		12.9457	13.7653	10.9895	0.530782	0.00807534	-0.00933012	1
Glyma.01G087900	16.3094	10.4979	158.893	4.53055	8.33033e-250	-0.602613	0.00150321		5.87521	4.62962	59.589	4.54405	1.51918e-149	-0.440718	0.216074
Glyma.01G088000	1.87057	1.77018	0.246347	-2.1997	0.159844	-0.0520049	0.996258		2.35947	2.74506	0.719549	-1.05078	0.149959	0.10683	0.97441
Glyma.01G088200	12.1282	13.3861	4.04189	-1.11879	1.09231e-08	0.153332	0.75339		18.3839	18.695	4.00995	-1.37252	4.9777e-14	-0.073426	0.896961
Glyma.01G088300	5.681	5.96062	0.0557536	-6.15622	1.59734e-08	0.0951249	0.934651		4.89746	6.5331	0.0584763	-5.85345	6.42367e-08	0.319642	0.672725
Glyma.01G088500	50.401	53.7578	9.91156	-1.83619	2.41481e-19	0.119036	0.814653		41.7375	63.2825	9.05667	-1.93627	7.3149e-13	0.50887	0.174857
Glyma.01G089000	25.6592	26.5711	21.3372	0.312457	0.162478	0.0753662	0.919186		8.77519	8.30603	6.70431	0.533604	0.102223	-0.179826	0.877448
Glyma.01G089100	20.6866	19.5649	30.6376	1.25364	1.363e-23	-0.0534067	0.905623		21.6917	22.9378	47.6484	1.91771	3.63843e-57	-0.0244342	0.97317
Glyma.01G089200	2.02133	2.48096	0.517371	-1.6942	0.103132	0.295976	0.922693		0.420137	0.470186	0	-2.87072	0.0975389	0.0611499	1
Glyma.01G089300	3.25384	2.44156	219.789	7.10487	0	-0.392956	0.261261		3.4364	2.44506	172.537	7.01082	1.98252e-223	-0.571695	0.182089
Glyma.01G089500	28.7811	27.0758	24.0635	0.428931	0.000709017	-0.0590942	0.888386		8.44636	9.61716	7.98854	0.595976	0.000432141	0.0797556	0.902173
Glyma.01G089600	11.0899	14.9576	9.85996	0.0191171	0.955109	0.448387	0.453171		4.49368	5.47838	3.79601	0.341332	0.274476	0.172587	0.870616
Glyma.01G089900	35.9905	34.6354	21.1768	-0.104849	0.389866	-0.0357178	0.929289		46.2683	47.2355	14.0487	-0.895224	5.78197e-13	-0.0664866	0.877554
Glyma.01G090100	18.224	22.0041	17.1048	0.244921	0.095906	0.293933	0.237595		5.4921	6.53697	3.62138	0.0115687	0.969835	0.163581	0.835633
Glyma.01G090200	19.9708	21.9056	0.080656	-7.49622	1.45651e-12	0.157224	0.785149		10.8708	12.455	0	-8.54074	2.42679e-12	0.1032	0.888111
Glyma.01G090700	2.34573	4.60599	0.0830117	-5.05262	0.000178755	1.01509	0.441699		2.56302	2.50227	0	-5.76139	8.80015e-06	-0.126236	0.957593
Glyma.01G090900	6.66481	11.0063	0.495056	-3.86788	2.16696e-09	0.739901	0.252571		19.5051	33.5559	0.360777	-5.61582	1.70026e-16	0.693359	0.0106631
Glyma.01G091800	1.14683	0.780387	0.259635	-1.04008	0.134357	-0.506714	0.743848		0.549382	0.56056	0.28003	-0.0650267	0.935801	-0.100891	0.978365
Glyma.01G091900	0	0	0.16831	1.91605	0.672488	0	1		0.902696	3.28868	10.2163	2.51851	1.46531e-06	1.56464	0.239723
Glyma.01G092100	11.2587	12.6283	13.6136	0.705594	0.000110004	0.194267	0.673054		6.88998	7.02958	6.64256	0.792504	0.0120943	-0.064347	0.968233
Glyma.01G092300	3.29403	3.81778	2.81319	0.14634	0.815963	0.244458	0.898683		78.8716	72.9606	2.85023	-3.82927	5.2736e-56	-0.206469	0.603316
Glyma.01G092400	41.3341	44.5821	26.8134	-0.129486	0.327311	0.132742	0.657455		16.2236	17.1956	6.20237	-0.603617	1.16149e-06	-0.0128789	0.989415
Glyma.01G092900	8.30372	8.75502	3.279	-0.816034	5.79909e-06	0.0970663	0.854081		1.74315	2.09696	0.789921	-0.560802	0.0979127	0.178458	0.871095
Glyma.01G093000	15.4554	16.6912	12.0466	0.14056	0.422553	0.127614	0.783481		8.25823	8.46	5.55376	0.261565	0.224605	-0.0636917	0.94191
Glyma.01G093100	8.63927	11.7591	8.55487	0.147677	0.458753	0.457031	0.134207		3.66602	5.28187	2.89246	-0.0225886	0.940813	0.433696	0.376589
Glyma.01G093200	18.231	26.4469	3.82397	-2.18006	4.48253e-44	0.553776	0.00556959		6.28978	7.57489	2.09434	-0.978909	0.00158179	0.177767	0.840796
Glyma.01G093400	0.848473	0.458877	32.0755	6.71029	4.30754e-43	-0.818747	0.520521		0.308495	0.408568	7.97174	5.10464	1.57352e-28	0.396359	0.868598
Glyma.01G093800	2.05786	3.13591	1.18443	-0.759017	0.503328	0.546902	0.867681		0.487318	0.556835	0.820406	1.49578	0.158998	-0.0355233	1
Glyma.01G093900	55.2336	61.7337	16.0497	-1.34522	2.33335e-27	0.183196	0.470566		4.12418	4.08036	1.0965	-1.01563	0.000403607	-0.124139	0.888292
Glyma.01G094200	76.1186	75.045	46.4814	-0.083607	0.295391	-0.000465315	1		26.4161	24.0189	11.4539	-0.211309	0.0611363	-0.232581	0.210037
Glyma.01G094600	6.70688	5.86442	2.26936	-0.770181	0.0679344	-0.159527	0.89705		1.18086	1.69539	0.522094	-0.918374	0.147557	0.42829	0.79374
Glyma.01G094800	23.5805	27.2069	30.4163	0.771612	5.29689e-19	0.228727	0.0982019		4.81962	5.66065	4.88263	0.655542	0.00345544	0.126616	0.880509
Glyma.01G094900	2.95284	3.64363	11.5275	2.29095	1.34789e-25	0.325823	0.55831		1.91201	1.64123	3.21476	1.78494	3.57579e-06	-0.269818	0.850937
Glyma.01G095100	26.6926	30.3494	23.1263	0.212757	0.176225	0.213437	0.507839		16.2599	15.7338	8.63402	-0.0201	0.927343	-0.139751	0.803531
Glyma.01G095500	9.26041	11.3959	12.3713	0.724377	0.037489	0.309032	0.735739		7.37792	6.77289	4.94239	0.419981	0.124359	-0.215664	0.785277
Glyma.01G095600	1.34049	3.29844	0.105053	-4.21912	0.0054014	1.28332	0.559929		1.18294	1.11604	0	-4.23276	0.00324109	-0.184925	0.963531
Glyma.01G095800	0.267219	0.149534	4.21839	5.478	5.57518e-05	-0.789203	0.888775		0	0	0.0999809	2.55923	0.576759	0	1
Glyma.01G095900	8.03408	4.75607	17.973	2.55847	0.0010009	-0.706475	0.751109		6.9823	3.8057	20.8577	3.33156	5.91421e-13	-1.00064	0.300743
Glyma.01G096000	12.9907	12.9248	201.243	4.57797	5.28509e-137	0.0300274	0.977378		13.6728	13.7271	120.843	3.99743	1.07527e-126	-0.0785095	0.916484
Glyma.01G096200	0	0.216445	99.1771	9.4976	7.15283e-15	1.07297	0.839844		0	0	147.295	12.8321	2.78403e-24	0	1
Glyma.01G096300	54.3748	49.9867	41.4319	0.337952	0.00121346	-0.102389	0.690236		43.4032	38.6762	24.5345	0.205127	0.0776395	-0.26463	0.136666
Glyma.01G096600	28.7061	25.4093	17.7347	0.09159	0.664712	-0.142713	0.793381		13.1538	12.1154	3.77098	-0.808376	1.98396e-06	-0.214778	0.502115
Glyma.01G096700	7.26336	7.32421	0.567249	-3.10188	3.47269e-17	0.0397082	0.972061		2.84363	3.44831	0.362559	-2.43353	0.000327152	0.202529	0.900946
Glyma.01G096800	1.972	3.39047	2.11883	-0.0579424	0.92336	0.773427	0.512378		0.964687	1.06571	0.762752	0.40891	0.490673	0.0531405	0.992941
Glyma.01G096900	1.35075	2.15693	1.33716	-0.116456	0.851444	0.719844	0.57662		0.0520722	0.0530789	0.0912023	1.80481	0.481415	0.0442598	1
Glyma.01G097000	12.7217	16.6654	2.75345	-1.9782	4.08829e-07	0.408535	0.569285		34.4543	39.7363	8.75862	-1.30254	3.20507e-10	0.114292	0.868812
Glyma.01G097100	19.301	13.1452	59.0443	2.77245	5.59034e-83	-0.526948	0.0163512		22.8351	19.5802	92.2222	3.09945	2.42796e-73	-0.313468	0.414318
Glyma.01G097200	26.3509	30.6025	39.4533	0.979327	1.33052e-19	0.233373	0.235483		24.2636	29.2611	20.1587	0.327904	0.0117729	0.17086	0.566715
Glyma.01G097500	11.168	11.1088	9.0783	0.319262	0.0502119	0.0120675	0.992755		14.8919	12.8698	6.47281	-0.14141	0.64619	-0.300905	0.650624
Glyma.01G097600	0.612946	1.48222	0.723017	-0.456343	0.6855	1.25866	0.626262		0	0	0	NA	NA	NA	NA
Glyma.01G097700	16.1686	18.7334	12.0105	-0.0398392	0.835472	0.239161	0.511494		8.02972	9.36595	6.00309	0.229184	0.318269	0.130567	0.863825
Glyma.01G097900	19.2642	21.7296	5.61206	-1.33684	2.9926e-10	0.190187	0.687204		9.26487	8.48918	3.01801	-0.630429	0.00186476	-0.22365	0.594386
Glyma.01G098000	98.2996	94.4678	37.4765	-0.723352	2.74838e-12	-0.0338341	0.922694		327.888	318.804	179.584	0.0323092	0.709355	-0.135678	0.376254
Glyma.01G098400	27.6359	24.986	3.75271	-2.11893	6.67379e-28	-0.126067	0.770498		18.7607	18.5885	2.39432	-2.10549	3.16175e-23	-0.111603	0.84985
Glyma.01G098500	1.5522	1.46295	0.488846	-0.870666	0.75822	0.0451977	1		0.680778	0.243432	0	-0.0424726	0.993818	-1.37105	0.905815
Glyma.01G098700	12.8443	13.4842	29.1064	1.73196	9.69417e-16	0.0871109	0.911892		23.1065	22.0674	41.401	1.76204	5.07627e-11	-0.156901	0.881331
Glyma.01G099000	28.9141	27.1831	0.837379	-4.4142	3.1789e-69	-0.0693186	0.876477		8.51374	10.9366	0.160529	-5.33869	9.54701e-15	0.259539	0.660812
Glyma.01G099100	16.9704	17.9406	4.59852	-1.35655	3.13631e-17	0.0990005	0.818124		14.8875	16.8968	5.73424	-0.69009	0.00209681	0.081422	0.919032
Glyma.01G099200	0.784333	1.07014	0.134037	-2.44499	0.0961631	0.529525	0.883025		0.669654	0.428441	0.0438076	-2.37361	0.12377	-0.734751	0.80519
Glyma.01G099300	0.669401	1.11608	0.236221	-1.5362	0.551419	0.729894	0.929051		0	0.113001	0	-0.0424724	0.994061	1.00602	0.962626
Glyma.01G099500	25.4969	38.5879	8.6217	-1.57074	0.00019807	0.628511	0.380875		1.85036	1.98194	0.580076	-0.84948	0.497468	-0.0411411	1
Glyma.01G099600	19.5293	20.5763	16.5089	0.291792	0.00753913	0.100392	0.717683		5.91332	6.70566	7.63488	1.03871	2.07331e-08	0.08681	0.906609
Glyma.01G099700	44.4722	44.2466	21.6549	-0.429355	0.000322351	0.0136818	0.98309		23.5843	27.4415	7.98294	-0.901571	1.30119e-05	0.124074	0.858811
Glyma.01G099800	1.68981	1.84752	0.137885	-3.13858	1.18732e-11	0.150884	0.882585		2.10183	2.87835	0.649641	-1.25556	0.00155691	0.365065	0.691698
Glyma.01G100100	13.7357	13.2525	5.18442	-0.73204	0.0080083	-0.0410474	0.971425		32.7101	34.7606	13.4766	-0.512192	0.0205789	-0.0115305	1
Glyma.01G100200	7.61743	7.85336	5.57249	0.113154	0.617346	0.0658952	0.929364		9.60214	8.67277	7.4532	0.631436	0.00999252	-0.232032	0.725505
Glyma.01G100600	10.864	13.6256	12.078	0.437871	0.0318042	0.339728	0.402156		8.57235	11.3694	6.71964	0.128577	0.685364	0.299118	0.697015
Glyma.01G100900	30.7361	25.4082	3.27954	-2.35783	1.31448e-44	-0.256615	0.362224		39.026	30.9879	3.95679	-2.08669	4.25957e-23	-0.430007	0.102483
Glyma.01G101000	14.4794	15.1345	1.82424	-2.44663	2.09187e-17	0.079529	0.916567		3.07992	4.13264	0.431464	-2.34837	4.37169e-10	0.323466	0.586069
Glyma.01G102100	0.97932	2.2001	0	-6.87038	1.04144e-07	1.17201	0.170735		0.638456	0.765511	0	-4.53273	0.0011694	0.16201	0.965647
Glyma.01G102300	0.208276	0.22841	6.35791	5.42721	5.7604e-06	0.111085	0.993845		0.689864	0.350072	7.46637	5.15921	3.88143e-22	-1.01291	0.457383
Glyma.01G102400	21.6152	19.7888	7.46244	-0.787276	1.25659e-05	-0.113352	0.81778		20.6441	23.1602	8.85203	-0.52491	0.00640977	0.0627075	0.926074
Glyma.01G102600	83.0101	46.7479	44.9219	0.550978	2.01959e-05	-0.805414	1.96173e-08		88.4966	75.3391	25.9743	-0.681183	1.58005e-08	-0.329704	0.0494272
Glyma.01G102700	31.4061	22.9507	49.121	1.73112	6.96042e-06	-0.446434	0.646134		24.4446	18.4442	27.1409	1.3946	4.57244e-07	-0.484498	0.397506
Glyma.01G102800	17.6795	18.2813	5.5982	-1.09782	1.25523e-09	0.0762952	0.889451		8.42273	8.52188	2.83902	-0.724571	0.0334463	-0.0915498	0.938258
Glyma.01G102900	0.748023	0.861884	0.0221997	-4.61291	0.000807432	0.192578	0.939401		1.59202	1.71534	0.0558065	-4.00023	0.000430158	0.0332607	0.998437
Glyma.01G103100	9.82698	8.95566	1.27556	-2.19132	1.35845e-14	-0.122706	0.87236		10.8069	12.0166	1.44364	-2.16978	1.15337e-13	0.0623336	0.945865
Glyma.01G103200	21.2106	21.896	17.0719	0.252568	0.111367	0.063422	0.902213		18.9603	21.3557	9.57653	-0.290461	0.126858	0.0779203	0.907508
Glyma.01G103500	97.7225	87.4346	21.6825	-1.40409	4.62754e-37	-0.134071	0.558953		49.4427	52.9532	13.5449	-1.1046	2.12376e-18	0.00334812	1
Glyma.01G104100	30.8351	30.3117	24.9293	0.3175	0.00705493	0.00414769	0.998635		15.8288	17.2603	8.12122	-0.210893	0.264704	0.0316542	0.972987
Glyma.01G104200	29.7448	38.8508	1.30196	-4.28545	2.57488e-79	0.40113	0.12488		14.2834	15.7845	1.16251	-2.85643	1.92049e-27	0.0480164	0.958321
Glyma.01G104600	19.9131	21.1349	0.332646	-5.35799	1.00743e-37	0.106183	0.827735		5.43017	5.9807	0.0459835	-6.39575	2.0753e-09	0.0546761	0.962567
Glyma.01G104800	4.78345	5.07435	33.2388	3.34146	3.62148e-43	0.0920338	0.930963		5.88992	3.70671	23.7411	3.54996	6.31308e-60	-0.765007	0.0255969
Glyma.01G104900	0	0.581561	2.45159	2.60556	0.131773	1.95015	0.698863		0	0	1.0355	4.36809	0.0294967	0	1
Glyma.01G105000	0.0770139	0.0820918	0.961511	4.18763	8.39478e-05	0.107743	0.992162		0.106139	0.101046	5.4797	6.50651	1.18676e-16	0.0493999	1
Glyma.01G105500	18.2025	15.3009	6.73288	-0.578636	1.27105e-05	-0.227275	0.312769		79.5475	77.4372	26.9018	-0.657029	2.46879e-06	-0.136782	0.709284
Glyma.01G106000	15.75	17.3644	0.997802	-3.52311	4.50371e-16	0.142044	0.883901		28.8644	31.2488	1.79112	-3.2262	5.16934e-33	0.0202941	0.987014
Glyma.01G106100	3.30313	1.74641	1.56297	0.41969	0.502252	-0.869045	0.434936		11.6999	11.5695	3.42188	-0.887498	0.00260839	-0.127013	0.892397
Glyma.01G106200	4.8108	4.10308	6.64756	1.29018	0.00172061	-0.202526	0.887712		13.7761	17.2564	12.204	0.358011	0.0956082	0.231057	0.669712
Glyma.01G106500	37.1565	34.978	0.754775	-4.94257	6.84138e-36	-0.0589435	0.917738		13.125	16.0361	0.283928	-4.98244	2.82955e-22	0.189209	0.688816
Glyma.01G106600	17.8663	13.6754	6.45792	-0.479376	0.000320277	-0.359974	0.0483852		14.61	14.3711	3.91564	-1.00069	8.89187e-09	-0.115518	0.811482
Glyma.01G106700	18.5185	11.0642	110.865	3.88495	4.47678e-32	-0.702094	0.294794		6.33502	3.14587	24.8828	3.86906	3.14284e-29	-1.127	0.0514763
Glyma.01G106800	0.126883	0.272036	0.0447543	-1.87959	0.37486	1.1054	0.851844		1.04023	1.65008	0.698801	-0.306004	0.713398	0.54763	0.80996
Glyma.01G106900	17.8233	20.5335	0	-9.95991	1.80604e-16	0.227615	0.512617		21.9349	25.2067	0.0567653	-7.84736	1.40533e-10	0.096958	0.901702
Glyma.01G107000	22.8189	27.0407	1.09153	-4.02391	2.52787e-11	0.269857	0.887049		4.96402	5.68418	0.332427	-3.1223	5.88588e-17	0.101307	0.909238
Glyma.01G107100	5.5329	7.65335	5.79366	0.201423	0.580745	0.482883	0.51696		8.24314	7.314	5.51193	0.457007	0.0539157	-0.265377	0.632964
Glyma.01G107500	12.1863	14.4636	3.89982	-1.27739	7.87743e-19	0.262593	0.264928		8.14526	7.62298	1.21325	-1.76025	1.83578e-07	-0.180853	0.814647
Glyma.01G107700	12.933	10.2639	19.109	1.49422	3.05634e-12	-0.301637	0.52815		2.40629	2.17721	2.71222	1.18141	0.00165715	-0.207298	0.885683
Glyma.01G107900	89.4884	77.5147	3.86054	-3.7262	2.51708e-130	-0.185186	0.379985		56.1423	70.6546	4.0509	-3.21673	3.28414e-62	0.237827	0.343821
Glyma.01G108000	11.7074	11.8481	3.11064	-1.2856	1.4852e-05	0.0353827	0.980972		11.9168	13.9742	4.56345	-0.781533	0.000628214	0.13251	0.857164
Glyma.01G108700	4.52091	6.44126	1.60077	-1.39831	0.000763352	0.53319	0.496124		18.7789	19.5794	7.1182	-0.598207	0.00552354	-0.0433997	0.963131
Glyma.01G109100	16.5567	13.2161	11.6939	0.431947	0.025149	-0.303057	0.410677		23.0783	22.9414	48.2266	1.93867	3.73272e-53	-0.108548	0.804972
Glyma.01G109200	13.3706	12.5741	1.26387	-2.69498	2.17732e-10	-0.0677305	0.951757		10.8358	10.853	1.88471	-1.63951	5.64823e-10	-0.0989276	0.896327
Glyma.01G109300	215.866	179.185	12.9127	-3.19176	6.56123e-138	-0.242822	0.154639		349.738	310.718	29.8817	-2.52101	1.60305e-150	-0.266678	0.037023
Glyma.01G109500	6.20231	6.76163	13.9688	1.65695	2.12068e-05	0.147763	0.922264		7.93154	9.37857	16.8672	1.72133	5.86485e-10	0.124553	0.915304
Glyma.01G109600	2.94885	5.26102	15.4085	2.16172	3.35639e-11	0.875715	0.172216		1.6202	4.21855	10.0621	2.12099	8.59585e-09	1.26562	0.0952823
Glyma.01G109700	20.8882	18.6105	3.12232	-2.01369	0.000676402	-0.140892	0.947969		21.2692	17.6116	1.35548	-2.81668	3.32512e-06	-0.364864	0.860076
Glyma.01G109800	5.40211	6.02307	1.24185	-1.64979	1.73852e-08	0.172402	0.81599		2.80245	3.39331	0.615558	-1.64149	0.000169902	0.189222	0.890663
Glyma.01G110100	2.45025	2.30998	0.600499	-1.31718	0.0109824	-0.0837623	0.963494		2.26446	1.70033	0.653285	-0.497719	0.303194	-0.490667	0.600347
Glyma.01G110200	19.7923	18.3428	2.54134	-2.2273	8.22304e-13	-0.0927805	0.907842		14.0695	13.353	1.90195	-1.91973	9.39318e-12	-0.178264	0.7914
Glyma.01G110500	14.2838	14.7058	1.63365	-2.56486	8.17997e-20	0.0630026	0.930122		5.98416	6.63907	0.648395	-2.4059	3.36892e-08	0.0537305	0.97412
Glyma.01G110600	7.99554	5.63642	0.334818	-3.48816	5.14213e-06	-0.489065	0.597319		24.2443	24.4476	1.14271	-3.57775	6.2846e-10	-0.0876986	0.943007
Glyma.01G110800	2.10012	2.33104	3.13765	1.00174	0.18615	0.187527	0.948314		0.109548	0.177704	0.439452	2.14935	0.100056	0.502101	0.937358
Glyma.01G110900	20.8584	23.1966	12.0209	-0.331992	0.0291071	0.169732	0.612729		17.3802	16.6492	7.93688	-0.20876	0.244146	-0.156323	0.712393
Glyma.01G111200	33.378	37.3515	36.4836	0.575799	3.20583e-13	0.182103	0.166591		13.7869	15.0769	10.7043	0.370488	0.00786306	0.0412068	0.947184
Glyma.01G111300	34.5307	34.2913	20.7513	-0.121575	0.227136	0.0145285	0.974158		22.6265	24.256	9.67474	-0.46557	0.000393158	0.00327232	1
Glyma.01G111500	8.10891	11.2097	3.0722	-1.24396	0.00368478	0.475379	0.590112		1.61567	2.0091	0.737378	-0.529566	0.37861	0.179427	0.933706
Glyma.01G111600	1.06211	2.41587	0.488287	-1.72626	0.231513	1.13673	0.729696		4.48267	4.87655	0	-5.00105	0.000199612	0.0495126	0.99755
Glyma.01G111900	40.9983	33.8619	0.447953	-5.66174	7.74422e-28	-0.246663	0.538037		23.5718	27.5296	0.161304	-6.37307	1.6344e-28	0.128913	0.805443
Glyma.01G112200	3.20408	5.30367	0.583737	-2.54496	1.30396e-15	0.741062	0.0618922		0.941941	1.64457	0.130197	-2.90759	3.02884e-06	0.698172	0.360396
Glyma.01G112300	3.39573	4.35823	2.29688	-0.301676	0.316352	0.372876	0.545161		0.43775	0.567174	0.395264	0.331356	0.541616	0.262933	0.887803
Glyma.01G112600	0.788666	1.32539	0.742407	-0.22658	0.697048	0.777818	0.505515		0.507066	0.635844	0.682828	0.939528	0.104907	0.229172	0.921018
Glyma.01G112700	2.05837	2.50134	2.1554	0.412582	0.390538	0.299924	0.835526		2.01152	1.65831	1.68569	0.885018	0.0687857	-0.36792	0.805804
Glyma.01G112900	8.46378	8.07592	21.877	2.04481	9.95102e-20	-0.0416048	0.970898		11.4849	13.8082	21.3139	1.48273	3.29651e-16	0.168055	0.77344
Glyma.01G113000	17.0045	14.8401	11.1094	0.187559	0.236537	-0.171289	0.623675		22.9779	21.7793	20.4297	0.770126	3.9783e-10	-0.170504	0.554224
Glyma.01G113100	2.34282	3.91606	8.05051	1.64833	0.000793473	0.754181	0.558607		2.66281	3.37527	9.83807	2.40155	3.21614e-13	0.278931	0.826031
Glyma.01G113200	11.7544	10.6101	10.9546	0.666059	0.00291823	-0.122846	0.863327		15.0157	11.319	11.244	0.861906	9.91144e-07	-0.512974	0.0449519
Glyma.01G113400	5.01269	4.38162	0.342692	-3.02925	4.01735e-08	-0.176679	0.880274		0.534947	0.205135	0.160175	0.548509	0.738183	-1.54621	0.661549
Glyma.01G114000	7.19859	7.83875	26.0493	2.34212	5.65121e-69	0.143356	0.713905		4.27456	5.9497	18.1536	2.47386	8.99685e-30	0.375625	0.487158
Glyma.01G114300	1.16387	1.23058	0.855686	0.0358471	0.983986	0.102718	0.992908		0.247124	0.346086	0.0769198	-0.958314	0.676016	0.263483	0.983899
Glyma.01G114400	6.58799	5.90148	10.9789	1.50578	9.76572e-08	-0.148253	0.883674		1.59802	1.66157	4.94562	2.41601	9.53052e-18	-0.0418811	0.985141
Glyma.01G114500	6.03422	6.17482	0.49447	-3.04642	9.34986e-14	0.0794885	0.942514		0.770964	0.795982	0.0442932	-3.10039	0.0104397	-0.0213266	1
Glyma.01G114800	24.0808	27.3987	19.432	0.109099	0.676084	0.213926	0.736868		83.8046	93.2645	97.47	0.924016	4.85558e-15	0.0595834	0.898985
Glyma.01G115000	20.101	24.5372	10.184	-0.657464	1.73721e-05	0.3117	0.207524		12.1897	17.9222	7.12802	-0.463319	0.0108712	0.468742	0.0720735
Glyma.01G115500	6.24747	4.92846	0.143726	-4.48755	1.43418e-06	-0.325391	0.758393		18.2728	18.7534	0.367381	-4.86747	9.0704e-17	-0.0673732	0.938356
Glyma.01G115600	16.1941	10.1822	0.642203	-3.34038	2.89683e-11	-0.65403	0.159853		5.48563	3.42002	0.1389	-3.68708	2.31771e-07	-0.776057	0.0669302
Glyma.01G115900	361.533	295.409	1865.43	3.26401	1.08175e-303	-0.264429	0.0468664		664.997	646.364	4328.31	3.60252	0	-0.133282	0.55895
Glyma.01G116000	28.1353	22.5049	38.0245	1.36472	2.55933e-17	-0.296425	0.34539		74.0189	85.1786	78.9959	0.751823	9.15016e-09	0.105826	0.804457
Glyma.01G116100	10.1981	8.76193	5.63142	-0.0376406	0.873626	-0.201715	0.695493		15.3018	16.3092	21.9331	1.29013	9.80246e-16	-8.11467e-05	1
Glyma.01G117000	0.0872905	0.159413	6.46645	5.77818	9.03042e-13	1.09798	0.757752		0	0	0.419417	6.44299	6.11729e-06	0	1
Glyma.01G117200	1.245	1.33224	4.81664	2.46323	1.2008e-09	0.110651	0.950139		0.142806	0.169346	0.355362	1.99551	0.0232455	0.11863	0.986108
Glyma.01G117800	31.6736	27.5375	3.00933	-2.58921	4.13419e-47	-0.18048	0.550841		19.6636	19.2158	1.3076	-2.96236	3.66055e-38	-0.129234	0.765207
Glyma.01G117900	2.83611	3.12718	8.48514	2.05302	1.10008e-27	0.148875	0.812409		0.919671	0.873875	1.18055	1.31233	0.000167276	-0.202675	0.880497
Glyma.01G118000	0.991077	1.70113	0	-5.98522	9.73289e-06	0.830991	0.581088		1.00033	1.40483	0	-5.70859	2.47257e-05	0.346556	0.885778
Glyma.01G118200	12.4158	10.6939	5.46728	-0.35837	0.0436404	-0.197066	0.601206		11.6754	11.2684	6.42194	0.0548416	0.799396	-0.145274	0.791662
Glyma.01G118300	31.3624	31.3501	12.1862	-0.755136	4.47066e-21	0.0214835	0.940667		8.13948	9.18964	2.1135	-1.27196	1.08419e-05	0.0991116	0.918718
Glyma.01G118400	44.8548	48.5055	16.7398	-0.933597	3.79995e-20	0.137282	0.523115		8.26384	9.9023	2.85405	-0.934685	6.61664e-06	0.17217	0.743027
Glyma.01G118500	0	0	0	NA	NA	NA	NA		0.622371	1.28138	0.196031	-1.95829	0.281663	0.984562	0.845528
Glyma.01G118600	0	0	0	NA	NA	NA	NA		0.956419	1.66463	0.550033	-0.686651	0.524131	0.753058	0.787193
Glyma.01G118700	43.3199	47.4747	19.0042	-0.734744	0.0545133	0.144556	0.902179		3.79897	3.83643	1.65645	-0.444762	0.684153	-0.113796	0.985141
Glyma.01G118800	48.8529	62.6496	35.7257	-0.206877	0.018979	0.380029	0.00039219		23.7716	32.8329	11.2568	-0.684952	2.73944e-06	0.375172	0.0790758
Glyma.01G118900	38.9821	48.0765	12.1468	-1.38507	1.43245e-29	0.323473	0.0832173		13.9789	15.2342	3.62184	-1.20047	2.25043e-11	0.032191	0.969461
Glyma.01G119000	48.5014	72.0569	27.0818	-0.799417	4.11412e-05	0.582733	0.030899		1.42542	2.17365	0.386293	-1.63177	0.0233826	0.491068	0.758772
Glyma.01G119100	7.62662	8.73629	4.92517	-0.208283	0.590795	0.209431	0.849073		10.9107	13.4954	4.90876	-0.629152	0.22389	0.228548	0.891043
Glyma.01G119300	3.94699	2.58798	0.378333	-2.1302	0.000472601	-0.589244	0.530984		11.7496	14.7841	7.0356	-0.192984	0.499162	0.240203	0.744312
Glyma.01G119400	143.939	184.164	39.2877	-1.60762	8.32364e-25	0.374345	0.129726		45.2778	36.1117	5.02924	-1.98128	1.3277e-33	-0.422876	0.0100467
Glyma.01G119500	32.578	21.1874	122.258	3.13635	1.87146e-150	-0.593082	0.000113055		18.5272	15.954	38.3901	2.12345	2.72773e-55	-0.311999	0.224778
Glyma.01G119900	13.401	12.2969	7.01478	-0.207232	0.451002	-0.0956763	0.910508		17.2772	16.7547	17.7677	0.944093	9.6464e-09	-0.138168	0.79046
Glyma.01G120000	0.0830041	0.413589	17.3823	6.01548	1.47486e-23	2.28629	0.291595		0	0.0742412	1.49118	5.13899	1.24684e-10	3.19967	0.22308
Glyma.01G120100	0.103973	0	1.74143	6.56463	1.70119e-06	-1.75385	0.673042		0	0	0.0348598	2.69637	0.472787	0	1
Glyma.01G120300	0.0608144	0.130386	2.5054	4.81936	4.57452e-08	1.10765	0.765702		0.0307002	0.0127011	0.342092	5.31727	0.000418008	-1.31228	0.819127
Glyma.01G120400	27.9198	17.6282	11.5374	-0.00449043	0.983131	-0.636489	0.0014837		18.6778	13.068	11.4911	0.670958	0.000316496	-0.610619	0.016183
Glyma.01G120800	0.865031	1.59012	1.18742	0.207871	0.792364	0.863424	0.633687		0.760701	0.670364	0.882866	1.23935	0.0838404	-0.290944	0.91672
Glyma.01G121200	2.74508	5.7647	0	-6.8834	7.81182e-08	1.09065	0.180416		1.09866	2.04345	0	-5.85078	6.43206e-06	0.802646	0.475415
Glyma.01G121300	12.0692	12.3768	13.9308	0.778984	2.7652e-07	0.0595833	0.912965		10.3118	9.56985	7.72876	0.550658	0.00539294	-0.192714	0.713859
Glyma.01G121400	26.4201	24.8941	24.654	0.591606	3.37958e-10	-0.0623424	0.828003		12.7839	12.5823	8.53621	0.296009	0.0382449	-0.118532	0.777249
Glyma.01G121700	24.0181	20.2391	211.349	3.99063	5.31465e-160	-0.233417	0.53036		13.2525	15.199	63.7	2.92518	1.59379e-88	0.112903	0.849035
Glyma.01G121800	2.61075	0	0	0	1	-2.37438	0.824596		0.891299	4.34939	0	-3.82234	0.0490985	2.09993	0.613369
Glyma.01G122000	0.414983	0.454954	54.2593	7.52905	4.23299e-52	0.112082	0.971006		0.070417	0.187864	15.7263	7.34553	3.74577e-19	1.07758	0.806197
Glyma.01G122100	16.2119	15.5899	23.0625	1.17541	1.07193e-29	-0.0328707	0.933659		14.4945	18.271	16.1078	0.673932	0.000264381	0.227794	0.627862
Glyma.01G122300	31.8789	31.147	48.6995	1.24437	5.5096e-18	-0.00857334	0.995045		3.3939	4.88425	4.45682	0.7352	0.0276338	0.416457	0.618499
Glyma.01G123300	22.2438	22.1834	26.5415	0.86982	7.15479e-15	0.0200926	0.968144		19.8255	21.0957	12.8341	0.152154	0.359738	-0.00304053	1
Glyma.01G123400	1.5503	1.60413	0.519382	-1.00834	0.03212	0.0477962	0.984402		1.68055	1.98745	0.340915	-1.74351	0.00242153	0.162429	0.918716
Glyma.01G123500	0.22358	0	38.7747	8.87206	8.77785e-13	-0.850612	0.882741		0.179947	0	8.36229	8.44954	2.07249e-11	-2.35309	0.497447
Glyma.01G123600	0	0.0884366	9.382	7.38124	4.75091e-09	1.07297	0.842398		0.0683565	0.0376945	2.50344	6.6183	5.27428e-07	-0.80842	0.902753
Glyma.01G123700	0.0259384	0	1.60355	7.15753	1.07144e-07	-0.85061	0.8872		0	0	1.89601	6.46208	0.01716	0	1
Glyma.01G123900	14.0224	15.0654	16.4415	0.732855	2.13205e-07	0.123772	0.754361		4.64545	4.80727	3.31597	0.317722	0.134831	-0.0451611	0.96388
Glyma.01G124000	2.4742	2.75986	9.1871	2.30387	6.15891e-07	0.221152	0.902868		0.426212	0.418023	1.20304	2.43545	0.00108882	-0.100741	0.987111
Glyma.01G124100	5.07009	4.27074	0	-8.06734	5.51491e-11	-0.221871	0.763871		3.2062	3.7345	0	-6.10103	2.41572e-06	0.140549	0.950386
Glyma.01G124200	11.5589	10.6595	2.56839	-1.44447	7.6648e-13	-0.092094	0.873917		12.2157	11.8469	4.21563	-0.619127	0.00148007	-0.135663	0.8026
Glyma.01G124300	31.6858	28.1876	2.61861	-2.8375	6.0152e-31	-0.148551	0.762197		79.2326	67.2285	6.75387	-2.44366	1.80983e-24	-0.333242	0.472025
Glyma.01G124500	16.4807	5.94711	2.52269	-0.700663	0.555416	-1.44623	0.538232		29.0386	26.6539	5.11316	-1.51441	2.74024e-05	-0.218935	0.857164
Glyma.01G124600	14.8306	15.0074	27.0508	1.44918	3.62451e-09	0.0544499	0.959147		12.5227	15.1288	31.2091	1.8944	1.0586e-18	0.178576	0.820477
Glyma.01G124700	15.7916	6.12751	35.569	3.15859	3.17405e-20	-1.35231	0.0039729		8.94348	4.22503	28.8415	3.63839	1.73553e-37	-1.17702	0.00291372
Glyma.01G124900	22.6603	22.6813	12.404	-0.255432	0.110851	0.0159303	0.986369		89.7947	88.6813	27.868	-0.811738	2.49914e-13	-0.114405	0.659382
Glyma.01G125000	11.6955	11.4051	0.735074	-3.36071	6.50187e-20	-0.0228633	0.990045		6.37727	6.0547	0.16261	-4.23179	5.75441e-11	-0.169462	0.846078
Glyma.01G125100	8.42933	8.99717	4.98071	-0.237076	0.351489	0.112605	0.885717		10.1119	11.6599	5.15187	-0.301624	0.252282	0.0908613	0.923387
Glyma.01G125200	4.19176	4.52147	0.67954	-2.12336	2.82516e-09	0.117563	0.900723		2.16367	2.08015	0.261292	-2.17492	2.81966e-05	-0.15692	0.900946
Glyma.01G125600	14.1227	13.7739	13.1724	0.541373	0.000171991	-0.016226	0.985181		16.405	18.047	6.07	-0.710493	0.000109887	0.0303403	0.972864
Glyma.01G125800	55.8244	48.4122	0.0582195	-9.106	2.89415e-18	-0.184837	0.456042		17.6899	17.5475	0.0773194	-6.85221	2.7366e-24	-0.105512	0.854321
Glyma.01G125900	8.58483	6.19671	5.09034	0.300044	0.494528	-0.414068	0.671503		63.0744	63.1966	24.0609	-0.541052	0.000465481	-0.0906812	0.864829
Glyma.01G126000	6.75842	6.60993	2.60025	-0.725984	0.0179697	-0.0234007	0.99145		21.2619	20.9956	14.3927	0.319017	0.119539	-0.109965	0.881356
Glyma.01G126200	2.72818	2.4144	4.93859	1.62524	5.69215e-06	-0.145061	0.912598		1.81842	2.83004	3.15711	0.995464	0.0596057	0.600408	0.691145
Glyma.01G127200	0.444061	0.13907	1.03172	3.21433	0.0529463	-1.36939	0.780333		0.625146	0.416578	3.83628	4.04877	3.77993e-09	-0.482032	0.87231
Glyma.01G127300	12.9173	12.2697	0	-5.99811	9.06724e-06	-0.0668209	0.986369		3.2144	4.05348	0	-4.47768	0.001632	0.231876	0.949924
Glyma.01G127400	13.1724	17.3943	0.632817	-4.16327	1.4655e-12	0.42559	0.512337		22.4214	33.7783	5.54744	-1.73614	3.04187e-17	0.501324	0.0598081
Glyma.01G127500	48.3186	42.4227	0.835146	-5.06373	3.65579e-57	-0.160333	0.608455		33.6433	39.5549	0.665631	-4.94788	2.07093e-64	0.137558	0.656614
Glyma.01G127900	0.92907	1.38969	18.6975	4.33005	5.37723e-37	0.661586	0.51652		2.03474	2.12505	11.5476	3.33056	1.72744e-25	-0.0471192	0.986442
Glyma.01G128100	1.40325	1.59277	9.63331	3.23745	1.13888e-13	0.197548	0.907842		0.553603	0.758074	1.87019	2.18876	2.79817e-06	0.270016	0.895663
Glyma.01G128200	23.4522	20.9167	27.7913	1.01459	1.02137e-14	-0.143745	0.66149		8.6571	8.73778	10.1727	1.08101	1.4163e-13	-0.0818417	0.88668
Glyma.01G128500	12.7686	12.1974	5.86679	-0.4488	0.0260682	-0.0462696	0.947969		30.8986	32.232	8.206	-1.11154	7.67158e-08	-0.042795	0.960565
Glyma.01G128700	46.5566	50.3412	43.9803	0.412344	2.27572e-07	0.135017	0.386447		8.87756	10.0197	12.9714	1.22975	8.78392e-29	0.0807394	0.841535
Glyma.01G129100	0.360103	0.0775878	2.07393	5.3224	0.000458525	-2.10643	0.553889		1.15786	1.93771	6.8624	2.66936	1.96514e-08	0.692002	0.621665
Glyma.01G129200	1.45851	0	0.437511	1.84798	0.508194	-3.04532	0.58091		0.811141	0.328646	1.63594	3.19099	0.00999563	-1.38124	0.694697
Glyma.01G129400	9.28947	10.0006	255.403	5.29313	5.38557e-189	0.131463	0.825071		7.16881	7.92989	82.4858	4.23103	1.20752e-161	0.0621141	0.938258
Glyma.01G129700	9.37256	15.7485	0.248189	-5.36849	3.60921e-14	0.760031	0.0909069		14.2773	17.1542	1.55338	-2.60745	1.14707e-15	0.160103	0.819
Glyma.01G130000	3.13191	4.33883	0.290814	-3.31292	2.33048e-08	0.498169	0.578808		15.1799	11.5354	2.15409	-1.5166	0.00449524	-0.500945	0.683905
Glyma.01G130400	42.8898	26.9561	0.418205	-5.40143	1.27252e-09	-0.64406	0.139252		3.54898	4.09082	0.109051	-4.01667	0.00308792	0.0709205	0.989419
Glyma.01G131200	2.03943	2.00063	1.23266	-0.0824465	0.931799	0.00479675	1		8.71341	11.1282	4.22611	-0.540996	0.0528811	0.258977	0.701895
Glyma.01G131300	59.4556	58.6705	2.05366	-4.22731	2.12767e-76	0.00140718	1		40.6738	43.4199	3.03246	-2.99516	1.77499e-54	-0.000789724	1
Glyma.01G131400	2.41678	2.42557	0.0208259	-6.11186	1.40946e-06	0.00920486	1		2.69432	3.59839	0.0471567	-5.51066	1.24964e-05	0.316749	0.77839
Glyma.01G131500	27.7753	32.0605	17.7994	-0.248404	0.122934	0.227998	0.467449		11.3515	14.6083	4.88012	-0.716077	0.00059276	0.27126	0.540679
Glyma.01G131800	16.5832	16.5399	13.5814	0.325741	0.126765	0.0211033	0.987195		4.15063	4.11179	3.18318	0.473264	0.0620901	-0.101299	0.914808
Glyma.01G131900	3.66226	6.27359	4.45633	0.119486	0.768866	0.789415	0.247515		1.01075	1.25669	0.831815	0.316073	0.611154	0.180088	0.94191
Glyma.01G132000	0.561746	0.632291	46.6294	6.8082	1.14039e-82	0.231252	0.884374		0.393032	0.712659	16.6767	5.3938	9.53786e-54	0.82119	0.419309
Glyma.01G132100	0.718647	2.44013	124.441	6.22257	1.32485e-11	1.58555	0.665454		0	0.268491	13.5549	6.30436	1.62326e-05	1.00605	0.891126
Glyma.01G132300	10.7785	10.4263	16.9069	1.31566	4.59559e-13	-0.0331952	0.968144		4.75391	5.87019	5.7069	0.816231	0.000325363	0.205611	0.766138
Glyma.01G132400	22.064	23.6341	28.6826	0.886293	1.6258e-15	0.118935	0.67727		13.4557	15.4537	13.8825	0.708296	7.67695e-08	0.105138	0.805828
Glyma.01G132500	74.0716	81.3884	111.181	1.06808	1.33142e-10	0.162992	0.707741		1371.01	1273.72	1385.95	0.978122	6.20273e-07	-0.197793	0.727044
Glyma.01G132600	90.4858	102.513	0.132561	-8.95379	1.2872e-17	0.20083	0.520218		378.134	493.496	0.220307	-10.2946	7.90056e-34	0.289884	0.0194218
Glyma.01G132700	7.40548	7.093	0.0786772	-5.84725	5.19809e-11	-0.0367463	0.98029		2.74291	3.17146	0.0906874	-4.48476	6.838e-07	0.100358	0.944613
Glyma.01G132800	10.228	12.2805	35.8055	2.15846	9.87204e-33	0.276494	0.541587		2.4003	3.0773	11.4055	2.74221	7.98191e-31	0.28658	0.717902
Glyma.01G133000	8.75401	7.39494	6.75859	0.462666	0.0138078	-0.207745	0.632915		3.82777	4.41057	2.4	-0.00605825	0.985448	0.107335	0.898314
Glyma.01G133100	0.221563	0.128731	1.72482	4.36384	3.85848e-14	-0.801564	0.601095		0.091808	0	0.0811358	2.81326	0.396159	-2.11855	0.846932
Glyma.01G133300	12.3953	11.9004	0.672647	-3.5539	1.612e-24	-0.0260981	0.981952		2.4104	2.34905	0.220444	-2.58892	7.5891e-09	-0.140961	0.887389
Glyma.01G133400	29.2051	23.489	15.4783	-0.00379135	0.989517	-0.289071	0.502243		126.723	97.8257	35.5105	-0.597575	0.000309215	-0.468502	0.032143
Glyma.01G133500	0.363625	0.670995	2.22758	2.32275	0.00227708	0.951507	0.696514		0.79724	1.37472	4.65658	2.57789	1.33909e-07	0.791113	0.595281
Glyma.01G133600	4.33369	6.03026	0.115761	-5.14451	2.757e-08	0.480811	0.582556		3.66181	5.68999	0.115897	-4.53523	6.77123e-07	0.54833	0.451546
Glyma.01G133700	6.53775	11.0997	0.368428	-4.31003	9.70451e-06	0.788078	0.445051		1.50192	2.60066	0	-5.29781	0.000153032	0.670405	0.762413
Glyma.01G133900	8.13771	11.1385	0.0670265	-6.61214	1.79459e-07	0.455907	0.631704		5.52462	8.33364	0.0668163	-6.21861	6.27259e-07	0.519628	0.444967
Glyma.01G134200	3.21297	3.35039	1.75698	-0.325846	0.574773	0.0997911	0.96362		1.33781	1.17939	0.666816	-0.00739945	0.994061	-0.273269	0.88952
Glyma.01G134400	10.5372	11.0868	14.4449	0.985708	1.85161e-11	0.101371	0.825651		14.3228	14.5197	9.49072	0.238199	0.188045	-0.0728485	0.9105
Glyma.01G134500	0	0	0	NA	NA	NA	NA		1.05229	1.13174	0.943807	0.571075	0.241602	0.0349535	0.998349
Glyma.01G134700	0.496652	0.371412	35.303	7.1872	3.22705e-11	-0.473566	0.92116		0	0.268491	10.2694	5.89078	5.57622e-05	1.00605	0.890709
Glyma.01G134800	0	1.15598	26.0659	5.18554	9.20961e-06	1.97265	0.603757		0	0	2.19483	5.27916	0.00182226	0	1
Glyma.01G135300	0	0	5.58869	6.23929	9.21957e-06	0	1		0	0	1.13214	5.52011	0.000851287	0	1
Glyma.01G135400	0.993018	1.18212	0.0534789	-3.86863	1.16404e-10	0.268448	0.766103		0.0419999	0.107537	0	-1.80778	0.53245	1.12419	0.915018
Glyma.01G135900	11.0072	12.0192	14.2882	0.871468	1.70949e-07	0.140564	0.770038		6.06868	6.50158	14.1356	1.96939	2.02958e-19	-0.00234875	1
Glyma.01G136000	16.8173	15.6319	12.333	0.268772	0.122402	-0.0827227	0.882348		28.2946	30.9147	23.8603	0.497928	0.00194702	0.0288195	0.97385
Glyma.01G136100	20.881	17.405	6.08343	-0.910916	2.37749e-09	-0.23596	0.380413		29.8926	29.9215	8.61644	-0.929293	3.49205e-11	-0.0932138	0.82682
Glyma.01G136300	37.0586	39.2551	5.07693	-2.34734	3.98101e-42	0.101883	0.79954		13.5254	12.1288	2.74834	-1.27073	6.30451e-09	-0.256256	0.559171
Glyma.01G136400	0.865354	0.841675	0.206539	-1.43862	0.540546	0.0593244	1		3.12634	3.4749	0	-5.00339	0.000294837	0.0259559	1
Glyma.01G136500	18.4034	18.0302	15.6665	0.403086	0.00616484	-0.00512019	0.998688		6.00283	7.10347	3.68732	-0.0731889	0.770582	0.148603	0.839721
Glyma.01G137000	6.14621	4.83532	0	-7.93096	1.27202e-10	-0.321911	0.625874		10.1509	11.3707	0	-7.75069	3.49093e-10	0.0627191	0.96423
Glyma.01G137200	40.2805	47.6429	0.677182	-5.50708	1.09167e-55	0.258981	0.311063		180.786	184.042	1.28422	-6.28151	3.18343e-98	-0.068668	0.828521
Glyma.01G137300	32.468	42.6659	39.0575	0.479447	1.01142e-10	0.417924	2.35395e-06		7.92797	8.59147	4.87272	0.051118	0.819583	0.0243643	0.985141
Glyma.01G137500	2.20809	2.89004	2.17811	0.220337	0.787253	0.410108	0.865869		2.19022	2.38098	0.33981	-1.9417	0.00878659	0.0427502	0.996793
Glyma.01G137600	1.10231	1.30557	0	-6.18998	3.02546e-06	0.265254	0.891772		1.65765	3.17656	0	-5.74959	1.0803e-05	0.802149	0.513366
Glyma.01G137700	0.994493	0.768956	0.0259289	-4.14204	0.00291035	-0.344558	0.882983		1.28816	1.20419	0.0360666	-4.30252	0.00118317	-0.228074	0.915189
Glyma.01G138300	29.5512	29.259	20.0661	0.05869	0.63109	0.00915829	0.991779		24.5794	25.952	16.0405	0.169277	0.257805	-0.0254208	0.973205
Glyma.01G138800	36.0623	37.9219	8.687	-1.51445	4.48757e-24	0.0943262	0.804598		33.7519	35.0981	9.14428	-1.07431	1.20539e-14	-0.0401969	0.939776
Glyma.01G139000	37.5943	33.7618	12.0811	-0.871812	2.13104e-08	-0.129371	0.729696		19.2558	20.555	7.18943	-0.644739	0.00018182	-0.00960314	1
Glyma.01G139100	7.79176	10.7435	3.23384	-1.12236	0.000177091	0.476746	0.365991		3.40817	3.92168	1.51351	-0.478167	0.254776	0.110705	0.94686
Glyma.01G139500	24.7635	29.7774	4.90645	-1.98248	2.16879e-19	0.282245	0.473634		10.2903	12.0975	2.16283	-1.62211	7.13351e-15	0.128374	0.812616
Glyma.01G139600	37.9758	36.1619	8.79677	-1.42607	3.91622e-36	-0.0508847	0.884911		34.1387	34.2345	10.2742	-0.876454	6.0719e-08	-0.0907208	0.869098
Glyma.01G139700	23.5399	22.7744	6.96064	-1.09799	3.70391e-18	-0.0291418	0.947706		4.0672	3.2551	0.978585	-0.875977	0.00022657	-0.412479	0.226986
Glyma.01G139900	8.21346	11.7764	28.9132	1.92424	5.55301e-16	0.533607	0.275006		1.28756	1.68282	5.62346	2.55543	3.55612e-09	0.356253	0.840298
Glyma.01G140000	39.9659	45.7794	85.3946	1.51136	1.12713e-38	0.223285	0.332752		13.8285	18.2564	24.7041	1.30596	6.16466e-11	0.309455	0.523147
Glyma.01G140100	0.130663	0.307193	0	-1.84872	0.591689	0.994951	0.929634		3.54848	2.41735	0.0695595	-4.37037	0.00098178	-0.632205	0.641882
Glyma.01G140200	14.3786	16.4793	7.28992	-0.571397	0.00131599	0.215854	0.578162		15.8517	15.8792	3.96302	-1.11808	2.02252e-06	-0.0955131	0.901539
Glyma.01G140600	36.1722	38.5584	50.1562	0.98388	9.61231e-27	0.115819	0.581404		9.43487	9.95787	5.94409	0.115745	0.460514	-0.0190582	0.984234
Glyma.01G141900	1.35218	1.68816	4.89669	2.13275	1.65488e-21	0.348532	0.531069		0.113716	0.175066	2.39524	4.67192	4.63266e-07	0.485251	0.925216
Glyma.01G142300	28.8933	30.3147	23.438	0.240211	0.0232917	0.0887572	0.748188		8.0233	9.43585	4.90259	-0.0819954	0.644575	0.138069	0.760295
Glyma.01G142400	3.06613	0.0988486	3.94064	5.6353	1.80214e-05	-4.64521	0.00886297		9.28536	2.39717	47.0502	5.14189	3.88242e-26	-2.02699	0.0020435
Glyma.01G142700	30.9948	26.409	17.0625	-0.018334	0.870794	-0.209226	0.20734		9.54033	11.3011	6.29921	0.0185368	0.90779	0.142442	0.691885
Glyma.01G142800	5.49522	4.73452	3.76665	0.273835	0.344082	-0.181042	0.82418		5.27513	5.76294	1.95178	-0.665908	0.0721734	0.03964	0.985141
Glyma.01G142900	1.96036	2.07824	1.38225	0.00218586	0.998087	0.126577	0.931321		3.91328	3.85066	2.34448	0.15115	0.740375	-0.152704	0.919119
Glyma.01G143000	3888.65	4628.01	1183.36	-1.34099	9.39304e-05	0.271671	0.770498		14.0081	23.5756	18.1448	0.491884	0.475492	0.660953	0.718507
Glyma.01G143100	44.417	44.7961	5.44139	-2.4332	2.66983e-89	0.0318938	0.928879		64.3296	71.6642	2.92501	-3.71642	1.41489e-81	0.059711	0.902599
Glyma.01G143400	0	0	1.05526	4.75307	0.00731223	0	1		0	0	0.380074	3.13365	0.445263	0	1
Glyma.01G143700	33.5886	38.4359	19.6134	-0.363421	0.000910941	0.213812	0.248002		7.89678	9.28362	4.38693	-0.21623	0.187415	0.145047	0.728251
Glyma.01G143800	0.82174	1.28157	0.0430427	-4.25748	0.000384718	0.657878	0.66149		0.642136	1.90683	0.0551492	-4.17637	0.00254128	1.46828	0.299408
Glyma.01G144200	27.3657	24.5429	10.8843	-0.572694	2.43835e-06	-0.133043	0.629439		8.57724	8.63558	2.87891	-0.730377	1.09297e-06	-0.0822579	0.865296
Glyma.01G144500	28.6099	29.0406	2.41284	-2.98095	1.56885e-154	0.0466088	0.869544		12.1133	13.91	0.934328	-3.02132	7.43369e-37	0.105386	0.82539
Glyma.01G144700	4.12379	3.89337	0.133646	-4.20891	0.000562568	-0.0814457	0.981111		3.26407	5.16137	0.260061	-3.33959	7.09285e-06	0.555488	0.514199
Glyma.01G144800	8.39627	11.4629	9.93746	0.413567	0.00537384	0.465312	0.03206		21.3182	21.1106	8.54047	-0.446872	0.0275833	-0.101839	0.876589
Glyma.01G144900	20.5422	28.7935	0.689231	-4.76973	6.43144e-46	0.506951	0.0219194		14.2807	18.4325	0.252006	-5.33611	1.92921e-25	0.274397	0.442999
Glyma.01G145000	15.2657	14.4829	7.13868	-0.415203	0.0240617	-0.0528054	0.930963		71.6399	64.8524	16.3403	-1.12027	5.39386e-08	-0.240053	0.606317
Glyma.01G145200	0.525141	0.663961	4.69936	3.42725	8.82274e-10	0.352013	0.880077		0.763845	0.534981	4.53643	3.92628	4.45441e-22	-0.605776	0.610282
Glyma.01G145300	12.111	9.3002	6.89464	0.185589	0.399198	-0.369861	0.319773		21.3231	21.1052	9.87291	-0.224574	0.354766	-0.112871	0.891126
Glyma.01G145400	43.3284	32.7966	138.761	2.68836	3.77064e-191	-0.377393	0.00313922		22.9981	19.1535	53.8675	2.35262	1.44726e-54	-0.358141	0.1958
Glyma.01G145500	1.66437	1.72894	0.550156	-1.04158	0.633432	0.0980587	0.995318		0	0	0	NA	NA	NA	NA
Glyma.01G145700	0.851356	0.859711	1.17245	1.06017	0.285794	-0.0321531	0.999669		0.124675	1.32711	0.341375	-1.05463	0.549248	2.87323	0.43616
Glyma.01G146100	26.2619	24.3306	50.0973	1.64872	1.16771e-47	-0.0831513	0.814095		10.2992	11.2909	15.9303	1.3569	1.50639e-29	0.0397651	0.945519
Glyma.01G146300	5.45938	5.69556	0.22059	-4.05643	1.0465e-10	0.0855836	0.942487		5.48369	7.29768	0.175625	-4.54253	8.01092e-09	0.310798	0.702767
Glyma.01G146400	70.9338	59.8577	32.2976	-0.282814	0.0104454	-0.223451	0.201495		32.9149	37.106	19.1952	-0.0882883	0.519132	0.0807998	0.85235
Glyma.01G146600	41.1829	33.662	30.8215	0.476317	3.36657e-06	-0.262648	0.0954846		8.35044	9.2962	8.49012	0.723951	6.53064e-07	0.0681147	0.904418
Glyma.01G146900	7.08307	6.07754	6.60541	0.722132	0.00444821	-0.20932	0.761954		1.19937	1.19784	1.29239	0.993953	0.0759687	-0.108965	0.970428
Glyma.01G147000	18.6816	18.8178	7.7304	-0.683603	0.00045746	0.0355127	0.962586		3.32628	3.53271	1.18522	-0.712118	0.0215546	-0.010029	1
Glyma.01G147400	8.18413	6.52984	0.543799	-2.97974	2.13337e-11	-0.311188	0.649025		5.42118	4.6438	0.241081	-3.31711	3.55185e-10	-0.31615	0.645149
Glyma.01G147500	13.7028	15.1785	0.363003	-4.77122	4.37966e-23	0.165335	0.781055		5.70575	6.09777	0.417103	-2.98986	6.97277e-12	0.0127628	1
Glyma.01G147600	2.88584	2.3223	0.378848	-2.02546	0.0616975	-0.321289	0.905713		5.90268	5.84036	1.15568	-1.47658	0.000298357	-0.121258	0.917039
Glyma.01G147700	18.173	15.7443	5.52046	-0.907816	4.20058e-06	-0.183642	0.672223		13.4399	18.3567	34.0313	1.74985	2.66636e-30	0.343108	0.268162
Glyma.01G147800	26.872	26.798	27.2484	0.633676	3.10478e-15	0.017941	0.955833		10.5324	12.4066	9.68441	0.506783	0.0011682	0.132604	0.780044
Glyma.01G147900	47.5623	44.4333	6.25851	-2.22943	1.69677e-33	-0.074231	0.880359		3.85509	3.95632	0.847755	-1.38196	0.000732611	-0.0525135	0.977251
Glyma.01G148000	17.8703	21.0498	3.50169	-1.99013	1.70055e-11	0.261899	0.652707		9.07714	10.7993	1.94345	-1.57495	0.000239235	0.160102	0.896417
Glyma.01G148100	91.6631	101.45	28.6369	-1.22987	2.18102e-18	0.167586	0.599085		8.86132	10.3558	1.98147	-1.50791	5.17884e-13	0.127152	0.854623
Glyma.01G148300	8.90355	10.4276	14.8256	1.12749	1.89983e-10	0.241958	0.570941		5.19478	5.79804	5.37789	0.752288	0.00126342	0.0446642	0.971659
Glyma.01G148500	22.4895	27.8839	22.2176	0.286618	0.00829752	0.32995	0.0342331		54.3455	58.6681	34.3057	0.0929148	0.510185	0.0098481	0.997933
Glyma.01G148600	35.5248	34.1552	20.6472	-0.11633	0.445842	-0.0356734	0.946062		36.5728	31.2489	4.0212	-2.09641	4.72626e-25	-0.32685	0.259444
Glyma.01G148700	24.0111	24.0202	0.884015	-4.16177	2.7791e-20	0.0133217	0.995305		38.8622	44.5727	1.11936	-4.46451	1.59457e-59	0.10184	0.772835
Glyma.01G148800	18.5326	20.6627	58.3016	2.09247	1.82163e-22	0.184608	0.786793		23.1035	30.2327	36.9819	1.15868	4.6267e-14	0.291295	0.369492
Glyma.01G148900	7.5702	7.39354	0.448818	-3.43598	2.88409e-24	-0.0220776	0.987269		5.93981	7.15737	0.376575	-3.45746	2.94351e-14	0.171525	0.819264
Glyma.01G149000	58.3921	49.4721	229.763	2.82968	2.57126e-120	-0.209973	0.393246		59.5657	62.5686	79.5835	1.20473	2.63295e-12	-0.0222887	0.986108
Glyma.01G149100	79.0987	72.6417	462.606	3.28061	3.49059e-78	-0.082958	0.898941		31.1871	33.4392	61.064	1.71516	3.37896e-14	0.00225621	1
Glyma.01G149300	40.7408	36.8963	64.5817	1.41947	3.98659e-44	-0.118649	0.642326		14.4503	13.7658	24.3777	1.68801	3.24735e-28	-0.169624	0.700888
Glyma.01G149400	6.4799	7.48717	14.089	1.5273	1.08199e-13	0.229265	0.677313		6.82893	9.2238	13.2431	1.37534	1.90983e-12	0.321155	0.494014
Glyma.01G149700	35.1549	35.825	19.5639	-0.270991	0.0322335	0.0532082	0.894889		78.6142	66.456	32.0921	-0.190947	0.133303	-0.337868	0.047097
Glyma.01G149800	17.707	16.8929	2.64268	-2.07104	1.56636e-24	-0.0358019	0.958948		3.48944	3.63394	0.814311	-1.28432	2.55889e-05	-0.0467873	0.971207
Glyma.01G149900	24.2295	29.584	17.4723	-0.152936	0.434987	0.316515	0.36369		19.7393	24.1977	9.16791	-0.540563	0.000689932	0.199892	0.542757
Glyma.01G150000	0.292899	1.38435	0.0960615	-3.08392	0.0930899	2.2845	0.517568		0.700604	1.21466	0.180577	-1.74297	0.10827	0.694144	0.786277
Glyma.01G150100	1.47735	2.05481	0.261395	-2.44891	0.0284988	0.537283	0.843494		0.977687	0.851724	0.0540692	-2.77068	0.058714	-0.298416	0.931442
Glyma.01G150200	24.9224	18.4684	15.3918	0.342709	0.052914	-0.41388	0.121788		19.8329	18.2049	11.9947	0.265174	0.147588	-0.228677	0.578562
Glyma.01G150300	15.981	14.99	21.4753	1.12578	3.89964e-09	-0.0732576	0.916911		8.66756	10.6696	7.05244	0.264191	0.206935	0.21182	0.690584
Glyma.01G150400	32.0074	27.7238	16.0012	-0.187349	0.236185	-0.181537	0.57529		61.5618	60.1036	40.1515	0.282319	0.01319	-0.128093	0.648794
Glyma.01G150500	15.4605	14.4071	11.1878	0.251225	0.285916	-0.0892166	0.905623		6.35113	6.05212	5.50736	0.722588	0.00318689	-0.161157	0.846547
Glyma.01G150600	16.2602	14.8601	15.2638	0.658464	0.000773622	-0.1111	0.859571		65.6203	69.0252	36.4648	-0.0516202	0.820422	-0.0306734	0.979324
Glyma.01G150700	20.7033	17.5546	19.8171	0.779336	6.83346e-13	-0.213916	0.277656		20.5196	22.658	19.956	0.676515	5.33106e-06	0.0427445	0.952211
Glyma.01G150800	15.5476	13.3213	4.06346	-1.10028	2.72298e-08	-0.208196	0.602174		6.56901	7.30215	2.12916	-0.914284	0.00159394	0.0593558	0.960565
Glyma.01G150900	3.05176	4.66516	0	-6.06513	5.43139e-06	0.623284	0.683142		4.65386	6.3919	0.121238	-4.72538	1.50149e-07	0.352341	0.652111
Glyma.01G151000	1.01627	0.533475	0.358626	-0.00316582	1	-0.806743	0.940897		0.251618	0	0	0	1	-1.56352	0.929398
Glyma.01G151100	1.0276	1.24406	0.0445705	-4.16486	0.000407912	0.314181	0.863551		0.584752	1.30472	0	-5.13981	0.000203579	1.12467	0.495286
Glyma.01G151300	0.0327446	0.143566	19.3697	7.78853	1.20736e-22	2.00985	0.512655		0.0674436	0.0526655	7.48551	7.93128	2.16719e-13	0.0432513	1
Glyma.01G151400	1.8078	1.44016	5.7159	2.53333	0.0022148	-0.263063	0.937619		1.18686	0.600224	8.28269	4.6882	3.60965e-13	-1.04834	0.542349
Glyma.01G151500	11.7356	11.7802	7.11321	-0.123793	0.631415	0.0259289	0.985233		6.87014	8.11126	5.14857	0.180946	0.587019	0.160173	0.88542
Glyma.01G151600	2.44833	1.38286	9.13134	3.3379	9.39163e-32	-0.789352	0.104084		1.63986	1.58351	5.23289	2.57511	4.56163e-15	-0.154061	0.915133
Glyma.01G151700	48.99	44.9619	11.9828	-1.30734	4.73005e-17	-0.100784	0.819147		13.1674	13.4828	4.59331	-0.688216	6.51821e-05	-0.0665774	0.911208
Glyma.01G151800	13.3005	12.2659	7.45446	-0.114776	0.481791	-0.0885085	0.848163		2.3266	2.89885	1.51715	-0.0723837	0.8234	0.203063	0.816576
Glyma.01G151900	0	0	0	NA	NA	NA	NA		0.616504	1.1746	0.939208	0.546207	0.774505	0.954754	0.891114
Glyma.01G152100	39.4625	42.7814	11.3454	-1.30878	1.13676e-20	0.140307	0.671443		16.6743	21.5791	8.22557	-0.535633	0.000869869	0.28301	0.319969
Glyma.01G152200	1.1136	0.639989	7.35594	4.1934	2.05316e-05	-0.871284	0.773425		0.172087	0.394517	1.1438	2.3177	0.00911151	1.0419	0.752409
Glyma.01G152300	1.73253	3.84515	11.9392	2.22027	5.25923e-10	1.1662	0.096008		0.0849682	0.122351	0.555295	3.04497	0.00251497	0.381117	0.945519
Glyma.01G152400	167.491	209.206	321.928	1.23663	1.50705e-18	0.338882	0.184372		13.602	12.7501	20.454	1.55685	7.53885e-06	-0.16636	0.906257
Glyma.01G152500	6.54586	5.25418	3.24499	-0.104739	0.742332	-0.285348	0.678546		4.14264	5.32369	2.96752	0.0259857	0.932089	0.285043	0.651993
Glyma.01G152600	0.243022	0.777136	0.318813	-0.558773	0.828002	1.60619	0.82054		1.26425	1.18007	0.239664	-1.32753	0.262957	-0.203815	0.959797
Glyma.01G152700	0.594161	0.385336	8.67316	5.05454	1.17951e-18	-0.622525	0.72771		0.55105	1.0228	9.25248	4.02858	1.01231e-18	0.815335	0.590147
Glyma.01G152900	2.26574	1.26892	21.54	4.72552	1.168e-56	-0.812964	0.120003		2.27572	1.11886	9.57349	3.9909	2.49098e-40	-1.13246	0.0147842
Glyma.01G153000	4.2769	3.92959	20.9295	3.05114	1.37568e-22	-0.123892	0.923268		3.80609	4.30749	5.19618	1.12975	0.0011303	0.0959166	0.955665
Glyma.01G153100	8.85533	7.93747	3.49503	-0.56883	0.00415315	-0.137664	0.791086		5.09917	4.3259	1.6152	-0.599233	0.0479695	-0.321756	0.611551
Glyma.01G153200	51.7496	42.4066	19.7725	-0.486355	3.63173e-05	-0.261239	0.158356		34.7895	32.2517	16.8308	-0.079204	0.700919	-0.203893	0.682458
Glyma.01G153300	3.31775	3.46541	33.1143	3.89422	2.59409e-12	0.0979317	0.969882		1.96054	2.77822	18.5282	3.59505	9.60467e-11	0.404192	0.845653
Glyma.01G153400	2.07823	1.63306	2.01918	0.98199	0.449368	-0.3557	0.937663		0.874616	0.220476	0.736679	2.671	0.0902303	-2.18789	0.528365
Glyma.01G153600	14.2161	12.4184	4.73956	-0.768703	5.29452e-06	-0.183106	0.612143		7.47441	6.30558	2.12363	-0.721074	0.0127517	-0.336731	0.573978
Glyma.01G153700	1.01936	1.56787	0.20945	-2.27119	0.0126636	0.60176	0.761898		0.219963	0.21506	0.0710709	-0.677703	0.572806	-0.0877335	0.993836
Glyma.01G154000	0.539786	1.08331	0.480938	-0.559434	0.581637	1.01521	0.665431		2.45519	3.24469	0.96577	-0.879995	0.0992948	0.301054	0.841796
Glyma.01G154100	19.3931	16.9963	20.7529	0.898475	2.2405e-08	-0.169022	0.678836		16.6868	19.135	16.02	0.603989	0.00250587	0.104424	0.890666
Glyma.01G154200	32.779	28.7507	4.27847	-2.14676	4.14573e-17	-0.160071	0.775213		84.0505	75.5948	10.384	-1.98002	4.35978e-26	-0.248551	0.433985
Glyma.01G154300	35.6468	34.8619	29.2656	0.35852	0.00332791	-0.00826054	0.994453		15.976	19.8739	26.8081	1.2906	3.9117e-20	0.215812	0.524828
Glyma.01G154400	22.9487	21.2151	1.09654	-3.66263	4.98962e-29	-0.0914557	0.89834		10.6158	12.708	0.549014	-3.60672	5.15687e-23	0.16043	0.820196
Glyma.01G154500	57.0212	54.9436	42.5012	0.229011	0.0473142	-0.0262499	0.950788		8.61177	9.54774	6.84708	0.378145	0.242407	0.0458993	0.980754
Glyma.01G154600	76.6839	86.0013	77.2023	0.448848	1.22854e-05	0.186859	0.328472		35.3631	49.2275	31.3954	0.219665	0.223252	0.38221	0.193297
Glyma.01G154700	22.3287	22.2841	20.7113	0.502039	0.00149713	0.0193112	0.981984		9.02433	9.3545	6.03804	0.220989	0.238977	-0.0528267	0.946591
Glyma.01G154900	19.8666	12.6591	206.574	4.65154	6.73216e-114	-0.634171	0.0522754		41.4353	29.0583	238.527	3.89531	3.11016e-133	-0.606744	0.00794784
Glyma.01G155000	6.36293	5.13271	0.863492	-1.96047	0.00151316	-0.304724	0.837187		2.43171	2.53258	0.407452	-1.71694	0.00351818	-0.0555771	0.985141
Glyma.01G155100	0.337825	0.519159	1.05817	1.65773	0.116341	0.683826	0.85639		0	0.427907	0.13461	-0.443158	0.910414	2.3685	0.840796
Glyma.01G155200	10.968	8.33399	4.9616	-0.134202	0.585512	-0.369875	0.375139		10.3191	10.2173	3.1897	-0.808281	0.00130144	-0.11283	0.896294
Glyma.01G155300	49.9347	40.2284	11.7304	-1.17422	5.34381e-31	-0.286903	0.0354416		16.9079	16.6168	4.34173	-1.06533	3.27485e-14	-0.119848	0.735701
Glyma.01G155600	3.03417	4.34593	2.45539	-0.206205	0.537842	0.520918	0.391979		1.49192	1.47389	1.14244	0.4626	0.257789	-0.0807943	0.96637
Glyma.01G155800	16.6607	15.7759	9.52661	-0.113068	0.685707	-0.0607662	0.948314		8.33079	9.32487	11.2938	1.12349	9.83572e-07	0.0906274	0.925265
Glyma.01G155900	2.10259	1.66006	12.5954	3.51208	1.36474e-36	-0.288648	0.740936		0.513413	0.8403	3.20335	2.81014	1.61938e-14	0.563273	0.617125
Glyma.01G156000	19.4032	21.0363	14.1496	0.0396616	0.779776	0.136794	0.657417		8.33362	11.0837	6.34002	0.0474023	0.869633	0.314904	0.60409
Glyma.01G156200	24.9298	28.3046	6.55679	-1.50023	3.14195e-22	0.20418	0.482462		12.023	19.0128	3.23525	-1.70757	1.33745e-19	0.572255	0.00477851
Glyma.01G156400	23.357	20.1441	8.38925	-0.661776	5.7844e-07	-0.189323	0.447117		21.3572	22.2508	5.68902	-1.08916	1.12474e-09	-0.0361857	0.964976
Glyma.01G156600	18.824	19.9903	16.6948	0.34406	0.0289847	0.119165	0.786435		40.6849	32.742	14.3393	-0.336608	0.0292455	-0.408965	0.0466433
Glyma.01G156700	9.32693	13.3467	1.11488	-2.97375	4.93066e-27	0.540987	0.0689935		15.204	20.1592	4.53403	-1.27885	5.05492e-13	0.314364	0.245586
Glyma.01G156800	23.2313	26.8262	1.24235	-3.82163	2.08634e-174	0.226243	0.135855		6.24848	8.37278	0.340955	-3.70819	8.66021e-22	0.318251	0.434533
Glyma.01G157000	26.839	29.6059	28.9364	0.579072	3.57777e-05	0.157817	0.643701		19.4002	25.8583	35.2346	1.31116	2.52435e-23	0.32286	0.171401
Glyma.01G157100	9.02903	8.80159	5.24041	-0.132278	0.587763	-0.0230685	0.986703		3.46271	3.28151	0.682251	-1.40215	0.00246507	-0.18734	0.881331
Glyma.01G157300	14.3095	15.0596	5.84244	-0.750365	0.000866165	0.0966346	0.891772		6.39522	6.94862	3.97448	0.0452713	0.858267	0.0208689	0.993368
Glyma.01G157400	16.0285	14.1803	59.5814	2.67708	4.37892e-41	-0.152482	0.823119		12.7238	12.1803	48.7567	2.87023	4.06276e-63	-0.152804	0.800442
Glyma.01G157500	6.85094	5.56615	6.83554	0.914972	1.10892e-05	-0.288535	0.52674		3.3098	3.33206	4.28914	1.23013	4.35319e-06	-0.0730579	0.957033
Glyma.01G157600	10.4813	12.1482	4.09186	-0.963724	6.97936e-10	0.232107	0.425516		17.1094	13.4176	4.58919	-0.682903	0.0307986	-0.438508	0.450198
Glyma.01G157800	35.9101	34.1318	71.1865	1.67262	1.81076e-78	-0.0554416	0.852501		5.79737	6.32615	9.94817	1.51018	1.43115e-22	0.0184824	0.990066
Glyma.01G157900	27.407	27.7411	229.952	3.65921	1.55853e-152	0.0518009	0.920567		8.92988	10.3471	39.722	2.79808	1.65028e-109	0.112033	0.804457
Glyma.01G158000	0.253615	0.377187	1.39442	2.4851	0.00202535	0.593405	0.849088		0.568426	0.463557	0.645932	1.28447	0.0868626	-0.310179	0.915256
Glyma.01G158100	6.00174	4.44876	6.98111	1.22855	0.000291609	-0.388983	0.638022		1.78026	1.41176	1.19103	0.591965	0.262066	-0.397322	0.795857
Glyma.01G158200	23.4486	25.5868	14.1138	-0.2482	0.146633	0.151402	0.713905		12.2433	12.5602	4.3898	-0.657475	0.00189442	-0.0528096	0.952378
Glyma.01G158300	14.9115	15.368	29.1196	1.53713	8.49716e-19	0.0577436	0.932945		8.3096	9.33013	16.2046	1.65693	1.14635e-24	0.0586973	0.938472
Glyma.01G158400	23.4459	20.8262	25.0952	0.877776	3.08443e-20	-0.148657	0.456189		6.51815	8.23022	5.85325	0.36512	0.0181916	0.243404	0.443093
Glyma.01G158500	56.4668	58.7993	38.8075	0.0124023	0.927833	0.0782472	0.827735		28.6495	33.1123	13.6097	-0.417404	0.00358767	0.116827	0.762199
Glyma.01G158600	8.09303	12.329	3.53303	-1.18601	1.63942e-09	0.632529	0.0126225		1.6034	1.92724	0.568271	-0.882104	0.028256	0.187641	0.885258
Glyma.01G158800	4.52161	5.33591	1.6938	-1.046	0.00485934	0.257411	0.781482		7.97541	9.81005	3.28896	-0.703557	0.0202537	0.213205	0.799911
Glyma.01G159000	13.6948	11.5166	20.7143	1.45913	8.13788e-27	-0.231585	0.423563		11.4646	10.7795	12.6526	1.08149	2.06245e-11	-0.179702	0.688542
Glyma.01G159100	11.5167	7.97626	0.642207	-3.05826	7.97163e-09	-0.47859	0.528865		2.07727	1.92224	0.084315	-3.73921	5.20127e-05	-0.210101	0.879596
Glyma.01G159200	7.70402	8.2958	0.60421	-3.18536	1.65895e-19	0.139101	0.858892		6.61452	7.23933	0.574359	-2.81379	1.34441e-10	0.0465821	0.974986
Glyma.01G159400	7.52346	5.35505	2.48752	-0.497612	0.0191	-0.460155	0.138043		10.3322	10.9683	2.80681	-1.11897	6.61781e-07	-0.00823916	1
Glyma.01G159500	44.4882	42.9866	28.5276	0.0198855	0.867312	-0.0270867	0.945186		42.5416	39.4567	21.9287	0.00714945	0.967121	-0.205982	0.477545
Glyma.01G159600	8.38255	7.45523	0.769157	-2.67276	1.52685e-23	-0.142423	0.79434		6.09224	6.01611	0.499055	-2.69892	1.79306e-15	-0.118825	0.871281
Glyma.01G159700	77.8004	60.6673	0.504991	-6.33851	1.8215e-57	-0.32898	0.113916		51.3504	58.8226	0.799698	-5.3293	2.51896e-68	0.102385	0.771629
Glyma.01G159800	36.6465	28.4621	3.50103	-2.42655	3.79596e-22	-0.333529	0.327999		57.5821	54.3913	5.51836	-2.43236	8.54787e-43	-0.174777	0.655075
Glyma.01G159900	33.6669	28.6194	33.6484	0.836477	2.7196e-19	-0.2084	0.190069		17.6321	21.5442	16.1131	0.43957	0.000929536	0.192982	0.516684
Glyma.01G160100	0.19458	0.364887	8.41447	5.18718	3.60608e-12	0.851803	0.790293		1.24298	0.715869	18.767	5.54013	1.2504e-36	-0.840502	0.472025
Glyma.01G160300	44.17	30.2112	0.173232	-6.83919	2.61196e-47	-0.522195	0.000178752		37.1135	33.34	0.531562	-5.10388	1.05387e-67	-0.248248	0.196072
Glyma.01G160600	7.45216	13.5593	0	-6.64041	2.7346e-07	0.88913	0.365609		5.83257	8.68854	0	-6.63667	1.218e-07	0.481653	0.582611
Glyma.01G161200	16.844	11.8193	29.4322	1.92154	1.33362e-16	-0.477323	0.273991		23.2126	20.147	21.344	0.949876	0.00157896	-0.298881	0.725027
Glyma.01G161300	73.5462	67.1617	141.473	1.66231	1.17894e-12	-0.0850412	0.924242		22.1556	26.1028	33.2171	1.23349	6.07288e-06	0.133411	0.903872
Glyma.01G161400	21.9916	24.0467	43.1746	1.45546	8.0161e-22	0.156972	0.709902		9.16659	11.4756	11.7992	0.890179	2.86337e-05	0.247485	0.668014
Glyma.01G161500	19.8886	5.43856	599.116	7.39111	2.3744e-73	-1.82251	0.000601113		29.2968	16.6182	1019.38	6.78729	2.03023e-204	-0.89797	0.00511807
Glyma.01G161600	34.8751	20.9778	53.6395	1.96573	2.88907e-57	-0.704177	2.40572e-06		23.8825	23.9428	27.6059	1.06061	9.60716e-13	-0.0919468	0.869875
Glyma.01G161700	17.1496	13.8305	11.7592	0.377568	0.0522015	-0.292493	0.435125		14.3428	15.1663	8.60024	0.0340364	0.86686	-0.00897243	1
Glyma.01G161800	44.0896	37.6921	19.3521	-0.348584	0.00752969	-0.207206	0.380875		8.05679	10.4341	3.53913	-0.683002	0.000926946	0.283941	0.477545
Glyma.01G161900	22.9759	18.8007	15.0159	0.284152	0.104367	-0.271183	0.406478		19.3471	18.8837	23.3814	1.16904	1.73511e-17	-0.136967	0.739035
Glyma.01G162000	43.3746	42.6156	35.467	0.3423	0.00502052	-0.0013708	1		38.4065	42.1307	29.5434	0.342823	0.00924545	0.0382197	0.947774
Glyma.01G162100	37.9254	35.105	10.8782	-1.0805	1.52896e-14	-0.0859764	0.835526		17.8168	19.0689	8.40259	-0.315035	0.0370752	0.00143662	1
Glyma.01G162200	72.1324	64.9125	55.1743	0.369413	3.11323e-05	-0.125104	0.498274		14.9859	17.2876	11.2573	0.236973	0.113711	0.11242	0.809929
Glyma.01G162300	1.86081	2.32716	1.74391	0.216244	0.775689	0.353845	0.880569		2.23307	4.26358	1.29172	-0.874166	0.0321147	0.850127	0.147874
Glyma.01G162500	0.11301	0	1.17295	5.84501	0.000164178	-1.75803	0.704639		0.781346	0.427345	2.52547	3.47314	2.51082e-05	-0.969502	0.691594
Glyma.01G162700	23.3708	19.0463	14.9742	0.266001	0.102136	-0.273506	0.348337		30.1549	27.5028	14.5351	-0.0655072	0.700096	-0.227709	0.460912
Glyma.01G162800	37.1748	27.5323	54.3589	1.58527	1.15867e-40	-0.406669	0.0165507		32.6314	25.3797	22.4372	0.681115	4.41344e-09	-0.459313	0.00205542
Glyma.01G162900	10.9495	8.03192	3.87052	-0.433366	0.166266	-0.424135	0.451598		14.7562	16.0806	5.48327	-0.683614	0.00157907	0.0412002	0.965647
Glyma.01G163000	7.5742	6.44772	18.0479	2.10527	6.61305e-19	-0.219871	0.744872		3.68328	5.45368	8.11829	1.44006	6.9635e-16	0.471882	0.155882
Glyma.01G163100	2.20989	1.70119	1.36803	0.252575	0.792634	-0.339812	0.906343		7.18514	3.54345	3.10676	0.669288	0.0305197	-1.11548	0.00184854
Glyma.01G163200	12.1531	12.7675	14.6986	0.81628	9.4346e-05	0.0899079	0.902031		6.78954	8.7193	8.49317	0.822459	0.00248019	0.294492	0.69645
Glyma.01G163300	31.8523	39.3664	24.8846	-0.0591747	0.650685	0.331238	0.0659971		22.171	24.9134	10.9837	-0.324446	0.013045	0.0737459	0.867201
Glyma.01G163500	3.05016	10.4384	0	-7.47875	3.47816e-09	1.81829	0.00265588		13.8138	36.4696	0	-8.33951	1.00304e-11	1.31119	6.22996e-06
Glyma.01G163700	4.81377	6.70035	2.85831	-0.590478	0.158349	0.489852	0.578337		6.3221	6.14954	2.45497	-0.44731	0.137535	-0.149538	0.87236
Glyma.01G163800	10.829	10.5983	1.2683	-2.45241	2.01019e-10	-0.0171421	0.994631		10.0782	7.24014	1.07948	-1.88425	4.40614e-11	-0.571359	0.0461799
Glyma.01G163900	61.4262	59.1147	70.1008	0.865179	1.65938e-09	-0.0346289	0.950109		203.759	201.591	106.017	-0.0660678	0.614927	-0.110688	0.750431
Glyma.01G164000	28.7268	28.0591	60.9998	1.72968	9.62328e-47	-0.00962287	0.992755		18.2176	22.2681	29.4151	1.26404	1.55939e-21	0.191991	0.558745
Glyma.01G164100	38.0779	34.2245	32.8057	0.545325	8.89717e-10	-0.129248	0.491219		26.8109	27.7368	15.2247	-0.00635199	0.969469	-0.0499744	0.920522
Glyma.01G164200	42.5629	35.6513	6.27987	-1.90137	7.68766e-26	-0.228763	0.431451		96.956	100.83	23.3729	-1.24366	4.52762e-29	-0.0383901	0.923578
Glyma.01G164300	37.6345	29.877	12.1187	-0.693119	1.16269e-06	-0.309516	0.14006		61.1967	66.6316	39.9297	0.119685	0.308481	0.0309126	0.952378
Glyma.01G164400	7.26283	6.73674	1.85363	-1.25978	0.000987979	-0.0893109	0.942514		3.01431	2.74482	0.346213	-2.20764	0.00253755	-0.242334	0.885258
Glyma.01G164500	13.8404	14.4678	0	-9.36749	1.21985e-14	0.0893411	0.889605		5.47065	6.24251	0	-8.02252	7.48946e-11	0.101212	0.923842
Glyma.01G164700	0.387084	0.341489	0	-3.85882	0.02101	-0.191525	0.97156		1.45538	0.983888	0.424538	-0.393153	0.666928	-0.653653	0.750298
Glyma.01G164900	9.11671	7.24848	5.6104	0.252534	0.244186	-0.311873	0.446429		8.75365	7.90997	5.16237	0.23027	0.328916	-0.239172	0.665125
Glyma.01G165100	24.6065	22.0463	16.8973	0.21986	0.0976198	-0.132985	0.667158		39.7194	40.2264	13.4813	-0.712841	1.14398e-05	-0.0786215	0.89412
Glyma.01G165200	18.7106	15.5486	0.289853	-5.17409	1.77071e-33	-0.235556	0.576706		16.1697	18.7095	0.0577896	-7.61442	4.90834e-13	0.119333	0.814414
Glyma.01G165300	3.63313	2.58369	5.05747	1.58546	0.000410195	-0.473271	0.684328		6.26411	5.26498	7.51866	1.36929	2.15641e-07	-0.33733	0.617837
Glyma.01G165400	11.7524	6.93507	29.7383	2.71084	7.63774e-33	-0.735038	0.042949		9.69183	5.71391	19.1639	2.6086	4.44452e-43	-0.836283	0.00140142
Glyma.01G165900	2.89682	4.55142	11.1066	1.91314	6.1463e-11	0.666209	0.292034		0.984361	0.697293	3.35366	3.11192	1.01545e-11	-0.638606	0.603577
Glyma.01G166000	7.73733	3.75848	344.218	7.09793	2.51986e-41	-0.961406	0.372474		13.722	4.29705	301.9	7.00179	4.6099e-70	-1.77281	0.000837125
Glyma.01G166100	10.1634	10.5231	17.6953	1.36818	1.52117e-18	0.0640769	0.911635		5.023	4.77215	8.10126	1.61995	3.18444e-17	-0.172656	0.786614
Glyma.01G166300	25.247	24.1756	0.11119	-7.12328	1.98574e-11	-0.0478102	0.954625		24.4535	29.68	0.159837	-6.52145	3.75304e-18	0.189625	0.650157
Glyma.01G166400	54.0243	47.7049	44.2423	0.498001	3.63001e-11	-0.155894	0.227306		7.02166	7.07132	5.30477	0.441155	0.000192353	-0.0799193	0.844079
Glyma.01G166600	9.14007	9.3549	6.40638	0.0575378	0.843696	0.0557388	0.9577		5.39308	6.5484	2.25404	-0.654134	0.00956131	0.187146	0.77839
Glyma.01G166700	20.9349	19.3483	23.9759	0.915269	8.28529e-10	-0.0899459	0.852288		17.1579	19.1929	16.7549	0.665478	1.87125e-05	0.0742233	0.90167
Glyma.01G166800	0.462301	1.02225	0	-4.23263	0.0197643	1.14974	0.775139		0.21573	0.514984	0	-3.19797	0.0780157	1.0749	0.825849
Glyma.01G167100	0	0	2.54618	5.65256	0.00021336	0	1		0.0878619	0	0	0	1	-0.917526	0.96637
Glyma.01G167200	5.24868	5.23173	1.28588	-1.43521	2.5072e-05	0.0316268	0.986198		1.63658	2.4445	0.388248	-1.83454	0.00160981	0.484009	0.730583
Glyma.01G167300	135.096	104.647	17.2799	-2.00035	2.87717e-37	-0.343232	0.0958454		331.414	269.822	52.4721	-1.49718	8.55519e-13	-0.390202	0.341363
Glyma.01G167400	0.726635	1.03343	0.720944	0.125324	0.912352	0.495809	0.8872		0.0856275	0.121034	0.228923	1.70517	0.276252	0.570079	0.938692
Glyma.01G167500	20.8962	17.9868	12.619	0.0960843	0.726568	-0.199157	0.767502		54.1799	43.1359	31.1477	0.393831	0.00987959	-0.424899	0.0542094
Glyma.01G167600	15.7788	14.7455	14.8879	0.626964	0.000458103	-0.0832938	0.89027		10.5759	13.5422	8.15381	0.140142	0.530088	0.261442	0.594304
Glyma.01G167800	13.8403	13.1558	11.9495	0.506185	0.522332	-0.0593629	0.992393		32.2691	37.9028	23.381	0.18293	0.706337	0.125348	0.951044
Glyma.01G167900	1.72277	2.1675	0.090772	-3.96521	3.2948e-06	0.328746	0.806403		1.42092	2.11879	0.279024	-1.94674	0.00343725	0.490236	0.716692
Glyma.01G168000	18.245	20.8821	6.92321	-0.991116	0.000113316	0.235965	0.688738		63.1854	65.9603	22.9986	-0.651662	5.23296e-06	-0.0335105	0.958415
Glyma.01G168100	71.3727	88.1833	0.768806	-6.23689	1.3749e-82	0.323404	0.0796276		14.6778	17.0397	0.0515779	-7.44969	4.62038e-18	0.116989	0.795942
Glyma.01G168200	17.4456	18.2726	13.2885	0.145422	0.331776	0.0959405	0.820202		7.15624	6.78112	5.69689	0.607648	0.000149981	-0.165705	0.697807
Glyma.01G168300	0.353603	0.25686	1.05829	2.67578	0.00585409	-0.388278	0.916481		0.335169	0.308064	1.58471	3.23026	0.000287191	-0.180148	0.9755
Glyma.01G168400	8.15903	9.38028	1.54371	-1.99554	1.93265e-07	0.220235	0.806517		16.3637	16.8741	6.08529	-0.610713	0.0103336	-0.0438943	0.966034
Glyma.01G168500	25.0138	37.4727	165.224	2.74669	9.80723e-103	0.606523	0.000801074		19.3321	24.6889	78.6126	2.53467	8.51897e-99	0.254652	0.328344
Glyma.01G168600	16.6722	16.5905	16.1499	0.571725	5.45451e-07	0.0115634	0.987947		7.64852	9.31294	11.5086	1.15373	5.63872e-08	0.19071	0.780044
Glyma.01G168900	43.9268	41.7457	26.7159	-0.0359312	0.747414	-0.0459227	0.890579		12.3782	13.4016	6.86546	-0.114211	0.559404	0.0210932	0.987311
Glyma.01G169000	36.835	32.0921	32.9351	0.642911	1.67047e-07	-0.171365	0.518196		14.0766	13.9299	11.8532	0.617876	7.83261e-05	-0.1049	0.846932
Glyma.01G169100	9.63167	9.32739	12.3694	1.0146	3.12091e-11	-0.0269668	0.969839		5.72193	7.02066	6.06903	0.64071	0.000901878	0.188251	0.732229
Glyma.01G169200	1.17357	1.73175	0.066377	-4.09852	0.000721863	0.569204	0.739806		2.1295	2.27875	0.170124	-2.80288	0.000294936	-0.0239805	1
Glyma.01G169300	9.05442	14.5288	2.61119	-1.88405	0.0413075	0.678028	0.735172		2.31118	2.19273	0	-3.04517	0.068465	-0.199683	0.976887
Glyma.01G169400	20.6152	25.6496	4.28563	-1.95995	3.58467e-13	0.338878	0.456189		26.5194	30.6971	3.03329	-2.46644	1.49215e-31	0.116976	0.798311
Glyma.01G169500	6.32837	6.13318	0.939914	-2.11667	6.46618e-05	-0.0388476	0.989161		13.5525	14.4471	1.01633	-2.89425	2.48049e-19	-0.0069773	1
Glyma.01G169700	20.3814	21.2282	19.9965	0.522514	0.00356096	0.0661617	0.914248		42.4288	45.1541	25.4585	0.0453878	0.790202	-0.00982719	1
Glyma.01G169800	11.0692	10.1993	11.1267	0.734257	1.33124e-07	-0.0923077	0.832471		7.86139	9.51265	7.63302	0.535883	0.0127902	0.165325	0.808883
Glyma.01G169900	19.6725	19.6435	17.5197	0.448914	0.00307653	0.0114264	0.992908		10.4752	9.66559	8.69029	0.711515	9.7155e-05	-0.209686	0.653915
Glyma.01G170000	1.65602	1.68012	0.320394	-1.74964	0.000871242	0.0487339	0.985422		2.00327	2.76138	0.316826	-2.19854	0.000101616	0.363883	0.741611
Glyma.01G170100	16.0376	15.8319	3.30864	-1.66772	1.60986e-06	0.00529608	1		4.39371	4.8243	1.10604	-1.26065	0.00361448	0.0361995	0.992848
Glyma.01G170200	72.1475	60.7002	29.0866	-0.463869	0.0254115	-0.22743	0.628153		34.74	33.1365	17.7801	-0.0317013	0.837457	-0.162942	0.627937
Glyma.01G170300	1.32146	0.782935	4.93626	3.23208	3.34527e-09	-0.73318	0.589772		9.72298	10.7481	45.9879	2.96157	8.88169e-44	0.0840156	0.937311
Glyma.01G170400	15.9902	13.1565	11.4924	0.40377	0.121952	-0.255574	0.677924		12.0515	11.2489	11.5906	0.913411	1.48861e-06	-0.204616	0.692045
Glyma.01G170500	1.33072	0.483314	1.85437	2.49026	0.00624472	-1.3871	0.467973		0.0437942	0.226257	0.445665	1.96962	0.234164	1.68915	0.776013
Glyma.01G170600	39.1252	34.9406	33.8315	0.56068	1.18404e-08	-0.142422	0.492631		26.8342	27.736	15.4014	0.0115684	0.940866	-0.0471957	0.925585
Glyma.01G170700	30.0731	48.0393	2.54703	-3.61861	1.61448e-109	0.693975	1.08195e-06		13.0996	16.4514	0.696406	-3.69367	7.56162e-32	0.231633	0.578615
Glyma.01G170900	14.8084	14.654	8.71698	-0.126892	0.678447	-0.000149791	1		25.1466	22.5092	7.3884	-0.734588	0.000859489	-0.261629	0.547113
Glyma.01G171000	12.7111	17.0182	16.5894	0.570908	0.000513645	0.446055	0.0933291		1.51933	1.62738	1.58226	0.805681	0.010457	0.0215361	0.999803
Glyma.01G171300	1.05102	1.16941	0.122223	-2.61277	0.0632085	0.135883	0.977378		1.22883	1.00947	0.258251	-1.17416	0.148263	-0.373353	0.863825
Glyma.01G171400	2.61124	1.18175	2.79669	1.87116	0.000212572	-1.11409	0.191564		2.01109	2.14472	3.26446	1.45706	1.94314e-05	0.00753343	1
Glyma.01G171700	0.641715	1.21462	0.114455	-2.73066	0.123626	0.935354	0.82462		0.391567	0.480367	0.10994	-1.22003	0.448709	0.131831	0.990306
Glyma.01G171800	5.31361	4.7912	7.43003	1.25423	9.75178e-07	-0.147401	0.863944		4.43535	4.93403	20.2173	2.9006	7.87974e-36	0.079262	0.949614
Glyma.01G171900	19.7039	19.0712	29.419	1.23164	1.13295e-10	-0.0176327	0.990596		12.1922	13.3491	14.3882	0.976904	8.47677e-07	0.0359797	0.974986
Glyma.01G172000	15.0561	11.6838	14.9085	0.963681	1.36379e-08	-0.349218	0.248457		6.58027	5.1796	5.51107	0.943372	1.05162e-05	-0.431137	0.263475
Glyma.01G172100	3.32915	1.52256	0.324141	-1.48386	0.456225	-1.11191	0.798086		0.872938	2.44871	0	-3.76134	0.0154739	1.344	0.640101
Glyma.01G172200	45.8587	60.6704	4.69672	-3.09077	2.19277e-77	0.429372	0.0524293		26.7828	39.6464	4.90544	-2.15405	4.77208e-15	0.474381	0.397418
Glyma.01G172300	18.4204	15.504	7.69573	-0.385577	0.0531174	-0.231595	0.575006		66.2278	61.8215	25.0286	-0.447839	0.00104068	-0.191347	0.499457
Glyma.01G172400	8.40281	6.60238	20.4961	2.229	7.85604e-24	-0.306998	0.566996		12.8347	14.7705	16.9803	1.06796	4.06317e-10	0.100993	0.880711
Glyma.01G172600	3.74088	2.67605	0.0487924	-5.03014	0.000134371	-0.476421	0.730207		4.19503	3.61591	1.45942	-0.43322	0.252053	-0.31242	0.714789
Glyma.01G173000	7.42881	8.17371	8.04014	0.593969	0.000536131	0.157222	0.730328		9.55271	12.1442	19.9754	1.58395	4.9594e-27	0.240178	0.503439
Glyma.01G173200	2.7652	1.50558	47.4566	5.53935	1.83391e-36	-0.789568	0.462066		0.333036	0.276238	14.8072	6.49525	4.48733e-31	-0.395793	0.888009
Glyma.01G173300	23.6362	15.3191	13.5297	0.437096	0.0109331	-0.603181	0.00617867		38.203	33.9479	109.538	2.54906	1.38321e-94	-0.265148	0.28959
Glyma.01G173400	15.4095	14.5516	8.88787	-0.0937372	0.712601	-0.065728	0.935929		5.61677	6.82833	3.14809	-0.252521	0.285336	0.18882	0.752673
Glyma.01G173600	1.53516	2.08534	0.144819	-3.20007	0.000628462	0.493974	0.773428		0.630065	0.81767	0.108102	-2.02944	0.0331661	0.263913	0.915968
Glyma.01G173700	25.2645	28.7136	26.3101	0.492798	0.00255279	0.204252	0.579959		19.6323	24.3205	19.5175	0.548342	2.98751e-05	0.216402	0.434852
Glyma.01G173800	0.0933893	0.0470766	10.8848	8.29284	5.83604e-15	-0.890701	0.815934		0.0560591	0.0168893	2.37546	7.78921	4.39774e-10	-1.41335	0.756731
Glyma.01G174000	20.3486	16.1198	0.772778	-3.78988	2.90674e-44	-0.311658	0.24426		12.0313	9.84443	0.328055	-3.91676	1.01075e-22	-0.385046	0.191865
Glyma.01G174200	3.87488	7.26379	0.334941	-3.81899	2.27329e-08	0.92884	0.207329		2.20809	4.06477	0.172192	-3.63618	4.86454e-09	0.789415	0.114329
Glyma.01G174700	24.5284	29.1569	7.62725	-1.33679	1.09941e-14	0.273594	0.360944		37.9165	33.4956	5.37318	-1.76993	1.56467e-15	-0.277487	0.434031
Glyma.01G174800	22.0985	19.2424	5.87256	-1.13787	0.156353	-0.185304	0.940584		36.1963	38.552	4.49951	-2.14716	0.000139653	-0.0243956	1
Glyma.01G174900	26.6714	27.5002	16.3828	-0.142224	0.468773	0.0710956	0.907505		18.7384	23.9391	14.5624	0.141051	0.427854	0.256046	0.471674
Glyma.01G175100	83.7692	79.3099	77.4442	0.568247	2.67292e-07	-0.051981	0.888386		84.8831	92.4747	47.4623	-0.100547	0.376692	0.029881	0.952378
Glyma.01G175200	6.16755	4.0311	2.12086	-0.298114	0.362662	-0.594207	0.223529		6.02723	4.04822	2.36993	0.105072	0.739516	-0.681055	0.0886966
Glyma.01G175300	46.0009	36.8982	0.388423	-5.97004	4.45817e-75	-0.293971	0.0635515		43.8538	38.4287	0.37191	-5.83075	2.34294e-56	-0.28621	0.112237
Glyma.01G175400	11.8248	12.5564	6.30622	-0.374871	0.137288	0.116126	0.882677		5.6971	6.8726	4.87878	0.368814	0.263118	0.15443	0.894614
Glyma.01G175500	34.2255	44.3448	52.7676	0.861707	3.79959e-11	0.397532	0.0422002		14.3811	17.1854	17.5778	0.88864	2.14721e-06	0.166594	0.776194
Glyma.01G175600	39.655	28.937	13.3933	-0.507219	0.000245128	-0.428319	0.0189162		64.2238	57.0132	22.8009	-0.464402	6.26031e-06	-0.267879	0.0672714
Glyma.01G175700	461.83	590.468	1075.13	1.47295	2.05976e-73	0.378545	0.000241097		127.41	178.308	185.582	0.919956	6.4997e-24	0.388587	0.00129248
Glyma.01G175900	20.7158	23.1382	10.946	-0.468254	0.00229017	0.173838	0.602629		35.9025	40.7445	16.4746	-0.4376	0.0035948	0.0869174	0.860327
Glyma.01G176000	20.3903	18.2012	19.0853	0.678949	5.30758e-08	-0.137667	0.649895		8.09475	9.29405	9.60783	0.902064	2.63746e-07	0.117169	0.854623
Glyma.01G176100	0.63397	1.31713	0	-2.8691	0.237117	1.10145	0.881302		0.662516	0.634455	0.134517	-1.51643	0.390274	-0.163156	0.985599
Glyma.01G176200	4.43827	4.01167	1.43676	-0.871758	0.0981354	-0.103851	0.953437		4.58804	5.30539	1.79388	-0.6555	0.167233	0.0912539	0.964556
Glyma.01G176300	4.27559	3.3418	2.88604	0.367236	0.414555	-0.327687	0.778703		6.86211	6.96164	3.71294	-0.0436212	0.898697	-0.0858889	0.943076
Glyma.01G176400	20.4194	14.7685	1.52593	-2.68721	8.04046e-41	-0.444113	0.0659971		9.98143	7.45713	0.390338	-3.37071	1.48402e-25	-0.518955	0.022302
Glyma.01G176600	116.364	105.055	57.9351	-0.252071	0.022604	-0.122839	0.616836		43.0145	42.1241	25.2415	0.122338	0.319607	-0.123631	0.689911
Glyma.01G176700	19.8803	19.4222	17.2722	0.437483	0.00188692	-0.00486529	0.998718		3.15675	3.75891	2.1787	0.0654145	0.801981	0.161351	0.824844
Glyma.01G176800	39.2969	31.8125	27.9777	0.424038	0.00115794	-0.282932	0.185001		77.3698	71.2417	33.4523	-0.227662	0.0363375	-0.214376	0.233607
Glyma.01G176900	15.9743	16.9188	7.8387	-0.508146	0.0334201	0.107381	0.88604		12.3676	12.6345	4.45928	-0.641053	0.00257736	-0.0607213	0.940066
Glyma.01G177200	1.52007	1.95013	1.59623	0.276682	0.688263	0.425043	0.830957		2.9988	3.26512	3.13951	0.814637	0.0143895	0.0366533	0.990066
Glyma.01G177300	12.6083	13.1638	7.0495	-0.291619	0.139329	0.0854037	0.88993		21.3616	21.1806	8.96196	-0.36601	0.0898603	-0.120351	0.860076
Glyma.01G177400	3.12175	4.40302	8.41596	1.54141	7.7278e-12	0.537902	0.197036		1.75847	2.62325	2.85006	0.984321	0.000481993	0.480349	0.451873
Glyma.01G177500	2.06741	3.38877	0.0967918	-4.55184	0.000111619	0.717335	0.579561		1.59243	4.66306	0	-6.25569	1.74028e-06	1.51902	0.082478
Glyma.01G177600	3.95315	4.22519	6.6072	1.23879	0.000836669	0.111764	0.937729		12.318	10.9085	6.94072	0.191491	0.469555	-0.262566	0.673755
Glyma.01G177700	22.9712	20.1452	54.3605	2.04687	9.5444e-72	-0.16971	0.511158		17.4132	19.0459	38.388	1.86778	2.90856e-37	0.0376265	0.961987
Glyma.01G178000	33.9388	45.3583	66.2388	1.16499	1.17368e-14	0.435207	0.0842522		53.2964	65.0371	72.3247	1.01063	1.52496e-21	0.190636	0.398926
Glyma.01G178100	8.48183	9.13003	11.6978	0.973667	3.15409e-06	0.123606	0.857003		3.66582	4.68483	3.91169	0.594827	0.0197275	0.268511	0.696559
Glyma.01G178200	34.868	35.5418	26.6767	0.200301	0.162193	0.0496813	0.917156		99.4955	94.268	46.3033	-0.167693	0.118004	-0.171981	0.391212
Glyma.01G178300	1.9275	1.34834	0.217587	-1.97288	0.189608	-0.486359	0.892054		0.343353	0.174672	0.150449	0.485275	0.81936	-0.901543	0.890709
Glyma.01G178400	13.8148	12.8188	5.84919	-0.521068	0.0610497	-0.0861487	0.923355		3.30729	3.67984	1.47938	-0.458084	0.141999	0.0604995	0.96336
Glyma.01G178500	9.47019	5.3717	38.3755	3.45083	4.5434e-30	-0.77105	0.134197		4.91075	3.10987	10.6988	2.62089	1.51106e-13	-0.7254	0.30793
Glyma.01G178600	28.163	33.5222	20.9176	-0.0709523	0.758427	0.266439	0.566054		26.1815	31.8566	20.4571	0.230656	0.172271	0.18625	0.650157
Glyma.01G178700	3.58812	4.56403	0.547324	-2.46382	9.39364e-05	0.368769	0.775957		6.22329	7.11578	0.897595	-2.10683	5.86309e-08	0.117429	0.917894
Glyma.01G178800	7.24148	6.04109	0.314996	-3.63824	8.48159e-18	-0.240415	0.669525		4.95347	5.54889	0.560498	-2.4718	1.95445e-10	0.0898332	0.933518
Glyma.01G179100	5.042	5.71183	5.16715	0.44097	0.146368	0.214518	0.806112		1.24708	0.982044	1.14652	1.08686	0.00594472	-0.43946	0.667922
Glyma.01G179200	5.1256	5.29419	0.797653	-2.12814	0.000331261	0.0945644	0.961032		1.25449	1.15274	0.0379517	-4.17303	0.00164223	-0.233832	0.913308
Glyma.01G179300	41.2195	31.4553	4.90807	-2.08337	1.01976e-52	-0.365449	0.0422002		12.5306	12.8431	1.17677	-2.60596	1.3754e-40	-0.0578769	0.922316
Glyma.01G179400	0.267015	0.280388	132.92	9.51972	1.99203e-37	0.109525	0.986819		0.479974	0.304348	69.5339	8.60308	3.54148e-69	-0.540167	0.787058
Glyma.01G179800	24.0894	22.1313	35.9129	1.30907	5.42367e-35	-0.102165	0.724455		10.1562	11.8957	16.3002	1.31326	6.1752e-19	0.135724	0.77839
Glyma.01G179900	22.9268	21.5959	115.416	3.02918	4.80045e-112	-0.0617482	0.897399		8.7175	9.42397	72.9941	3.81951	2.89604e-155	0.0233293	0.982936
Glyma.01G180000	26.369	30.1547	1.85607	-3.41663	4.82548e-54	0.21362	0.494593		13.1495	14.6083	1.44734	-2.45359	1.53051e-25	0.0599589	0.923716
Glyma.01G180100	32.9454	29.151	15.9964	-0.254488	0.00350393	-0.153765	0.314274		6.40301	6.40535	2.70628	-0.384781	0.0110226	-0.0929703	0.837963
Glyma.01G180200	10.2141	13.7746	2.02862	-2.15545	2.93574e-16	0.459732	0.254115		5.38352	6.69626	0.843564	-2.15241	1.25689e-12	0.227848	0.710776
Glyma.01G180300	1.30227	1.85216	0	-3.85413	0.031329	0.528468	0.911892		0.21039	0.334065	0.0873144	-0.687127	0.794744	0.414908	0.973424
Glyma.01G180400	5.22769	4.71486	1.49148	-1.04075	0.0019185	-0.137988	0.890232		48.8637	53.2004	4.95977	-2.57742	3.91894e-30	0.0305102	0.970425
Glyma.01G180500	24.0559	31.4513	36.7536	0.847374	0.00222033	0.39911	0.512643		13.7027	16.4884	13.8266	0.616061	0.00436394	0.154301	0.829723
Glyma.01G180600	3.71509	2.89965	0.169258	-3.50177	0.000631472	-0.325634	0.859832		1.38758	1.17815	0.113451	-2.43674	0.00546837	-0.324266	0.850068
Glyma.01G180700	8.44791	6.96816	29.8708	2.72178	7.82243e-33	-0.256524	0.695119		4.36624	4.93196	18.1907	2.76073	2.11011e-21	0.0662999	0.97035
Glyma.01G180800	186.65	160.229	861.701	3.03623	1.95782e-251	-0.193553	0.244572		303.423	320.99	3082.27	4.12337	0	-0.0132094	0.97424
Glyma.01G180900	37.8291	23.75	6.01913	-1.3988	0.00108607	-0.633009	0.310338		15.0004	8.67457	0.313069	-3.85184	0.0040834	-0.890194	0.457966
Glyma.01G181000	116.772	113.947	41.2054	-0.846458	1.09245e-05	-0.019727	0.986254		26.2357	24.4337	17.4204	0.374999	0.0878516	-0.193833	0.752489
Glyma.01G181100	15.6479	20.5765	163.74	3.61564	7.24378e-78	0.419097	0.288667		2.26936	2.20061	18.5293	3.94066	2.53277e-30	-0.155562	0.922316
Glyma.01G181200	48.2361	38.764	26.5178	0.0568021	0.696124	-0.294795	0.165161		48.2934	46.0957	22.6915	-0.162121	0.199566	-0.163084	0.534086
Glyma.01G181500	25.217	24.4961	6.08971	-1.40267	5.73023e-15	-0.0220041	0.979613		22.1512	23.8905	3.655	-1.8416	6.06778e-25	0.00780427	1
Glyma.01G181700	8.85136	7.59858	0.182647	-4.77771	3.15754e-11	-0.210557	0.817265		8.38135	9.94676	0.0362992	-6.89245	2.23403e-08	0.150499	0.866082
Glyma.01G181800	0.077472	0	3.28626	6.90017	2.41407e-07	-0.850609	0.886828		0	0.0816798	1.40674	4.87866	3.34619e-06	2.44992	0.496383
Glyma.01G181900	3.81092	6.79226	3.08238	-0.520855	0.0317515	0.861933	0.00731854		1.16477	1.77203	0.892787	-0.148048	0.784935	0.495601	0.700229
Glyma.01G182000	44.8077	41.1469	22.5815	-0.2619	0.0133956	-0.10153	0.685078		8.73119	10.5987	6.08754	0.0556198	0.710036	0.186512	0.528713
Glyma.01G182300	12.787	11.1394	3.98813	-0.868587	0.00325976	-0.177608	0.818623		30.5268	31.4666	5.75457	-1.5702	2.3113e-14	-0.0447061	0.954601
Glyma.01G182400	5.26294	5.96983	13.9957	1.84143	1.5836e-19	0.208666	0.714284		2.42669	2.79149	4.48008	1.5337	2.93864e-10	0.112378	0.914484
Glyma.01G182500	16.9001	13.2811	29.7478	1.76214	2.9903e-17	-0.310717	0.513841		28.9142	24.0946	53.7882	2.02148	2.52371e-61	-0.359238	0.0790758
Glyma.01G182600	8.85195	9.5019	18.8645	1.58363	1.85094e-06	0.131576	0.917738		26.8909	30.5051	126.242	2.91265	1.06927e-61	0.0844881	0.910711
Glyma.01G182700	13.2493	20.3491	79.9291	2.57806	2.02288e-135	0.639609	4.20932e-06		6.76294	8.87966	23.9046	2.27951	6.09096e-23	0.330163	0.618409
Glyma.01G183000	16.3245	24.3676	1.71131	-3.24825	5.82723e-16	0.604473	0.248229		19.6941	26.4202	1.34781	-3.38762	1.22194e-31	0.339574	0.293785
Glyma.01G183100	38.3787	35.2524	5.06744	-2.18634	1.34086e-31	-0.0970902	0.845511		44.3804	47.9054	8.79309	-1.59718	1.20024e-28	0.0124998	0.993722
Glyma.01G183200	4.56788	9.59011	2.68505	-1.2277	0.0304453	1.11482	0.22656		1.64633	4.53862	1.17582	-1.09723	0.0870551	1.42476	0.130892
Glyma.01G183300	26.7612	26.338	29.7246	0.816437	0.0452495	0.00414269	1		9.87881	11.8952	18.5407	1.4945	3.66925e-13	0.169844	0.805978
Glyma.01G183400	27.8043	26.1778	13.0713	-0.392302	0.0111609	-0.0688054	0.888386		5.80346	6.82732	4.86952	0.36817	0.113531	0.129663	0.874693
Glyma.01G183500	25.3231	27.6823	39.3905	1.11779	1.00872e-34	0.147316	0.441394		20.2746	21.2991	17.7372	0.594452	0.000103851	-0.0174382	0.989128
Glyma.01G183600	19.107	19.6703	52.3784	2.02813	4.22303e-52	0.0587823	0.90397		17.1185	23.0218	32.8915	1.3716	7.62541e-17	0.333368	0.31749
Glyma.01G183700	17.1682	13.1049	22.713	1.42131	4.78201e-10	-0.385874	0.405444		5.8327	4.89489	4.14161	0.620866	0.0263632	-0.363706	0.552074
Glyma.01G183800	12.9943	9.27551	6.05445	-0.0205205	0.923045	-0.452919	0.106033		8.94044	8.04655	4.52758	0.0369936	0.900605	-0.253889	0.705735
Glyma.01G183900	3.93692	7.17152	0.086772	-5.76012	1.90576e-10	0.891474	0.0821277		2.55162	3.95965	0.0285551	-6.36276	3.56313e-07	0.541313	0.431732
Glyma.01G184100	1.07475	0	0	0	1	-2.78541	0.741033		1.61466	0.843249	0.129381	-1.88561	0.26029	-1.07955	0.730621
Glyma.01G184300	11.8117	10.7248	1.59945	-2.14314	8.53759e-18	-0.117969	0.849797		5.49861	5.52703	1.13503	-1.45056	2.20309e-06	-0.100106	0.918813
Glyma.01G184400	16.1652	15.5971	10.0735	-0.0200808	0.927681	-0.0268879	0.977371		11.5988	14.9732	6.47265	-0.344724	0.0952973	0.263902	0.53891
Glyma.01G184500	0.36083	0.268262	1.75742	3.31173	3.06407e-19	-0.409071	0.7045		0.226641	0.175392	0.965638	3.33038	1.88669e-11	-0.468648	0.797561
Glyma.01G184600	1.25765	1.66596	24.654	4.4583	1.72089e-52	0.456655	0.600315		0.507681	0.676875	11.1413	4.94397	4.36907e-49	0.228296	0.893224
Glyma.01G184700	28.5681	25.8367	7.29918	-1.21133	3.69274e-16	-0.123414	0.728588		6.86018	6.3257	2.04478	-0.775612	0.000121623	-0.210311	0.626805
Glyma.01G185200	31.1604	28.36	4.44494	-2.07297	2.83679e-27	-0.110527	0.817168		19.1872	18.3306	4.28658	-1.22405	1.85562e-07	-0.158452	0.812578
Glyma.01G185300	20.2544	16.347	20.2483	0.919838	1.11882e-13	-0.289405	0.164195		25.1806	21.7006	57.0379	2.25335	2.29399e-61	-0.310894	0.237168
Glyma.01G185400	3.7827	3.0242	16.4708	3.08457	1.43025e-16	-0.305804	0.80212		3.09032	2.57628	11.1327	2.98974	7.9855e-21	-0.386851	0.689765
Glyma.01G185500	24.7378	35.066	0.0755667	-8.11841	2.88867e-11	0.525945	0.129081		52.5344	75.4401	0.688141	-6.01071	6.54045e-42	0.431031	0.055233
Glyma.01G185600	1.09479	2.27765	1.50551	-0.00570446	0.997032	1.10369	0.594269		1.69415	2.51481	3.62241	1.38528	0.000797375	0.502257	0.679311
Glyma.01G185700	20.7575	20.8839	9.09724	-0.586746	2.60298e-05	0.028819	0.955598		12.4565	12.3752	5.63449	-0.26599	0.141649	-0.102487	0.853918
Glyma.01G185800	7.13063	4.72126	13.3468	2.12043	1.94768e-09	-0.562391	0.45492		3.45285	3.67863	5.27726	1.3655	5.17063e-05	-0.0113978	1
Glyma.01G185900	13.7045	17.1438	163.338	3.88074	6.2145e-123	0.322985	0.405424		18.3257	20.2308	128.237	3.52825	2.22011e-170	0.0476806	0.939776
Glyma.01G186000	103.849	109.882	166.238	1.20387	2.59625e-32	0.108237	0.671007		69.0684	88.1305	61.6045	0.342437	0.000356987	0.257339	0.0823802
Glyma.01G186100	33.3795	39.936	20.7708	-0.338572	0.0673391	0.282387	0.415966		27.1459	30.7749	7.44505	-1.17906	4.17473e-11	0.0858524	0.885945
Glyma.01G186200	1.36961	1.72273	0.668381	-0.758231	0.0266399	0.359983	0.627053		0.857532	0.956693	0.300834	-0.727211	0.364497	0.0527853	0.99755
Glyma.01G186300	9.0397	9.9399	12.7288	0.968221	0.000844762	0.149778	0.878633		5.60354	5.83475	6.419	0.996751	2.92508e-05	-0.0537246	0.965485
Glyma.01G186400	42.7438	36.93	33.2554	0.459179	0.000103277	-0.188852	0.414626		47.6361	49.1436	21.595	-0.326293	0.00478636	-0.0494702	0.904105
Glyma.01G186600	29.8237	31.1501	17.7341	-0.201368	0.132563	0.0824852	0.830073		37.3313	44.0607	43.6163	0.849237	3.29523e-09	0.147837	0.720104
Glyma.01G186800	56.2677	84.8103	5.13422	-3.42205	3.94608e-37	0.608025	0.0181057		168.135	196.417	15.2544	-2.80509	7.73551e-86	0.129766	0.689438
Glyma.01G187200	8.81567	8.70853	8.47142	0.555625	0.0102722	0.0117552	0.995318		14.1636	15.2904	6.65096	-0.325443	0.0723821	0.0124697	0.998027
Glyma.01G187300	17.5908	21.7442	7.00953	-1.01914	1.26448e-09	0.328171	0.21986		8.04094	10.278	3.92243	-0.530173	0.00348499	0.253205	0.485387
Glyma.01G187400	94.7402	69.3034	1.63702	-4.79937	1.91088e-296	-0.425697	1.39831e-05		32.1267	29.7485	1.08013	-3.92127	7.60067e-100	-0.206272	0.357914
Glyma.01G187600	8.80107	13.4239	2.0264	-2.13267	8.35247e-14	0.635117	0.0842342		6.40986	8.91353	0.411883	-3.44751	5.89227e-13	0.389549	0.528484
Glyma.01G187700	1.98077	5.54149	0.0537851	-5.92936	5.96798e-06	1.50067	0.083256		6.49256	8.17992	0.302423	-3.85184	5.38273e-09	0.224564	0.815873
Glyma.01G187800	3.91	3.00012	6.29421	1.67429	6.98534e-07	-0.345894	0.704711		1.91689	2.44532	10.1105	2.91153	2.6913e-16	0.273138	0.860076
Glyma.01G187900	4.69907	5.5503	0.163195	-4.47954	3.82949e-11	0.270811	0.771474		4.30727	5.40592	0.256095	-3.44965	9.11123e-10	0.252409	0.784817
Glyma.01G188000	37.1631	27.5353	7.58268	-1.25792	7.28509e-28	-0.406857	0.0031979		18.8236	15.8684	3.3206	-1.40545	1.60272e-17	-0.343637	0.100332
Glyma.01G188100	31.105	23.4063	80.6638	2.3921	1.17796e-62	-0.382578	0.121197		22.8843	21.1194	83.6718	2.84921	4.09583e-76	-0.216041	0.601706
Glyma.01G188200	31.1678	33.4275	3.52483	-2.6305	1.99623e-68	0.12359	0.683528		11.7054	12.9543	1.74447	-2.01006	2.60576e-27	0.0514086	0.92664
Glyma.01G188300	0	0.323023	6.56898	5.04186	1.93478e-05	1.97317	0.605542		0	0	1.72727	6.79295	6.49843e-07	0	1
Glyma.01G188400	75.528	67.7174	31.5378	-0.492648	1.33537e-05	-0.137404	0.568526		37.381	36.7304	10.0646	-1.00851	2.39099e-14	-0.121697	0.712838
Glyma.01G188500	8.29347	5.07645	31.4826	3.24533	5.21969e-82	-0.693477	0.00623433		20.252	12.5048	63.1584	3.2043	5.22414e-99	-0.800146	6.98444e-05
Glyma.01G188600	15.6617	18.9785	28.1826	1.17157	2.64135e-09	0.302069	0.509253		9.21506	11.8096	17.8248	1.4616	1.93109e-13	0.260329	0.625719
Glyma.01G188700	48.5268	48.6981	36.8443	0.203148	0.0957935	0.0306724	0.944595		28.481	35.4078	19.5683	0.0106756	0.956522	0.221082	0.533454
Glyma.01G188800	10.3644	11.0045	1.75882	-2.06554	7.79334e-06	0.108679	0.933783		6.52317	6.98909	1.94639	-0.967074	0.00371628	0.0124281	1
Glyma.01G188900	17.4939	19.5253	10.4516	-0.284974	0.0978277	0.173583	0.658911		40.1035	40.2652	21.6407	-0.0293789	0.853983	-0.0919645	0.840576
Glyma.01G189100	20.4302	24.8503	48.4015	1.57746	1.34689e-23	0.303008	0.358878		25.604	28.8462	20.4367	0.356891	0.0623119	0.0792312	0.914608
Glyma.01G189200	16.2037	18.3133	6.43074	-0.896132	3.07209e-06	0.20174	0.633215		7.2721	8.11594	2.94877	-0.615166	0.00552886	0.0610547	0.94191
Glyma.01G189300	0.866448	0.584979	2.19995	2.57717	0.00272227	-0.610535	0.828524		0.417144	0.417121	0.917666	1.97592	0.0127319	-0.176771	0.967062
Glyma.01G189400	14.1662	14.7602	7.28301	-0.392098	0.153382	0.0556439	0.956543		24.0384	24.8376	10.5848	-0.364318	0.086026	-0.0379286	0.970894
Glyma.01G189500	14.4682	11.2843	10.2232	0.456291	0.00825065	-0.330188	0.267441		11.5295	9.76427	5.23159	-0.0316203	0.90068	-0.334106	0.440737
Glyma.01G189600	12.2603	16.7317	10.0578	-0.124995	0.640217	0.456672	0.316275		5.59137	8.53811	4.37021	-0.115571	0.655664	0.494582	0.219498
Glyma.01G189700	17.1007	19.2325	0.159353	-6.34293	4.74847e-13	0.195109	0.758142		9.25254	10.2732	0.0546407	-6.46821	1.4102e-09	0.0420214	0.971886
Glyma.01G189800	0	0.35164	0.458528	0.996818	0.456873	3.28715	0.262874		0.401064	0.607942	3.1154	3.19687	4.2006e-08	0.646538	0.782139
Glyma.01G190000	36.4778	35.2291	0.207334	-6.75953	4.3117e-19	-0.0305266	0.974286		47.668	46.3698	0.353171	-6.12562	1.92474e-33	-0.133595	0.772527
Glyma.01G190100	25.2752	45.4226	13.2823	-1.14685	6.14629e-06	0.860408	0.0105285		37.925	56.4782	11.4284	-1.45387	1.48394e-10	0.480645	0.230527
Glyma.01G190300	8.40927	9.78167	10.669	0.732732	0.0405221	0.252358	0.816368		3.23988	6.59296	1.84867	-0.933274	0.0291823	0.923473	0.13745
Glyma.01G190500	16.3821	14.3036	0.864759	-3.47757	1.3212e-07	-0.165167	0.895435		58.3482	51.4021	5.88853	-2.23564	3.72842e-21	-0.286436	0.440776
Glyma.01G190600	3.33845	2.83847	0.0512986	-5.03488	0.000137188	-0.23596	0.896489		3.60049	2.90318	0	-6.5242	1.86822e-07	-0.396086	0.646773
Glyma.01G190700	19.4748	22.1522	11.6267	-0.319738	0.158568	0.20087	0.71376		12.0196	11.9875	9.73289	0.549337	0.00421627	-0.0935442	0.89653
Glyma.01G190800	12.181	11.5014	12.9255	0.782018	5.3743e-07	-0.062979	0.907862		4.83326	4.7183	3.95497	0.595374	0.0183081	-0.1246	0.892693
Glyma.01G190900	12.6781	14.0466	0.309822	-4.89519	4.45967e-12	0.168703	0.849149		176.428	163.858	5.68641	-3.99754	3.857e-117	-0.202141	0.332869
Glyma.01G191100	19.3665	17.4985	29.8362	1.38199	5.34978e-47	-0.125463	0.583998		6.44805	7.07726	8.49225	1.11517	1.32028e-11	0.0423748	0.960565
Glyma.01G191200	4.78976	3.6625	135.547	5.83644	1.91718e-86	-0.375238	0.674706		4.22735	2.7732	85.2584	5.7778	5.13048e-93	-0.670315	0.260993
Glyma.01G191300	0.445497	1.07361	9.50539	3.75081	5.79336e-19	1.3082	0.217926		0.383722	0.902838	4.4689	3.16691	4.34838e-12	1.1345	0.394528
Glyma.01G191400	2.07126	1.47388	0	-4.7703	0.000870852	-0.493234	0.840323		2.57292	2.35559	0	-6.10256	1.62135e-06	-0.214422	0.891221
Glyma.01G191500	19.6872	23.2476	23.3246	0.615086	2.35139e-05	0.262153	0.352124		1.1714	1.46035	1.68397	1.02689	0.00952761	0.225095	0.882679
Glyma.01G191600	8.54931	15.3359	110.441	3.45667	2.05958e-95	0.864229	0.000714235		7.84379	12.0219	64.6256	3.28632	1.16635e-61	0.513869	0.183269
Glyma.01G191700	2.0227	1.86818	0.294942	-2.04102	0.00134359	-0.0914974	0.968144		0.747799	0.969212	0.11286	-2.3103	0.0390305	0.268287	0.932863
Glyma.01G191800	11.6072	11.3717	4.56705	-0.7124	9.0981e-07	-0.00922414	0.994602		5.17552	5.89481	1.44008	-1.13745	0.000152197	0.0824747	0.94286
Glyma.01G191900	1.64309	1.0821	5.89705	3.06147	9.12427e-15	-0.589625	0.54816		0.774194	0.716523	2.15724	2.4532	8.61972e-10	-0.210397	0.903776
Glyma.01G192000	38.7799	46.1694	22.6513	-0.417677	0.0117045	0.278211	0.352481		97.1329	101.54	47.5188	-0.231675	0.14929	-0.0297409	0.970727
Glyma.01G192100	25.5699	13.5419	20.192	1.18847	1.27538e-14	-0.902922	5.42449e-07		20.0319	12.5422	10.5792	0.618696	0.00456298	-0.772766	0.0054189
Glyma.01G192200	43.9005	34.8051	57.2001	1.31595	1.17138e-24	-0.309064	0.148008		19.6927	16.2636	20.3213	1.18082	1.24515e-22	-0.36598	0.0458045
Glyma.01G192300	5.59582	4.64992	65.6036	4.40852	5.5798e-27	-0.216584	0.879564		3.73537	3.16059	23.5887	3.75298	2.19275e-82	-0.315	0.55071
Glyma.01G192400	1.52153	0.962178	1.28881	1.009	0.125776	-0.641165	0.687211		0.774385	0.801241	1.40384	1.65975	0.0010742	-0.0439673	0.997388
Glyma.01G192500	12.0372	10.7812	1.22552	-2.51395	2.05538e-10	-0.136069	0.890878		13.5349	13.1068	1.86403	-1.90338	1.39786e-09	-0.149193	0.860076
Glyma.01G192600	26.4915	23.2145	117.819	2.95895	1.65624e-53	-0.170016	0.762538		29.8263	25.0094	71.7845	2.38365	1.03783e-54	-0.347014	0.232486
Glyma.01G192700	0.731339	0	17.0169	7.53101	4.31948e-09	-2.33133	0.451459		0	0.0760005	4.16259	6.35786	1.84737e-06	1.00605	0.885187
Glyma.01G192800	5.35861	6.56302	121.975	4.86364	1.77896e-14	0.332893	0.910868		0	0	13.4073	7.14511	2.7051e-07	0	1
Glyma.01G192900	11.897	10.6633	21.3599	1.60595	1.05717e-16	-0.133677	0.829089		5.52905	5.46498	6.00401	0.982548	2.80045e-05	-0.111616	0.902832
Glyma.01G193000	1.01386	0.806214	1.10943	1.05713	0.226736	-0.353781	0.902464		0.495123	0.235443	0.57439	2.10398	0.012966	-1.16912	0.552173
Glyma.01G193100	34.6229	29.1631	0.0595305	-8.28754	1.03639e-11	-0.230467	0.616241		47.1526	40.597	0	-10.1632	4.12315e-17	-0.310958	0.1547
Glyma.01G193200	7.6852	8.86989	3.61664	-0.687127	0.0104227	0.212463	0.756655		3.2369	3.98401	2.50021	0.185086	0.529325	0.187909	0.836487
Glyma.01G193400	0.575321	1.62467	0.0861355	-3.60044	0.0091021	1.51884	0.438177		0.356154	0.685193	0.057079	-2.7437	0.035923	0.80072	0.737376
Glyma.01G193500	21.1694	19.4133	0.320677	-5.31568	4.77204e-59	-0.105028	0.776997		6.54452	5.86788	0.078033	-5.43949	2.21271e-15	-0.256572	0.623324
Glyma.01G193600	13.9153	13.3076	34.2441	1.99259	3.80609e-27	-0.0466086	0.949161		4.76834	4.591	8.63854	1.76294	9.02488e-11	-0.147881	0.891221
Glyma.01G193700	25.138	24.8842	21.7181	0.418957	0.00735144	0.00981757	0.994602		32.6492	27.1882	23.7906	0.665333	0.00115468	-0.355815	0.383852
Glyma.01G193800	53.5405	47.9164	10.5195	-1.59874	2.44141e-09	-0.13968	0.84501		316.661	280.351	37.7003	-2.03153	3.7678e-33	-0.267816	0.443554
Glyma.01G193900	5.99479	7.96914	2.07455	-1.31465	1.29349e-05	0.432028	0.428465		5.01614	5.77262	1.21533	-1.39975	0.00040923	0.108644	0.939218
Glyma.01G194000	1.97366	3.18902	0.221519	-3.23792	8.0551e-05	0.714934	0.544866		0.243711	0.796853	0.0288047	-3.85296	0.0060089	1.62179	0.288643
Glyma.01G194100	38.9541	35.0381	19.0089	-0.276554	0.0193519	-0.131164	0.608313		13.6287	13.3194	7.87866	0.105983	0.557819	-0.139078	0.769551
Glyma.01G194200	11.4481	12.1053	5.08468	-0.630844	0.0282996	0.0904974	0.922603		12.349	12.3264	4.66597	-0.539731	0.0034881	-0.095551	0.872735
Glyma.01G194300	13.0087	15.3002	11.0796	0.148448	0.474564	0.239366	0.587779		3.1814	3.49382	3.04198	0.639819	0.029298	0.028306	0.993189
Glyma.01G194500	19.7236	19.1221	84.0343	2.75317	5.66495e-90	-0.0242895	0.972919		19.4435	20.8803	37.7016	1.71636	4.00398e-20	0.00343329	1
Glyma.01G194600	22.6568	22.1954	24.5927	0.762194	6.17297e-11	-0.0104073	0.990947		14.4422	16.0721	8.97449	0.0197894	0.919121	0.0554643	0.932813
Glyma.01G194700	28.5675	35.209	4.39811	-2.38702	7.57833e-69	0.320732	0.0598039		12.7361	15.2181	2.56503	-1.72627	1.10148e-17	0.169059	0.720977
Glyma.01G194800	13.0991	11.0472	4.06532	-0.8402	1.54884e-06	-0.218976	0.514154		11.1246	11.1491	2.49483	-1.28498	1.2644e-07	-0.104689	0.891463
Glyma.01G194900	10.3558	10.1785	25.8358	1.95368	7.05379e-29	0.00542602	1		8.53654	6.72617	16.4526	2.15581	5.85118e-31	-0.433199	0.230173
Glyma.01G195000	5.94004	5.74545	1.74474	-1.10796	0.00186569	-0.0309508	0.987894		10.2004	8.45032	1.13201	-1.986	1.16261e-10	-0.363437	0.373525
Glyma.01G195100	6.20409	6.26776	0.596602	-2.79964	8.2782e-05	0.047261	0.987946		3.19385	4.73267	0.230033	-3.51973	2.33892e-05	0.451847	0.689265
Glyma.01G195200	33.5138	40.8969	7.24659	-1.89093	1.14989e-27	0.309078	0.224104		13.6975	16.6857	2.53698	-1.86607	6.89932e-16	0.191579	0.740739
Glyma.01G195400	23.5363	23.693	42.8726	1.46146	7.77888e-20	0.0427928	0.947969		20.9776	25.226	36.797	1.40418	1.28249e-26	0.176445	0.613369
Glyma.01G195500	2.32053	1.98876	0.258458	-2.36344	0.000396483	-0.209849	0.89985		2.01129	1.88674	0.196926	-2.4196	0.0002628	-0.179879	0.903776
Glyma.01G195600	0.590409	1.1008	7.48837	3.39725	1.80938e-10	0.91957	0.576961		0.280873	0.323814	3.61493	4.38351	1.14876e-14	0.070503	0.993977
Glyma.01G195900	8.49505	7.98406	0.11991	-5.44535	4.12298e-12	-0.0558733	0.96362		4.66489	5.89622	0.126974	-4.65635	1.78739e-11	0.249494	0.697807
Glyma.01G196000	15.8554	23.4952	11.0512	-0.471734	0.0910505	0.596302	0.179952		25.3638	31.771	5.50001	-1.68854	8.50785e-19	0.23388	0.500029
Glyma.01G196300	16.1263	16.9628	18.8642	0.765709	1.94603e-07	0.0916374	0.845861		19.9319	23.3518	13.7121	0.0893065	0.622721	0.133731	0.790498
Glyma.01G196400	4.64659	7.20294	0.642845	-2.87589	2.98426e-16	0.655136	0.0948501		1.12376	2.27575	0.114233	-3.53495	2.67091e-05	0.919684	0.267349
Glyma.01G196600	6.09237	6.59972	12.9081	1.57927	4.8618e-07	0.129592	0.912598		4.69701	5.91436	12.1058	1.89242	2.22503e-16	0.230458	0.765876
Glyma.01G196700	1.41109	1.45843	0	-3.18706	0.141909	0.0850688	0.995916		0.545782	0.883101	0	-3.11414	0.0667311	0.532805	0.915687
Glyma.01G196800	11.8592	6.62902	3.58689	-0.278967	0.461383	-0.795427	0.123309		9.98658	6.06089	15.3307	2.20327	1.59117e-10	-0.806333	0.189403
Glyma.01G196900	3.25249	2.82906	0.095395	-4.14174	0.00392319	-0.207238	0.943609		2.90013	1.79393	0	-4.80373	0.000325517	-0.803048	0.545476
Glyma.01G197000	10.9409	12.5382	11.9339	0.542252	0.0208539	0.208119	0.742433		0.795282	1.56179	2.54229	1.50392	0.0615491	0.875055	0.730574
Glyma.01G197100	46.4654	38.6804	57.8428	1.18294	4.1688e-21	-0.239063	0.328472		24.3267	20.7006	17.5776	0.618441	1.32341e-06	-0.324939	0.100979
Glyma.01G197200	1.88865	2.57447	0.6252	-1.43357	0.118117	0.456857	0.851177		1.18859	1.42228	0.257201	-1.58691	0.111261	0.172675	0.960565
Glyma.01G197300	1.18792	0.892263	5.08209	3.11523	7.90543e-07	-0.377854	0.872155		0.289932	0.174767	0.692309	2.78303	0.0132301	-0.815661	0.841535
Glyma.01G197400	8.5647	12.4826	0.16584	-5.61376	5.85645e-16	0.568124	0.159713		3.023	4.76517	0.0268222	-6.7286	5.23401e-08	0.560193	0.253237
Glyma.01G197500	4.92688	3.17225	1.06096	-0.986005	0.0541799	-0.586392	0.520521		9.0922	10.9161	5.54954	-0.116344	0.633528	0.158791	0.817196
Glyma.01G197600	24.5192	33.0995	5.60869	-1.9456	1.11671e-27	0.451634	0.0568282		5.85691	6.83692	1.03626	-1.84798	1.41256e-15	0.128761	0.813896
Glyma.01G197800	86.0002	74.4622	26.4677	-0.894413	2.89439e-10	-0.183238	0.535422		42.8221	46.243	10.1613	-1.31778	2.48885e-29	0.0164787	0.98052
Glyma.01G198000	15.472	16.7412	0	-8.23719	3.02875e-11	0.142421	0.891772		7.02205	8.22154	0.0460191	-6.53722	1.31108e-07	0.138154	0.895251
Glyma.01G198100	70.0195	74.988	1.65201	-4.8885	4.50212e-88	0.120134	0.667179		39.5297	36.1325	2.14999	-3.21477	3.47082e-54	-0.220596	0.369038
Glyma.01G198200	0.13095	0.267068	3.62577	4.40614	5.30301e-07	1.10892	0.763198		0.155477	0.232739	1.81236	3.87976	0.0153893	0.381624	0.965647
Glyma.01G198400	0.922038	0	16.4688	5.37967	0.000447849	-0.850608	0.893087		0	0	1.67481	3.88542	0.15164	0	1
Glyma.01G198500	47.438	38.9877	317.889	3.63637	1.22323e-259	-0.254265	0.187895		42.7768	46.9659	372.142	3.84719	0	0.0438638	0.918439
Glyma.01G198600	45.9009	39.9202	29.5879	0.167335	0.301496	-0.178247	0.608979		5.71242	7.17987	5.20663	0.416666	0.225721	0.22081	0.844388
Glyma.01G198700	1.36354	1.06329	0	-3.86328	0.023763	-0.338852	0.940584		2.38801	1.02944	0.0956601	-2.59286	0.0339027	-1.31242	0.21472
Glyma.01G198900	8.13465	7.79444	0.0545588	-6.51087	1.27516e-09	-0.0328366	0.981579		16.0178	16.0565	0.140375	-6.10567	1.06411e-15	-0.0999132	0.901848
Glyma.01G199000	7.95142	7.30789	4.35093	-0.138897	0.525138	-0.100023	0.878407		2.56212	3.31978	1.49001	-0.281739	0.455181	0.247572	0.814647
Glyma.01G199100	32.9479	30.7771	19.2563	-0.0632915	0.727635	-0.0822997	0.878195		40.2762	40.6393	23.7728	0.0938229	0.613644	-0.0798271	0.900431
Glyma.01G199200	7.17574	4.93904	5.37672	0.746323	0.0218714	-0.521681	0.399932		6.11878	4.8534	8.76561	1.72729	5.58745e-10	-0.45204	0.47636
Glyma.01G199300	17.5459	18.3652	9.52643	-0.351132	0.129353	0.089633	0.901266		2.94941	2.87777	1.77012	0.165725	0.670697	-0.113813	0.937231
Glyma.01G199400	0.418927	0.358983	28.1156	6.89291	3.45339e-37	-0.211987	0.934243		0.209841	0.114085	19.5794	8.30728	6.6746e-28	-0.759913	0.808548
Glyma.01G199500	0.090107	0	1.58375	5.39407	0.000541181	-0.850608	0.894716		0.0575043	0.136241	0.535274	2.89629	0.0585572	0.949836	0.895094
Glyma.01G199600	28.5899	25.1084	6.0934	-1.43491	1.23683e-19	-0.160939	0.628678		11.6677	11.316	1.78359	-1.80074	5.55108e-18	-0.1343	0.781916
Glyma.01G199700	27.9642	26.2496	127.09	2.88053	4.67321e-64	-0.0604256	0.928248		93.505	87.6472	368.464	2.93183	3.01004e-158	-0.18969	0.449819
Glyma.01G199900	21.1472	20.8689	24.8755	0.869435	1.26192e-06	0.00229677	1		20.8514	21.1714	10.4313	-0.165673	0.519359	-0.0774905	0.9322
Glyma.01G200000	15.7941	15.8261	7.21994	-0.529637	0.0132842	0.0397321	0.961778		32.7319	34.1994	16.633	-0.166351	0.35776	-0.0323075	0.970425
Glyma.01G200200	7.17724	5.65728	41.4616	3.48872	6.99613e-118	-0.317405	0.32398		2.28098	2.39886	15.3741	3.53204	8.58383e-67	-0.0368638	0.980951
Glyma.01G200300	1.43864	1.48144	0	-4.02026	0.0129666	0.0902929	0.992279		0.609856	0.621926	0	-3.38906	0.0400159	-0.0391711	1
Glyma.01G200500	17.6547	17.7761	8.39385	-0.47903	0.00453183	0.0379178	0.949745		6.82826	10.5415	3.79325	-0.617619	0.00776827	0.524842	0.132212
Glyma.01G200700	14.1811	15.4225	8.9244	-0.175451	0.27797	0.139528	0.719955		21.8917	23.2999	8.39823	-0.612923	0.00097327	-0.00773944	1
Glyma.01G200800	64.1749	57.8093	16.3174	-1.21625	3.20442e-29	-0.126521	0.582917		32.8182	39.074	9.75305	-1.14846	5.91421e-13	0.160093	0.700335
Glyma.01G200900	12.7556	12.0812	4.62192	-0.77503	0.000285833	-0.0559166	0.937794		9.20226	10.2174	3.31177	-0.747775	0.00377282	0.059821	0.95689
Glyma.01G201000	16.4368	16.1929	22.783	1.11463	5.36099e-06	0.00109591	1		160.124	151.426	453.522	2.44253	1.03587e-144	-0.173182	0.412344
Glyma.01G201100	7.88906	7.98805	10.6543	1.03506	0.000389065	0.040654	0.979341		15.2014	15.8054	16.5779	0.941841	5.77765e-06	-0.0387707	0.973424
Glyma.01G201200	6.54081	9.26108	1.80443	-1.7691	0.0885471	0.506028	0.849073		119.802	102.826	34.7291	-0.687536	0.00318691	-0.317044	0.506802
Glyma.01G201300	29.7257	26.6037	10.3464	-0.770985	0.00156474	-0.127332	0.855167		3.73574	4.31144	1.71148	-0.477673	0.341687	0.140234	0.938554
Glyma.01G201400	24.061	24.2159	8.7824	-0.855238	9.12543e-05	0.0322421	0.971308		10.5259	10.8367	4.63788	-0.332345	0.31711	-0.0730867	0.958309
Glyma.01G201500	0	0	5.20981	3.86498	0.0836653	0	1		0	0	0.664783	2.69637	0.472787	0	1
Glyma.01G201600	33.8998	30.0336	29.2888	0.599027	0.0913909	-0.147243	0.898302		0.141875	0.440089	0.674385	1.4158	0.416737	1.45089	0.818813
Glyma.01G201800	14.9232	13.4604	1.35281	-2.70253	1.51898e-12	-0.14396	0.868728		0.672961	0.578031	0.0900985	-1.82529	0.10218	-0.340669	0.902832
Glyma.01G202000	8.29106	9.34544	7.40506	0.267421	0.37285	0.186103	0.829755		7.07338	9.22296	4.38711	-0.224006	0.480444	0.270956	0.739509
Glyma.01G202200	14.0918	13.2125	3.27439	-1.40028	4.02882e-06	-0.0777749	0.93214		0.697802	0.963029	0.342955	-0.594155	0.398893	0.380209	0.854744
Glyma.01G202300	17.0445	13.7601	1.98994	-2.17024	7.48354e-14	-0.288856	0.538018		1.14931	1.84726	0.356241	-1.45252	0.0514745	0.593558	0.712268
Glyma.01G202500	19.588	17.3966	14.064	0.308994	0.103658	-0.146894	0.770386		98.4281	109.385	114.199	0.923703	5.36101e-13	0.0582903	0.909265
Glyma.01G202600	57.4257	47.0456	43.3243	0.486653	2.42245e-09	-0.263314	0.0211061		21.9646	22.0069	16.7982	0.467457	5.39658e-05	-0.091032	0.804287
Glyma.01G202700	3.20031	4.60413	20.3219	2.76351	1.94461e-21	0.504908	0.503135		0.974166	1.63737	3.56987	1.95317	9.66523e-08	0.660434	0.473357
Glyma.01G202800	49.9711	55.9587	51.7601	0.495648	0.0455755	0.19035	0.786609		9.35577	10.3052	7.67825	0.456582	0.225389	0.0474168	0.984392
Glyma.01G202900	63.3547	69.9996	60.027	0.389229	0.00678935	0.166442	0.6178		6.31479	7.72826	4.06576	-0.0799924	0.804598	0.213482	0.80519
Glyma.01G203000	23.0398	25.4272	11.0652	-0.591069	2.00587e-06	0.164703	0.530984		6.29152	7.60585	2.54036	-0.729678	5.04418e-06	0.175288	0.619647
Glyma.01G203100	5.8721	4.24705	172.314	5.95236	0	-0.438043	0.0241761		2.83696	2.62401	78.2462	5.74895	4.08847e-133	-0.173025	0.857295
Glyma.01G203200	12.4887	18.7691	7.16177	-0.786691	0.00131865	0.610502	0.0895547		21.5696	29.1431	17.4427	0.120143	0.549398	0.341492	0.337886
Glyma.01G203300	13.1824	11.2165	34.1702	2.22029	2.03996e-25	-0.209113	0.729875		7.35775	10.5802	15.2263	1.39062	2.55294e-08	0.4232	0.44776
Glyma.01G203400	20.8829	1.40856	34.4863	5.23335	6.9158e-21	-3.87467	7.46631e-10		11.7841	0.867026	13.8975	4.85796	1.43294e-28	-3.8429	1.0294e-15
Glyma.01G203500	0.396394	0.749225	4.70457	3.26154	6.93181e-08	0.993183	0.585907		0.508042	0.25614	1.65604	3.5078	9.68256e-07	-0.928069	0.652439
Glyma.01G203600	26.7066	22.7659	6.6001	-1.18847	4.15965e-06	-0.198853	0.739358		118.985	99.2686	19.8892	-1.44902	6.86124e-11	-0.355167	0.397438
Glyma.01G203700	7.41513	8.58582	2.3746	-1.23928	0.0334606	0.220707	0.897053		6.80371	7.69658	1.36885	-1.70967	0.000255545	0.0998452	0.953791
Glyma.01G203800	31.8973	29.9041	26.9119	0.45681	0.00215052	-0.0769672	0.87303		49.7513	45.1664	41.6582	0.747262	1.76827e-08	-0.234638	0.382686
Glyma.01G204000	31.4226	25.9364	17.3178	0.0234692	0.868856	-0.248908	0.246789		22.3353	21.7649	11.6963	-0.0342544	0.848868	-0.125476	0.787371
Glyma.01G204200	17.1792	17.0879	17.859	0.676446	0.000327823	0.0114917	0.994631		12.7121	14.4927	8.61709	0.100683	0.659327	0.093504	0.904105
Glyma.01G204300	8.67645	7.44415	4.26637	-0.192826	0.441108	-0.199263	0.737981		12.3121	14.9115	3.9376	-1.07151	3.10077e-06	0.170159	0.77839
Glyma.01G204400	21.7326	3.37599	5.85641	1.3928	0.011644	-2.6129	3.63416e-05		7.17873	1.9528	4.91233	2.17305	3.28801e-05	-1.95956	0.00475619
Glyma.01G204500	7.09519	7.16095	8.16193	0.799762	4.13812e-05	0.0442156	0.955897		4.62716	4.32204	2.8447	0.270481	0.505844	-0.164119	0.905333
Glyma.01G204600	0.764707	0.464685	0	-4.2586	0.0108325	-0.652773	0.857086		1.89513	1.38095	0	-5.21439	7.74631e-05	-0.523047	0.734378
Glyma.01G204700	0.342855	0.322125	0	-2.35515	0.363114	0.0199006	1		0.800299	1.65585	0	-4.57646	0.00430774	0.973748	0.771036
Glyma.01G204800	0.237593	0.121732	0.330747	1.97647	0.287542	-0.900376	0.882587		0.122675	0.675752	7.00516	4.22403	0.0211145	2.314	0.665663
Glyma.01G204900	41.0274	50.7192	35.1298	0.0826854	0.472029	0.324843	0.0374645		4.44573	5.64913	3.93489	0.334461	0.0741639	0.243627	0.56202
Glyma.01G205100	6.15646	6.35687	10.487	1.33685	9.06826e-10	0.0548474	0.949682		1.34755	2.72002	4.46954	1.55845	1.51158e-09	0.936826	0.0327329
Glyma.01G205200	26.8619	26.8675	25.4972	0.530133	0.00592419	0.03808	0.961902		47.0768	52.3104	29.2862	0.0237191	0.874346	0.0524491	0.916372
Glyma.01G205300	1.70788	2.74281	0.0815998	-4.42414	3.56139e-06	0.692626	0.473655		1.91758	2.25777	0.108471	-3.42208	0.00348235	0.1382	0.957841
Glyma.01G205400	28.0507	21.7907	41.3597	1.54161	4.27728e-20	-0.345853	0.271795		111.755	104.938	298.374	2.36704	1.11186e-89	-0.182679	0.523147
Glyma.01G205500	0.457516	0.061542	0.13668	1.45296	0.507772	-2.58963	0.532061		1.3437	1.44615	1.04657	0.410077	0.551362	0.0406281	1
Glyma.01G205600	14.9067	12.7984	3.56254	-1.24936	3.64704e-08	-0.196108	0.69074		7.55096	6.41728	1.33961	-1.36977	0.00143857	-0.333363	0.763701
Glyma.01G205700	13.7237	10.3704	35.8958	2.38719	1.05074e-25	-0.355105	0.487158		6.02981	4.89177	28.9341	3.43262	1.13338e-81	-0.41992	0.280386
Glyma.01G205800	3.89766	6.86998	11.52	1.35885	0.0054527	0.831826	0.467074		6.8273	9.57555	15.9546	1.5911	4.15576e-11	0.4005	0.507115
Glyma.01G205900	38.5232	38.4134	24.5627	-0.0375292	0.85081	0.0263703	0.975417		30.9109	29.887	18.2588	0.141981	0.460115	-0.142679	0.797132
Glyma.01G206000	31.9771	30.0345	27.5225	0.484798	2.69246e-09	-0.0688777	0.756743		10.9087	10.3953	7.04422	0.303943	0.105791	-0.167242	0.739932
Glyma.01G206100	10.2273	9.16398	0.172722	-5.13256	4.90481e-11	-0.141932	0.877802		8.83808	8.28395	0.0750349	-5.83817	5.54779e-08	-0.18005	0.825742
Glyma.01G206200	7.53455	6.90584	2.40855	-0.901214	0.00411928	-0.100433	0.917738		11.2021	12.9246	3.17011	-1.13862	0.00026292	0.12729	0.901425
Glyma.01G206400	0.501332	0.528178	1.22315	1.8439	6.94686e-05	0.109043	0.958426		0.160942	0.0972267	0.560736	3.35516	4.46794e-05	-0.81305	0.767158
Glyma.01G206500	1.05614	1.6607	18.0161	4.06545	3.40815e-32	0.670321	0.510847		0.324595	0.509779	4.13469	3.92269	4.91406e-23	0.430936	0.797132
Glyma.01G206600	4.914	2.89084	21.6834	3.53955	9.38417e-18	-0.765413	0.388622		2.28001	1.14282	12.0194	4.24705	2.25513e-31	-1.07027	0.102855
Glyma.01G206700	5.36229	8.63331	9.0426	0.689595	0.158578	0.737856	0.494526		4.27389	4.19265	3.28632	0.529555	0.282053	-0.150628	0.939015
Glyma.01G207000	6.86403	6.23214	4.70741	0.202731	0.480824	-0.126133	0.887228		4.683	4.26909	3.49238	0.579316	0.0575486	-0.245173	0.777952
Glyma.01G207100	1.08144	0.572641	1.60294	2.08479	0.0160125	-0.888401	0.687998		0.0753992	0.0922188	0.613985	3.63523	0.00106053	0.077268	1
Glyma.01G207200	8.95846	8.66846	8.58864	0.597116	0.000503261	-0.0259916	0.975438		11.61	12.3112	8.4755	0.332756	0.153846	-0.00793501	1
Glyma.01G207300	22.5991	33.9175	18.2413	-0.275807	0.193749	0.603974	0.0429883		24.5852	40.288	15.5979	-0.498809	0.023206	0.621388	0.047436
Glyma.01G207400	35.3284	29.8288	10.4603	-0.907561	2.19365e-14	-0.218165	0.256792		12.7715	11.1947	3.21206	-0.925498	1.01912e-07	-0.283411	0.313486
Glyma.01G207500	20.1608	14.4658	5.5537	-0.771842	2.81684e-07	-0.450746	0.0167885		23.6757	23.152	13.853	0.116258	0.468781	-0.126322	0.774195
Glyma.01G207600	0.794244	2.77682	0	-4.84828	0.0030003	1.79809	0.488967		3.10644	9.16292	0	-6.79037	7.6525e-08	1.46502	0.0124091
Glyma.01G207700	133.214	112.397	33.9695	-1.13301	1.72246e-13	-0.221679	0.45902		289.681	232.3	44.1001	-1.53193	2.06051e-10	-0.411508	0.413528
Glyma.01G207800	20.2739	19.6505	10.0766	-0.355459	0.0077005	-0.0190606	0.975002		13.6628	15.9272	5.89207	-0.565027	0.00345825	0.124801	0.826141
Glyma.01G207900	1.59769	1.28402	2.96055	1.82051	0.000741079	-0.253859	0.894722		0.626226	0.633162	1.07374	1.60372	0.0371757	-0.102456	0.985141
Glyma.01G208000	0.479682	0.421845	95.5638	8.42683	6.76577e-43	-0.113705	0.978815		0.254949	0.44399	51.8947	7.72389	4.57201e-51	0.645401	0.805804
Glyma.01G208100	61.5096	50.0596	20.2709	-0.707117	8.0149e-07	-0.271233	0.265175		26.5218	24.2618	11.4239	-0.221567	0.0752829	-0.225847	0.292547
Glyma.01G208200	1.02216	0.357193	7.59072	4.99978	2.10035e-10	-1.47465	0.36336		3.26344	2.49672	23.1842	4.09245	1.51784e-22	-0.49063	0.696607
Glyma.01G208300	28.5624	27.1269	0.9444	-4.22932	1.3087e-98	-0.0531377	0.886141		8.00735	9.23992	0.277333	-4.24174	9.10274e-20	0.11845	0.883507
Glyma.01G208400	42.118	39.0851	27.5719	0.110453	0.368612	-0.0899058	0.778612		43.8444	45.0748	22.6355	-0.138011	0.333907	-0.0585982	0.904418
Glyma.01G208600	157.197	140.452	165.958	0.851379	1.86423e-38	-0.13957	0.21986		37.3362	38.0917	29.3182	0.481614	0.00022996	-0.0662233	0.895491
Glyma.01G208700	25.3303	21.5578	6.99223	-1.00709	4.11157e-10	-0.209838	0.495821		11.9096	12.6842	4.11653	-0.748891	9.97987e-05	-0.00869544	1
Glyma.01G208800	0.467026	0.140217	1.64009	3.89196	0.0144664	-1.38348	0.771932		0.0760383	0.0501576	0.4332	3.77761	0.0269329	-0.732135	0.926366
Glyma.01G208900	4.87055	6.72005	0.37993	-3.52237	1.32823e-06	0.473396	0.66464		1.48706	0.893984	0.0796811	-2.77769	0.0231219	-0.783435	0.61028
Glyma.01G209100	2.1351	3.20598	2.23188	0.0848358	0.896116	0.602604	0.687392		2.90483	3.77896	0.811346	-1.37643	0.00243552	0.262458	0.818215
Glyma.01G209200	54.9364	53.1283	58.497	0.743693	2.2171e-15	-0.0213784	0.954577		13.6256	16.5775	12.3919	0.437292	0.00736511	0.189549	0.651032
Glyma.01G209300	32.5785	29.3413	34.6724	0.848422	1.16538e-16	-0.127339	0.591669		5.8527	6.49562	6.99926	0.962781	1.01506e-07	0.0553493	0.948919
Glyma.01G209400	91.3416	77.6796	16.103	-1.66669	6.34365e-11	-0.215025	0.711666		831.656	709.822	138.532	-1.49192	3.02107e-15	-0.321779	0.401764
Glyma.01G209500	33.8558	24.7327	6.52997	-1.30717	0.00801053	-0.432436	0.725911		42.2321	33.7826	2.50194	-2.84802	3.45962e-25	-0.41685	0.298932
Glyma.01G209600	8.44451	12.0947	1.67276	-2.22834	1.48102e-07	0.527749	0.438661		2.09442	3.55574	0.18614	-3.41939	0.000348436	0.685903	0.523147
Glyma.01G209700	13.3238	13.8781	22.9022	1.33368	7.15959e-06	0.0636027	0.96093		19.452	17.9806	40.5361	2.03378	9.51358e-25	-0.20102	0.741474
Glyma.01G209800	46.3634	36.8438	14.0434	-0.786644	1.02387e-11	-0.311959	0.0580696		20.1172	20.8562	5.7342	-0.999689	6.63511e-10	-0.0414413	0.9495
Glyma.01G210000	0.774039	0.885784	0.552296	-0.0533057	0.984462	0.150996	0.99326		1.29436	1.16263	0	-2.68789	0.122611	-0.209855	0.978304
Glyma.01G210200	4.78006	8.84645	51.0437	3.14312	8.89065e-68	0.91448	0.00269056		8.12044	11.1955	56.9677	3.199	1.56393e-45	0.388723	0.518253
Glyma.01G210400	1.00981	2.87876	0.356639	-2.40487	0.00260842	1.5185	0.172352		1.71128	0.98491	0.380173	-0.442629	0.577214	-0.900898	0.52569
Glyma.01G210600	51.6275	62.4234	16.1327	-1.34118	7.00687e-49	0.294593	0.0148037		23.5434	30.9289	7.08062	-1.25685	2.15557e-16	0.297389	0.259882
Glyma.01G210700	25.8397	26.2066	0.9921	-4.108	5.62227e-15	0.04323	0.971744		24.7172	28.0839	3.89627	-1.96232	2.5643e-14	0.0905515	0.912242
Glyma.01G210800	33.278	34.9686	1.59716	-3.8543	2.90154e-68	0.0865554	0.86363		53.6627	52.115	2.20798	-3.71311	5.32605e-45	-0.138931	0.725174
Glyma.01G211000	2.08357	2.35027	0.0692726	-4.46272	1.91958e-06	0.184791	0.894889		2.19694	2.30499	0.166408	-2.89258	5.99908e-06	-0.0315246	0.994442
Glyma.01G211200	37.3794	36.9838	26.8676	0.156516	0.362583	0.00633861	0.997732		91.9981	85.5256	15.1846	-1.63792	2.15123e-26	-0.200843	0.568433
Glyma.01G211300	1.31452	2.80577	0.941295	-0.945848	0.359315	1.06919	0.642326		1.54951	2.5231	1.00051	-0.477431	0.420328	0.576944	0.66709
Glyma.01G211400	0.998999	0.680265	14.7729	4.94962	3.50199e-15	-0.414353	0.868395		1.25522	0.874103	10.0419	4.34436	5.43392e-12	-0.541167	0.836394
Glyma.01G211500	1.26066	0.926704	0.61996	0.0926017	0.922567	-0.480473	0.847984		0.227249	0.200495	0.650199	2.6653	0.0116096	-0.22615	0.971207
Glyma.01G211600	2.82475	2.51011	2.58681	0.491451	0.836714	-0.00951124	1		0	0	0	NA	NA	NA	NA
Glyma.01G211700	38.3614	40.305	31.7935	0.265026	0.107906	0.097826	0.84422		117.087	111.72	30.689	-1.00273	7.18669e-14	-0.159694	0.635027
Glyma.01G211900	11.2262	11.1521	4.94576	-0.555011	0.0154536	0.00552572	1		4.34569	4.3276	1.99842	-0.26804	0.323989	-0.0835658	0.929875
Glyma.01G212000	11.3178	12.8463	3.82081	-1.12777	2.34771e-05	0.199493	0.763712		3.11295	2.74948	1.3408	-0.14273	0.739054	-0.2887	0.788926
Glyma.01G212100	4.51902	3.38625	2.80225	0.325939	0.583221	-0.409161	0.788393		1.27892	1.02921	0.841641	0.544964	0.428963	-0.381785	0.86341
Glyma.01G212200	6.97911	7.33201	13.8014	1.52505	1.11881e-21	0.0883513	0.872574		2.9668	3.94073	6.16769	1.50442	9.79326e-12	0.321516	0.574782
Glyma.01G212300	6.29738	4.11424	4.92221	0.863362	0.0152161	-0.578121	0.394043		1.94646	1.52319	2.47401	1.53642	0.00746924	-0.418694	0.830872
Glyma.01G212400	6.92297	6.81025	0.309915	-3.84887	7.98501e-12	0.000757667	1		2.64681	2.95876	0.200028	-3.0136	2.15375e-09	0.0651597	0.960565
Glyma.01G212500	7.34027	10.3653	3.25693	-1.06371	0.00117235	0.516361	0.368462		4.67466	6.03557	1.19043	-1.45787	0.00158747	0.267517	0.826117
Glyma.01G212600	9.34062	17.4871	0.0832	-6.96195	2.11995e-08	0.927463	0.0617667		9.18726	13.7275	0.214207	-5.0142	2.45385e-08	0.469555	0.472025
Glyma.01G212700	3.96933	4.36054	2.99306	0.0445946	0.91899	0.169153	0.895805		3.79268	6.05912	6.73563	0.992392	0.00103283	0.616486	0.317718
Glyma.01G212800	19.9322	21.5901	6.82536	-1.04707	1.66251e-07	0.135489	0.799495		8.51318	9.39307	3.08884	-0.729213	0.00109094	0.0466357	0.961681
Glyma.01G212900	5.90144	6.84505	2.67079	-0.728995	0.028654	0.211051	0.818134		5.96509	5.10924	1.05676	-1.37978	0.00409173	-0.321213	0.757179
Glyma.01G213000	3.62407	3.95611	3.12073	0.256355	0.629259	0.170313	0.921719		2.10153	4.01562	2.05548	-0.091691	0.815111	0.873666	0.11527
Glyma.01G213200	56.3491	48.1435	9.13116	-1.79874	2.61545e-48	-0.201704	0.357507		24.1124	23.824	4.44724	-1.56558	4.51307e-29	-0.113951	0.728251
Glyma.01G213300	31.9313	27.3469	11.2779	-0.67859	0.00071811	-0.190313	0.673576		21.0127	25.5228	13.306	-0.0687251	0.767685	0.183601	0.753832
Glyma.01G213400	32.5635	31.4104	6.97444	-1.56026	2.70059e-18	-0.0307023	0.96321		22.3664	26.0321	3.78683	-1.91621	2.30871e-22	0.124209	0.796361
Glyma.01G213500	1.51082	1.64418	1.62973	0.591199	0.292106	0.148799	0.941917		1.16167	1.54012	1.23809	0.559367	0.288724	0.274912	0.885347
Glyma.01G213600	26.575	36.0491	2.09497	-3.48833	7.33324e-59	0.46159	0.0301216		4.52293	5.26384	0.377919	-2.94047	1.02991e-17	0.118078	0.871995
Glyma.01G213700	10.2317	9.48405	114.915	4.2	2.0811e-98	-0.0671022	0.934651		3.40683	3.46845	35.346	4.20612	6.74026e-72	-0.0211907	0.997879
Glyma.01G213800	13.1582	10.8752	2.694	-1.40326	2.59699e-11	-0.245763	0.536439		13.4397	12.1383	1.60434	-2.07455	3.38142e-16	-0.236765	0.591534
Glyma.01G214100	64.2617	57.5699	87.908	1.21439	8.35981e-39	-0.134207	0.518077		25.1236	27.6844	36.2586	1.25361	7.34647e-28	0.0430916	0.93306
Glyma.01G214200	2.59209	2.32848	0.0530921	-4.73623	0.00053434	-0.125468	0.96362		7.0042	9.74361	0.264454	-4.29514	2.99018e-11	0.387389	0.505818
Glyma.01G214300	0.628564	1.21725	33.0038	5.37074	3.79536e-15	0.977516	0.572735		1.02112	1.94241	128.446	6.91706	5.01511e-140	0.892393	0.203563
Glyma.01G214500	12.6415	13.6931	2.9517	-1.60373	3.25602e-15	0.13563	0.786435		10.0719	8.51035	1.65576	-1.50395	4.01096e-08	-0.324499	0.453888
Glyma.01G214600	5.47343	6.30366	20.1197	2.28857	1.76787e-20	0.23602	0.76873		5.00061	5.74132	30.1657	3.25729	9.97157e-40	0.101833	0.932418
Glyma.01G214700	21.7457	20.5708	19.4831	0.529571	4.82361e-05	-0.0537765	0.902472		12.8764	13.6253	8.2649	0.134946	0.428763	-0.0177895	0.988806
Glyma.01G214800	16.8121	13.6266	64.1261	2.84519	9.27075e-112	-0.273317	0.259843		30.0442	26.2763	55.9196	1.94725	6.09094e-37	-0.280526	0.394479
Glyma.01G215000	0	0	0	NA	NA	NA	NA		0.21005	0.260598	1.63467	3.40365	0.000600816	0.325196	0.95689
Glyma.01G215100	9.13751	5.90526	28.7043	2.88783	1.66385e-59	-0.603332	0.028222		3.00654	2.89713	7.48873	2.23804	4.48112e-26	-0.143722	0.865949
Glyma.01G215200	0	0	16.4233	7.06545	7.96507e-08	0	1		0	0	3.47595	5.80476	0.00023751	0	1
Glyma.01G215300	0	0	3.04002	7.30309	2.54936e-08	0	1		0	0	3.05949	6.51738	2.72405e-06	0	1
Glyma.01G215400	119.458	111.458	7.94605	-3.21339	7.038e-45	-0.0731046	0.888825		157.732	166.989	11.929	-2.96328	8.83463e-76	-0.0111856	0.994966
Glyma.01G215500	209.391	172.196	8.43389	-3.75777	4.93004e-112	-0.255874	0.391633		188.75	212.685	33.9292	-1.78532	1.2448e-33	0.0767261	0.891999
Glyma.01G215600	0.759353	0.673764	1.13714	1.35983	0.215608	-0.218707	0.961528		0.346186	0.449522	1.10542	2.2264	0.000927965	0.224659	0.95006
Glyma.01G215700	13.9529	13.0402	1.29043	-2.72544	1.57242e-64	-0.07495	0.842505		2.26156	2.63449	0.306708	-2.19933	2.38966e-10	0.127801	0.88738
Glyma.01G215800	19.7602	18.8284	10.6539	-0.201577	0.180147	-0.0520725	0.914155		19.8555	23.3192	9.16958	-0.476962	0.00316666	0.137846	0.742486
Glyma.01G215900	1.73509	6.25728	0.406772	-3.31939	2.96839e-06	1.855	0.0117117		2.08944	1.30629	0.196573	-2.05209	0.0574	-0.791832	0.64074
Glyma.01G216400	5.95349	7.32951	1.33119	-1.85053	1.78532e-05	0.315703	0.749792		20.2876	19.861	3.9082	-1.45243	1.70486e-07	-0.129925	0.863825
Glyma.01G216500	47.2357	44.4545	18.4212	-0.669038	1.34465e-07	-0.0646898	0.866743		14.9502	14.9601	7.52808	-0.121341	0.617421	-0.0853735	0.919652
Glyma.01G217100	15.2023	12.6214	2.07579	-1.99619	6.57864e-23	-0.246671	0.466833		3.73527	3.33677	0.418602	-2.20324	2.69938e-09	-0.26201	0.685737
Glyma.01G217200	5.72409	8.73881	2.53865	-1.15454	0.00164707	0.633325	0.320393		10.1956	11.0151	1.30646	-2.21763	4.83563e-13	0.013401	1
Glyma.01G217300	18.6839	15.461	24.7524	1.28363	9.88049e-25	-0.24623	0.303999		10.6819	11.9779	16.4683	1.32377	2.79731e-16	0.0712269	0.916625
Glyma.01G217400	26.6202	34.9531	37.46	0.711562	0.000616609	0.428658	0.242471		10.9532	16.5648	7.4282	-0.301499	0.106627	0.499298	0.0536712
Glyma.01G217500	5.9966	6.25546	2.36453	-0.79381	0.00958976	0.0787397	0.93843		3.02756	3.48087	1.47564	-0.412404	0.324976	0.112262	0.945519
Glyma.01G217700	0.41025	0.220096	1.42572	3.32501	0.0171794	-0.888903	0.850311		0.505461	0.799675	6.7952	3.87523	7.24835e-10	0.672873	0.803464
Glyma.01G217900	21.4165	27.5657	51.7198	1.52752	1.11246e-26	0.385452	0.112829		6.7026	7.40687	8.7779	1.10967	2.36671e-09	0.0476393	0.96064
Glyma.01G218000	0.76583	1.04133	0.7752	0.238033	0.776163	0.427599	0.864999		1.94792	2.01933	1.31328	0.288559	0.684057	-0.0928244	0.980691
Glyma.01G218100	16.1771	14.9748	15.0485	0.610536	0.00011192	-0.0856717	0.86649		6.50492	6.3303	3.70176	0.0943751	0.643632	-0.144826	0.790598
Glyma.01G218300	14.9529	16.3598	6.34047	-0.757099	8.13263e-05	0.157427	0.7374		34.7224	36.5026	11.1028	-0.838566	1.33546e-05	-0.0209053	0.987389
Glyma.01G218400	1.89419	2.7767	2.76942	0.597007	0.0945005	0.5728	0.448937		0.521122	0.810453	1.05578	1.20763	0.0239846	0.591272	0.710974
Glyma.01G218500	1.41735	0.983698	41.5449	5.97677	2.43405e-14	-0.47672	0.884911		1.41011	1.57649	50.0823	5.83908	2.86006e-42	0.0588432	0.993393
Glyma.01G218600	2.36175	1.60535	56.5147	5.73701	1.59366e-42	-0.498295	0.645289		0.834027	1.08772	25.6956	5.40661	1.2259e-58	0.254126	0.880484
Glyma.01G218800	12.2411	10.6819	4.15123	-0.744794	0.000149206	-0.177827	0.692734		2.59247	3.10753	1.64843	-0.0538374	0.856095	0.180879	0.824162
Glyma.01G219000	1.97443	2.11006	0.898597	-0.627056	0.160455	0.112597	0.939708		1.10959	1.42474	0.716626	-0.106577	0.841162	0.234753	0.888628
Glyma.01G219200	18.7224	15.8729	0.109747	-6.55243	2.54282e-22	-0.215654	0.567058		5.92445	4.4785	0	-7.83799	1.7386e-10	-0.491205	0.243477
Glyma.01G219400	0.743964	0.985325	0.58376	-0.179875	0.884064	0.495108	0.893927		2.24506	3.04802	3.20104	0.937584	0.0618088	0.389793	0.815167
Glyma.01G219500	14.8518	18.5447	560.307	5.5043	8.81605e-117	0.34906	0.660131		23.3558	29.7025	522.078	5.00176	8.56542e-152	0.243029	0.726822
Glyma.01G219600	66.8149	59.5437	5.93971	-2.72619	9.00521e-85	-0.14149	0.556834		67.9811	72.3223	5.25201	-2.90613	2.08198e-85	-0.00515961	1
Glyma.01G219700	26.1044	22.1158	4.79799	-1.61347	7.55278e-14	-0.209007	0.63255		13.1124	14.3772	2.85948	-1.45754	5.77511e-10	0.049739	0.957585
Glyma.01G219800	50.9037	39.0897	46.5566	0.857505	8.85746e-30	-0.358002	0.000148071		12.1035	11.7355	9.79335	0.596509	4.79513e-08	-0.142455	0.58711
Glyma.01G220000	17.3745	18.0685	6.60857	-0.833602	0.00207268	0.0560227	0.954166		9.99658	9.51468	4.85126	-0.0928785	0.739396	-0.176498	0.812288
Glyma.01G220200	25.652	24.1621	17.7754	0.164022	0.227879	-0.0624611	0.884711		16.0883	19.3622	12.0726	0.180364	0.239849	0.165902	0.651802
Glyma.01G220300	11.4855	13.5174	2.76347	-1.67712	1.00713e-12	0.261883	0.562997		2.17372	2.69584	0.626061	-1.21051	0.00166446	0.216282	0.842837
Glyma.01G220400	18.0332	14.392	9.08894	-0.0574864	0.752873	-0.307276	0.285562		21.3328	21.1633	10.821	-0.105538	0.486702	-0.105728	0.797139
Glyma.01G220500	0	0	0	NA	NA	NA	NA		1.8464	1.98727	0.496362	-1.13126	0.315236	-0.00750363	1
Glyma.01G220600	27.103	32.1318	1.87458	-3.4794	1.66292e-29	0.270573	0.52277		48.1526	56.4399	5.34553	-2.52151	5.50909e-43	0.136967	0.723386
Glyma.01G220700	31.1824	30.4426	0.643161	-4.97016	1.697e-93	-0.00938562	0.992123		13.0303	14.3478	0.143482	-5.75744	2.01406e-30	0.0429489	0.940066
Glyma.01G220800	2.82645	3.61146	1.78505	-0.41029	0.34811	0.372423	0.721437		1.50746	2.98088	0.485437	-1.70756	0.00141225	0.851615	0.303059
Glyma.01G220900	4.44315	7.84921	14.7751	1.51303	1.24794e-13	0.859785	0.00439285		0.883648	1.32008	1.4701	1.02643	0.000876985	0.504515	0.48021
Glyma.01G221100	0.0810687	1.37907	0	-4.96401	0.00370414	4.11024	0.120096		0.110456	0.569829	0	-3.79939	0.0357281	2.32067	0.510057
Glyma.01G221200	1.31529	1.51588	2.81672	1.50769	0.0157846	0.195376	0.934609		2.28515	2.41629	4.97234	1.92344	4.31401e-08	-0.0336355	0.995786
Glyma.01G221300	13.1961	14.525	8.59454	-0.145746	0.701069	0.164639	0.885745		7.80383	7.23309	3.50515	-0.142855	0.720817	-0.21242	0.862167
Glyma.01G221400	1.41246	2.30489	156.445	6.74317	4.30185e-45	0.709824	0.612617		0.936556	1.06955	44.3605	6.2063	6.14375e-84	0.199707	0.907242
Glyma.01G221500	0.224118	0.43733	183.815	9.27549	2.30542e-111	1.00223	0.49213		0.0784044	0.0160575	48.2659	12.2097	4.8915e-24	-2.14261	0.49864
Glyma.01G221700	1.69944	1.65601	0.454955	-1.24691	0.0976188	-0.0289971	0.996178		0.995438	0.90615	0.11964	-2.0161	0.0297033	-0.247423	0.913908
Glyma.01G221800	3.61601	4.67532	3.06363	0.00197432	0.99889	0.396379	0.780333		5.05193	6.51051	2.69223	-0.373277	0.492533	0.221534	0.90218
Glyma.01G221900	0.151319	0.132683	0.579865	2.50456	0.232455	0.111186	0.995667		0.470319	0.689462	1.79263	2.3195	0.00130025	0.290435	0.934537
Glyma.01G222000	5.15852	5.52915	2.66934	-0.435601	0.220123	0.121781	0.913594		5.01639	5.33906	1.48788	-0.972819	0.00283398	-0.0218637	0.997031
Glyma.01G222100	141.717	112.273	17.7379	-2.06852	6.07622e-37	-0.310269	0.204415		477.324	381.673	55.982	-1.90602	2.81437e-35	-0.416113	0.0759977
Glyma.01G222400	44.5069	40.2566	47.3803	0.8504	6.31749e-12	-0.125779	0.689836		76.324	79.9997	81.0247	0.878449	2.51677e-12	-0.0254492	0.9708
Glyma.01G222500	18.9794	17.6415	6.75947	-0.777777	1.03827e-08	-0.0832072	0.828899		10.912	13.9413	3.76246	-1.03129	6.49428e-08	0.250811	0.525956
Glyma.01G222600	1.26139	3.69585	0.19342	-3.69074	0.00392256	1.6157	0.287634		1.15819	1.33326	0.244505	-1.65083	0.100062	0.148391	0.967739
Glyma.01G222700	8.8706	8.84369	2.13971	-1.4445	5.80999e-13	0.0248226	0.978646		3.32292	3.80579	1.21856	-0.771875	0.00635785	0.100292	0.91672
Glyma.01G222800	0	0	0	NA	NA	NA	NA		1.05246	0.816522	0	-3.52615	0.0197952	-0.424708	0.906061
Glyma.01G223000	36.0743	43.8883	0.469574	-5.93242	4.88412e-28	0.307161	0.34129		30.7901	38.789	0.475868	-5.41919	2.22503e-42	0.237536	0.385369
Glyma.01G223100	3.18093	3.82857	3.88916	0.625102	0.0100678	0.287859	0.625222		1.60666	2.16716	1.60473	0.43946	0.164768	0.34693	0.662623
Glyma.01G223200	9.85356	10.6369	9.9011	0.509319	0.00979658	0.1374	0.813839		12.7084	12.0563	5.65625	-0.240675	0.279681	-0.166516	0.781779
Glyma.01G223400	10.0318	10.0515	3.38996	-0.955828	1.0101e-05	0.0306372	0.973002		2.91301	3.82686	1.28414	-0.690332	0.0217641	0.296976	0.667025
Glyma.01G223500	24.4395	20.7508	31.7704	1.22505	2.64933e-25	-0.215911	0.361436		37.1996	29.5085	68.7242	2.07508	2.57742e-57	-0.425529	0.0346759
Glyma.01G223600	4.65408	5.88619	4.56419	0.251003	0.428024	0.361173	0.603382		1.49434	2.25257	1.28837	0.0351584	0.924742	0.5035	0.431732
Glyma.01G223700	12.8231	17.0334	1.27411	-3.12783	7.45153e-30	0.429389	0.157641		7.63748	10.8456	0.403562	-3.91872	2.83092e-23	0.411202	0.232147
Glyma.01G223800	3.51325	2.56784	0.784601	-1.08563	0.215075	-0.437407	0.843423		6.94637	5.81144	0.773155	-2.01051	0.000101402	-0.349223	0.709262
Glyma.01G223900	6.21443	6.51057	3.51229	-0.283987	0.152245	0.0789331	0.898941		2.69168	3.10115	1.26266	-0.413756	0.179924	0.0894926	0.937358
Glyma.01G224000	23.571	26.186	1.0047	-4.097	2.18387e-41	0.173242	0.674257		16.6335	19.7225	0.299823	-5.16957	4.22919e-36	0.151904	0.699507
Glyma.01G224100	1.33169	2.05795	0.166451	-3.00958	0.0296225	0.651204	0.816771		2.06426	2.31899	0	-5.6717	1.35637e-05	0.0933062	0.97398
Glyma.01G224200	20.5033	15.1331	29.1354	1.55085	2.10134e-47	-0.412372	0.00607696		3.16473	2.5591	5.51029	1.95176	3.23504e-22	-0.381376	0.376692
Glyma.01G224300	38.0376	28.7869	16.3248	-0.207266	0.0967174	-0.381651	0.0163825		29.7343	26.121	18.1835	0.334715	0.00553794	-0.277452	0.143547
Glyma.01G224500	2.61658	1.2538	0.286351	-1.50198	0.0108832	-1.03356	0.1563		1.99688	2.01273	0.342536	-1.69023	0.00543933	-0.106102	0.962176
Glyma.01G224600	0.358437	1.62799	2.81969	1.40606	0.133989	2.26801	0.378461		3.23227	3.50963	2.61358	0.439246	0.314134	-0.00849519	1
Glyma.01G224700	13.8197	12.0981	1.6952	-2.24123	2.03848e-14	-0.165706	0.792388		13.1207	13.3166	1.2724	-2.46482	1.00009e-15	-0.0716991	0.933589
Glyma.01G224800	1.06015	0.704474	11.9814	4.67256	5.05221e-13	-0.488672	0.835359		0.658873	0.879465	2.00084	2.08375	1.88939e-05	0.228161	0.917088
Glyma.01G224900	1.17232	1.53803	0	-6.1113	5.03814e-06	0.378992	0.843441		0.588474	1.19969	0	-4.69132	0.000868958	0.918045	0.658903
Glyma.01G225000	1.57441	2.334	34.1216	4.47834	2.30914e-17	0.631098	0.738006		0.934118	1.27276	17.2876	4.56457	5.31986e-21	0.398594	0.85724
Glyma.01G225200	44.5188	38.9466	42.1194	0.722254	1.59686e-12	-0.16578	0.416641		62.3886	71.6291	72.7105	0.880038	1.2799e-16	0.107448	0.731999
Glyma.01G225300	90.2873	102.195	124.998	0.899783	3.24618e-26	0.202746	0.159597		65.6017	74.8235	65.0564	0.662184	9.75969e-10	0.0955919	0.776405
Glyma.01G225400	11.1237	13.8002	23.0468	1.35405	4.36799e-09	0.3251	0.547494		27.4029	22.7647	20.1731	0.687941	0.000945582	-0.380102	0.322542
Glyma.01G225500	0	0.354436	0.903804	1.87216	0.361925	1.90391	0.744471		0.129234	0.0633937	1.03497	4.67832	0.00345717	-0.838198	0.908983
Glyma.01G225600	3.03268	1.75326	4.98612	2.13036	0.130402	-0.851439	0.847565		4.63413	3.79814	2.45851	0.249111	0.768499	-0.344496	0.898542
Glyma.01G225700	48.5074	43.8228	10.9508	-1.38641	1.56363e-21	-0.126603	0.71155		40.8673	45.3225	9.55138	-1.37396	3.31757e-16	0.052176	0.937621
Glyma.01G225800	4.05674	3.8694	7.98099	1.65274	9.53378e-11	-0.035169	0.981418		4.92792	5.36523	4.94878	0.752899	0.00135358	0.0251436	0.991046
Glyma.01G225900	37.7667	31.4694	11.7477	-0.80557	9.53664e-10	-0.246331	0.255327		26.914	30.5324	8.46805	-0.994871	8.96131e-12	0.087862	0.8507
Glyma.01G226000	18.3522	14.1951	30.9536	1.73396	3.30894e-14	-0.347091	0.482947		12.918	11.882	20.2111	1.62827	9.72644e-14	-0.211806	0.750494
Glyma.01G226100	1.48793	3.70875	0.968831	-1.34232	0.10932	1.33729	0.381797		11.0946	13.0551	2.40823	-1.53926	8.1169e-06	0.148335	0.896336
Glyma.01G226200	22.3227	21.4727	0.56833	-4.62542	4.74132e-31	-0.0333696	0.964003		9.59251	9.78871	1.06658	-2.35956	2.10117e-18	-0.0619954	0.938044
Glyma.01G226500	2.30432	1.92501	0.370097	-1.75263	0.000141696	-0.244464	0.830581		0.603278	1.19672	0.140491	-2.11535	0.0316111	0.904691	0.598702
Glyma.01G226600	9.07194	11.0213	6.17068	-0.233352	0.414961	0.315147	0.606018		4.65212	5.50613	4.36442	0.530352	0.0777291	0.14934	0.893745
Glyma.01G226700	30.2931	23.0695	31.8277	1.07232	6.15373e-33	-0.367798	0.0021852		29.7451	29.1035	54.4174	1.76123	7.06738e-44	-0.129792	0.737016
Glyma.01G226800	22.1033	20.1795	7.30156	-0.865128	2.19422e-08	-0.103846	0.800565		34.1045	32.9899	10.7209	-0.750954	8.34669e-07	-0.143257	0.697303
Glyma.01G226900	25.8382	21.4697	10.3707	-0.434769	0.00896286	-0.2474	0.424191		13.9998	14.6864	14.579	0.850633	2.75266e-06	-0.019747	0.991079
Glyma.01G227000	24.1479	19.4103	18.9491	0.574571	3.66711e-07	-0.292158	0.0947722		27.7381	29.062	22.7575	0.504254	9.52979e-05	-0.0259248	0.969748
Glyma.01G227100	34.9103	32.9641	8.55681	-1.34124	3.64264e-23	-0.0585128	0.887321		10.9549	14.0089	1.43869	-2.41386	1.57686e-26	0.26827	0.422205
Glyma.01G227200	79.3171	86.8603	5.69155	-3.32987	6.31264e-137	0.156672	0.47515		34.2281	38.4792	2.73332	-2.9454	2.33389e-76	0.0739413	0.836394
Glyma.01G227300	49.2654	41.919	14.5552	-0.922605	4.43719e-11	-0.207605	0.404577		155.661	144.539	41.3086	-0.93862	1.06708e-12	-0.203095	0.457966
Glyma.01G227400	30.5041	24.6596	18.2833	0.172276	0.326316	-0.277461	0.374586		40.2586	35.8342	25.6152	0.374811	0.00863468	-0.264299	0.311402
Glyma.01G227500	3.88732	3.90267	1.30566	-0.97281	0.00213654	0.0343386	0.982405		0.897118	1.50244	0.526209	-0.675603	0.141696	0.645649	0.458016
Glyma.01G227600	6.26371	6.75586	0.920494	-2.28885	0.0104946	0.119099	0.96845		2.20425	3.06126	0.424385	-1.81289	0.0479303	0.393246	0.871257
Glyma.01G227700	18.0106	14.277	2.5754	-1.88638	5.2603e-12	-0.306735	0.518992		22.5449	19.7996	3.59915	-1.57212	1.85192e-14	-0.284276	0.368739
Glyma.01G227900	1.21274	1.9344	0	-5.82869	2.98273e-05	0.700681	0.714284		0.891367	2.46129	0	-5.97871	3.69465e-06	1.3935	0.0931561
Glyma.01G228000	7.78549	5.80948	0.712979	-2.4409	8.18074e-12	-0.392104	0.441145		1.29954	1.0388	0.0801853	-2.93328	0.000119756	-0.399993	0.723123
Glyma.01G228100	10.7778	10.6533	12.3564	0.829484	2.11804e-08	-0.00480821	0.999913		6.47402	6.28007	5.8245	0.749268	0.00203879	-0.135384	0.881315
Glyma.01G228200	19.7663	18.9053	6.87378	-0.852726	2.08657e-10	-0.0370122	0.933639		4.22845	4.78933	1.71435	-0.603676	0.00941886	0.0839314	0.915706
Glyma.01G228300	20.1416	19.3448	9.8393	-0.381687	0.102861	-0.0359309	0.970979		12.7452	13.8931	5.49585	-0.464689	0.0574141	0.0368495	0.976844
Glyma.01G228400	14.2938	13.6901	11.4263	0.350278	0.0841409	-0.0378791	0.96362		35.8143	35.2469	24.17	0.319201	0.0475653	-0.115161	0.81398
Glyma.01G228500	20.7556	19.3933	27.3768	1.10437	3.57783e-20	-0.0756004	0.848335		11.1311	13.4239	11.8606	0.673647	1.35594e-05	0.17108	0.684914
Glyma.01G228700	1.46801	2.70985	0.817539	-1.14573	0.116393	0.897104	0.539986		2.3118	4.00113	1.53498	-0.533591	0.315281	0.71274	0.515032
Glyma.01G228800	17.9778	21.3745	8.34373	-0.757419	2.55983e-05	0.269594	0.426823		3.20757	4.10131	1.75156	-0.378919	0.158402	0.266822	0.666317
Glyma.01G228900	25.5567	20.3949	14.612	0.125719	0.231453	-0.306287	0.028547		13.1878	12.5783	4.07485	-0.770592	2.553e-07	-0.163712	0.624117
Glyma.01G229000	9.75709	11.0148	22.6493	1.66289	1.2554e-17	0.183523	0.749792		9.63599	11.4108	12.8262	1.03455	5.19889e-05	0.158952	0.869
Glyma.01G229100	8.39855	5.90569	56.6237	3.85656	2.34732e-36	-0.465875	0.513841		2.51595	2.38776	12.2036	3.2314	1.51099e-27	-0.167086	0.900431
Glyma.01G229200	23.8895	16.5437	235.539	4.44388	2.62296e-220	-0.507612	0.010743		6.68997	6.82763	57.9252	3.93733	4.61835e-104	-0.0616193	0.947079
Glyma.01G229300	12.3094	8.31253	2.00294	-1.45349	0.000440774	-0.518879	0.458696		4.33783	6.18077	1.23271	-1.39495	0.00814895	0.41717	0.716926
Glyma.01G229400	59.1201	56.185	53.9551	0.551488	3.74952e-09	-0.0512346	0.865972		38.4824	40.9302	26.0759	0.208717	0.195343	-0.00423859	1
Glyma.01G229500	24.0284	26.5554	31.6643	0.856933	2.7625e-12	0.174005	0.528141		7.26279	8.3402	7.05868	0.623786	0.00163002	0.110255	0.882081
Glyma.01G229600	547.652	431.598	5.22079	-5.76838	0	-0.320329	0.00248066		36.8132	38.0224	0.252177	-6.28099	7.59518e-40	-0.0498091	0.916256
Glyma.01G229700	108.2	98.4292	40.7793	-0.664222	2.02095e-14	-0.114502	0.520521		34.3189	35.7424	11.3247	-0.796917	7.12355e-11	-0.0359801	0.943714
Glyma.01G229800	10.2047	7.90541	33.6285	2.70094	1.77657e-32	-0.334224	0.53915		32.8641	34.3068	322.585	4.09231	7.75724e-268	-0.0301164	0.964556
Glyma.01G229900	9.07447	7.83174	0.667132	-2.93352	6.5517e-16	-0.202708	0.769062		5.69428	6.13754	0.227705	-3.89288	2.91739e-13	0.00641394	1
Glyma.01G230200	45.5905	32.3808	79.7739	1.91048	9.98791e-28	-0.464359	0.0930378		103.392	121.436	93.2919	0.476905	0.00091965	0.13863	0.7384
Glyma.01G230300	7.02948	7.74288	12.3748	1.29199	3.42963e-07	0.166134	0.847195		12.9562	12.703	15.3556	1.12826	5.44721e-09	-0.122642	0.864871
Glyma.01G230400	8.69267	7.68992	8.60536	0.773515	0.00359861	-0.137153	0.875837		3.57663	3.88526	4.34509	1.03902	0.000879453	0.0208838	1
Glyma.01G230500	5.11617	5.932	1.63388	-1.26104	0.00291895	0.227049	0.843195		0.493208	0.67367	0.0312926	-3.67401	0.00771094	0.328838	0.901668
Glyma.01G230600	13.9505	8.70568	10.7071	0.893921	9.53606e-05	-0.655037	0.0505706		2.54626	2.9631	2.3705	0.549697	0.0743217	0.113129	0.924551
Glyma.01G230700	72.4429	65.0327	45.623	0.0963686	0.36083	-0.135365	0.52008		41.2735	38.2684	13.5694	-0.633562	9.52621e-09	-0.203206	0.276648
Glyma.01G230900	3.30159	3.32077	8.39155	1.9507	1.3811e-10	0.0150914	0.996269		15.925	10.8186	10.8835	0.86505	0.000251334	-0.66158	0.0515656
Glyma.01G231300	1.54933	2.3031	45.3516	4.88156	2.03327e-50	0.614761	0.551329		0.432747	0.381575	6.54664	4.97875	4.30309e-09	-0.270044	0.960565
Glyma.01G231400	38.3061	29.1409	43.7619	1.18917	3.52744e-24	-0.369653	0.0343529		36.1674	35.9668	24.9386	0.332584	0.0697559	-0.102287	0.877689
Glyma.01G231500	37.5559	42.7631	73.8772	1.40217	1.58842e-20	0.205704	0.564453		1.44565	1.05504	2.16674	1.87201	4.53299e-06	-0.53816	0.610052
Glyma.01G231600	9.08046	8.71355	6.5106	0.195934	0.263126	-0.0450559	0.941662		5.57359	6.36442	6.22042	0.831479	5.04299e-06	0.0966225	0.891221
Glyma.01G231700	30.0969	27.4138	90.7872	2.3469	9.10697e-96	-0.117907	0.695007		9.7505	10.5002	23.3333	2.00302	2.36484e-28	0.0117887	1
Glyma.01G231800	0.694982	0.891718	0.37437	-0.607076	0.57999	0.382114	0.908596		2.53487	1.75165	1.27923	0.445227	0.427909	-0.659747	0.559113
Glyma.01G231900	29.7977	27.2848	72.9595	2.03254	5.81127e-46	-0.109999	0.80811		42.3218	38.3657	346.166	4.03055	5.29901e-249	-0.234773	0.378985
Glyma.01G232100	22.1039	20.8871	15.3193	0.151799	0.478234	-0.0511219	0.945186		24.0788	23.3831	20.1189	0.645333	7.2366e-05	-0.13789	0.783274
Glyma.01G232300	10.3693	11.9176	19.526	1.3172	5.34159e-11	0.228302	0.664758		15.5088	17.6782	14.946	0.614087	0.00395221	0.0855896	0.917828
Glyma.01G232400	8.40392	7.43506	6.30304	0.373795	0.111044	-0.157488	0.813663		16.0975	13.4994	8.99053	0.270292	0.145817	-0.357154	0.233135
Glyma.01G232500	25.3556	30.379	7.28426	-1.45056	5.91302e-26	0.285648	0.160334		7.56214	9.15666	2.20985	-1.20551	2.2528e-09	0.185008	0.703218
Glyma.01G232600	36.4619	35.8208	47.427	1.01376	2.45369e-16	-0.000421473	1		57.4254	53.6959	41.8187	0.502454	2.4963e-05	-0.192581	0.441617
Glyma.01G233000	45.0706	47.3917	64.383	1.04948	3.81123e-24	0.0916928	0.756381		13.4894	16.3642	18.7446	1.05388	6.37766e-11	0.18276	0.688973
Glyma.01G233100	6.00716	4.12711	2.16905	-0.321251	0.403239	-0.517632	0.446854		1.16144	1.14995	0.547842	-0.224881	0.686642	-0.0957004	0.96637
Glyma.01G233200	7.25084	7.32278	5.25946	0.125712	0.617675	0.0498465	0.957471		4.64685	5.52666	3.54447	0.217882	0.36375	0.152876	0.83603
Glyma.01G233300	31.8908	21.9424	45.9078	1.67431	6.14832e-93	-0.5192	1.20526e-07		14.6636	11.0548	22.0499	1.85475	3.96315e-48	-0.50341	0.00451566
Glyma.01G233500	22.1038	24.468	14.2992	-0.160592	0.375769	0.159425	0.710665		17.1998	21.5716	14.87	0.317745	0.0544236	0.242607	0.484344
Glyma.01G233600	53.3167	58.4978	25.4661	-0.598973	1.18527e-06	0.158269	0.546037		56.38	64.5213	12.7596	-1.47501	3.04952e-45	0.0987917	0.719515
Glyma.01G233700	13.9826	12.5863	20.531	1.32621	1.92599e-14	-0.144081	0.777812		7.78887	11.1021	11.1037	0.871202	6.82457e-06	0.407811	0.277983
Glyma.01G233800	20.2179	27.5308	10.4237	-0.808707	0.137781	0.484823	0.701867		4.90067	6.54955	4.09646	0.197109	0.758231	0.281277	0.89412
Glyma.01G233900	39.8805	34.1338	19.3575	-0.226855	0.284468	-0.202912	0.671443		1.49383	1.9444	0.996819	-0.0879921	0.84468	0.247883	0.849035
Glyma.01G234000	2.17958	2.83047	8.81175	2.23544	3.7595e-12	0.390166	0.678172		0.986749	1.70951	4.58706	2.26386	1.96956e-10	0.728689	0.433637
Glyma.01G234100	9.50841	11.0659	3.48644	-1.06565	5.89785e-05	0.237152	0.701867		2.31927	2.76749	1.0623	-0.510475	0.113724	0.151881	0.881767
Glyma.01G234200	21.0065	18.3835	18.1833	0.594179	0.0101618	-0.174759	0.786793		82.7024	79.9236	71.4489	0.698049	2.63906e-09	-0.144221	0.62659
Glyma.01G234300	78.021	71.9339	96.7003	1.03719	8.56757e-36	-0.093389	0.645289		14.5496	17.5085	19.8627	1.04193	2.25186e-16	0.177039	0.572514
Glyma.01G234400	27.309	32.0428	19.5963	-0.0977397	0.62123	0.24956	0.519619		32.5541	28.7645	3.36314	-2.19106	1.68902e-16	-0.272929	0.645506
Glyma.01G234500	40.8006	34.3176	46.2494	1.04017	1.74573e-11	-0.231181	0.490976		26.6112	24.0604	20.059	0.597207	9.89691e-06	-0.242722	0.349126
Glyma.01G234600	28.8341	38.8267	123	2.27471	4.17878e-96	0.45576	0.00232253		7.98331	9.60148	23.4991	2.14641	6.72976e-44	0.180685	0.694697
Glyma.01G234700	28.806	23.6997	35.1442	1.17489	1.01099e-21	-0.251083	0.265504		32.4358	31.0454	19.4613	0.181589	0.172112	-0.151989	0.621035
Glyma.01G234800	0.681914	0.914801	0.434661	-0.499628	0.660352	0.432513	0.899271		1.68824	1.49439	1.67601	1.03557	0.148509	-0.280969	0.918357
Glyma.01G234900	2.89705	5.66281	0	-6.2135	2.78579e-06	1.00218	0.4041		2.83892	3.54233	0.116419	-3.84496	0.00095226	0.204	0.918769
Glyma.01G235200	33.3529	29.5058	12.6202	-0.619195	4.86786e-08	-0.154753	0.488091		18.2226	19.1796	5.11026	-1.04595	7.64109e-13	-0.01903	0.982236
Glyma.01G235300	28.5025	25.309	4.30609	-1.94184	8.30301e-28	-0.153513	0.681734		6.64135	8.7485	1.36549	-1.78251	8.86092e-12	0.305932	0.511003
Glyma.01G235400	2.55817	3.52014	0.168146	-3.75653	1.45962e-05	0.498892	0.682486		0.39062	0.0832403	0	-0.0424727	0.991395	-2.12892	0.74914
Glyma.01G235500	5.41213	2.48014	0	-4.94889	0.000322438	-1.1187	0.381529		0.399189	0.49686	0	-3.11114	0.0682737	0.30264	0.962626
Glyma.01G235600	19.3409	16.2934	9.27836	-0.214893	0.433671	-0.207324	0.756902		43.5473	34.5996	16.3759	-0.222071	0.11924	-0.423849	0.0151826
Glyma.01G235700	8.33371	8.3413	3.15386	-0.795624	0.000395988	0.0247337	0.982845		5.54067	6.47252	3.35541	-0.0963711	0.713398	0.116369	0.890174
Glyma.01G235800	12.0198	11.1774	0.348386	-4.44163	1.44611e-09	-0.084344	0.948197		6.78174	5.64516	0.350542	-3.10948	3.80515e-08	-0.378554	0.670463
Glyma.01G235900	8.12663	10.7388	2.42495	-1.56051	4.56849e-05	0.436932	0.55163		15.0323	18.1187	4.75915	-1.0526	1.09876e-05	0.179326	0.76868
Glyma.01G236100	20.3069	21.3324	12.4869	-0.170606	0.284225	0.0983152	0.825593		20.7044	20.9263	7.82408	-0.549692	0.00087299	-0.0834558	0.881331
Glyma.01G236300	45.4864	38.1137	0.44567	-5.83255	4.67325e-64	-0.227918	0.302938		34.1739	33.1056	0.795161	-4.48784	8.13283e-69	-0.140088	0.65485
Glyma.01G236400	24.0968	22.8265	8.87229	-0.743922	1.70704e-08	-0.057936	0.890544		6.74453	7.11332	3.69368	-0.0823367	0.644013	-0.0164602	0.99144
Glyma.01G236500	2.38577	3.85593	2.63016	0.0821542	0.937379	0.676629	0.802557		1.54528	1.45015	1.72918	1.14309	0.0707451	-0.219151	0.933706
Glyma.01G236600	81.9163	67.4701	9.57816	-2.2113	3.01704e-39	-0.257598	0.33727		161.592	135.523	13.9663	-2.41168	1.48032e-52	-0.348637	0.15002
Glyma.01G236800	17.3846	18.7463	66.6033	2.43696	8.77898e-69	0.125349	0.778654		5.82616	9.69218	16.2257	1.60637	1.20135e-16	0.620912	0.0508544
Glyma.01G236900	4.91426	9.63331	13.427	1.09746	0.00551637	0.959258	0.213602		0.863184	2.43963	2.07636	0.665541	0.304548	1.3398	0.304127
Glyma.01G237100	4.9791	5.21429	2.82453	-0.280697	0.595202	0.102196	0.957662		1.01984	1.08048	0.365597	-0.731452	0.29838	0.00701334	1
Glyma.01G237200	37.9496	37.3322	16.2755	-0.595804	1.18783e-05	0.00121422	1		24.576	28.995	9.71162	-0.707441	3.97418e-06	0.14431	0.70475
Glyma.01G237300	0.642459	2.2841	1.47185	-0.00421834	0.998719	1.85106	0.446429		2.5245	4.08776	2.63412	0.243938	0.627415	0.558267	0.627862
Glyma.01G237400	7.77961	9.43134	7.39021	0.245196	0.355494	0.308088	0.597732		2.36864	3.30882	1.95488	0.0676446	0.862881	0.386458	0.651975
Glyma.01G237500	0.436865	0.688791	0	-5.62914	4.7139e-05	0.642236	0.738195		0.732413	1.52687	0.0448107	-4.34091	0.0012493	0.937462	0.510057
Glyma.01G237800	14.4721	18.0776	33.8623	1.50604	6.01952e-18	0.349977	0.324385		10.9424	9.04466	18.5028	1.90007	1.16173e-46	-0.376801	0.0914171
Glyma.01G237900	13.2827	15.4176	16.3367	0.720506	0.0109222	0.228832	0.773425		7.76367	10.2028	7.58472	0.44048	0.109084	0.283727	0.694699
Glyma.01G238000	43.8277	40.2866	56.1814	1.07528	1.0402e-06	-0.0857482	0.913166		71.9058	71.8962	139.644	1.81848	2.70961e-52	-0.0955285	0.82134
Glyma.01G238100	0.892132	0.685133	1.96875	2.15648	0.0120011	-0.39238	0.898941		0.154892	0.272214	0.387611	1.31129	0.262127	0.817185	0.851843
Glyma.01G238200	45.673	50.0602	37.7576	0.199065	0.0419591	0.156117	0.400789		13.3038	16.0258	13.9434	0.660688	6.88243e-11	0.171162	0.428455
Glyma.01G238300	39.3057	36.9308	26.1471	0.110801	0.314025	-0.0644635	0.840247		9.99952	12.1142	7.07316	0.0821296	0.597537	0.176562	0.607537
Glyma.01G238400	19.941	18.852	16.4107	0.404533	0.0040079	-0.0593597	0.898941		30.1414	35.0912	15.649	-0.305903	0.0516522	0.124626	0.767258
Glyma.01G238600	4.73671	3.99647	1.38767	-0.931319	0.0423106	-0.227625	0.857003		4.18981	3.74235	3.20557	0.650994	0.0210699	-0.256141	0.741474
Glyma.01G238700	18.4377	14.7412	12.3361	0.351926	0.0101959	-0.296394	0.178477		15.1775	13.9985	6.75375	-0.18958	0.320446	-0.211534	0.593286
Glyma.01G238800	1.68848	1.92093	20.9478	4.09137	1.60251e-49	0.208274	0.842212		1.75427	2.57465	14.2247	3.32031	5.22974e-37	0.459722	0.532523
Glyma.01G238900	2.13908	2.29013	0.200265	-2.86339	0.0108231	0.110142	0.976462		5.99019	10.0037	2.46795	-1.17535	0.00195874	0.63209	0.300373
Glyma.01G239000	30.7149	23.9752	23.171	0.561692	3.53295e-07	-0.331144	0.0375683		8.8564	11.6557	7.61454	0.23508	0.206355	0.302678	0.399592
Glyma.01G239200	30.9575	24.2011	23.8449	0.588259	1.13291e-07	-0.332386	0.0387222		13.8085	16.0947	15.9019	0.8432	2.93404e-10	0.127623	0.750516
Glyma.01G239500	4.10446	4.1181	0.427715	-2.61802	0.0017207	0.0537304	0.990596		3.49419	3.04278	0.486895	-1.72691	0.000949616	-0.29689	0.781884
Glyma.01G239600	13.8002	12.5344	2.91737	-1.49158	7.56993e-06	-0.115844	0.900358		40.0598	38.0094	5.52664	-1.92676	8.74629e-28	-0.169349	0.649871
Glyma.01G239700	16.6847	14.7709	19.7198	1.02064	1.00421e-14	-0.153102	0.638551		8.84743	9.44311	10.2187	0.973619	2.54577e-08	-0.0164137	0.994966
Glyma.01G239800	6.31566	4.55477	0.622705	-2.22862	0.00544516	-0.46517	0.754445		5.86356	5.34504	0.295525	-3.38198	4.11697e-06	-0.22436	0.854623
Glyma.01G239900	18.3331	21.4752	3.26708	-2.1332	2.49699e-10	0.249257	0.746693		35.3735	33.7373	3.31707	-2.50941	4.48495e-24	-0.166976	0.7384
Glyma.01G240000	62.2979	63.2228	11.1671	-1.90064	3.36241e-26	0.0396287	0.945759		256.528	237.113	38.7516	-1.74706	2.49686e-12	-0.206577	0.790235
Glyma.01G240100	65.6126	57.9742	0.96926	-5.2913	3.11681e-144	-0.151798	0.467911		45.8339	45.2703	0.321305	-6.18711	1.40647e-74	-0.112217	0.669495
Glyma.01G240500	0.763348	1.11603	20.3899	4.82936	3.01102e-43	0.545565	0.629439		0.518127	0.392939	7.94746	5.26998	8.89958e-27	-0.590575	0.737337
Glyma.01G240700	18.9268	18.6411	3.74807	-1.71416	3.30068e-15	0.00297539	1		9.18066	8.71086	1.78048	-1.40608	1.20167e-06	-0.173379	0.799248
Glyma.01G241000	40.6157	38.4872	44.0953	0.804844	2.35046e-09	-0.0500251	0.91666		22.6073	29.8156	25.5459	0.636853	1.92116e-06	0.301896	0.205127
Glyma.01G241100	55.6839	56.4327	14.4622	-1.3713	4.15292e-09	0.0399487	0.965456		8.61443	11.5734	3.2818	-0.948232	0.00141617	0.320196	0.619072
Glyma.01G241200	19.356	38.672	20.7697	-0.273822	0.308971	1.00729	0.00305317		42.8683	71.8407	29.5025	-0.429861	0.0915569	0.649732	0.0960617
Glyma.01G241300	39.4589	38.1252	31.9399	0.348435	6.86939e-06	-0.0254346	0.925101		7.89709	10.0129	6.15843	0.154177	0.24557	0.245307	0.295174
Glyma.01G241400	8.57377	8.54391	2.67034	-1.05662	0.00129545	0.0125202	0.996789		2.68015	3.36835	1.06884	-0.780833	0.145401	0.225736	0.89461
Glyma.01G241500	15.5524	16.3992	3.63885	-1.57397	9.49637e-11	0.113225	0.87244		5.60112	7.70254	2.44365	-0.773872	0.0070754	0.363749	0.533364
Glyma.01G241600	57.7298	62.088	18.8223	-1.11507	1.08662e-05	0.124751	0.862924		44.0123	39.3013	14.9449	-0.528231	0.0121803	-0.259012	0.538637
Glyma.01G241700	3.96924	8.84301	2.23806	-1.38209	0.0617165	1.16554	0.377167		2.90425	4.24611	1.72712	-0.392893	0.536316	0.436835	0.798888
Glyma.01G242000	48.4933	42.0461	57.6674	1.06355	1.01836e-14	-0.183898	0.555449		65.8792	74.1116	86.8186	1.08981	1.53821e-25	0.0759758	0.839197
Glyma.01G242100	0.944874	1.47687	0.0742507	-3.58828	0.0221188	0.649354	0.843223		0.616661	2.13957	0.280277	-2.17119	0.0173611	1.64769	0.194882
Glyma.01G242200	13.7106	12.5694	14.8	0.849629	0.0172898	-0.0851271	0.949939		119.689	91.2436	74.8018	0.573501	6.17012e-07	-0.487091	0.000509038
Glyma.01G242300	17.2908	16.3334	19.741	0.879234	4.67572e-14	-0.0554119	0.891678		10.24	12.0936	8.69648	0.397389	0.0474358	0.150717	0.810855
Glyma.01G242500	8.79515	11.2491	7.31886	-0.00870386	0.972833	0.376875	0.335007		9.21064	10.1414	4.16086	-0.444175	0.055042	0.0435257	0.966216
Glyma.01G242800	57.0186	40.949	15.8023	-0.772704	1.04153e-09	-0.452131	0.00298762		51.7134	46.6454	29.452	0.195467	0.0896783	-0.244915	0.193067
Glyma.01G242900	21.4218	19.042	11.1687	-0.174534	0.565395	-0.135558	0.880569		175.745	139.559	38.3943	-0.988377	1.04986e-05	-0.429116	0.265529
Glyma.01G243000	28.9534	31.7232	15.4763	-0.424799	0.124519	0.146596	0.856264		24.3017	27.0609	11.1749	-0.423803	0.0299154	0.0725987	0.914932
Glyma.01G243100	12.6476	12.0943	7.37189	-0.115746	0.703734	-0.0323816	0.982671		7.39095	6.62799	3.85103	0.0718453	0.777763	-0.256578	0.618135
Glyma.01G243200	0.664198	0.721714	0	-4.20185	0.0131562	0.135836	0.985355		0.851931	1.31308	0	-4.86797	0.000442162	0.515531	0.833782
Glyma.01G243300	24.7697	21.6216	10.0405	-0.501804	0.0455434	-0.161328	0.809617		153.548	131.773	64.366	-0.168253	0.46344	-0.315955	0.511325
Glyma.01G243400	10.6263	13.0076	0.261498	-5.06037	2.03298e-10	0.330432	0.680016		607.175	728.74	17.2954	-4.55034	1.53472e-117	0.172347	0.751756
Glyma.01G243600	17.5714	17.1171	10.8198	-0.0662435	0.711377	-0.0119246	0.992908		9.03829	9.26912	3.61222	-0.493905	0.0123841	-0.0531808	0.947079
Glyma.01G243800	8.25901	7.28232	1.27457	-1.92134	0.00977188	-0.179152	0.931321		15.1683	16.3284	1.78595	-2.36439	4.3167e-09	-0.00174125	1
Glyma.01G243900	25.4918	21.2261	15.8994	0.188692	0.0815224	-0.241513	0.149454		6.62493	7.31879	3.72271	-0.125402	0.481415	0.047814	0.945519
Glyma.01G244100	2.09577	0.773676	0	-2.43597	0.255667	-1.43771	0.754264		0	0.0908789	0	-0.0424724	0.994061	1.00602	0.962626
Glyma.01G244200	1.9078	1.38611	50.4604	5.80037	1.01922e-45	-0.446172	0.737106		0.782222	0.935303	18.9864	5.17725	1.28071e-36	0.268428	0.900946
Glyma.01G244300	17.7742	15.1578	8.10518	-0.301424	0.169322	-0.213645	0.660725		7.73208	8.74931	4.99664	0.0524801	0.838892	0.0815272	0.924413
Glyma.01G244400	27.5396	22.9396	6.76848	-1.15345	8.65982e-26	-0.237644	0.138746		6.19856	6.31481	1.34567	-1.35685	2.98058e-09	-0.0605458	0.943712
Glyma.01G244500	10.9804	18.5403	10.1013	-0.25643	0.322265	0.782575	0.0293242		33.601	49.3817	10.8367	-1.3408	1.6655e-15	0.45949	0.0427671
Glyma.01G244600	1.31783	0.780748	3.89542	2.93462	4.55577e-05	-0.702983	0.735382		1.04149	1.23986	9.62159	3.82611	3.10915e-25	0.143725	0.943476
Glyma.01G244700	13.9901	13.5956	0.770933	-3.53797	2.0524e-110	-0.0194902	0.96561		10.2201	9.89246	0.369651	-3.97165	3.08849e-23	-0.13992	0.808098
Glyma.01G244800	6.53058	5.69691	0	-6.80628	8.17748e-08	-0.169857	0.903581		1.27627	1.8308	0	-5.4129	3.47179e-05	0.423092	0.806197
Glyma.01G244900	44.4648	32.8994	49.1839	1.18803	6.87614e-41	-0.408911	0.000325539		45.0833	36.835	121.683	2.58561	5.50244e-91	-0.386031	0.057642
Glyma.01G245100	38.8317	35.5728	16.6791	-0.488734	0.00169462	-0.104921	0.81232		24.4831	23.6671	6.13256	-1.09345	1.24565e-14	-0.14341	0.644601
Glyma.01G245200	30.4241	29.373	24.2888	0.336321	9.44632e-05	-0.0309057	0.917039		11.7182	12.3257	7.49439	0.141451	0.295249	-0.0193958	0.979207
Glyma.01G245300	3.64217	3.64494	0.412043	-2.56123	0.00050047	0.0131228	1		0.999716	0.693245	0.0316911	-3.52221	0.0126091	-0.568108	0.803531
Glyma.01G245400	31.3584	32.3522	21.096	-0.00868537	0.958818	0.0620448	0.894889		15.8813	16.5577	10.1602	0.150048	0.346358	-0.0324633	0.964976
Glyma.01G245500	31.2348	26.4389	9.21086	-0.916535	1.7451e-09	-0.216596	0.429861		36.1177	41.3158	20.8797	-0.123037	0.51728	0.101338	0.874693
Glyma.01G245600	39.3353	48.763	48.2934	0.590511	0.000313871	0.330947	0.267152		100.123	110.442	76.8917	0.338535	0.00882053	0.0485548	0.923107
Glyma.01G245700	47.3945	61.9984	67.3638	0.731694	5.70259e-19	0.407931	8.2488e-05		19.5337	20.1493	12.9206	0.20963	0.219418	-0.0425015	0.955339
Glyma.02G000100	22.5924	21.1931	14.8738	0.088451	0.48639	-0.069421	0.849805		3.70514	3.77319	1.71578	-0.280683	0.174953	-0.0816263	0.907108
Glyma.02G000200	68.6421	72.3462	104.856	1.15313	4.01733e-24	0.0935227	0.778156		68.3498	73.9031	125.502	1.6225	2.529e-76	0.0201195	0.96637
Glyma.02G000300	0.49257	0.769638	36.2273	6.15993	6.9445e-22	0.693926	0.807354		0.41636	0.517587	11.98	5.33158	1.23757e-17	0.0716303	0.996631
Glyma.02G000400	12.674	12.8429	16.3236	0.962173	2.68386e-06	0.0546041	0.944946		6.44246	9.04165	11.4996	1.20322	3.60903e-10	0.41012	0.277987
Glyma.02G000500	11.0265	8.89991	5.48154	-0.0936352	0.803165	-0.285962	0.738341		15.3461	19.108	12.7332	0.283822	0.300637	0.227824	0.770455
Glyma.02G000600	48.8039	40.0636	2.17966	-3.6012	1.10035e-86	-0.263457	0.204109		60.024	54.8128	2.62575	-3.46949	7.99531e-75	-0.22617	0.389786
Glyma.02G000700	7.88572	6.45529	0.833982	-2.32916	1.0608e-09	-0.264959	0.732263		9.77234	10.4447	2.42169	-1.2217	5.5696e-07	0.00847885	1
Glyma.02G000900	25.9918	27.687	42.2845	1.21988	7.19304e-19	0.109054	0.793822		126.932	104.131	216.87	1.9231	1.21476e-20	-0.380642	0.37396
Glyma.02G001000	28.119	31.611	11.1493	-0.900182	3.44365e-10	0.190963	0.52815		9.75527	9.61905	10.0489	0.916712	5.54265e-06	-0.111157	0.886138
Glyma.02G001100	50.3163	41.2551	10.1803	-1.42854	7.65253e-10	-0.26164	0.582917		46.5911	46.9706	14.8135	-0.800331	6.32793e-07	-0.0828247	0.886121
Glyma.02G001200	15.8425	12.2322	4.30321	-0.89689	2.81599e-09	-0.353951	0.093235		11.1464	10.9896	3.29586	-0.871901	1.67301e-05	-0.10452	0.866082
Glyma.02G001300	18.6553	14.0607	33.1191	1.84592	6.6788e-18	-0.402091	0.345116		39.4309	23.7782	43.1299	1.7162	1.4443e-14	-0.819901	0.00831699
Glyma.02G001400	1.23916	0.804332	8.07801	3.91487	5.18783e-27	-0.555733	0.552685		0.230291	0.235899	2.2429	4.05373	5.47002e-15	0.168846	0.958215
Glyma.02G001500	11.451	7.86094	52.3886	3.34609	2.33519e-38	-0.495245	0.335359		9.49074	6.93402	28.2344	2.88554	2.71267e-37	-0.549562	0.191283
Glyma.02G001600	27.9327	27.1413	21.6573	0.290578	0.0452667	-0.0240004	0.969085		21.0584	20.273	16.1144	0.539449	0.000330354	-0.150531	0.712838
Glyma.02G001700	73.1336	65.1521	221.179	2.37354	3.26487e-65	-0.13934	0.710718		45.73	40.9292	107.924	2.26103	2.00055e-45	-0.253548	0.500422
Glyma.02G001900	36.3966	39.3823	95.7784	1.89882	3.74343e-44	0.134608	0.716911		34.858	37.0784	112.925	2.46614	6.01888e-68	-0.0047342	1
Glyma.02G002000	8.38989	9.45173	68.2626	3.46403	5.74494e-193	0.192532	0.516777		19.1692	15.9308	188.249	4.42523	5.08879e-287	-0.360689	0.0952952
Glyma.02G002100	2.41484	2.26549	0.245708	-2.60534	0.0014145	-0.0707117	0.981952		2.67695	2.12486	0.232415	-2.34042	0.00776885	-0.447165	0.757814
Glyma.02G002200	1.82773	1.8928	0.324668	-1.90939	0.000128746	0.0590325	0.975483		0.455578	0.469706	0.181189	-0.502378	0.427813	-0.0364805	0.999279
Glyma.02G002300	52.3103	47.5886	9.19544	-1.74961	2.23259e-18	-0.117905	0.819084		185.28	151.748	18.2265	-2.18839	2.01851e-48	-0.382073	0.0788642
Glyma.02G002500	80.5228	74.6636	2.28648	-4.41934	2.62142e-250	-0.0859858	0.667555		35.7512	40.4838	0.774988	-4.841	8.00928e-90	0.0839719	0.86592
Glyma.02G002800	143.432	123.294	25.5893	-1.6658	2.19417e-43	-0.197256	0.343564		230.422	207.136	37.5361	-1.59919	2.34699e-38	-0.248397	0.255752
Glyma.02G002900	7.32641	5.40046	2.56596	-0.472143	0.0499194	-0.41143	0.288731		4.32574	4.45141	1.48806	-0.712944	0.0119354	-0.0570374	0.962567
Glyma.02G003000	1.4486	1.0953	1.34993	0.885526	0.103993	-0.358464	0.824596		2.86436	3.22785	3.01789	0.804613	0.0520644	0.047935	0.987691
Glyma.02G003100	23.1962	19.908	2.49885	-2.39504	1.18807e-44	-0.202912	0.486299		11.7434	10.352	0.772902	-2.86306	6.71503e-24	-0.274099	0.542757
Glyma.02G003200	17.8006	18.141	26.5519	1.16249	5.77666e-36	0.0493152	0.877585		5.78673	6.63431	6.61489	0.850431	7.05186e-05	0.10527	0.900321
Glyma.02G003300	66.6032	56.1357	31.6591	-0.219159	0.0348621	-0.222742	0.166144		80	66.1873	39.7454	0.127112	0.221706	-0.367967	0.00349379
Glyma.02G003400	6.44837	5.93062	0.172122	-4.46786	7.27897e-22	-0.103349	0.883407		5.60757	5.23971	0.220906	-3.63655	2.86906e-11	-0.199283	0.812518
Glyma.02G003500	5.75209	4.20941	0.357362	-2.94129	3.18023e-12	-0.435697	0.387		2.98681	2.44714	0.199147	-2.8125	4.7407e-05	-0.386411	0.694697
Glyma.02G003600	9.26035	12.3441	0.862716	-3.22102	3.0395e-29	0.425353	0.229582		3.21034	5.14356	0.376634	-2.80821	2.96136e-11	0.601936	0.226986
Glyma.02G003800	19.9752	14.9738	0.112729	-6.44379	1.39578e-17	-0.394566	0.209045		13.6245	10.8313	0.146307	-5.3725	4.01956e-18	-0.427465	0.100899
Glyma.02G004000	15.1542	14.2701	9.7982	0.0713392	0.654831	-0.0729136	0.87914		19.3695	19.7996	7.40326	-0.561481	0.0011771	-0.0718017	0.904105
Glyma.02G004100	61.8963	51.9652	9.25499	-1.898	4.4477e-20	-0.228545	0.573989		239.705	179.487	19.7004	-2.31989	9.30691e-50	-0.512512	0.00504173
Glyma.02G004200	37.9947	34.3015	13.3898	-0.755267	6.24956e-06	-0.126646	0.781027		10.1067	11.1417	3.27066	-0.890218	1.4218e-05	0.0436462	0.964295
Glyma.02G004400	22.1899	21.0245	9.90395	-0.483755	0.000595558	-0.055357	0.902781		41.526	37.2061	6.61835	-1.6499	7.65066e-23	-0.251398	0.324924
Glyma.02G004500	3.49232	2.85016	0	-3.45812	0.0562521	-0.284554	0.95961		2.81499	2.96563	0.168445	-3.19489	0.0253391	-0.0210114	1
Glyma.02G004600	8.40772	11.2469	0.207856	-5.11123	9.44574e-11	0.447212	0.495163		6.58611	7.67048	0.303924	-3.81842	1.17493e-09	0.134681	0.913908
Glyma.02G004800	1.02137	1.64244	0.269294	-1.99853	0.00249025	0.706897	0.554993		2.0226	2.13172	0.46424	-1.29085	0.0676205	0.0125784	1
Glyma.02G005000	35.9691	33.0044	20.3993	-0.0834283	0.450348	-0.107237	0.661631		23.6522	23.774	11.2445	-0.230347	0.131801	-0.0834662	0.866082
Glyma.02G005100	33.3937	33.2214	7.12581	-1.61291	2.83508e-33	0.017279	0.975964		17.1598	19.9417	4.90024	-1.18	4.10499e-12	0.121897	0.784248
Glyma.02G005200	25.1002	22.115	16.0204	0.142897	0.314965	-0.161168	0.59078		29.9175	26.3038	17.8671	0.295201	0.0441027	-0.275029	0.277741
Glyma.02G005400	1.11004	0.711337	6.20727	3.7455	1.63575e-05	-0.576496	0.852288		1.19767	1.60229	6.2463	2.85578	1.53219e-12	0.305968	0.862469
Glyma.02G005500	159.529	116.799	89.4154	0.226348	0.0224989	-0.426895	0.000344788		411.372	349.474	132.385	-0.538701	5.00529e-06	-0.329175	0.0676066
Glyma.02G005600	7.46489	4.17309	6.3015	1.20229	0.00132578	-0.807775	0.194532		1.04802	0.884612	0.658729	0.463044	0.499162	-0.337002	0.881315
Glyma.02G005700	12.8064	11.8267	14.1694	0.866169	9.64764e-08	-0.0885928	0.870478		7.19864	6.35589	4.94525	0.490261	0.00906354	-0.273091	0.481411
Glyma.02G006000	7.52745	8.9494	22.9745	1.97774	3.89591e-40	0.270525	0.420473		4.11002	4.75028	8.36136	1.67614	1.98499e-13	0.095031	0.925068
Glyma.02G006300	0.964321	1.37429	0.218652	-1.90491	0.339168	0.532013	0.92846		0.102419	0.350686	0	-1.53214	0.579737	1.53392	0.871456
Glyma.02G006400	14.6025	12.3496	5.32716	-0.62122	0.0352377	-0.226602	0.755414		10.2916	8.77071	2.39387	-1.03778	0.00111636	-0.340729	0.598458
Glyma.02G006500	12.7446	10.6952	7.6408	0.121903	0.464461	-0.221194	0.48656		4.81417	3.98765	2.62713	0.285031	0.319632	-0.36865	0.520392
Glyma.02G006600	17.2267	14.779	0.43696	-4.45571	2.57345e-33	-0.19783	0.621548		33.8879	34.961	0.953647	-4.33655	2.15009e-49	-0.0476798	0.924716
Glyma.02G006800	3.03198	2.41887	0.29477	-2.44052	0.00267317	-0.266258	0.888636		3.36494	3.7512	0.0863646	-4.52732	5.81038e-07	0.0716103	0.964904
Glyma.02G006900	5.73759	4.85835	0.127182	-4.64414	5.13337e-07	-0.227357	0.846417		1.04356	1.22537	0.108068	-2.58598	0.000930806	0.134703	0.947774
Glyma.02G007000	0.343673	0.2847	6.12766	5.04602	1.12024e-07	-0.301772	0.946475		0.072912	0.110499	1.33661	4.35131	0.000790513	0.903272	0.893752
Glyma.02G007100	2.30608	1.97936	0.36027	-1.83208	4.48577e-05	-0.211914	0.844192		1.26694	1.17441	0.0204648	-4.91211	0.000136369	-0.177432	0.918716
Glyma.02G007200	3.26436	3.90111	1.26734	-1.01249	0.00341985	0.273858	0.740141		1.36145	1.38885	0.605975	-0.331354	0.6112	-0.0617467	0.987389
Glyma.02G007400	0.836837	1.17856	0.44245	-0.757007	0.49199	0.519577	0.870977		2.05506	1.52635	1.10794	0.349794	0.664368	-0.497015	0.836262
Glyma.02G007600	12.3756	15.415	0.56124	-4.15541	1.25573e-33	0.331361	0.385005		5.12013	6.47324	0.11286	-4.96322	9.07309e-13	0.252695	0.700229
Glyma.02G007700	62.2911	52.8192	187.896	2.43857	2.52679e-210	-0.213649	0.0931673		23.3626	28.748	68.2864	2.108	1.73989e-96	0.204512	0.34238
Glyma.02G007800	13.2112	13.0604	21.0423	1.30024	7.39297e-12	0.00309153	1		5.36034	7.26841	5.85454	0.546126	0.0583092	0.336116	0.645684
Glyma.02G008000	14.3878	13.3971	26.988	1.60863	2.03552e-24	-0.0850019	0.876556		2.2811	3.15522	5.4291	1.63174	1.80523e-13	0.371549	0.483058
Glyma.02G008100	21.6912	23.6249	0.575197	-4.73587	1.90965e-25	0.137577	0.83979		11.432	14.218	0.816571	-3.26771	5.57919e-24	0.221829	0.619002
Glyma.02G008200	0.588771	0	3.12914	3.6951	0.0903893	-0.850607	0.916949		0.20854	0.866846	2.10208	2.08241	0.182261	1.85698	0.729676
Glyma.02G008500	12.1665	12.2605	10.4232	0.390402	0.136537	0.0432351	0.969033		11.5243	11.7088	6.46686	-0.0115618	0.970444	-0.0698137	0.948919
Glyma.02G008600	82.9344	73.3533	96.6798	1.00772	2.60451e-33	-0.151098	0.351043		47.4869	55.9221	58.3938	0.92198	1.09744e-23	0.142685	0.50458
Glyma.02G008700	0.899323	1.30095	0.208527	-2.00961	0.193829	0.537843	0.892927		0.325558	0.395706	0.112951	-1.01967	0.604798	0.133849	0.996036
Glyma.02G008800	22.3918	23.5969	37.6682	1.30375	3.96936e-10	0.0884349	0.906577		26.7465	36.8992	45.4977	1.15908	1.58981e-12	0.377193	0.21977
Glyma.02G009000	12.4748	11.9243	9.13507	0.229931	0.233677	-0.0492115	0.942749		19.3563	21.4377	34.6593	1.53905	1.27182e-15	0.0611663	0.949264
Glyma.02G009100	19.3303	25.7051	35.7972	1.09981	1.55967e-10	0.43648	0.138165		6.16165	9.83781	10.8168	0.986407	1.68539e-05	0.573745	0.154492
Glyma.02G009200	54.5	40.7874	36.4329	0.446541	0.00010824	-0.391042	0.0116259		38.307	38.7724	24.9298	0.22132	0.0553525	-0.0762933	0.840796
Glyma.02G009300	1.34526	1.18629	0	-5.03669	0.000335728	-0.170289	0.953251		0.382574	0.231364	0	-2.78029	0.103765	-0.801401	0.8507
Glyma.02G009400	1.96608	0.377074	1.65366	2.88763	0.0377848	-2.46672	0.32728		1.05255	1.95923	3.94311	1.89064	0.000331682	0.696785	0.651855
Glyma.02G009500	3.16983	3.87458	1.51178	-0.767472	0.408085	0.363172	0.895463		25.9737	22.3546	6.1051	-0.989702	9.93379e-05	-0.312108	0.494097
Glyma.02G009600	43.7113	32.6206	10.806	-0.98722	1.45291e-08	-0.397919	0.114643		269.843	232.458	69.8698	-0.872962	1.35018e-13	-0.309842	0.0682424
Glyma.02G009700	16.4789	17.8697	5.90863	-0.979881	2.39177e-05	0.125486	0.852288		4.60111	3.78282	1.34145	-0.649003	0.0170492	-0.379793	0.399689
Glyma.02G010200	3.81082	4.47782	3.90432	0.421762	0.410541	0.230258	0.889605		10.0673	9.4563	13.1392	1.34057	1.91066e-08	-0.186057	0.819
Glyma.02G010300	19.2497	14.1259	14.6913	0.660683	0.00988937	-0.415666	0.390328		36.3348	37.655	9.11068	-1.18609	1.05456e-05	-0.0418948	0.97924
Glyma.02G010400	17.3198	20.1091	31.2109	1.24964	0.0227597	0.242161	0.902781		16.587	13.7108	10.4223	0.522498	0.359738	-0.385426	0.822313
Glyma.02G010500	58.6187	64.6767	27.268	-0.640729	1.55256e-08	0.162355	0.470027		25.5533	23.6078	6.36389	-1.02801	8.13245e-11	-0.204875	0.535937
Glyma.02G010600	9.08607	10.6297	1.49768	-2.19086	1.90634e-08	0.249958	0.787495		6.34221	6.58008	1.33756	-1.4858	2.4402e-06	-0.0478467	0.972415
Glyma.02G010700	16.2007	15.3049	21.9274	1.12901	9.51382e-12	-0.0569397	0.927142		5.68524	7.40753	5.84863	0.519634	0.0426226	0.300938	0.638648
Glyma.02G010800	0.773456	0.71734	1.35739	1.56477	0.203452	-0.137833	0.985857		0	0.285554	0.440135	1.55418	0.419774	2.4979	0.64223
Glyma.02G010900	9.37695	8.66308	11.5014	1.01952	6.10294e-05	-0.096561	0.916241		7.7626	7.76283	5.78319	0.433677	0.0781249	-0.0832572	0.931471
Glyma.02G011000	22.6144	24.198	4.6636	-1.79189	0.0649768	0.116234	0.976687		0.803335	2.11664	0	-2.53041	0.200289	1.18407	0.843605
Glyma.02G011100	18.4181	17.3191	18.4353	0.694317	2.07885e-07	-0.0665247	0.883161		21.4346	21.1116	8.36754	-0.473109	0.00111681	-0.116487	0.759891
Glyma.02G011200	11.336	10.6549	0.485809	-3.8529	2.53109e-07	-0.0731538	0.963494		7.16963	6.21065	0.351339	-3.24294	1.82216e-07	-0.309053	0.70098
Glyma.02G011300	4.15424	2.83358	1.34612	-0.46413	0.367019	-0.525487	0.59918		6.95377	5.50672	4.37735	0.515742	0.156225	-0.432444	0.594778
Glyma.02G011400	12.2223	13.9209	9.03208	-0.0120719	0.938052	0.204638	0.453967		3.9934	5.37848	1.39767	-1.10255	0.000121689	0.335997	0.554189
Glyma.02G011600	17.4216	16.2442	25.1439	1.24195	1.03714e-07	-0.0884998	0.91783		2.00699	2.73365	2.32383	0.591356	0.399722	0.385703	0.877554
Glyma.02G011700	17.4461	23.4464	58.058	1.88671	7.02281e-08	0.490655	0.587174		7.08782	9.3349	4.26577	-0.32132	0.670425	0.319165	0.898985
Glyma.02G011800	17.5652	15.3858	14.7402	0.546436	0.00160164	-0.164886	0.705956		75.254	67.984	28.9297	-0.367388	0.00289528	-0.244532	0.228133
Glyma.02G012100	12.5822	12.8382	13.7708	0.699888	7.42858e-08	0.0563783	0.899621		7.24369	8.26789	5.44778	0.262098	0.148481	0.0969668	0.878837
Glyma.02G012200	2.62242	4.1104	7.90627	1.51096	0.0147292	0.711157	0.681304		0.347743	0.44911	0.373611	0.630786	0.65569	0.284846	0.965818
Glyma.02G012300	5.38642	4.71806	0.22448	-3.82124	1.39143e-07	-0.197986	0.888806		12.4926	10.8774	0.730213	-2.98255	1.60454e-12	-0.293957	0.59167
Glyma.02G012400	27.7955	31.5598	22.4825	0.12539	0.545749	0.204541	0.663442		60.5726	46.6353	29.5853	0.208585	0.308357	-0.476248	0.121905
Glyma.02G012500	0.859888	0.524086	19.0155	5.93642	9.97444e-08	-0.88231	0.824793		1.21098	0.584258	146.739	8.90737	1.46325e-55	-1.29616	0.332094
Glyma.02G012700	22.1783	30.0064	20.5329	0.0788019	0.754068	0.453263	0.269929		53.5275	58.5472	54.6024	0.755317	2.58569e-05	0.0359302	0.970826
Glyma.02G012800	17.7233	13.8324	13.3371	0.553547	1.69211e-06	-0.336626	0.0459519		12.9112	10.2565	4.60198	-0.293118	0.149087	-0.429051	0.140507
Glyma.02G012900	52.3563	46.8509	60.628	0.980644	2.67935e-37	-0.13752	0.356247		12.9567	15.0801	12.8663	0.626993	1.3161e-07	0.124152	0.711174
Glyma.02G013000	13.126	11.5126	0.103272	-6.22271	1.11664e-12	-0.169406	0.786793		4.89008	5.20036	0.128787	-4.42229	1.05343e-06	-0.00890184	1
Glyma.02G013200	0.26701	0.137322	1.13895	3.58749	0.0289328	-0.797301	0.897927		0	0	0.33671	4.59461	0.0161535	0	1
Glyma.02G013300	3.51164	3.4731	0.288864	-2.96732	3.87266e-08	-0.000287761	1		1.78253	1.95693	0.352173	-1.57101	0.00169618	0.0544464	0.983278
Glyma.02G013400	5.76322	6.43278	1.33347	-1.66105	6.4903e-07	0.190714	0.821992		7.16475	7.35268	0.540767	-2.86305	1.07975e-07	-0.0466821	0.979138
Glyma.02G013500	50.8258	41.9718	0.68418	-5.34687	1.5112e-100	-0.250528	0.151032		11.0937	9.68035	0.149613	-5.11941	9.32545e-29	-0.289155	0.264264
Glyma.02G013600	13.5294	13.1539	12.741	0.559456	0.000676865	-0.0178855	0.98618		48.6101	53.3983	22.0937	-0.417433	0.0030918	0.0386376	0.948904
Glyma.02G013700	33.5673	29.2092	75.8968	1.99757	8.41251e-22	-0.170487	0.773892		7.3617	6.92141	9.35092	1.2871	2.08894e-06	-0.179222	0.85724
Glyma.02G013800	0.742919	0.380921	0.233156	-0.120811	0.900672	-0.905895	0.614534		1.01498	0.836063	0.18453	-1.27435	0.162281	-0.371984	0.8736
Glyma.02G013900	5.54881	6.12364	0.127731	-5.02736	1.46908e-12	0.16501	0.855901		8.34523	8.77939	0.16953	-4.72221	2.89524e-11	-0.0315217	0.989246
Glyma.02G014000	77.183	52.1531	23.3272	-0.551464	1.85665e-05	-0.539274	0.0004684		171.613	136.154	26.7847	-1.47965	1.958e-26	-0.428517	0.0271952
Glyma.02G014100	11.1756	12.7607	7.51605	-0.149978	0.501613	0.202174	0.695466		12.4796	15.3122	5.29674	-0.661831	0.00313973	0.191419	0.72981
Glyma.02G014200	22.8057	17.5731	19.3919	0.751318	3.70011e-10	-0.353692	0.0460458		9.96174	9.80417	7.91272	0.543608	0.00340584	-0.116361	0.857295
Glyma.02G014500	3.11498	3.66822	0.429895	-2.48273	0.0307472	0.276209	0.923112		2.10819	2.19195	0.336936	-1.95753	0.0425573	-0.0167713	1
Glyma.02G014700	3.43906	4.01402	0.347777	-2.90008	2.72215e-07	0.229833	0.846844		3.16379	5.38906	0.421035	-2.78408	4.00396e-05	0.665089	0.471221
Glyma.02G014800	8.45916	5.17547	69.5904	4.34985	4.80586e-125	-0.684329	0.0222352		9.93115	7.45708	42.531	3.35987	9.85511e-80	-0.499342	0.124264
Glyma.02G014900	0.207274	0.21761	30.2387	7.64266	8.28384e-10	0.111183	0.994602		2.34854	0.375856	111.356	9.13863	1.44035e-41	-2.93872	0.00216037
Glyma.02G015000	0.315494	0	26.319	8.81086	1.07904e-12	-1.74626	0.652519		0.185603	0	128.36	12.8987	2.45592e-26	-2.77996	0.326775
Glyma.02G015100	14.8405	15.96	6.93902	-0.583672	0.0982568	0.13349	0.902323		51.2867	57.9262	20.1781	-0.659246	0.00382647	0.0830457	0.92567
Glyma.02G015200	23.2344	20.0418	5.66503	-1.2114	0.000273705	-0.192419	0.81778		28.9788	30.886	10.0714	-0.761427	7.58701e-05	-0.0024693	1
Glyma.02G015300	37.5722	50.0314	75.4237	1.20383	6.9369e-28	0.434183	0.00642421		21.835	26.2246	122.113	3.08177	7.34066e-73	0.172212	0.744239
Glyma.02G015400	4.38425	8.61659	12.6189	1.18526	0.00401389	0.973773	0.234031		0.14628	0.114228	1.06311	4.02882	0.0040449	-0.063187	1
Glyma.02G015500	21.2414	19.2534	1.4498	-3.12129	1.61747e-51	-0.117764	0.772325		11.5169	15.6459	2.0275	-2.10736	6.8734e-27	0.351467	0.222705
Glyma.02G015600	23.4821	27.1075	21.3872	0.290548	0.235957	0.229324	0.696598		7.96094	12.1152	16.7186	1.31957	2.1187e-08	0.501562	0.273031
Glyma.02G015700	15.7821	13.1614	7.80569	-0.152349	0.414254	-0.235404	0.512308		36.5288	32.7391	15.1875	-0.248624	0.0581721	-0.257139	0.208592
Glyma.02G015800	0.514564	0.146472	2.42562	4.61705	4.66847e-14	-1.71176	0.095853		0.56296	0.329285	5.66213	4.91321	1.24436e-25	-0.87688	0.477545
Glyma.02G015900	24.141	21.8911	6.38308	-1.17617	3.69604e-06	-0.11701	0.876241		68.7985	55.8347	20.7645	-0.567611	0.00032369	-0.399102	0.0671594
Glyma.02G016000	59.4099	48.3954	13.8255	-1.20087	6.5195e-12	-0.275294	0.349042		149.369	126.168	19.0968	-1.8622	5.32998e-21	-0.337794	0.365963
Glyma.02G016100	1.76154	1.74751	43.9619	5.27151	8.82459e-28	0.0226969	0.998351		2.39032	1.92436	27.2509	4.68677	4.48126e-41	-0.390813	0.737337
Glyma.02G016400	79.8531	90.3483	0.268706	-7.75203	4.6953e-43	0.199741	0.409427		92.0476	137.823	0.218304	-8.39882	2.14721e-50	0.484874	0.00103637
Glyma.02G016500	13.5005	14.9206	0.0423937	-7.80825	1.35378e-13	0.167465	0.729591		12.9169	14.9968	0.139758	-5.87276	5.09111e-18	0.116391	0.860471
Glyma.02G016600	0.736441	1.28887	0	-5.19031	0.000376748	0.846966	0.709433		0.719877	1.12487	0	-5.23919	8.31302e-05	0.584246	0.737376
Glyma.02G016900	35.7483	33.5247	11.4001	-0.961729	0.000373287	-0.0574679	0.950001		73.5891	70.9667	17.6109	-1.14096	2.21149e-13	-0.151064	0.686127
Glyma.02G017000	1.06866	2.39358	2.21319	0.49693	0.57914	1.20844	0.573055		4.13109	3.99892	4.33431	0.994365	0.0179433	-0.168172	0.918716
Glyma.02G017100	1.88523	0.999805	26.2797	5.39149	1.63915e-18	-0.949473	0.521398		3.8734	1.75994	28.4255	4.88173	2.40134e-33	-1.24547	0.0743733
Glyma.02G017200	16.8741	9.77824	26.2939	2.04704	4.79278e-33	-0.770064	0.000708644		10.9605	7.421	14.6753	1.84683	1.04459e-18	-0.664885	0.0380057
Glyma.02G017300	1.10007	1.60466	0.0828866	-3.4944	0.028443	0.538215	0.882335		0.227263	0.569601	0	-2.67219	0.191144	1.25284	0.838576
Glyma.02G017400	15.1512	14.0229	4.88007	-0.91972	5.76409e-11	-0.0876426	0.818805		8.09702	10.8168	2.33047	-1.34782	1.66239e-09	0.316072	0.434031
Glyma.02G017500	30.3658	26.8025	18.1852	0.0566419	0.720034	-0.159053	0.63374		38.3009	33.7536	45.8388	1.30237	2.87839e-22	-0.27802	0.282723
Glyma.02G017800	63.2361	56.14	7.24727	-2.3487	1.07234e-38	-0.150505	0.662601		229.959	183.655	20.1302	-2.32048	1.89864e-31	-0.418283	0.226765
Glyma.02G018000	75.8948	67.6751	45.1159	0.0152656	0.917461	-0.141041	0.643444		99.9548	111.956	51.5864	-0.257233	0.0205647	0.0702322	0.851992
Glyma.02G018100	26.6437	39.5181	23.3587	-0.139066	0.771189	0.577047	0.552685		5.63084	4.33459	4.61636	0.979408	0.162957	-0.481232	0.826744
Glyma.02G018200	21.0685	22.745	18.1968	0.287262	0.2457	0.133155	0.861762		45.2555	46.0608	13.0083	-0.960475	2.28488e-05	-0.0690738	0.926218
Glyma.02G018300	23.9617	22.1987	31.8671	1.13457	1.42846e-12	-0.0891741	0.86649		14.3053	14.2957	21.9806	1.47853	1.35371e-12	-0.109449	0.896336
Glyma.02G018400	0	0	0	NA	NA	NA	NA		0.62152	1.1479	2.55714	2.09739	0.0391526	0.700512	0.874693
Glyma.02G018500	2.33931	1.69957	4.1521	1.87035	0.00939599	-0.385556	0.876483		1.11037	0.80064	3.94315	3.20824	1.73254e-10	-0.62977	0.678757
Glyma.02G018600	7.14824	6.45999	1.0341	-2.06361	1.22938e-05	-0.114283	0.93163		0.812366	1.05996	0.0762216	-2.94925	0.00830271	0.243876	0.938692
Glyma.02G018800	0.232295	0.0655443	1.41923	4.97339	2.29635e-05	-1.70786	0.535422		0.262407	0.0889954	0.33914	2.71524	0.107718	-1.43796	0.781466
Glyma.02G018900	1.76109	3.10301	0.893974	-1.2007	0.130487	0.85042	0.608979		5.05939	5.68602	2.38782	-0.351971	0.4258	0.102208	0.954601
Glyma.02G019000	14.2629	13.2653	10.895	0.322323	0.166328	-0.085925	0.910508		9.28668	9.1347	11.548	1.19817	1.16194e-09	-0.101974	0.896508
Glyma.02G019100	38.1818	37.6702	32.0934	0.377395	0.00927458	0.0013076	1		22.0296	24.1443	19.143	0.530589	2.7184e-05	0.0307291	0.960756
Glyma.02G019200	20.486	28.8817	98.4861	2.37705	1.69772e-45	0.531003	0.0842342		38.5575	43.6725	226.077	3.23059	3.07818e-105	0.0844159	0.892
Glyma.02G019300	24.7054	32.9315	2.36767	-3.19077	3.69719e-82	0.433338	0.0164499		8.16415	13.8711	1.38662	-2.487	1.00911e-25	0.665746	0.0109504
Glyma.02G019400	10.4793	8.6592	1.43439	-1.99944	3.84307e-11	-0.246006	0.671007		17.0655	11.115	1.9053	-1.67924	5.10948e-09	-0.721853	0.0101167
Glyma.02G019500	31.3888	34.9338	52.6048	1.19285	9.05074e-22	0.183673	0.514749		16.5691	20.1404	25.3791	1.19809	5.82657e-16	0.189876	0.630544
Glyma.02G019600	81.9306	93.3359	343.515	2.48883	4.71195e-92	0.216235	0.39994		172.968	172.417	384.799	2.01958	1.00332e-92	-0.100662	0.739307
Glyma.02G019700	25.6504	26.1848	10.8043	-0.666933	6.04627e-05	0.0443782	0.940501		10.0504	10.2708	3.04826	-0.874601	4.31726e-06	-0.0608229	0.93036
Glyma.02G019900	24.3057	21.0026	14.7899	0.101726	0.497815	-0.190952	0.513122		9.23908	10.6164	5.44295	-0.0884272	0.72027	0.0959135	0.904478
Glyma.02G020000	2.29912	3.33274	10.9711	2.33641	1.7583e-15	0.572181	0.413193		6.70219	9.07383	14.9798	1.58997	6.77393e-10	0.354791	0.605548
Glyma.02G020100	13.0155	11.4576	1.03608	-2.89234	3.84533e-10	-0.162002	0.875041		1.51325	1.16696	0.115211	-2.36327	0.0112101	-0.436437	0.813261
Glyma.02G020400	13.2248	16.1598	31.6392	1.58274	1.23464e-32	0.310149	0.216804		2.91452	4.22349	6.75624	1.51257	5.22026e-08	0.441724	0.524468
Glyma.02G020800	25.646	23.4369	26.265	0.775168	5.39571e-14	-0.111241	0.664402		19.9316	19.2022	21.0833	0.996248	1.29692e-12	-0.158561	0.680044
Glyma.02G021000	2.11573	2.40752	0	-5.23745	0.000195575	0.233841	0.931646		0.450583	0.612143	0	-2.78496	0.117308	0.332766	0.961961
Glyma.02G021100	6.69361	7.53891	0	-3.89014	0.0230802	0.147146	0.98349		1.1896	1.19441	0	-1.91322	0.369206	-0.15353	0.995821
Glyma.02G021300	9.58649	12.3171	8.08863	0.0936422	0.938052	0.312007	0.9347		0.271352	0	1.73313	3.85677	0.111066	-0.917535	0.932674
Glyma.02G021400	8.01846	6.83886	4.23139	-0.0814522	0.79959	-0.198625	0.806227		5.96075	8.15643	3.53424	-0.352578	0.299667	0.383676	0.610052
Glyma.02G021500	4.91137	4.00798	0.330141	-3.00648	9.99769e-06	-0.283557	0.818623		2.63108	3.96552	0.470116	-2.26829	0.000110182	0.501105	0.610052
Glyma.02G021600	11.4375	9.8128	2.93099	-1.11789	7.15907e-06	-0.199399	0.729756		14.1309	12.2519	7.61763	0.158861	0.464413	-0.30511	0.451753
Glyma.02G021700	23.6206	23.1897	12.3333	-0.304626	0.0646344	-0.00655137	0.996983		18.5189	21.1122	8.38587	-0.470399	0.00145556	0.0987484	0.826169
Glyma.02G021900	22.2561	14.3324	31.2731	1.73702	1.06389e-61	-0.611423	1.89766e-06		4.02688	2.87623	4.28092	1.41461	6.48204e-08	-0.56139	0.240543
Glyma.02G022000	81.8569	36.105	934.414	5.30307	0	-1.15096	3.96595e-18		34.5576	17.8217	281.018	4.83285	8.47776e-243	-1.04077	1.35832e-09
Glyma.02G022100	5.59173	5.42704	0	-6.46705	5.4892e-07	-0.0277734	0.99506		3.32401	2.61225	0	-6.03762	2.0102e-06	-0.447745	0.674203
Glyma.02G022200	0.17419	0.0231434	12.266	9.37166	1.69836e-14	-2.59146	0.279022		0.0598078	0.115538	3.87509	5.94778	1.0238e-13	1.05118	0.808801
Glyma.02G022300	47.6458	50.5713	11.9028	-1.48455	1.50456e-13	0.11406	0.844261		34.2008	33.7921	7.1552	-1.36609	1.64299e-11	-0.112784	0.867438
Glyma.02G022400	5.60709	5.82251	6.44779	0.760047	0.000304276	0.0773078	0.91783		12.9321	14.2986	11.4981	0.555297	0.000711354	0.0516051	0.942726
Glyma.02G022500	15.3083	12.1746	2.43206	-1.72771	5.39658e-17	-0.30066	0.35657		6.73509	5.26232	1.06361	-1.44994	4.69144e-06	-0.44132	0.346145
Glyma.02G022700	14.62	13.0644	0.09002	-6.53932	5.34085e-18	-0.140954	0.803166		12.9641	15.0614	0.12641	-5.8698	8.81749e-18	0.114363	0.874693
Glyma.02G022800	62.7983	56.4881	35.3713	-0.0643979	0.488039	-0.131557	0.440055		101.245	82.7391	19.0302	-1.25673	1.72908e-28	-0.386307	0.00461322
Glyma.02G022900	0	0	0	NA	NA	NA	NA		1.30947	2.47972	1.02444	-0.465279	0.549037	0.897872	0.595866
Glyma.02G023400	0	0	3.73546	6.37859	6.85841e-06	0	1		0.563846	0.4913	13.0637	5.77075	2.58044e-21	-0.441427	0.881628
Glyma.02G023500	20.0219	20.1767	29.1796	1.15314	7.29638e-11	0.0305486	0.971131		6.33705	6.83239	10.1263	1.42411	1.62048e-10	0.0256729	0.991046
Glyma.02G023800	11.6859	13.5222	17.6848	0.982957	1.82817e-06	0.24628	0.639056		10.6556	10.5252	8.31922	0.535819	0.00659612	-0.116978	0.864831
Glyma.02G023900	1.77728	2.96781	9.97036	2.3585	3.74173e-07	0.761882	0.558607		1.24682	1.31394	4.50577	2.66124	6.7381e-09	-0.00912319	1
Glyma.02G024100	8.25076	6.0125	2.14766	-0.872309	0.00385246	-0.443516	0.37676		2.64219	2.13809	0.876231	-0.411681	0.454405	-0.367432	0.788356
Glyma.02G024200	0.573615	0.744669	26.836	5.82934	2.9888e-28	0.361181	0.846417		0.545228	0.784735	9.25829	4.37462	6.73765e-32	0.473082	0.740137
Glyma.02G024400	24.5641	29.1389	33.1293	0.800627	1.22938e-05	0.264231	0.506626		42.3758	45.2839	16.4131	-0.608236	2.25347e-07	0.0022815	1
Glyma.02G024500	10.1018	10.0019	7.18236	0.135089	0.471625	0.00399284	1		6.64154	7.27051	3.80353	-0.0642756	0.840649	0.0283553	0.99144
Glyma.02G024600	2.90681	3.63581	0.363277	-2.71384	5.81623e-11	0.346563	0.619695		0.600825	1.10294	0.162377	-1.72085	0.152052	0.7777	0.772527
Glyma.02G024700	13.9801	13.9129	1.27214	-2.8472	1.08989e-12	0.0160049	0.994631		2.73101	1.95317	0.280686	-1.87772	0.161471	-0.550906	0.845522
Glyma.02G024900	0.376044	0	0.593767	4.00627	0.0246512	-2.73473	0.459772		1.02843	0.716693	0.645966	0.66925	0.380811	-0.580199	0.779761
Glyma.02G025000	30.5425	26.2424	5.38021	-1.67133	8.15088e-24	-0.20288	0.515207		11.2178	12.9417	1.73517	-2.04327	2.68313e-20	0.104769	0.85724
Glyma.02G025200	21.4572	20.9953	11.7678	-0.232918	0.131129	-0.00200622	1		10.6066	12.7851	3.53888	-0.993042	8.31147e-07	0.177207	0.706374
Glyma.02G025300	1.43152	1.64482	0.0498444	-4.45291	0.000120799	0.214494	0.902868		0.691421	0.958462	0.0865128	-2.53443	0.048931	0.326646	0.914484
Glyma.02G025400	12.7196	13.6231	1.7347	-2.36403	3.49935e-19	0.128868	0.834888		13.4488	14.0095	2.57562	-1.55571	3.87896e-09	-0.0429227	0.967379
Glyma.02G025500	15.5742	15.7366	2.19369	-2.22081	4.07102e-17	0.0354166	0.970075		13.4666	15.6597	2.16879	-1.99385	1.73306e-12	0.114796	0.886138
Glyma.02G025600	9.67586	9.03437	5.11479	-0.212454	0.431602	-0.0730931	0.93309		23.3866	23.9918	12.0474	-0.117504	0.616651	-0.0576777	0.951558
Glyma.02G025700	5.43669	7.20211	0.601202	-2.94429	3.81108e-07	0.422082	0.671007		3.46173	6.00087	0.461323	-2.72343	4.68643e-06	0.697672	0.389167
Glyma.02G025800	2.88526	2.68186	0	-3.21862	0.139844	-0.105544	0.994756		2.70491	3.24405	0.154761	-3.16621	0.0284625	0.131083	0.978547
Glyma.02G025900	36.025	37.5846	36.5951	0.577396	2.31655e-06	0.078209	0.838604		35.908	38.7496	22.9626	0.101517	0.434498	0.0196452	0.976941
Glyma.02G026000	11.5111	12.0543	7.62476	-0.0561419	0.81462	0.0838405	0.907364		8.57244	9.41375	3.05948	-0.774142	0.0115042	0.0279915	0.991637
Glyma.02G026100	0.735482	0.890568	5.41533	3.22454	1.16717e-16	0.278113	0.854135		0.0862241	0.148489	1.46417	4.42062	0.000532878	0.162903	0.993393
Glyma.02G026300	61.5775	71.2953	121.601	1.38037	1.1301e-30	0.23935	0.298104		43.2441	56.2574	82.6921	1.41621	2.68103e-22	0.289064	0.327247
Glyma.02G026400	21.6436	21.9423	12.4175	-0.221128	0.156243	0.0392054	0.942808		20.0395	19.4127	25.8901	1.27231	3.32813e-10	-0.134023	0.858738
Glyma.02G026500	23.1734	23.9753	5.83673	-1.43309	1.85268e-08	0.0698832	0.929634		3.05888	3.13312	0.986548	-0.750907	0.0789414	-0.0842948	0.962567
Glyma.02G026600	22.8864	23.0298	17.1956	0.177405	0.318444	0.0319148	0.963728		5.95691	6.31402	5.38844	0.637541	0.0101043	-0.0119237	1
Glyma.02G026700	43.9128	40.5257	49.8677	0.90665	9.01796e-32	-0.0921741	0.616988		14.2419	17.0355	20.1769	1.10606	3.78529e-16	0.164829	0.651975
Glyma.02G026800	28.2038	29.481	10.1168	-0.943606	4.54602e-10	0.0830655	0.854108		41.532	42.8546	12.8086	-0.8751	1.13095e-11	-0.0515826	0.907108
Glyma.02G026900	34.4082	53.6424	11.766	-1.57812	1.78756e-19	0.669944	0.00102568		22.5876	33.5863	10.8616	-0.780764	1.05986e-06	0.47554	0.0284314
Glyma.02G027000	0.231287	0.32966	0.296899	0.479376	0.821923	0.633169	0.930526		2.20429	1.20052	0.65235	-0.0305088	0.966206	-0.98221	0.253701
Glyma.02G027100	29.6969	30.7669	37.5583	0.888486	1.42678e-13	0.0734591	0.849797		10.0449	10.2759	12.9612	1.20163	3.83462e-12	-0.0654225	0.929611
Glyma.02G027200	0.750492	1.08639	0.201423	-1.75009	0.0831687	0.542707	0.835526		0.141932	0.226812	0.0383785	-1.74192	0.22393	0.569812	0.881614
Glyma.02G027400	4.43489	4.53432	1.4408	-1.06566	0.0629128	0.0678716	0.978815		7.23279	9.31803	3.48904	-0.558663	0.0691582	0.276512	0.704598
Glyma.02G027500	9.72153	10.1549	2.25459	-1.55847	1.20916e-09	0.0778762	0.919949		5.98098	6.36644	1.15486	-1.58888	6.33601e-05	0.00928777	1
Glyma.02G027600	10.0226	8.38184	4.02555	-0.431439	0.08547	-0.246199	0.657189		12.0272	12.7577	7.24072	0.0324797	0.889419	-0.0130645	1
Glyma.02G028000	106.797	41.0855	0.177402	-7.2809	9.3142e-12	-1.34284	8.8807e-07		255.76	117.056	0.1751	-8.43361	3.1927e-28	-1.22034	2.66394e-06
Glyma.02G028100	46.3788	38.5252	29.9073	0.22091	0.413576	-0.244553	0.699034		12.0019	8.9774	6.37336	0.366543	0.194416	-0.521709	0.278402
Glyma.02G028200	343.812	253.704	1.43083	-6.87619	1.1654e-76	-0.406901	0.175856		2421.14	2147.2	9.79951	-6.91252	1.17453e-264	-0.2656	0.533386
Glyma.02G028300	17.9743	12.0485	0.143799	-5.74937	5.95644e-06	-0.545293	0.519663		4.1055	2.24339	0	-4.57888	0.000650498	-0.997664	0.405423
Glyma.02G028400	0.814151	0.235035	1.52873	3.35622	0.0382565	-1.79074	0.657478		4.10593	5.91006	15.4808	2.22601	2.11363e-13	0.410384	0.649135
Glyma.02G028700	0.638321	0.727265	4.08119	3.12287	6.67884e-19	0.18434	0.892334		4.72444	5.81252	31.1362	3.27634	7.18411e-83	0.195073	0.727412
Glyma.02G028800	2.4949	0.556676	2.20594	2.62175	0.00173782	-2.16073	0.0910462		2.93163	1.14017	1.71401	1.44266	0.0113395	-1.48187	0.0813229
Glyma.02G029200	0.199596	0.214344	6.20893	5.55083	9.87934e-07	0.111202	0.992964		0.125662	0.105564	2.14679	5.24615	6.31848e-08	-0.359439	0.950386
Glyma.02G029300	25.7119	24.7966	18.0258	0.15021	0.251864	-0.0333557	0.942514		24.4735	26.7619	9.60397	-0.614887	8.98255e-05	0.0323522	0.96325
Glyma.02G029600	25.6358	21.9907	15.01	0.0600209	0.736241	-0.198156	0.579288		26.1763	27.133	11.9389	-0.331376	0.0775941	-0.0452502	0.958103
Glyma.02G029800	8.93832	7.65468	5.97517	0.253172	0.099	-0.204941	0.510847		10.5214	8.07948	3.94339	-0.180485	0.459132	-0.473934	0.18448
Glyma.02G029900	2.90811	0.539837	0.193386	-0.813025	0.478473	-2.43313	0.0347296		4.25173	1.21755	0.716371	0.0367801	0.954498	-1.89677	0.000319313
Glyma.02G030000	2.44395	2.11731	1.09907	-0.358765	0.433393	-0.165927	0.90397		0.225463	0.403156	0.396806	0.875093	0.278243	0.695297	0.786905
Glyma.02G030100	12.8138	10.1756	6.51189	-0.0336516	0.884062	-0.314997	0.419915		8.68084	7.11376	7.24282	0.885265	9.73932e-05	-0.370374	0.428371
Glyma.02G030200	15.9924	16.0983	28.9377	1.45436	6.75829e-18	0.0298219	0.970348		14.6581	15.6731	25.8889	1.58915	2.04769e-20	0.00739634	1
Glyma.02G030300	1.61482	3.31957	0.552332	-1.95405	0.00154922	1.05301	0.273105		1.02385	1.80133	0.365749	-1.36133	0.101063	0.686189	0.717704
Glyma.02G030400	6.89679	4.30838	0.920195	-1.5767	0.347912	-0.644642	0.87821		0.389347	0.228217	0.296498	0.919321	0.749349	-0.748406	0.950172
Glyma.02G030500	4.59307	3.71426	1.18473	-1.05106	0.0802978	-0.279072	0.864113		1.30255	0.63033	0.447667	0.324292	0.660396	-1.11413	0.316381
Glyma.02G030600	0	1.10088	0	-0.964954	0.836714	1.07295	0.945186		0	0	0	NA	NA	NA	NA
Glyma.02G030700	1.0939	1.30583	12.3231	3.84111	4.04229e-31	0.305594	0.80866		0.147818	0.256645	1.25814	3.17141	9.24526e-09	0.550332	0.811367
Glyma.02G030800	9.96111	11.1846	39.7561	2.44902	5.03963e-24	0.195177	0.807354		6.73091	6.95613	29.031	2.91653	1.76085e-50	-0.0500934	0.966034
Glyma.02G030900	18.7049	14.1352	9.94249	0.106798	0.614331	-0.379858	0.251485		38.4108	35.1999	15.8043	-0.293386	0.098153	-0.229014	0.534237
Glyma.02G031000	12.2035	11.4409	0.109613	-6.07031	7.03823e-19	-0.0633394	0.931722		10.313	11.4603	0.0672173	-6.32927	4.28529e-13	0.0506992	0.959209
Glyma.02G031100	16.8788	16.3526	3.16064	-1.76446	4.4433e-10	-0.0249068	0.986147		5.47225	5.59249	1.71576	-0.889857	0.036852	-0.0489968	0.984832
Glyma.02G031200	24.4121	20.5764	57.0965	2.08193	6.64852e-24	-0.221009	0.68046		8.3789	6.85855	12.0045	1.67159	2.88345e-19	-0.382099	0.304307
Glyma.02G031300	8.41677	8.23578	29.7041	2.47071	1.04949e-17	-0.0106178	0.999142		3.38098	2.77629	8.08323	2.40152	5.12261e-19	-0.39041	0.588076
Glyma.02G031400	0	0.302043	3.62708	4.14924	1.90708e-05	2.9497	0.279197		0.0782485	0.099093	0.382712	2.70256	0.0511598	0.524756	0.943914
Glyma.02G031500	0.0647933	0	5.93178	7.94619	7.32966e-10	-0.850611	0.884911		0	0	1.90627	7.27348	5.77086e-08	0	1
Glyma.02G031600	28.8057	28.5259	10.5489	-0.826151	0.00056838	0.0124935	0.995305		18.1084	17.3266	4.05217	-1.23753	1.03048e-09	-0.149263	0.766138
Glyma.02G031700	17.8355	20.1359	17.588	0.406748	0.0287859	0.191513	0.673054		9.99929	9.8318	5.77006	0.0835152	0.715444	-0.118362	0.868598
Glyma.02G031800	19.0213	18.7391	5.37386	-1.17932	4.11491e-06	0.00134868	1		6.64637	7.67248	1.98305	-1.07173	0.000134075	0.105062	0.905496
Glyma.02G031900	18.98	21.1807	75.784	2.45475	6.59451e-68	0.173433	0.657606		3.37099	3.89355	8.6795	2.00461	1.84115e-18	0.141701	0.884179
Glyma.02G032100	25.034	33.4149	60.0035	1.45849	8.38738e-65	0.43745	8.2488e-05		5.90541	7.71465	16.0406	1.90936	1.28255e-26	0.289513	0.512205
Glyma.02G032200	5.09606	6.22949	0.66388	-2.6148	5.12645e-13	0.314842	0.619264		1.29101	1.7065	0.329313	-1.48153	0.0190613	0.319142	0.867616
Glyma.02G032300	216.665	197.329	21.3049	-2.60773	5.49988e-36	-0.1122	0.849073		656.432	778.165	100.336	-2.0926	4.82381e-32	0.151351	0.787193
Glyma.02G032400	2.76381	2.59491	0.029272	-5.81152	5.92222e-06	-0.0940338	0.958473		2.88486	4.0568	0.0586157	-5.3547	3.04807e-05	0.371541	0.786638
Glyma.02G032600	1.06511	0.635222	0	-4.4998	0.00653589	-0.773348	0.815213		0.643287	0.765401	0	-4.18428	0.00528117	0.19755	0.96637
Glyma.02G032700	58.1506	57.4239	0.656463	-5.84932	1.90906e-50	0.00876352	0.994901		42.4514	51.033	0.362875	-6.25728	8.7929e-43	0.172074	0.578333
Glyma.02G032800	26.737	21.1711	11.2801	-0.309227	0.0175114	-0.312425	0.104114		54.7848	48.1474	12.3578	-1.10221	2.42195e-17	-0.281991	0.168663
Glyma.02G033100	2.53762	3.52517	3.07401	0.442398	0.342935	0.471274	0.678546		1.21246	2.16843	1.58393	0.395526	0.420322	0.767173	0.446211
Glyma.02G033200	3.98105	4.26879	1.04486	-1.41317	0.00387567	0.113156	0.942073		1.96147	1.69905	0.423992	-1.09355	0.0746653	-0.328231	0.844916
Glyma.02G033300	28.4631	23.9131	24.496	0.646065	3.74728e-10	-0.231069	0.178826		17.4378	17.7968	11.9118	0.273569	0.0804621	-0.065134	0.911463
Glyma.02G033400	27.4479	23.6254	0.804566	-4.26452	1.91459e-38	-0.189665	0.619024		16.0893	16.0047	0.602587	-3.87264	1.27877e-28	-0.103649	0.867788
Glyma.02G033500	48.9823	44.3826	212.974	2.87377	1.55237e-221	-0.116173	0.60455		10.228	11.0071	45.4448	2.90576	2.14289e-102	0.0099601	1
Glyma.02G033600	3.89847	3.7841	15.823	2.68322	1.56707e-52	-0.0205051	0.987507		1.95546	2.1565	8.38779	2.83199	1.10049e-33	0.0488206	0.97513
Glyma.02G033700	10.7173	9.48497	3.22018	-0.954732	0.00689821	-0.142777	0.892743		5.28953	6.32165	2.12856	-0.702256	0.075364	0.159931	0.90218
Glyma.02G033800	0	0	0	NA	NA	NA	NA		3.30095	3.44419	0	-3.19377	0.058655	-0.0557725	1
Glyma.02G033900	39.875	27.6727	4.18767	-2.10871	1.59571e-28	-0.50575	0.0105167		95.2772	73.1485	13.1131	-1.60936	2.25912e-34	-0.478338	0.00041048
Glyma.02G034000	7.00102	8.48603	18.8117	1.77469	1.9602e-15	0.301889	0.576961		5.46693	8.6808	9.0172	0.912184	2.49023e-07	0.56818	0.0396008
Glyma.02G034100	2.17602	2.79369	5.26736	1.52245	0.000155686	0.391026	0.745945		1.52205	1.43206	2.48893	1.62366	0.00128733	-0.127714	0.962342
Glyma.02G034200	4.70167	8.42168	1.79367	-1.60566	4.95355e-05	0.851546	0.139381		0.769367	1.00601	0.289373	-0.961731	0.143001	0.351546	0.85234
Glyma.02G034300	82.8391	109.668	164.029	1.1862	1.89292e-46	0.428701	3.98216e-05		64.1774	86.782	61.4649	0.360447	0.0125651	0.341462	0.154652
Glyma.02G034400	4.87285	5.81338	1.95372	-0.965061	3.54966e-05	0.279804	0.548564		3.30201	3.2779	1.09841	-0.76723	0.0516875	-0.0989387	0.950911
Glyma.02G034500	19.8909	18.9266	0.679512	-4.16495	3.0139e-25	-0.0579883	0.938374		14.6122	16.7121	0.677572	-3.90109	3.62007e-29	0.10406	0.882278
Glyma.02G034600	12.6596	11.3152	2.11143	-1.81798	1.40224e-09	-0.140889	0.853077		25.608	18.839	2.76249	-1.90063	4.33964e-10	-0.546875	0.121066
Glyma.02G034700	56.5183	69.2143	99.2088	1.1265	4.31666e-15	0.319584	0.198622		21.7683	24.3979	40.3756	1.58707	1.57255e-38	0.0663993	0.893745
Glyma.02G034800	26.7059	23.9904	18.2986	0.220218	0.120353	-0.138281	0.677924		56.1355	50.0646	28.7839	0.0716753	0.677846	-0.263731	0.376099
Glyma.02G034900	27.8127	26.6966	25.5975	0.548339	6.65143e-05	-0.0333029	0.949211		62.3337	63.0695	24.8622	-0.476135	0.00572264	-0.0797924	0.898891
Glyma.02G035000	0.827908	0.76353	48.3662	6.60374	3.59546e-129	-0.0905968	0.943344		1.56334	1.32399	142.53	7.54086	3.0358e-184	-0.282703	0.798696
Glyma.02G035200	10.2806	13.3218	20.2236	1.22248	4.73975e-06	0.384946	0.549439		3.66417	3.9474	4.44267	1.04445	0.000562238	-0.00922951	1
Glyma.02G035400	4.60578	4.94392	0	-5.71531	2.59355e-05	0.113721	0.968507		10.9991	12.9181	0.15308	-5.32098	4.46048e-09	0.120492	0.92345
Glyma.02G035500	4.06299	3.35249	0.471427	-2.21395	6.71874e-09	-0.255857	0.733798		1.92072	2.06005	0.0823753	-3.69675	0.00140743	-0.0149485	1
Glyma.02G035600	41.2334	36.9321	30.0084	0.309749	0.0252162	-0.134027	0.690139		212.32	193.238	83.2762	-0.352577	0.000433101	-0.230478	0.147581
Glyma.02G035800	16.789	19.7872	20.3933	0.652882	7.31418e-08	0.258867	0.235434		10.7585	11.5456	8.94464	0.49058	0.00370364	0.00601734	1
Glyma.02G035900	18.9131	20.1508	1.17722	-3.48136	1.95584e-17	0.119151	0.896369		63.3854	66.2534	4.35979	-3.06698	1.50905e-31	-0.03843	0.962626
Glyma.02G036000	88.7708	92.2943	14.2611	-2.09209	5.50382e-46	0.0765389	0.84343		502.266	424.729	43.195	-2.43552	4.64461e-39	-0.334124	0.380745
Glyma.02G036100	7.34277	7.29519	31.3202	2.72277	2.51978e-41	0.0123409	0.995295		3.65385	4.93501	16.0437	2.55193	5.08726e-36	0.353604	0.505777
Glyma.02G036200	15.5826	14.0566	10.5143	0.193945	0.364467	-0.129743	0.830073		28.08	28.6104	18.8202	0.24446	0.169275	-0.0688061	0.916564
Glyma.02G036300	44.1157	32.5268	11.2794	-0.922158	1.13901e-09	-0.409609	0.0456595		108.475	96.9891	21.9965	-1.27851	4.74724e-22	-0.255709	0.273401
Glyma.02G036400	48.8473	28.5091	240.217	3.6932	1.20264e-117	-0.749445	0.000566984		12.2699	8.24408	29.0284	2.68824	4.43667e-39	-0.66837	0.0377165
Glyma.02G036500	51.7031	41.3722	25.0118	-0.114374	0.329749	-0.299145	0.0640101		18.0156	17.3488	15.1396	0.66934	1.40405e-06	-0.146469	0.699507
Glyma.02G036700	15.5953	13.5225	4.2007	-1.08648	8.36485e-08	-0.176735	0.695825		4.23242	3.51575	2.52051	0.381043	0.233667	-0.356851	0.619332
Glyma.02G036800	0.375076	0.722628	0.084713	-2.45138	0.0915173	0.975107	0.737719		8.98743	9.60663	13.1629	1.31775	0.000604643	0.0251606	1
Glyma.02G036900	14.5337	25.4688	0.0602179	-8.11863	3.84342e-34	0.823574	3.98808e-07		5.2252	8.17523	0	-7.50312	1.73801e-09	0.556863	0.414681
Glyma.02G037000	11.2044	8.54275	3.13959	-0.841154	0.00362187	-0.370143	0.487228		15.7638	14.6206	11.6978	0.541205	0.00584912	-0.214046	0.661634
Glyma.02G037100	6.87769	10.924	8.84535	0.318986	0.123401	0.68846	0.0177586		2.42581	3.61802	3.02629	0.598257	0.0381088	0.507684	0.380748
Glyma.02G037400	12.1666	12.8323	1.19513	-2.8241	3.35606e-26	0.101799	0.86735		6.90538	9.13777	1.05889	-2.30795	5.18336e-10	0.32434	0.677596
Glyma.02G037500	19.3754	19.582	21.2319	0.733856	1.054e-05	0.0401589	0.95038		11.5135	11.8654	10.6805	0.703639	0.000222972	-0.0587456	0.945519
Glyma.02G037700	16.4015	16.6104	11.7564	0.104254	0.583026	0.0382901	0.955833		37.7102	41.1413	22.5313	-0.0101723	0.944735	0.0332768	0.951851
Glyma.02G037900	8.97095	6.8052	0.557982	-3.00113	1.80669e-09	-0.394662	0.590574		9.83775	9.21134	0.941517	-2.41036	9.78668e-09	-0.194417	0.831519
Glyma.02G038000	12.315	11.9013	7.89845	0.0146726	0.94636	-0.021669	0.983166		23.7844	24.5875	4.68571	-1.5393	1.64159e-17	-0.0500441	0.93446
Glyma.02G038100	17.4821	15.4155	351.105	5.12383	1.11284e-242	-0.154084	0.713925		34.4554	33.2774	759.571	5.37128	0	-0.142773	0.743659
Glyma.02G038200	0.754872	1.23697	1.93893	1.2905	0.246815	0.716259	0.852288		1.1578	2.11725	0.795546	-0.516541	0.4701	0.754835	0.625897
Glyma.02G038300	21.8391	22.949	39.4734	1.39741	7.16499e-25	0.0840373	0.855167		8.26822	9.62749	12.8056	1.27939	2.61677e-13	0.128557	0.840796
Glyma.02G038400	6.1488	7.06512	1.72514	-1.42043	0.000648294	0.201343	0.862061		3.20244	3.47912	0.812328	-1.23795	0.00314599	0.0445092	0.984848
Glyma.02G038500	5.45262	5.60714	1.89459	-0.956756	7.39008e-06	0.0605702	0.929634		7.73404	7.99433	1.45633	-1.59922	1.05992e-10	-0.0421142	0.966389
Glyma.02G038600	39.857	49.2303	1.02747	-4.97024	0	0.327503	0.00184859		13.0819	14.5221	0.344321	-4.48642	6.70879e-18	0.0504145	0.957674
Glyma.02G038700	41.7067	49.1559	16.3797	-0.979506	9.38716e-06	0.25083	0.589039		151.737	121.316	37.5768	-0.82544	2.78405e-07	-0.417021	0.0861313
Glyma.02G038800	26.9758	24.639	27.1542	0.751309	9.97307e-10	-0.106901	0.748308		8.76139	9.22498	12.5919	1.30502	1.2771e-12	-0.0179828	0.99435
Glyma.02G039000	1.74701	2.8419	556.819	8.19974	7.02175e-246	0.752737	0.1955		1.73715	1.83076	197.664	7.60653	7.18403e-175	0.00159977	1
Glyma.02G039100	12.6985	11.742	33.9538	2.14379	5.14544e-25	-0.091943	0.904309		5.30169	6.71491	14.4425	1.97704	5.55014e-23	0.23616	0.705988
Glyma.02G039200	0.305631	1.1352	0.506724	-0.509398	0.721188	1.9329	0.568568		0.0588892	0.14618	0	-0.796395	0.862189	0.798173	0.970849
Glyma.02G039300	9.25326	16.2059	0	-7.65032	9.89298e-10	0.835815	0.181936		6.86611	6.58277	0	-6.98044	1.91325e-08	-0.155282	0.892693
Glyma.02G039400	17.3058	16.9179	18.5281	0.741307	5.07307e-05	-0.0141559	0.992755		6.33685	6.60841	8.46661	1.22686	2.34388e-07	-0.037202	0.980637
Glyma.02G039700	15.9793	21.5521	22.4958	0.678117	0.00918671	0.452411	0.384051		168.536	225.562	332.112	1.41883	7.41155e-10	0.329279	0.550393
Glyma.02G039900	1.08408	0.691857	4.9187	3.41441	6.25112e-24	-0.577786	0.459772		0.352102	0.644572	3.41196	3.21364	4.99779e-11	0.824861	0.617125
Glyma.02G040000	28.1796	29.0408	3.77917	-2.33142	2.26688e-17	0.0668659	0.928248		30.4201	38.3397	2.57692	-3.00503	2.50472e-25	0.238205	0.601331
Glyma.02G040100	55.2836	64.6862	0.774414	-5.77344	2.28721e-29	0.24179	0.518345		73.1323	93.1476	0.524343	-6.54311	5.87258e-48	0.256084	0.473357
Glyma.02G040500	27.9061	23.0546	3.53549	-2.10634	8.24022e-18	-0.251342	0.556115		21.8729	23.9694	6.00253	-1.11637	0.00180475	0.0320545	0.993368
Glyma.02G040600	35.931	47.2677	17.0072	-0.833607	0.00665199	0.410666	0.515292		39.7782	37.4195	22.3644	0.118184	0.434019	-0.188508	0.53747
Glyma.02G040700	7.10722	9.17895	4.31514	-0.450674	0.290376	0.379651	0.705765		18.3099	19.8565	11.948	0.118512	0.676227	0.0256586	0.992848
Glyma.02G040800	0.342933	1.1202	6.90788	3.35004	0.000595153	1.47957	0.664758		0.229763	0.235178	1.97338	3.80831	0.00641124	0.0207182	1
Glyma.02G040900	28.4197	30.6449	20.6864	0.0475137	0.716708	0.129864	0.647866		8.59259	8.21715	5.11431	0.166427	0.368055	-0.158133	0.741379
Glyma.02G041200	13.743	11.1278	2.62139	-1.44728	0.00674823	-0.286754	0.832311		13.4904	12.6893	0.978691	-2.78422	5.15665e-10	-0.17809	0.841796
Glyma.02G041400	45.8481	39.8142	25.957	-0.0116589	0.896225	-0.179985	0.157641		17.9134	19.1306	9.09536	-0.219154	0.186656	0.00179523	1
Glyma.02G041500	64.0494	64.6061	4.28119	-3.29581	2.439e-110	0.0299607	0.947542		83.5601	86.0767	3.76333	-3.67774	4.10061e-92	-0.0506873	0.907242
Glyma.02G041600	31.1058	30.6858	10.9192	-0.875825	0.000139	0.00268926	1		9.12774	8.57391	4.62542	-0.0432979	0.876513	-0.180802	0.797561
Glyma.02G041700	15.8831	15.0425	16.177	0.710141	3.49471e-06	-0.0537133	0.920812		18.0639	20.353	9.86523	-0.177385	0.259028	0.0736851	0.890666
Glyma.02G041800	3.42746	3.2523	6.2574	1.57056	4.38504e-09	-0.0650057	0.954569		0.807184	0.786053	1.40361	1.6787	3.27169e-06	-0.13674	0.932863
Glyma.02G041900	5.7152	6.36829	0.842949	-2.32155	7.84634e-06	0.184236	0.8872		12.7931	10.9978	0.75588	-3.01212	3.67955e-19	-0.315133	0.396438
Glyma.02G042000	2.55441	6.38158	0.205139	-4.36562	1.18253e-13	1.34189	0.0012787		0.338334	1.37873	0.0267271	-4.47278	0.00101353	1.96031	0.0832202
Glyma.02G042100	12.4118	13.2483	9.17122	0.0754223	0.687705	0.126007	0.798004		12.6534	12.2957	3.22155	-1.04422	3.40509e-06	-0.144682	0.818114
Glyma.02G042200	9.8064	9.76085	112.126	4.13896	1.57719e-149	0.0186268	0.987307		6.75278	6.52838	21.65	2.5959	1.24275e-40	-0.144869	0.848292
Glyma.02G042400	0.675733	0.281596	9.09735	5.59952	2.60591e-18	-1.17982	0.412804		0.218341	0.50062	1.92909	2.78538	2.98733e-06	1.21217	0.50458
Glyma.02G042700	0.628683	1.26684	6.45689	2.99708	0.000481261	1.10141	0.68837		0.0754853	0.223683	2.95645	4.62488	2.59375e-06	1.12701	0.813535
Glyma.02G042800	0.850963	0.746345	2.09611	2.12161	0.0832452	-0.161547	0.981418		0.351539	0.704691	0.982336	1.3101	0.094619	0.996583	0.672969
Glyma.02G043200	25.3683	24.9949	0.0658823	-7.92055	5.08354e-14	0.000780209	1		29.9681	32.3561	0.487186	-5.20373	3.59706e-34	0.0189065	0.985141
Glyma.02G043400	19.9868	17.7263	17.1194	0.556277	4.23462e-05	-0.150414	0.642326		15.6084	16.0623	10.6062	0.262761	0.131092	-0.0460393	0.952878
Glyma.02G043500	5.04802	6.34395	20.6408	2.29752	2.22713e-20	0.349851	0.59048		3.25411	4.09772	7.77068	1.78651	3.07817e-14	0.234709	0.767761
Glyma.02G043600	0	0	0	NA	NA	NA	NA		0.743141	0.283304	4.45001	4.76838	1.68466e-06	-1.38307	0.624223
Glyma.02G043900	10.2834	6.89532	0.709119	-2.69379	5.3882e-07	-0.538735	0.475837		2.68292	2.42016	0.0621394	-4.43814	6.88663e-05	-0.253611	0.8507
Glyma.02G044000	116.272	102.141	38.9518	-0.783014	1.00206e-13	-0.16333	0.405616		87.7085	87.4773	25.6142	-0.902951	4.1107e-15	-0.0993326	0.756885
Glyma.02G044300	2.00919	3.09731	3.39603	0.714537	0.0895486	0.669105	0.463786		1.35631	1.69051	1.0878	0.227798	0.70164	0.249661	0.900948
Glyma.02G044500	0.428771	1.776	7.55519	2.63885	0.0011469	2.08819	0.413144		1.14748	1.20838	2.44806	1.87722	0.00579837	-0.0693577	0.993836
Glyma.02G044600	0.407679	0.833787	4.45166	3.03101	1.28542e-07	1.01804	0.537809		0.0695426	0.0575414	1.2167	5.10937	2.32175e-05	-0.495968	0.938692
Glyma.02G044700	30.9834	29.9241	32.177	0.715872	1.1282e-09	-0.0265527	0.955362		27.3091	31.9984	24.8733	0.499037	6.82357e-06	0.136519	0.622524
Glyma.02G044800	12.3289	11.5983	13.6204	0.854362	8.12009e-05	-0.0633327	0.937729		4.9147	4.68329	4.72298	0.863351	1.21501e-05	-0.149433	0.816576
Glyma.02G045000	11.5723	11.5813	0.572009	-3.72053	1.43291e-24	0.0197579	0.988905		6.37021	7.36541	0.258667	-3.92048	7.23357e-13	0.111189	0.914484
Glyma.02G045100	5.69384	5.79556	6.36211	0.755298	0.00113551	0.0535509	0.953303		4.12964	4.18366	4.15467	0.859405	2.27928e-05	-0.0745372	0.929134
Glyma.02G045200	36.9546	32.188	22.9666	0.119566	0.37234	-0.180968	0.484731		25.2328	28.2453	13.72	-0.175714	0.171513	0.065041	0.885187
Glyma.02G045300	12.4798	17.9224	1.72982	-2.78574	2.15375e-14	0.534601	0.318119		13.1018	16.7801	2.58993	-1.80098	1.69011e-09	0.268202	0.635027
Glyma.02G045400	34.3025	35.9274	11.7747	-1.00289	1.75002e-13	0.0849343	0.825368		15.6486	16.0112	3.80061	-1.21257	1.17809e-10	-0.0697086	0.9134
[truncated: 36,841 more rows]

## Sheet: Table S3
Table S3. List of intergenic noncoding transcripts detected by CB-RNA and polyA RNA.
stat, end, blockSizes and blockStarts have the same meaning as defined by format bed12.
transcript	strand	chromosome	start	end	blockSizes	blockStarts	TPM_CB_10D_apex	TPM_CB_15D_apex	TPM_CB_15D_leaf	TPM_polyA_10D_apex	TPM_polyA_15D_apex	TPM_polyA_15D_leaf
TU1	-	Chr01	0	912	355,295,	0,617,	2.05257	3.24426	1.84717	0	0.170569	0
TU551	-	Chr01	4915	12956	2251,3468,	0,4573,	7.55201	3.88767	3.79957	0.147741	0.157734	0.074086
TU534	-	Chr01	7913	12956	830,1774,	0,3269,	0.893918	12.7033	1.01031	0	0	0
TU2	+	Chr01	80529	81681	64,421,	0,731,	0	2.11531	0.487314	0	0	0
TU25	-	Chr01	382621	383519	549,166,	0,732,	1.33141	0.319556	0.320875	0	0	0
TU27	-	Chr01	382621	383317	696,	0,	0.678542	0.519648	2.02891	0.031172	0.219655	0.30403
TU28	-	Chr01	382621	383519	60,185,127,166,	0,139,413,732,	0	1.01608	0	0	0	0
TU87	+	Chr01	491673	492077	404,	0,	6.3476	12.0911	0	0.97309	0.592644	0
TU89	+	Chr01	493813	494884	592,453,	0,618,	1.11276	1.06814	0.57024	0	0	0
TU105	+	Chr01	497084	500372	835,192,1105,	0,1605,2183,	0.95365	1.43512	0.485543	0.103006	0.179286	0.046398
TU90	+	Chr01	500836	502136	1300,	0,	1.04298	2.5517	0.229193	0.167559	0.249779	0.197495
TU123	+	Chr01	661373	662675	1302,	0,	1.88377	3.37116	0.852277	0.538785	1.60263	0.461015
TU240	+	Chr01	1179453	1179773	320,	0,	2.19649	1.96102	3.59101	0.271198	0	0
TU390	-	Chr01	1669853	1670191	338,	0,	2.3842	1.58659	0.801698	0	0	0
TU426	+	Chr01	1935209	1935865	656,	0,	0.746218	0.437536	2.05062	0.09525	0	0.00732
TU585	-	Chr01	2486906	2487783	877,	0,	2.34513	3.98652	8.1528	0.632321	0.243474	1.4238
TU659	-	Chr01	3029248	3032101	2853,	0,	0.160088	0.440079	2.85049	0.051914	0	0.202984
TU658	-	Chr01	3034077	3034807	730,	0,	2.92838	1.90139	33.6217	0.168415	0.069231	2.08215
TU778	+	Chr01	3557930	3559404	1474,	0,	3.84894	2.89557	13.8694	0.545192	0.764812	3.70559
TU844	-	Chr01	3896452	3897411	959,	0,	1.67581	1.59726	0.287177	2.8228	4.72122	1.7552
TU996	-	Chr01	4803599	4804469	870,	0,	7.29448	2.29924	0.414669	0.902081	0.144138	0.110021
TU1002	+	Chr01	4830032	4830684	652,	0,	2.45992	1.49148	8.63568	0.323441	0.093985	1.30015
TU1023	-	Chr01	4949327	4951603	2099,82,	0,2194,	1.15357	1.78821	4.10648	0.316468	0.728046	1.24837
TU1020	-	Chr01	4962755	4964270	276,73,105,168,534,	0,374,547,725,981,	1.14214	0.201179	0	0	0.130063	0
TU1026	-	Chr01	5070643	5071009	366,	0,	4.71904	4.41843	6.30026	0.690789	0.764642	0.793324
TU1195	+	Chr01	6675676	6677972	113,190,	0,2106,	0	0	1.09762	0	0	0.335977
TU1213	+	Chr01	6768121	6783251	9751,5343,	0,9787,	2.59974	3.41549	3.7316	0.06932	0.083456	0.029247
TU1203	-	Chr01	6894854	6895074	220,	0,	0.268689	0	0.538068	1.86979	4.21971	2.71964
TU1253	+	Chr01	7171785	7172138	232,87,	0,266,	0	0	3.78045	0	0.158444	0
TU1300	-	Chr01	7517324	7520162	153,247,	0,2591,	0.187033	0.116527	0	0.443318	1.03842	0
TU1318	-	Chr01	7519045	7519756	711,	0,	0.922321	2.34002	0	0.241268	0.380286	0
TU1345	+	Chr01	7958906	7960968	2062,	0,	0	0	2.65072	0	0	0.095324
TU1349	-	Chr01	8035275	8035584	309,	0,	0.579878	0.87013	2.91357	0	0.053156	0
TU1357	-	Chr01	8043445	8043843	398,	0,	1.30653	3.81909	8.54438	0	0.471421	0
TU1414	+	Chr01	8248074	8285844	305,122,36115,	0,1042,1655,	4.63029	7.41067	0	0.002922	0.003964	0
TU1416	+	Chr01	8248074	8285844	125,97,122,36115,	0,208,1042,1655,	1.77917	8.42648	0	0.00317	0.003176	0
TU1417	+	Chr01	8248074	8285844	305,122,36132,	0,1042,1638,	3.31804	7.20252	0.038613	0	0.001939	0.001769
TU1418	+	Chr01	8248074	8285844	125,97,122,149,35723,	0,208,1042,1655,2047,	1.28929	1.0471	0	0.473299	0.911522	0
TU1377	+	Chr01	8286532	8302536	1704,9272,	0,6732,	1.36816	2.72338	0.010308	0	0.09727	0
TU1428	+	Chr01	9270417	9272185	1768,	0,	0.131647	0.292496	1.99792	0	0	0.103933
TU1443	-	Chr01	9601926	9602286	360,	0,	0.357903	0.809554	2.087	0	0	0
TU1444	-	Chr01	9603649	9604113	464,	0,	0.334414	0.631275	2.39325	0	0	0
TU1618	+	Chr01	10111179	10114905	2053,1580,	0,2146,	6.1678	6.79703	0.413054	0.846178	0.731203	0.244308
TU1620	+	Chr01	10111179	10114905	590,1381,1577,	0,672,2149,	1.21826	2.13092	0.821613	0.65503	1.14595	0.037756
TU1626	-	Chr01	10115462	10115861	145,176,	0,223,	0.481952	0.475354	1.25808	0	0	0
TU1486	+	Chr01	10940622	10942107	1485,	0,	0.230127	0.335683	2.36674	0	0.034246	0.324225
TU1569	+	Chr01	10965916	10966449	257,192,	0,341,	0.66584	2.22537	0	0.009071	0.000109	0
TU1493	+	Chr01	11151517	11151823	306,	0,	1.29035	2.49007	0	0.300622	0	0
TU1521	+	Chr01	11679549	11679976	427,	0,	0.529946	2.23603	2.04901	0	0	0.156691
TU1522	-	Chr01	11698444	11700409	1965,	0,	0.077556	0.433211	3.40611	0	0	0.073149
TU1547	+	Chr01	11742754	11748601	4554,591,534,	0,4641,5313,	2.1151	0.949216	0	0.117223	0.435785	0.040797
TU1549	+	Chr01	11742754	11748601	3788,1338,534,	0,3894,5313,	0.492001	1.07561	0.367779	0	0	0.048261
TU1533	-	Chr01	11790461	11792423	1962,	0,	0.419913	0.157545	1.98958	0	0	0.045523
TU1532	-	Chr01	11970948	11971469	521,	0,	0.207416	0.678984	3.73501	0	0	0
TU1534	-	Chr01	12188389	12188850	461,	0,	0.601054	1.48788	2.97304	0	0	0
TU1551	-	Chr01	12657080	12694251	12,214,	0,36957,	0	0	1.4021	0	0	0
TU1553	+	Chr01	12760017	12760400	383,	0,	0	0	4.60456	0	0	0.156303
TU1559	-	Chr01	12891107	12891670	563,	0,	3.53945	3.6811	2.77697	0.644324	0.507745	0.375284
TU1570	-	Chr01	13035281	13040773	765,103,2189,	0,2103,3303,	1.66732	2.0725	0	0.193609	0.164908	0
TU1577	-	Chr01	13143278	13143673	395,	0,	2.04249	5.03184	7.43093	0.37423	0	0.121568
TU1962	+	Chr01	13464042	13465231	528,89,338,	0,640,851,	4.36233	5.3187	6.04769	0.065643	2.80415	0.927103
TU1615	-	Chr01	13601098	13691935	69,487,	0,90350,	0.346358	0.307973	1.54899	0	0	0.063335
TU1627	-	Chr01	13602246	13692775	36,266,	0,90263,	0	0	1.11858	0	0.112959	0
TU1595	-	Chr01	13891548	13892106	558,	0,	0.536296	2.41539	1.44675	0	0.156802	0
TU1642	+	Chr01	14515981	14535640	248,81,	0,19578,	0.850035	0.904253	1.74453	0	0	0
TU1644	+	Chr01	14515981	14535640	416,57,	0,19602,	1.21889	0.244437	2.29112	0	0	0
TU1925	-	Chr01	14701367	14701905	538,	0,	2.92709	2.63376	3.28919	0	0	0
TU1624	-	Chr01	14972238	14975301	296,393,	0,2670,	0.413551	1.1002	1.49776	0	0.099024	0
TU1623	-	Chr01	15027353	15027936	583,	0,	0	0	2.6161	0	0	0.198776
TU1625	-	Chr01	15066965	15067258	293,	0,	0	0	3.21696	0	0	0
TU1632	+	Chr01	15522072	15529036	4405,2020,	0,4944,	0.02681	0	2.69719	0	0	0.110911
TU1633	+	Chr01	15806288	15806903	615,	0,	0.742651	2.06068	2.92909	0.166511	0.134565	0.014054
TU1631	-	Chr01	16212622	16213062	440,	0,	0	0	2.1907	0	0	0
TU1643	-	Chr01	16921250	16923353	2103,	0,	1.0332	1.56034	27.6421	0.0641	0	1.15919
TU1645	+	Chr01	16967811	16968225	414,	0,	0.5187	2.54089	1.32461	0	0	0.115215
TU1652	-	Chr01	17110027	17110843	816,	0,	2.24566	2.47183	5.41535	0.073737	0	0.093371
TU1654	+	Chr01	17130306	17130937	631,	0,	5.12456	8.04617	8.83566	0	0.125146	0
TU1649	+	Chr01	17297886	17298099	213,	0,	0	0	2.36667	0	0	0
TU1661	+	Chr01	17501123	17502418	1295,	0,	2.73342	3.20753	0.426576	0.055398	0.409531	0.074161
TU1660	-	Chr01	17527805	17529625	1820,	0,	0	0	2.05212	0	0.028289	0.050658
TU1664	-	Chr01	18580041	18580420	379,	0,	0.305843	0	3.15522	0	0	0
TU1675	-	Chr01	18887599	18887855	256,	0,	0.977739	1.7479	2.73981	0	0	0
TU1687	+	Chr01	19168613	19168914	301,	0,	1.3256	2.22173	3.39097	0.48245	0	0
TU1688	-	Chr01	19193896	19196996	180,152,	0,2948,	0.443727	0.830539	1.0078	0	0	0
TU1699	+	Chr01	19455184	19455568	384,	0,	1.6476	1.47958	3.84706	0	0	0
TU1730	-	Chr01	19869907	19886321	280,84,	0,16330,	0	0	1.36055	0	0	0.191725
TU1723	-	Chr01	19909478	19911166	1688,	0,	0.073868	0.053773	2.01437	0	0	0.043051
TU1732	-	Chr01	19914409	19921166	6757,	0,	0.182893	0.043277	3.94311	0.018152	0.013416	0.10712
TU1734	-	Chr01	19933188	19943890	287,10073,	0,629,	0.034502	0.046791	4.26258	0	0.006891	0.14483
TU1738	+	Chr01	19945409	19947260	1851,	0,	0.371245	0.824093	14.1719	0.058449	0.198633	3.28499
TU1744	-	Chr01	19975212	19977133	73,568,	0,1353,	0.114552	0	2.78642	0	0	0.6897
TU1755	+	Chr01	20253371	20255115	1744,	0,	2.81588	4.17887	2.45022	0.194068	0.414396	0.035978
TU1757	+	Chr01	20390758	20393369	1145,423,	0,2188,	2.63509	1.67624	0	1.24068	0.748777	0
TU1754	-	Chr01	20558652	20558959	307,	0,	1.41401	3.72054	0.887897	0	0	0
TU1762	+	Chr01	20899951	20900203	252,	0,	1.09588	0.816629	4.74375	0	0	0
TU1759	+	Chr01	20965128	20971156	176,74,	0,5954,	0	0	1.89078	0	0	0
TU1765	+	Chr01	21029297	21029910	613,	0,	0.156699	0.207301	2.06573	0	0	0.179648
TU1787	+	Chr01	22430073	22430642	569,	0,	1.12896	1.99963	1.941	0	0	0
TU1803	+	Chr01	23370078	23371463	1385,	0,	2.76519	3.10041	0.630263	2.50304	3.33885	0.816155
TU1804	+	Chr01	23617326	23624769	368,25,	0,7418,	0	1.00001	0.12704	0	0	0
TU1811	+	Chr01	23617844	23625525	178,403,	0,7278,	4.96545	11.8209	13.4491	0	0.245736	0
TU1825	+	Chr01	23621500	23621858	358,	0,	0.277344	0.505714	2.00193	0.718346	1.70022	0.738621
TU1831	+	Chr01	23880674	23881197	523,	0,	0.467108	0.826487	2.13405	0.084073	0	0
TU1840	-	Chr01	24045987	24046821	834,	0,	0.320609	0.092362	2.08463	0.090183	0	0.204591
TU1932	-	Chr01	25745191	25746176	985,	0,	2.78258	2.62156	1.68535	0.440818	0.846911	0.221002
TU1938	+	Chr01	26180605	26181626	1021,	0,	0.067847	0.237871	0.187318	1.02026	1.50849	0.48474
TU1940	+	Chr01	26549824	26550560	736,	0,	1.98842	2.86517	1.29051	0.188659	0.128751	0
TU2007	+	Chr01	27083480	27085285	164,126,655,	0,339,1150,	1.86777	2.60688	0	1.22415	3.35255	0
TU2043	-	Chr01	27253312	27263203	6164,559,792,	0,8447,9099,	2.706	1.2679	0	0.283945	0	0
TU2044	-	Chr01	27253312	27263203	6164,231,792,	0,8447,9099,	0.694293	1.51723	0.564948	0.30479	0.611036	0
TU2045	-	Chr01	27253312	27263203	9891,	0,	7.32516	8.27792	5.73247	0.570516	0.568026	0.565914
TU2021	-	Chr01	27322229	27324399	2170,	0,	0	0.087501	10.2641	0	0	0.611933
TU2048	+	Chr01	27991875	27994176	267,1411,	0,890,	1.31002	2.1915	2.93795	0	0.056849	0
TU2059	+	Chr01	28151259	28153204	403,1486,	0,459,	0.859324	1.77737	3.90209	0	0.152667	0.050672
TU2077	+	Chr01	28153653	28159083	5430,	0,	0.665585	1.72311	2.93427	0.024932	0	0.111426
TU2111	-	Chr01	28162263	28171457	3413,5271,340,	0,3498,8854,	0.998131	0.196517	4.82286	0.060843	0.256223	0.253045
TU2088	-	Chr01	28423670	28423958	288,	0,	0.339944	1.20445	2.18933	0	0	0
TU2320	-	Chr01	28569447	28578205	1504,57,129,6770,	0,1594,1777,1988,	19.054	18.9105	7.05409	0.372464	0.365299	0.133678
TU2313	-	Chr01	28578290	28603896	8522,190,110,96,63,761,	0,12862,24293,24506,24695,24845,	3.85135	4.53856	2.11679	0.34479	0.37661	0.029236
TU2173	-	Chr01	29005701	29006000	299,	0,	4.07907	3.80532	0.785073	0	0.575746	0
TU2106	+	Chr01	29096599	29096827	228,	0,	0	0	2.51824	0	0	0
TU2113	+	Chr01	29097527	29097837	310,	0,	0	0	9.67755	0	0	0
TU2145	-	Chr01	29583869	29584129	260,	0,	0	0.771813	2.20985	0	0	0.157602
TU2155	+	Chr01	29841820	29844216	53,636,62,104,	0,1387,2119,2292,	0	0	1.44196	0	0	0.326119
TU2219	+	Chr01	30631216	30725664	526,387,203,	0,1672,94245,	0.68862	0.475576	1.59503	0	0	0
TU2220	+	Chr01	30632791	30726539	1512,254,	0,93494,	0	0.051485	2.21861	0	0.047756	0
TU2221	+	Chr01	30632791	30726539	1456,105,	0,93643,	0	0	2.07281	0	0	0
TU2222	+	Chr01	30632791	30725755	925,63,	0,92901,	0	0	1.74594	0	0	0
TU2223	+	Chr01	30632791	30726539	1357,254,	0,93494,	0.27866	2.32869	0.463509	0	0	0
TU2224	+	Chr01	30632791	30726539	1158,404,	0,93344,	1.51073	0.257803	0.543111	0	0	0
TU2231	+	Chr01	30634578	30727639	828,119,	0,92942,	0	0	1.68091	0	0	0
TU2246	+	Chr01	30636637	30720997	287,45,	0,84315,	0	2.97358	1.95244	0	0	0
TU2178	+	Chr01	31219998	31220912	94,367,	0,547,	0.179314	1.07493	0	0	0	0
TU2226	-	Chr01	31518446	31523957	4979,297,	0,5214,	30.4256	25.3883	12.3521	2.28163	3.04416	0.360992
TU2227	-	Chr01	31518446	31523957	4979,212,	0,5299,	8.80321	13.8613	0	1.85352	1.04645	0.031527
TU2228	-	Chr01	31518446	31523957	4612,61,297,	0,4918,5214,	0	1.47829	0	0.217153	0.564081	0.189655
TU2199	+	Chr01	31569955	31571696	152,293,	0,1448,	0.728518	1.2051	0	0.669564	0	0
TU2191	-	Chr01	31654383	31654628	245,	0,	3.75103	2.81366	3.74369	0.644676	1.11521	3.70043
TU2198	+	Chr01	32161881	32162872	218,150,	0,841,	0	0.915948	1.7123	0	0	0
TU2213	-	Chr01	32804563	32805075	512,	0,	2.35325	1.03782	0.727418	0	0.185079	0
TU2516	+	Chr01	33007632	33017008	9376,	0,	2.19281	3.11192	0.055139	0.064976	0.091061	0
TU2218	-	Chr01	33199067	33199362	295,	0,	1.3823	0.360911	2.01045	0	0	0
TU2259	-	Chr01	33524065	33526336	2271,	0,	0.465267	0.369144	2.10478	0.115915	0.050211	0.107088
TU2263	+	Chr01	34135025	34138852	187,64,	0,3763,	0	1.28426	0.821313	0.11525	0	0
TU2262	-	Chr01	34237290	34237502	212,	0,	0.413886	0.34715	2.11384	0	0	0
TU2448	-	Chr01	34241451	34242265	814,	0,	0.867454	2.52702	2.67624	0	0	0.080622
TU2449	-	Chr01	34303416	34307170	3754,	0,	2.73715	2.23264	2.64867	0.023118	0.08877	0.021063
TU2436	-	Chr01	34309222	34320203	3180,1218,	0,9763,	2.65396	2.64221	0.578865	0.242272	0.31989	0.120409
TU2264	+	Chr01	34330491	34330937	446,	0,	0	0	2.00506	0.1161	0	0
TU2316	-	Chr01	34995971	35032730	14908,8460,686,12601,	0,14948,23446,24158,	7.28338	11.7234	6.54019	0.092351	0.152889	0.042105
TU2564	-	Chr01	35032847	35042946	1249,633,	0,9466,	5.8879	8.4485	6.29482	0	0.059285	0
TU2565	-	Chr01	35034599	35042946	8347,	0,	5.27883	7.38884	5.90912	0.161019	0.161101	0.083801
TU2567	-	Chr01	35034599	35056390	2021,11478,	0,10313,	0	3.72818	0	0	0	0
TU2560	-	Chr01	35043716	35064178	12444,527,	0,19935,	0.054613	1.97897	1.76721	0	0	0
TU2562	-	Chr01	35043716	35056390	12674,	0,	22.0837	18.6747	20.7023	0.210442	0.2922	0.04721
TU2577	-	Chr01	35057800	35058508	708,	0,	4.06302	8.36165	0	0.099286	0.240916	0.330076
TU2585	-	Chr01	35058741	35059833	1092,	0,	10.4186	15.0341	11.9154	0.118148	0.261777	0.087947
TU2593	-	Chr01	35060331	35062976	2645,	0,	6.14408	6.93201	4.92175	0.032591	0.035348	0.034736
TU2318	-	Chr01	35678283	35678526	243,	0,	2.9172	4.05635	12.1122	3.88561	5.58683	22.7094
TU2339	-	Chr01	35698570	35699144	574,	0,	0.745011	3.72766	2.01669	0	0	0.167315
TU2344	-	Chr01	35935439	35939585	1711,2078,	0,2068,	0.26424	0.026157	1.76378	0	0	0.035401
TU2343	-	Chr01	35939692	35941511	104,436,	0,1383,	0	0	1.77011	0	0	0.152358
TU2354	-	Chr01	36240138	36240455	317,	0,	5.55483	5.51775	0.538541	2.4	2.18517	0.476658
TU2359	-	Chr01	36255422	36263112	5584,2056,	0,5634,	0.23151	0.097357	1.53903	0	0.019845	0.020909
TU2357	+	Chr01	36384786	36385147	361,	0,	0.278877	0.864394	2.97348	0	0	0
TU2361	+	Chr01	36424016	36424826	810,	0,	0.511982	1.11999	1.94955	0.094997	0.144675	0
TU2406	+	Chr01	36645785	36669472	1478,22126,	0,1561,	4.95833	6.26669	0.255836	0.236423	0.356085	0.027098
TU2407	+	Chr01	36645785	36669472	1478,65,17280,	0,1561,6407,	1.38586	2.04215	0.031409	0	0	0
TU2408	+	Chr01	36645785	36669472	1478,65,17271,	0,1561,6416,	0.831182	1.63026	0	0	0.06096	0
TU2369	+	Chr01	36715071	36715451	380,	0,	2.16929	2.82763	1.48551	0	0	0
TU2397	+	Chr01	37205927	37206979	1052,	0,	0.408693	0.435605	3.30605	0	0	0.07212
TU2418	-	Chr01	37664978	37666766	112,216,	0,1572,	0	0	2.20836	0	0	0
TU2427	+	Chr01	37790402	37790699	297,	0,	2.47076	3.25275	1.13877	0	0	0
TU2493	+	Chr01	37820422	37821016	594,	0,	1.98019	2.52753	0.462286	0.538621	1.13532	0
TU2437	+	Chr01	37852694	37852963	269,	0,	0	0	3.45309	0	0	0
TU2489	-	Chr01	38609180	38610631	1451,	0,	2.52754	4.32395	2.70813	2.357	2.82823	1.41282
TU2485	-	Chr01	38738200	38738507	307,	0,	3.53202	4.48767	0	0	0	0.244007
TU2497	+	Chr01	39089834	39090241	407,	0,	1.1358	0.71004	6.61827	0.177689	0	0
TU2498	+	Chr01	39287665	39288057	392,	0,	0.741017	1.343	0.54438	1.41761	1.55114	0
TU2511	-	Chr01	39366039	39368326	305,188,525,	0,1451,1762,	0	0	2.16743	0	0	0
TU2515	-	Chr01	39587404	39598773	10081,336,	0,11033,	2.3216	3.30189	0.475108	0.047153	0.142697	0
TU2525	-	Chr01	39982727	39984813	2086,	0,	0.545273	0.891194	9.30444	0.0796	0	0.644094
TU2609	-	Chr01	40892890	40894346	1456,	0,	2.21358	3.32967	2.48412	0.039537	0.281374	0.399941
TU2578	-	Chr01	41229668	41231391	1723,	0,	2.91158	4.08999	1.10135	0.040294	0	0
TU2592	+	Chr01	41457908	41459799	1891,	0,	0	0	3.32265	0	0	0.03335
TU2611	+	Chr01	41866940	41869010	666,65,327,	0,751,1743,	0.347012	0.2379	1.33464	0	0	0.88111
TU2604	-	Chr01	41938646	41938865	219,	0,	0	0	2.71733	0.022455	0	0.26312
TU2622	+	Chr01	42021603	42022746	185,478,	0,665,	2.06456	1.06342	19.4255	3.11661	4.05197	33.2379
TU2628	+	Chr01	42572592	42578712	130,119,128,5373,	0,273,522,747,	0.046181	0	5.19687	0	0	0.158895
TU2627	+	Chr01	42578944	42592284	13340,	0,	0.00997	0.004781	2.67849	0	0	0.05853
TU2662	+	Chr01	43181265	43183117	352,1407,	0,445,	6.14005	9.57373	1.36928	1.15941	2.62517	0.770565
TU2702	+	Chr01	43240991	43254678	199,11035,	0,2652,	1.3247	0	1.61976	0	0	0
TU2710	+	Chr01	43240991	43254678	528,11035,	0,2652,	0	1.48891	1.33507	0.031272	0.018221	0.021179
TU2691	+	Chr01	43274925	43276520	1595,	0,	0.363078	1.48576	2.01772	0.038087	0.03228	0
TU2721	+	Chr01	43277149	43278623	573,858,	0,616,	1.54163	1.11225	1.76923	0.053772	0	0.232882
TU2728	+	Chr01	43279308	43281323	436,391,	0,1624,	0.265806	0.185102	1.21132	0.169649	0.167292	0
TU2737	+	Chr01	43281457	43283059	107,127,507,	0,243,1095,	0.261304	1.09015	0.423314	0	0	0
TU2741	+	Chr01	43281457	43282214	107,514,	0,243,	0.058543	0.133978	1.02179	0.128102	0.231942	0
TU2689	-	Chr01	43465178	43466778	337,125,	0,1475,	0	0.253815	1.35694	0	0	0.238364
TU2693	+	Chr01	43485444	43485880	298,48,	0,388,	1.23327	0	0	0	0	0
TU2694	-	Chr01	43867753	43868742	989,	0,	1.30558	2.52066	0.13964	0.066104	0.022996	0
TU2699	-	Chr01	43868942	43869518	576,	0,	2.40847	2.36972	0	0	0	0
TU2719	+	Chr01	43895728	43896025	297,	0,	3.23112	1.61068	1.67019	0	0.053176	0.815951
TU2720	+	Chr01	43940099	43940653	554,	0,	2.98009	2.36552	2.04516	1.93148	1.13291	1.43769
TU2750	-	Chr01	43979788	43984474	782,264,218,3161,	0,862,1219,1525,	2.00917	2.73197	0	0	0	0
TU2739	+	Chr01	44270089	44270389	300,	0,	0.912845	1.63056	2.1286	0	0.212684	0
TU2767	-	Chr01	44538641	44540694	98,129,265,	0,1351,1788,	0.694593	1.3682	0	0	0.367871	0
TU2768	+	Chr01	44544991	44546437	431,552,265,	0,526,1181,	1.17784	1.88078	0.089367	0.133745	0	0
TU2770	-	Chr01	44626639	44629670	3031,	0,	2.61377	3.5146	3.23145	0.071675	0.241669	0.049324
TU2779	+	Chr01	44977553	44977950	397,	0,	1.18419	1.0579	3.8651	0	0	0
TU2786	+	Chr01	45085527	45086413	886,	0,	0.218917	0	8.03181	0	0	0.248949
TU2809	+	Chr01	45267708	45268887	683,109,211,	0,761,968,	0	0	4.66584	0	0	0.711752
TU2815	+	Chr01	45269008	45272449	680,66,264,442,	0,2387,2571,2999,	0	0	2.78384	0	0	1.08002
TU2817	+	Chr01	45269008	45272449	680,66,341,442,	0,2387,2571,2999,	0	0	1.24256	0.169622	0	0.894895
TU2819	+	Chr01	45269008	45272449	680,66,870,	0,2387,2571,	0	0.207064	1.76184	0.053067	0.395031	1.50816
TU2810	+	Chr01	45363551	45364232	211,347,	0,334,	3.14743	2.19996	5.6737	0.500793	0.613056	1.7085
TU2811	+	Chr01	45392265	45393132	867,	0,	0	0.151662	2.49523	0	0	0
TU2820	+	Chr01	45558374	45558662	288,	0,	0	0	3.13581	0	0	0
TU2834	+	Chr01	45595984	45598657	171,100,74,70,	0,374,1451,2603,	0.499645	0.954602	1.56216	0	0	0
TU2860	-	Chr01	46218810	46219137	327,	0,	1.57467	1.36539	3.08688	0.284855	0.075345	0
TU2883	+	Chr01	46766558	46766854	122,92,	0,204,	0	1.1326	0.632176	0	0	0
TU2916	-	Chr01	46918407	46918976	569,	0,	3.08496	4.23553	3.58834	0.045247	0	0
TU2951	-	Chr01	46962878	46969339	54,70,105,168,239,2596,150,58,	0,325,488,665,915,1241,6107,6403,	1.62007	2.87594	0.081112	0	0.402181	0
TU2914	-	Chr01	47379316	47389891	10575,	0,	0.033189	0	3.01682	0	0	0.227798
TU2915	-	Chr01	47390111	47393687	3576,	0,	0	0.041161	2.13579	0	0	0.220044
TU2965	-	Chr01	47396309	47399899	1826,50,249,	0,2973,3341,	0	0.076193	2.85767	0	0	0.139953
TU3058	-	Chr01	47623949	47630081	690,835,207,193,406,133,52,634,	0,1065,2001,2318,3365,4374,5298,5498,	0.406136	0.421572	1.23887	0.102175	0.181006	0.36736
TU2958	+	Chr01	47667826	47669996	532,356,	0,1814,	0.100371	0	1.20428	0.183079	0.247572	1.05231
TU2957	-	Chr01	47701018	47701656	304,184,	0,454,	0	0	1.25989	0	0	0
TU3026	+	Chr01	48407620	48408821	230,358,	0,843,	2.24722	1.77537	0	0.501388	1.85866	0
TU3027	+	Chr01	48407620	48407900	280,	0,	0.230445	1.06773	0	0.989593	0.416316	0
TU3149	-	Chr01	48792068	48792680	169,363,	0,249,	1.10331	0.184378	0	0	0.029172	0
TU3163	+	Chr01	48897747	48904629	671,905,	0,5977,	0	0	4.53547	0	0	0
TU3171	-	Chr01	48902281	48903209	928,	0,	2.96743	3.48523	56.5087	0	0	0.233887
TU3165	+	Chr01	48904952	48910809	5280,296,	0,5561,	0.273889	0.217338	3.6386	0.026199	0	0.155299
TU3189	-	Chr01	49015712	49016711	455,255,	0,744,	2.82418	2.68787	14.2483	0.099983	0	0.983412
TU3265	-	Chr01	49475616	49476423	807,	0,	0.109301	0	3.96492	0	0	0.294614
TU3341	+	Chr01	49620426	49622545	311,1733,	0,386,	3.15072	2.77289	7.3763	2.65459	2.3568	4.10733
TU3343	-	Chr01	49622350	49623298	616,49,	0,899,	0.084534	1.47277	0.278427	0	0	0
TU3644	+	Chr01	50809644	50810079	435,	0,	2.21138	4.42139	0.409115	0	0.332569	0.144242
TU3809	-	Chr01	51501662	51502466	804,	0,	1.87622	3.32298	1.69107	0.471695	0.179587	0.183955
TU3801	+	Chr01	51501717	51503003	30,1141,	0,145,	0.471493	0.317891	1.65428	0	0.27079	0
TU3812	+	Chr01	51565813	51566929	1116,	0,	0.306632	0.655064	9.7264	0.184039	0.211711	1.8657
TU3814	-	Chr01	51611966	51613003	1037,	0,	0.265864	0.072862	3.10771	0	0	0.076559
TU4000	-	Chr01	52333275	52335004	1729,	0,	0	0.117765	3.31703	0	0	0
TU4320	-	Chr01	53487405	53487706	301,	0,	2.17864	2.15653	0.731701	17.4124	18.27	69.503
TU4362	+	Chr01	53549170	53550335	325,375,	0,790,	2.40009	3.03776	19.1666	1.39597	1.68809	4.20283
TU4574	-	Chr01	54121581	54122521	940,	0,	2.11057	1.94917	0.428806	0.156607	0.065853	0
TU4587	-	Chr01	54210025	54211442	567,244,	0,1173,	0.99971	1.44288	0.155394	0.241582	0	0.077368
TU4588	-	Chr01	54210025	54211119	458,554,	0,540,	1.22315	0	0	1.27251	0.927004	0
TU5123	-	Chr01	56026197	56033125	344,1274,	0,5654,	1.03788	1.43174	27.2888	0.000571	0	0.357816
TU5125	-	Chr01	56026197	56027906	275,155,	0,1554,	0.591423	0.114651	0.476069	0.437823	0	1.11488
TU5129	-	Chr01	56026753	56027187	434,	0,	2.03877	0.87388	60.2989	0	0	1.51508
TU5139	-	Chr01	56028022	56033856	136,297,	0,5537,	0.158914	0	1.50547	0	0	0
TU5144	-	Chr01	56028343	56029785	1442,	0,	2.4253	2.44299	102.349	0.038718	0	1.03875
TU5263	+	Chr01	56336385	56337159	380,278,	0,496,	0.590948	0	0.600282	0.478319	0.582292	1.01926
TU5274	-	Chr01	56428122	56428575	453,	0,	2.24788	2.32539	2.68691	0.233721	0.161072	0.171018
TU5298	-	Chr01	56470285	56470512	227,	0,	14.4728	16.5758	3.57938	1.06536	3.24217	0
TU5297	-	Chr01	56547380	56549435	766,97,944,	0,864,1111,	0.685687	1.60768	0.245771	0.252137	0.500285	0
TU5386	+	Chr01	56685486	56687876	563,45,923,96,223,	0,662,908,1954,2167,	0.194805	1.54775	0.913963	0.067523	0	0.166825
TU5391	+	Chr01	56685486	56687876	563,319,631,96,223,	0,662,1200,1954,2167,	1.27197	0.412853	0.222982	0.154732	0.231457	0
TU5411	+	Chr01	56782150	56782745	595,	0,	1.56239	2.11346	3.13582	0.218782	0.794713	0.225435
TU5442	-	Chr02	22627	25932	633,649,391,227,	0,1273,2176,3078,	0.187884	0.176372	8.70393	0	0	1.23266
TU5468	+	Chr02	225826	227135	310,627,	0,682,	0	0.289042	1.21478	0.096323	0.162485	0.099763
TU5488	-	Chr02	303712	304186	474,	0,	2.61205	3.87853	3.05799	0	0.167264	0
TU5660	+	Chr02	783325	785406	293,76,129,81,161,747,	0,399,578,818,1092,1334,	3.37854	2.86011	0	2.70087	2.80367	0
TU5662	+	Chr02	783325	785406	293,76,129,1263,	0,399,578,818,	3.29882	2.69958	0	0.97365	1.92281	0
TU5665	+	Chr02	783325	785406	707,435,747,	0,818,1334,	0.910474	1.60124	0.088243	0.156255	0.4099	0
TU5679	+	Chr02	946750	947611	107,581,	0,280,	0.189289	0	1.60889	0	0.070702	1.32611
TU5719	+	Chr02	1041903	1042781	878,	0,	1.44539	1.26124	0.418686	0.981172	2.7464	0.169544
TU5815	-	Chr02	1044846	1046303	613,715,	0,742,	0.580925	2.22202	1.02378	0.800318	1.47659	0
TU5824	+	Chr02	1364133	1365005	107,683,	0,189,	1.14693	0.536598	0.480105	0.405355	0.666921	0
TU5825	+	Chr02	1369972	1373655	195,1702,	0,1981,	0	0	2.44129	0	0	0.878371
TU5830	-	Chr02	1453746	1454528	449,252,	0,530,	0.534277	1.09466	0	0.551732	0.545222	0
TU5866	+	Chr02	1564803	1565930	1127,	0,	1.1408	2.37353	0.42693	1.18124	1.1054	0.632769
TU5941	-	Chr02	2031370	2031749	379,	0,	0.467903	0.378012	3.22534	0	0	0.247487
TU6009	-	Chr02	2317458	2318047	589,	0,	1.2592	3.57858	0.705467	0.596236	0.673566	0.357088
TU6051	-	Chr02	2417883	2418482	161,366,	0,233,	0.490728	0.705701	2.84901	0.987496	0.234354	1.4992
TU6140	+	Chr02	2526808	2529113	30,722,55,483,	0,126,946,1822,	24.1091	15.6378	5.49807	2.30903	0.769776	1.45026
TU6090	+	Chr02	2539722	2542113	2391,	0,	3.63248	1.97343	5.30567	0.470394	0.369768	0.870011
TU6085	+	Chr02	2543295	2544324	1029,	0,	1.40024	1.48813	2.79302	0	0	0
TU6105	+	Chr02	2677479	2678575	1096,	0,	1.71156	0.793707	0.46766	2.13791	1.34042	2.3738
TU6175	-	Chr02	3063028	3065427	2399,	0,	3.84213	3.76661	3.01851	0.932948	1.24385	2.51166
TU6257	-	Chr02	3532362	3532589	227,	0,	196.119	150.272	23.846	0	0.468932	0.227052
TU6362	-	Chr02	3949712	3950328	616,	0,	1.67181	6.79726	0.141184	0	0.190751	0
TU6413	-	Chr02	4064286	4066115	1829,	0,	8.1121	8.98253	0.15674	1.10537	1.22153	0
TU6596	+	Chr02	4778335	4782825	85,190,1311,	0,1061,3179,	1.23489	1.92358	0.511038	0	0.208322	0.181662
TU6702	+	Chr02	5094793	5095828	333,33,	0,1002,	1.027	2.09859	0	0	0	0
TU6769	-	Chr02	5369234	5369622	388,	0,	0	0.187151	2.57044	0.184154	0.200267	0
TU6788	-	Chr02	5496241	5496735	494,	0,	0.191642	0.376421	0	3.23007	4.94775	0.136735
TU6816	-	Chr02	5616451	5617074	623,	0,	3.47729	2.32719	0.861499	0.419754	0.550614	0.154155
TU6849	+	Chr02	5697612	5699239	259,74,849,	0,362,778,	0.585663	1.81478	0.389692	0	0.439596	0
TU6879	-	Chr02	5889906	5891400	1494,	0,	0.525177	0.691295	4.52656	0.080742	0.022622	0.06814
TU7184	-	Chr02	6991038	6991657	394,113,	0,506,	0.527393	1.96256	0.458227	0.203693	0.631113	0.377588
TU7205	-	Chr02	7058419	7059005	586,	0,	14.0836	15.43	2.31275	1.22474	1.71086	0.153509
TU7236	-	Chr02	7265113	7265331	218,	0,	0	0	0	3.32802	1.76046	0.765078
TU7248	+	Chr02	7365495	7365754	259,	0,	0.879044	0	4.91558	0	0.259768	0.423954
TU7347	+	Chr02	7591599	7603482	277,8530,	0,3353,	40.4858	56.5475	47.1498	0.446868	0.431536	0.37349
TU7366	+	Chr02	7607817	7608616	799,	0,	7.07454	12.4262	4.81702	0.105719	0	0
TU7382	+	Chr02	7608789	7612247	3458,	0,	5.82992	9.34541	8.57528	0.095366	0.051336	0.119423
TU7345	-	Chr02	7806662	7808834	2172,	0,	1.21044	2.33053	0.419319	0.491053	0.866834	0
TU7363	+	Chr02	7873025	7874952	1927,	0,	10.1658	8.10585	1.11952	0.459962	0.684189	0.094859
TU7364	+	Chr02	7875302	7876284	982,	0,	1.71509	2.64955	0.75033	0.194423	0.194603	0
TU7450	-	Chr02	8262725	8263858	247,454,	0,679,	3.46852	4.22537	0.350942	0.079644	0.187899	0
TU7786	+	Chr02	10051282	10052432	1150,	0,	0.394346	0.088315	2.75473	0	0	0
TU7833	+	Chr02	10301091	10301825	734,	0,	3.23456	3.83286	1.96491	0.558456	1.31899	0
TU7864	+	Chr02	10347373	10348583	174,45,497,	0,326,713,	1.63053	4.19167	1.17754	0.448461	0.264694	0
TU7919	+	Chr02	10664331	10668432	1118,839,	0,3262,	0.734601	0.600199	4.27469	0.277157	0.122828	0.913765
TU7964	-	Chr02	10720672	10725911	1750,60,80,122,79,496,	0,1893,3110,3291,4507,4743,	23.1232	21.9573	18.7446	1.26488	1.17733	1.53597
TU7966	-	Chr02	10720672	10725911	180,115,80,106,60,80,122,79,496,	0,801,1012,1644,1893,3110,3291,4507,4743,	4.23667	4.49323	4.77904	1.00637	1.90832	1.27175
TU7968	-	Chr02	10720672	10725911	180,949,60,80,1295,496,	0,801,1893,3110,3291,4743,	11.4834	10.0754	12.7182	0.821861	1.02715	0.670209
TU7970	-	Chr02	10720672	10725911	180,291,106,60,80,122,79,496,	0,801,1644,1893,3110,3291,4507,4743,	1.51228	2.60931	2.25157	0.610635	0.612722	0.109265
TU8054	+	Chr02	11144873	11149517	665,66,80,761,77,159,343,	0,746,939,1374,2241,2967,4301,	52.2631	40.7301	43.1577	19.1781	20.1772	12.8578
TU8103	+	Chr02	11384223	11387915	797,163,735,	0,922,2957,	1.35339	2.0076	16.0362	1.89235	2.64764	3.07479
TU8105	+	Chr02	11384223	11387915	1085,735,	0,2957,	17.6565	18.4457	24.098	2.59205	1.90064	3.38506
TU8078	-	Chr02	11436478	11436958	480,	0,	4.48148	3.41914	2.46866	0	0	0
TU8079	-	Chr02	11441961	11442485	524,	0,	2.0191	2.09083	3.94184	0	0	0.341511
TU8081	-	Chr02	11443690	11443917	227,	0,	0.673388	1.232	2.42291	0.189878	0	0.180513
TU8368	-	Chr02	11458220	11458689	469,	0,	1.61289	2.03265	5.98288	0	0.130658	0
TU8421	-	Chr02	11477894	11478697	803,	0,	2.2964	1.9986	7.20934	0.054037	0.093226	0.0598
TU8427	-	Chr02	11485012	11485830	818,	0,	3.68263	2.45859	4.08444	0.099726	0.282273	0.569422
TU8340	-	Chr02	11512233	11514049	502,524,	0,1292,	0.652166	0.926735	1.40404	0.38179	0.486054	0.371135
TU8444	-	Chr02	11515266	11515889	623,	0,	2.94654	2.53195	7.21772	0.16623	0	0.113561
TU8482	-	Chr02	11530912	11531658	554,130,	0,616,	0.536753	1.26461	3.41534	0.090505	0	0.372548
TU8494	-	Chr02	11532179	11533286	1107,	0,	0.21401	0.542495	3.52734	0	0.139244	0.249278
TU8501	-	Chr02	11534427	11535123	696,	0,	1.686	2.86417	12.1913	0.08562	0	0.10487
TU8541	-	Chr02	11542262	11542987	725,	0,	3.00846	3.14077	4.18686	0	0	0.12187
TU8559	-	Chr02	11544075	11545838	468,463,	0,1300,	1.56932	1.29587	1.408	0.822795	0.855999	0.261965
TU8557	-	Chr02	11545175	11545838	663,	0,	1.65589	2.14464	0.187251	0.069352	0	0.027113
TU8717	-	Chr02	11596849	11597335	486,	0,	1.75982	2.57232	8.19521	0.151186	0	0.144914
TU8090	-	Chr02	11623702	11624282	580,	0,	1.18797	1.38902	9.52164	0	0.248338	1.57305
TU8091	-	Chr02	11626106	11626750	644,	0,	1.09501	1.26926	4.03324	0	0	0
TU8100	-	Chr02	11627408	11630041	426,441,	0,2192,	0.476376	0.482974	2.64169	0.086416	0	0
TU8099	-	Chr02	11629262	11630041	779,	0,	2.37346	1.46974	4.14918	0	0.221392	0.061642
TU8096	-	Chr02	11637144	11638290	1146,	0,	2.25263	3.04316	8.62365	0.131765	0.041344	0.306441
TU8095	-	Chr02	11640035	11641785	1750,	0,	4.73184	3.96548	11.3085	0.078518	0	0.210919
TU8127	-	Chr02	11872541	11873169	628,	0,	3.23708	6.82754	2.07729	0.104103	0.117193	0
TU8187	+	Chr02	12128232	12129373	1141,	0,	0.056664	0.601151	3.2712	0	0	3.18838
TU8236	-	Chr02	12500695	12501470	775,	0,	1.68278	1.61436	5.10023	0.17058	0.103523	0.873641
TU8241	-	Chr02	12555234	12555867	633,	0,	8.63505	8.87646	10.5938	0.356456	0.294411	0
TU8242	+	Chr02	12559638	12564252	4614,	0,	20.0357	18.9347	5.96187	0.360813	0.360229	0.257893
TU8247	+	Chr02	12618261	12618583	322,	0,	1.10003	0.78167	2.31953	0	0	0.373815
TU8278	+	Chr02	12889515	12889953	82,152,	0,286,	0	1.1574	2.69972	0	0	0.19837
TU8283	-	Chr02	13057437	13058569	1132,	0,	0.822447	1.25304	0	4.12348	4.17353	0
TU8284	-	Chr02	13063423	13064014	196,271,	0,320,	0.583443	1.31853	0.357803	0.134418	0	0
TU8292	-	Chr02	13118577	13119308	731,	0,	0	0	2.63724	0	0	0.307866
TU8338	-	Chr02	13490632	13491450	818,	0,	0.379949	0.683775	4.22079	0.244719	0.066417	0.407401
TU8361	-	Chr02	13491692	13492397	499,179,	0,526,	0	0.312619	1.86293	0	0.347082	4.45772
TU8388	-	Chr02	13513490	13515243	230,299,203,	0,301,1550,	0.921097	0.952456	1.65015	0	0.575639	0.436897
TU8402	-	Chr02	13516737	13518709	105,460,377,69,78,218,	0,187,684,1235,1427,1754,	0.274175	0.566151	2.03937	0.163592	0.229223	0
TU8404	-	Chr02	13516737	13518051	105,460,630,	0,187,684,	4.30251	2.00902	1.33964	0	0	0
TU8408	-	Chr02	13516737	13518253	105,460,377,69,89,	0,187,684,1235,1427,	0	1.32439	0	0	0	0
TU8387	-	Chr02	13519849	13520474	417,96,	0,529,	1.72031	1.98647	0.526645	0	0	0
TU8447	+	Chr02	13890829	13892671	1842,	0,	0.592932	1.07451	11.4843	0.076324	0.19103	1.51462
TU8472	+	Chr02	13934283	13937848	262,1405,	0,2160,	0	0.128326	64.522	0	0.017811	13.0147
TU8469	-	Chr02	13947685	13948352	354,100,	0,567,	1.27659	0.945615	0	0.057983	0	0
TU8752	-	Chr02	14568084	14569119	1035,	0,	3.50931	5.94503	3.15651	0	0.078128	0.092482
TU8750	-	Chr02	14728671	14730017	361,111,249,	0,450,1097,	1.7012	1.8877	0.491986	1.24257	2.59573	0.289936
TU8718	+	Chr02	14733075	14734117	1042,	0,	2.52311	3.21573	0.117854	1.6718	1.42353	0
TU8837	-	Chr02	15140815	15141738	923,	0,	0.544866	0.5826	4.82945	0.399285	0.448649	2.15176
TU9126	-	Chr02	16075860	16076383	523,	0,	0.975496	2.72779	2.88231	0	0.21078	0
TU9114	-	Chr02	16685314	16685792	478,	0,	2.48489	2.4378	0	0.409709	0	0
TU9122	-	Chr02	16803159	16803845	686,	0,	0	0.162354	4.5816	0	0	0
TU9317	+	Chr02	16865774	16873959	557,2009,5430,	0,667,2755,	0.628253	0.998528	3.83105	0.179893	0.649191	0
TU9325	+	Chr02	16865774	16873959	557,2009,133,317,213,676,	0,667,2755,2978,4049,7509,	0	0	1.75137	0	0.986962	0
TU9310	+	Chr02	16866435	16873959	2015,5430,	0,2094,	10.1416	12.4741	3.09625	0.357073	0.281775	0.254278
TU9311	+	Chr02	16866435	16873959	2015,133,5207,	0,2094,2317,	5.52224	4.92275	0.774503	0.261648	0.392183	0.255529
TU9312	+	Chr02	16866435	16873959	2015,133,317,213,676,	0,2094,2317,3388,6848,	2.10622	2.92706	2.35319	0.529094	0.204767	0.463029
TU9320	+	Chr02	16866435	16873959	2015,133,1284,676,	0,2094,2317,6848,	4.02203	4.77161	0.330862	0.539682	0.212737	0.350719
TU9334	+	Chr02	16874061	16874434	373,	0,	11.2692	10.6822	19.4269	4.04446	3.3001	2.68376
TU9159	-	Chr02	17253298	17255649	565,112,351,	0,1799,2000,	1.38543	2.10431	0	0.19107	0.464584	0
TU9164	+	Chr02	17341850	17345697	465,1363,	0,2484,	0.140968	0.744547	3.08122	0	0.051838	0.625722
TU9177	+	Chr02	17347949	17357331	1667,105,73,123,128,215,57,229,79,91,226,	0,1739,1937,2100,3549,3918,6476,6619,7900,8900,9156,	0.118037	0.083276	1.91457	0	0	0.164824
TU9195	-	Chr02	18384095	18465514	292,37,	0,81382,	0	2.35477	0.313297	0	0	0
TU9183	+	Chr02	18462132	18462338	206,	0,	2.68816	2.65197	0.973362	0.042128	0	0
TU9182	+	Chr02	18506520	18507593	635,174,	0,899,	0.445256	0	1.28804	0	0	0
TU9272	+	Chr02	18551095	18586392	160,35038,	0,259,	15.3398	22.5665	9.81516	0.752632	0.436536	0.333847
TU9275	+	Chr02	18551095	18586392	160,124,24714,	0,259,10583,	8.79536	14.2933	4.88134	0.761453	1.40408	0.50636
TU9277	+	Chr02	18551095	18588886	160,124,150,2241,	0,259,10583,35550,	11.8147	19.6521	7.28543	1.6188	2.10911	0.64995
TU9278	+	Chr02	18551095	18586392	160,5038,24714,	0,259,10583,	2.87594	4.86828	1.60439	0	0.602793	0
TU9279	+	Chr02	18551095	18586392	383,24714,	0,10583,	5.76429	10.1385	1.8419	0.186298	0.296147	0.12066
TU9194	+	Chr02	18588945	18595638	1806,1557,	0,5136,	4.61371	8.81589	2.8576	0.399036	0.456567	0.383336
TU9201	-	Chr02	18605444	18605678	234,	0,	0.404577	1.28321	14.7409	0	0	0
TU9255	+	Chr02	18907970	18909935	1965,	0,	0.070505	0.17678	2.33652	0.031946	0.034078	0.220099
TU9228	+	Chr02	19198258	19204692	437,583,	0,5851,	0.067913	0	1.74633	0	0	0.069047
TU9247	+	Chr02	19200749	19201376	627,	0,	3.43301	2.40859	123.836	0	0.13199	0.392119
TU9217	-	Chr02	19229982	19230729	747,	0,	0.354858	0.19573	1.93395	0	0.098524	0
TU9246	-	Chr02	20342982	20395348	198,32,	0,52334,	1.13043	0	0.644217	0	0	0
TU9256	+	Chr02	20510394	20511834	866,449,	0,991,	2.0418	2.06591	4.54443	0.972325	1.04104	1.32969
TU9257	-	Chr02	21490104	21498228	8124,	0,	0.069919	0.221222	2.09966	0	0	0.077668
TU9403	+	Chr02	21514544	21515192	648,	0,	3.01459	4.25459	1.19759	0	0	0.177849
TU9283	+	Chr02	21520656	21521318	662,	0,	2.50298	3.61828	2.08373	0	0	0
TU9287	+	Chr02	21523869	21529463	5594,	0,	2.46714	4.06729	2.39185	0.0906	0.049351	0.025294
TU9282	+	Chr02	21835657	21835953	296,	0,	0	1.08902	6.83393	0.189594	0.582649	1.16912
TU9306	+	Chr02	22263819	22264932	1113,	0,	1.07631	2.65509	0.949975	0	0	0
TU9619	+	Chr02	23944037	24124222	179,75,	0,180110,	0.97271	1.01991	0.930501	0	0	0
TU9624	+	Chr02	23964154	23964556	402,	0,	0	0	2.12536	0	0	0
TU9371	-	Chr02	24502344	24520193	234,108,	0,17741,	1.29631	0	0	0	0	0
TU9368	+	Chr02	24510779	24511365	586,	0,	1.69987	2.00526	3.84978	0	0	0
TU9395	+	Chr02	24531717	24536806	1521,286,651,602,233,	0,3019,3418,4172,4856,	0.839693	1.34159	2.80654	0.25273	0.452231	0.633017
TU9397	+	Chr02	24534098	24536806	1688,602,233,	0,1791,2475,	0.601388	1.30631	0.921225	0.357961	0.046333	0.181559
TU9366	-	Chr02	24951257	24951526	269,	0,	0	0	5.85693	0	0	0
TU9369	+	Chr02	25023382	25023839	457,	0,	0.664926	1.04784	1.9286	0	0	0
TU9386	+	Chr02	25295168	25295633	465,	0,	3.77592	5.44557	9.4166	0	0	0
TU9408	-	Chr02	25636422	25637181	759,	0,	5.41638	5.69891	4.42846	0	0	0
TU9560	-	Chr02	26236130	26241455	784,579,3076,528,	0,915,1636,4797,	0	0	3.84279	0	0	0
TU9564	-	Chr02	26236130	26241455	784,3797,528,	0,915,4797,	1.90626	2.96354	4.72342	0	0	0.118413
TU9566	-	Chr02	26236130	26241455	784,4410,	0,915,	2.60905	2.05992	6.63186	0.618266	0.663851	0.665172
TU9477	-	Chr02	26412215	26413323	1108,	0,	0.399707	0.314398	2.96235	0.061354	0.085524	0.151974
TU9485	-	Chr02	26633538	26634186	464,97,	0,551,	0	0.700538	1.45552	0	0	0
TU9507	-	Chr02	26635908	26645428	628,59,123,239,114,5792,	0,978,2799,3107,3426,3728,	0.613268	0.561916	1.75077	0.013726	0.014859	0.059111
TU9509	-	Chr02	26638404	26645428	423,433,5792,	0,611,1232,	0	0.728919	2.06761	0	0.098772	0.073472
TU9512	+	Chr02	27176651	27183708	152,2834,	0,4223,	3.50657	3.21495	6.90576	0.351958	0.188823	0.318949
TU9511	+	Chr02	27185283	27189321	4038,	0,	1.81705	1.12878	2.78016	0.158178	0.039503	0.203509
TU9518	-	Chr02	27307221	27308265	457,555,	0,489,	0.903998	0.214776	1.54609	0	0	0
TU9641	-	Chr02	27329683	27334827	1805,105,172,329,	0,1896,2736,4815,	1.20541	0.933519	5.29563	0	0	0.063762
TU9540	-	Chr02	27339509	27347784	294,124,	0,8151,	0.617588	1.05757	0.617439	0.755721	0.752643	0.279538
TU9547	-	Chr02	27341366	27342199	833,	0,	2.31404	1.39535	1.91506	0.070844	0.372368	0.080705
TU9543	+	Chr02	27387500	27390405	2905,	0,	16.6698	10.6748	3.44493	0.370435	0.234753	0.142818
TU9548	-	Chr02	27449396	27450727	1331,	0,	3.35064	2.61207	0.670051	0	0	0
TU9591	-	Chr02	27842517	27843298	781,	0,	0.638019	0.795325	12.3575	0.045558	0	0.225443
TU9588	+	Chr02	27877582	27878048	466,	0,	0.708571	1.82252	1.96307	0	0	0.118846
TU9594	+	Chr02	27932555	27934393	1838,	0,	0.343971	0.650804	4.01321	0	0	0.184971
TU9601	-	Chr02	28022263	28026493	2433,520,	0,3710,	0	0.057321	1.54605	0.050548	0	0.053228
TU9604	+	Chr02	28046752	28047531	205,251,	0,528,	0.383829	0.619754	2.44319	0.206174	0.928901	1.15274
TU9606	+	Chr02	28263742	28264360	618,	0,	0.127035	0.342971	31.9998	0	0	0.56929
TU9609	-	Chr02	28278313	28278761	448,	0,	0.525721	2.37544	0.253445	0.114936	0.095183	0
TU9712	+	Chr02	29754340	29759926	139,96,64,654,239,345,70,96,1020,	0,1771,2056,2730,3472,3792,4217,4389,4566,	1.02642	0.449538	0.200099	0.572611	0	0
TU9714	+	Chr02	29754340	29759926	139,96,64,654,239,168,105,70,96,1020,	0,1771,2056,2730,3472,3792,4032,4217,4389,4566,	0.814013	1.42153	0	0	0	0
TU9716	+	Chr02	29754340	29759926	139,96,64,654,239,168,102,70,96,1020,	0,1771,2056,2730,3472,3792,4035,4217,4389,4566,	0.89499	2.22224	0	0.202571	0	0
TU9717	+	Chr02	29754340	29756678	1867,282,	0,2056,	1.01379	2.05263	0.068963	0	0.085251	0
TU9719	+	Chr02	29754340	29759926	139,96,64,727,239,168,105,70,96,1020,	0,1771,2056,2657,3472,3792,4032,4217,4389,4566,	1.45368	0.451245	0.008524	0.048495	1.16839	0.032083
TU9720	+	Chr02	29760043	29765593	5550,	0,	1.66743	2.34437	0.231642	0.086053	0.189008	0.011709
TU9688	+	Chr02	30012129	30012603	35,252,	0,222,	1.33394	2.08222	4.3364	0	0	0
TU9702	+	Chr02	30024031	30030447	284,118,3784,	0,1008,2632,	0	0	2.75484	0	0.379425	0.203503
TU9704	+	Chr02	30024031	30033303	284,118,3257,546,	0,1008,2632,8726,	1.35062	2.40431	1.13899	0.074779	0.032805	0
TU9689	+	Chr02	30047015	30047262	32,189,	0,58,	0	1.30985	0	0	0	0
TU9705	+	Chr02	30400040	30403495	395,69,1221,	0,1211,2234,	2.49439	2.42798	0.695818	0.381954	0.427832	0.130831
TU9706	+	Chr02	30400040	30400729	689,	0,	1.38592	1.26298	0.957343	0.03324	0.631612	0.141419
TU9723	-	Chr02	30414463	30416383	54,212,	0,1708,	1.47571	0.693535	0	0	0.353867	0.080634
TU9761	-	Chr02	30704689	30709354	178,122,36,767,131,559,	0,427,718,1012,2022,4106,	0.67657	1.30199	5.26309	0.321344	0.65124	1.07575
TU9762	-	Chr02	30704689	30708561	178,108,36,767,131,1611,	0,427,718,1012,2022,2261,	0.070691	1.08109	3.08313	0.209843	0.075939	0.890059
TU9763	-	Chr02	30704689	30708561	178,122,36,767,1850,	0,427,718,1012,2022,	1.23801	0.815388	3.92888	0.121161	0.360366	0.945795
TU9764	-	Chr02	30704689	30709354	178,122,36,939,131,164,559,	0,427,718,840,2022,2261,4106,	0.764905	0.035119	3.44984	0	0.240979	0.284805
TU9765	-	Chr02	30704689	30708561	754,767,131,1611,	0,1012,2022,2261,	0.514431	1.01555	3.69996	0.040176	0.273088	0.414885
TU9767	-	Chr02	30704689	30709354	178,122,36,767,131,164,559,	0,427,718,1012,2022,2261,4106,	0	0	2.13006	0	0	0.163319
TU9707	-	Chr02	30904754	30906391	729,489,	0,1148,	1.67169	2.54665	0	0.183589	0.387703	0
TU9740	-	Chr02	31307713	31312833	1013,246,	0,4874,	0	0	4.5937	0	0	0
TU9725	+	Chr02	31311636	31312003	367,	0,	0	0.39973	3.43941	0	0	1.04761
TU9752	-	Chr02	31963980	31964266	286,	0,	0.389148	2.47207	0.908043	0	0	0.4343
TU9786	+	Chr02	32394343	32394603	260,	0,	0.278862	1.13036	4.66903	0.165778	0	0.667345
TU9793	+	Chr02	32605763	32606611	848,	0,	2.21865	3.17353	2.5706	0.145321	0.040973	0
TU9794	+	Chr02	32811899	32812196	297,	0,	0.878528	1.46861	2.00776	0	0.223341	0
TU9826	+	Chr02	33951232	33957790	146,545,	0,6013,	0	0.235734	0.239484	1.1793	1.60311	0
TU9825	+	Chr02	34010100	34010559	459,	0,	1.48403	0.411712	1.98686	0	0.063665	0
TU9833	-	Chr02	34130583	34131289	706,	0,	0.457231	1.51431	2.71523	0	0	0
TU9852	+	Chr02	34408661	34450227	258,194,587,	0,40162,40979,	0.640489	0.952472	2.28522	0	0	0
TU9857	+	Chr02	34409683	34409937	254,	0,	1.38361	1.95483	2.78675	0	0	0
TU9850	+	Chr02	34450866	34490538	308,12,	0,39660,	0	0	1.27585	0	0	0
TU9863	-	Chr02	34734866	34735279	61,254,	0,159,	1.64199	0.568518	1.08776	0	0	0
TU9895	-	Chr02	35487797	35488068	271,	0,	0	0	0	0	0	1.75539
TU9896	-	Chr02	35590403	35591044	641,	0,	0.638321	1.05629	3.38566	0	0.141426	0
TU9909	-	Chr02	36109820	36110493	673,	0,	2.36326	1.24956	0.122645	0	0	0
TU9910	+	Chr02	36121863	36122118	255,	0,	0	0	2.58634	0	0	0
TU10054	-	Chr02	37175323	37175900	577,	0,	1.18732	2.37326	0.375421	3.1976	2.69665	0.095428
TU9994	+	Chr02	37175350	37175889	539,	0,	1.20424	0	0.401889	0	0	0.102156
TU9991	-	Chr02	37314271	37314487	216,	0,	0	0.422495	12.2263	0	0	0
TU9996	-	Chr02	37405889	37406198	309,	0,	7.24549	6.75621	10.8686	0.217192	0.573469	0.320129
TU9999	-	Chr02	37407106	37413316	6210,	0,	2.79867	3.61864	1.18794	0.224295	0.335553	0.100111
TU10011	-	Chr02	37556576	37557022	446,	0,	2.34219	2.5588	1.3677	0	0.120398	0.193082
TU10012	-	Chr02	37558356	37559113	757,	0,	11.0871	12.6477	7.67827	0.097445	0	0
TU10071	-	Chr02	38379913	38380702	459,227,	0,562,	0.652997	0	3.86965	0	0	1.71591
TU10126	+	Chr02	38792329	38797819	1742,90,877,	0,1826,4613,	3.58333	1.44453	19.3338	2.02232	1.10379	8.6784
TU10128	+	Chr02	38792329	38795609	1742,90,512,	0,1826,2768,	0.597318	1.11916	7.52231	0.457022	0.107592	1.51827
TU10129	+	Chr02	38792329	38795609	1742,1454,	0,1826,	3.43615	1.62428	7.1425	0.398016	0.278119	0.47314
TU10146	+	Chr02	38975659	38980555	362,505,	0,4391,	1.6965	2.79557	0.751401	1.75969	1.8595	1.15793
TU10214	-	Chr02	39217015	39217233	218,	0,	2.32388	2.07734	0.284431	1.49947	1.6344	0
TU10385	+	Chr02	40092865	40095063	298,476,	0,1722,	0.696295	0	2.77423	1.31035	0.921486	3.3415
TU10462	+	Chr02	40493286	40494864	1578,	0,	1.07609	0.39021	33.7199	0.090193	0	0.348936
TU10471	+	Chr02	40608003	40608382	379,	0,	0.587315	0	0.659728	0.051902	0.352539	2.42926
TU10588	+	Chr02	41046403	41047009	606,	0,	0.21795	0.129541	11.8459	0	0	0.867411
TU10604	+	Chr02	41160361	41160909	548,	0,	3.04306	2.64569	0.473905	0.270274	0	0
TU10650	-	Chr02	41323779	41324407	628,	0,	0.361801	1.63364	0.390454	2.13457	2.43138	0.269663
TU10666	-	Chr02	41324650	41325063	413,	0,	5.9667	8.42521	0.808196	1.7854	2.11331	0.177505
TU10692	+	Chr02	41532779	41535361	2582,	0,	55.4852	52.0587	19.9788	2.36845	2.4018	0.340338
TU10743	+	Chr02	41646626	41651856	1139,3963,	0,1267,	1.64975	3.12472	0.015941	0.244259	0	0
TU10727	+	Chr02	41662617	41663262	645,	0,	1.53221	2.44863	0.992544	0.905507	1.91235	0
TU10781	-	Chr02	41835551	41836644	1093,	0,	0.223934	0.331282	5.88335	0.048169	0.029477	0.463059
TU10827	+	Chr02	41954195	41955235	1040,	0,	0.16785	0.878904	6.72325	0.189143	0.589519	2.16795
TU10834	+	Chr02	41956065	41969998	342,687,	0,13246,	0.066871	0.130646	0.59515	0.17486	0.466281	1.98859
TU10848	+	Chr02	41956802	41958322	1520,	0,	0.091147	0.727243	7.80054	0.086593	0.170195	4.06458
TU10852	+	Chr02	41960393	41961096	703,	0,	0.193133	0.149355	4.78008	0	0.053019	0.136157
TU10835	+	Chr02	41984749	41986633	138,1199,	0,685,	0.611026	1.99191	0.316507	0.640652	0.814122	0.084043
TU10895	-	Chr02	42452892	42454027	201,650,	0,485,	0.391264	0.330936	1.4	0.082942	0	0
TU10905	-	Chr02	42511409	42511720	311,	0,	1.28743	1.56657	2.70193	0	0	0
TU11006	+	Chr02	42959802	42960240	167,131,	0,307,	2.27567	2.64418	1.17478	0.257487	0.413384	0
TU11147	-	Chr02	43444565	43445126	561,	0,	1.61592	2.70682	0.262682	0	0.459444	0
TU11262	-	Chr02	43893565	43894433	868,	0,	2.51867	3.4243	4.77782	0.637877	0.802771	0.57719
TU11313	-	Chr02	44045063	44048300	3237,	0,	1.21195	3.85114	0.836244	0.345042	0.278787	0.086337
TU11354	-	Chr02	44126461	44127341	339,85,286,	0,425,594,	0	0	1.25498	0	0	0.107762
TU11378	+	Chr02	44334245	44335108	863,	0,	0.160002	0	45.4498	0	0	3.09965
TU11379	+	Chr02	44335444	44337498	2054,	0,	0.141196	0.003344	24.0386	0	0	4.29914
TU11423	+	Chr02	44557571	44558053	118,54,46,	0,310,436,	0	1.00378	0	2.4708	1.45908	0
TU11422	+	Chr02	44559062	44560191	382,711,	0,418,	0.282241	0.34026	0	0.979256	1.29902	0
TU11441	-	Chr02	44670292	44672560	2268,	0,	1.02177	2.8573	0.047933	0.127675	0.201665	0
TU11525	+	Chr02	44993478	44995724	208,1938,	0,308,	8.5465	8.64334	0.964563	72.5297	50.2282	3.63956
TU11581	-	Chr02	45228771	45229896	1125,	0,	2.4166	1.16619	0	2.08769	1.36286	0
TU11597	-	Chr02	45328451	45328939	488,	0,	0	0	2.41251	0	0	0
TU11641	-	Chr02	45409620	45411194	1574,	0,	0	0	4.78124	0	0.080472	1.74627
TU11698	+	Chr02	45441170	45446848	283,87,92,325,365,	0,4245,4726,4933,5313,	0.190015	0.472266	1.07188	0.453097	0.622123	0.242387
TU11702	-	Chr02	45484975	45490001	5026,	0,	2.0617	2.22789	15.24	0.034191	0.028178	0.094204
TU11819	-	Chr02	45998165	45998459	294,	0,	228.989	216.332	45.2486	1.14826	1.26347	0.827544
TU12081	+	Chr02	46953108	46955785	414,70,1811,	0,648,866,	0.190058	0.052429	0	1.03332	1.1574	0.316005
TU12084	+	Chr02	46953108	46955785	2677,	0,	4.78897	4.11991	1.00535	3.93699	4.47084	0.236612
TU12086	+	Chr02	46953108	46955785	718,1811,	0,866,	0	0.477816	0.443356	0.25484	1.5856	1.41317
TU12076	+	Chr02	46956192	46956775	583,	0,	1.28879	2.58364	0	0	0.108359	0
TU12467	-	Chr02	47572645	47576710	4065,	0,	0.00125	0.237052	3.32132	0.018147	0.002331	0
TU12334	-	Chr02	47675162	47675667	140,214,	0,291,	0.849261	1.19749	3.92172	0.464969	0.532693	2.30059
TU12413	+	Chr02	47891513	47892466	25,327,	0,626,	0	0.315012	1.30628	0	0	0.153698
TU12710	+	Chr02	48567657	48576909	416,85,76,227,101,162,65,102,137,199,156,160,349,	0,510,824,1415,1743,2395,2912,3289,4507,7927,8221,8485,8903,	3.40976	2.9249	0.00911	1.00378	1.01242	0
TU12714	+	Chr02	48567657	48576909	416,85,76,65,56,101,162,65,102,137,199,156,160,349,	0,510,824,1415,1586,1743,2395,2912,3289,4507,7927,8221,8485,8903,	3.02632	3.07974	0	0.9675	1.87248	0
TU12719	+	Chr02	48567657	48576909	416,85,818,101,162,65,102,137,161,156,160,349,	0,510,824,1743,2395,2912,3289,4507,7965,8221,8485,8903,	3.03019	0.724753	0.112225	0	0.09856	0
TU12721	+	Chr02	48567657	48576909	595,76,429,162,65,102,462,1325,	0,824,1415,2395,2912,3289,4182,7927,	4.5362	5.28966	0.081037	0.352531	0.415987	0
TU12722	+	Chr02	48567657	48576909	416,85,818,101,162,65,102,137,199,156,160,349,	0,510,824,1743,2395,2912,3289,4507,7927,8221,8485,8903,	4.09403	3.56241	0.116419	0.405543	0	0
TU12715	+	Chr02	48573367	48576909	2416,156,160,349,	0,2511,2775,3193,	2.76957	5.33925	0	0.664665	0.283259	0
TU12718	+	Chr02	48573367	48576909	2667,767,	0,2775,	3.63733	1.80938	0.205904	0.206096	0.556868	0
TU12858	-	Chr03	514976	520427	586,61,210,45,2389,	0,699,2181,2936,3062,	2.60443	2.36473	2.03423	1.6662	2.08787	0.275098
TU12861	-	Chr03	514976	520427	2391,45,2389,	0,2936,3062,	2.55735	5.54398	1.43164	0.577699	0.699693	0.254648
TU12863	-	Chr03	514976	520427	760,210,45,1846,440,	0,2181,2936,3062,5011,	1.05805	0.498068	0.155007	0.185805	0.562177	0
TU12866	-	Chr03	514976	520427	2391,2515,	0,2936,	3.07638	0.962508	0.013273	0.648309	0	0
TU12870	-	Chr03	514976	520427	760,210,45,2389,	0,2181,2936,3062,	2.44301	0.94206	0.147289	0.694187	0.620964	0.149069
TU12871	-	Chr03	514976	520427	2981,1734,440,	0,3062,5011,	3.28016	2.88652	0.684589	0.608838	0.486887	0.019105
TU13042	-	Chr03	1100996	1122924	2295,1676,92,136,68,1489,125,342,525,92,1901,744,6823,	0,3592,5425,5854,6233,6727,8453,8684,10303,10975,11854,14245,15105,	0.052451	1.79773	0.058067	0	0	0
TU13043	-	Chr03	1100996	1122924	5268,92,136,68,155,1261,90,101,222,92,133,63,97,111,3566,2920,	0,5425,5854,6233,6727,7317,8936,10303,10606,10975,11854,13248,13658,14245,15338,19008,	0.293592	0.08291	2.37933	0	0.067136	0.071871
TU13044	-	Chr03	1100996	1122924	5268,92,136,1360,125,342,525,92,10074,	0,5425,5854,6233,8453,8684,10303,10975,11854,	1.66261	1.9432	0.562895	0.064237	0.217165	0.055519
TU13048	-	Chr03	1100996	1122924	5268,565,68,2299,525,92,133,507,7683,	0,5425,6233,6727,10303,10975,11854,13248,14245,	2.40421	0.027969	0.744447	0	0.073097	0
TU13051	-	Chr03	1100996	1122924	5268,565,68,2299,525,92,10074,	0,5425,6233,6727,10303,10975,11854,	1.19155	0	0.347991	0.010269	0.001233	0.040158
TU12917	-	Chr03	1259774	1260752	978,	0,	0.225711	0	3.38535	0	0	0.086088
TU13089	-	Chr03	1880814	1881329	515,	0,	0	0.011432	2.29229	0	0	0.096349
TU13092	-	Chr03	1881600	1882133	533,	0,	0	0	2.02073	0	0	0
TU13235	-	Chr03	2718273	2718849	576,	0,	2.35796	2.64485	3.33992	0	0	0
TU13333	-	Chr03	3315480	3317365	1885,	0,	2.6041	1.50329	0.106159	0.102296	0.172253	0
TU13326	+	Chr03	3369901	3370722	821,	0,	0.105749	0.035857	2.56834	0	0	0
TU13336	-	Chr03	3470554	3472767	209,887,	0,1326,	0	0.235471	1.75198	0	0	0.108949
TU14315	-	Chr03	3537238	3538265	1027,	0,	3.14536	6.06156	0	0.659685	0.826424	0.085098
TU13935	+	Chr03	4081050	4081498	448,	0,	3.42544	3.44104	2.72858	0	0.11422	0
TU13354	+	Chr03	4523872	4524901	1029,	0,	0	0.573604	3.91993	0	0.253861	1.91611
TU13390	-	Chr03	4526151	4529152	3001,	0,	2.96487	2.94893	5.17202	0.005104	1.10874	0.465949
TU13392	-	Chr03	4526151	4529152	2778,103,	0,2898,	0	0	0	1.71686	0	0
TU13396	-	Chr03	4546839	4549702	491,666,	0,2197,	2.62358	3.62233	14.8867	0.052755	0.096098	1.46534
TU13694	-	Chr03	4746126	4746351	225,	0,	0.513122	2.38123	1.6696	0	0	0
TU13697	-	Chr03	4762720	4762990	270,	0,	1.27425	1.163	2.35766	0	0	0
TU13912	+	Chr03	5477522	5479499	284,203,184,	0,767,1793,	0.359951	1.4317	0.508845	0.393607	0.128042	0.156486
TU13418	+	Chr03	5660871	5661186	315,	0,	0	0.274135	1.92498	0	0	0
TU13428	+	Chr03	5725044	5725259	215,	0,	0	0	2.89149	0	0	0
TU13458	-	Chr03	5858284	5859366	1082,	0,	0.19548	0.390425	2.75705	0.129934	0	0.172195
TU13689	+	Chr03	5953480	5954122	524,11,	0,631,	0.180408	0.243944	1.24779	0	0	0.0736
TU13509	-	Chr03	6000002	6001309	324,246,	0,1061,	0	0.542864	1.79768	0	0	0
TU13470	-	Chr03	6123405	6123956	551,	0,	0	0	2.7958	0	0	0.392753
TU13611	+	Chr03	6217181	6222440	1516,54,76,91,1213,	0,1618,2289,3381,4046,	0.185976	0.382366	3.57254	0.046284	0.074095	0.181443
TU13528	-	Chr03	6285956	6286944	988,	0,	0	0	4.2126	0	0	1.28473
TU13494	+	Chr03	6288250	6289199	725,146,	0,803,	0	0	4.77801	0	0	0.160616
TU13507	-	Chr03	6532702	6533511	809,	0,	0	0	2.18389	0	0	0.213683
TU13513	-	Chr03	6533785	6534218	433,	0,	0.237838	0	2.34422	0	0	0.720105
TU13587	-	Chr03	6571258	6586557	14186,352,	0,14947,	4.09207	4.33627	13.0226	0.076747	0.063421	0.193491
TU13588	-	Chr03	6571258	6586557	1289,6027,352,	0,8159,14947,	1.29699	0	2.47673	0	0	0
TU13530	+	Chr03	6627663	6630351	675,1468,337,	0,855,2351,	6.30054	5.49535	4.80078	2.36006	2.82333	1.46614
TU13562	+	Chr03	6906381	6906733	184,75,	0,277,	1.16077	1.31847	0	0	0	0
TU13897	-	Chr03	7012138	7025895	2479,238,	0,13519,	0.672443	0.397497	2.57743	0.983874	0.822592	2.13393
TU13898	-	Chr03	7012138	7023871	3394,3048,	0,8685,	2.4499	3.31808	13.3182	0.019943	0.229194	0.269735
TU13931	-	Chr03	7056217	7056635	418,	0,	2.5488	5.28669	0	0	0.17078	0
TU13941	-	Chr03	7089272	7091700	2428,	0,	0.268755	0.330393	8.15503	0	0	0.211881
TU13584	-	Chr03	7556752	7559000	2248,	0,	0.234603	0.310141	1.92739	0	0	0.18527
TU13610	-	Chr03	7664367	7664631	264,	0,	1.82625	1.38271	9.99269	0.317767	0	0
TU13614	-	Chr03	7729432	7731580	2148,	0,	6.50555	6.01261	2.48817	0.17925	0.544093	0.131599
TU13736	+	Chr03	9192016	9194061	2045,	0,	1.14877	2.37018	6.29549	0.070021	0.111674	0.329678
TU13758	+	Chr03	10004381	10005435	1054,	0,	0.085439	0	2.54493	0	0	0
TU13760	+	Chr03	10005665	10006036	371,	0,	0	0	2.19008	0	0	0
TU13770	+	Chr03	10025650	10026154	139,253,	0,251,	0	0	0.239322	0	0	1.03879
TU13778	-	Chr03	10193006	10193410	404,	0,	2.68856	3.94454	0	0	0	0.245643
TU13781	-	Chr03	10195365	10195684	319,	0,	0	1.78254	0	0	0	0
TU13779	-	Chr03	10348677	10349907	1007,124,	0,1106,	0	0.160943	2.08901	0	0	0.159074
TU13783	+	Chr03	10707980	10709823	1843,	0,	0.263355	0.754194	2.12897	0	0.051416	0.256728
TU13784	+	Chr03	10882662	10885057	2395,	0,	0.187231	0.908348	2.71624	0.018117	0.040885	0.308634
TU13787	-	Chr03	10970963	10987665	121,183,	0,16519,	0	0	2.38138	0	0	0
TU13788	+	Chr03	11050033	11094480	155,112,	0,44335,	0	0.356494	1.29839	0	0	0
TU13937	-	Chr03	11404250	11407568	599,2679,	0,639,	2.12745	2.27149	1.18445	0.093014	0.178073	0
TU14147	-	Chr03	11443913	11444534	396,113,	0,508,	1.21486	2.14281	4.5255	0	0	1.44467
TU13789	+	Chr03	11798071	11798420	349,	0,	2.11454	2.00192	10.6266	0	0	0.232988
TU13791	+	Chr03	11851229	11853629	2400,	0,	1.34483	1.02278	3.15734	0	0	0.115513
TU13799	+	Chr03	11854605	11855424	89,235,	0,584,	0	0.425523	1.12962	0.118747	0	0
TU13804	-	Chr03	11858055	11867392	184,43,	0,9294,	0	0	1.07488	0	0	0
TU13811	+	Chr03	11945163	11945448	285,	0,	1.59932	4.59823	1.49752	0	0	0
TU13840	-	Chr03	12379625	12384082	4457,	0,	3.0903	4.48763	1.55941	0.141945	0.259314	0.021548
TU13843	+	Chr03	12407914	12409505	687,316,	0,1275,	0.233438	0.539067	2.10752	0	0	0
TU13848	+	Chr03	12865472	12866051	579,	0,	0.993809	2.72182	0	0	0	0
TU13851	-	Chr03	13288813	13289057	244,	0,	10.0065	6.71009	0.846525	1.35154	0.987735	0
TU13878	-	Chr03	13427618	13430238	2620,	0,	0.615512	2.63559	1.63974	0.015237	0.134907	0.063659
TU13880	-	Chr03	13554426	13556121	1695,	0,	0.058305	0.287436	2.16948	0	0.044725	0.209453
TU13903	+	Chr03	13650826	13651430	292,76,50,	0,391,554,	0.984385	0.829861	2.76355	0	0.185138	0.631833
TU13904	+	Chr03	13653793	13655296	96,85,57,290,	0,650,912,1213,	0	1.03982	1.09428	0.088756	0.217159	0.500807
TU13933	-	Chr03	14464571	14465108	537,	0,	0	0.354503	1.98844	0	0	0.178843
TU13945	+	Chr03	15635900	15636575	675,	0,	1.02761	2.84571	3.10656	0	0	0
TU13949	+	Chr03	15730386	15731090	704,	0,	0.45197	2.88181	0.678304	0	0	0.096402
TU13963	-	Chr03	16686764	16687780	1016,	0,	1.3618	3.0607	6.1933	0.273903	0.262705	0.108705
TU14013	-	Chr03	18250845	18251499	654,	0,	0.523244	0.692446	2.74026	0	0	0
TU14016	+	Chr03	18426516	18426789	273,	0,	1.74744	1.3551	8.91698	0	0	0
TU14050	-	Chr03	18591856	18592184	328,	0,	0.644844	1.85934	5.99412	0	0.226308	0
TU14066	+	Chr03	18809625	18809840	215,	0,	3.05654	6.0109	12.0454	0	0.308522	0.923162
TU14103	+	Chr03	19166173	19166419	246,	0,	3.38661	4.51149	0	4.60845	10.0128	0.20431
TU14110	+	Chr03	19301196	19302891	66,549,	0,1146,	0.862046	0.708435	0	1.02917	1.45351	0
TU14123	-	Chr03	19459388	19468229	259,103,	0,8738,	1.26934	0.468953	0.179073	0	0	0
TU14202	-	Chr03	19711130	19716046	640,105,541,274,647,	0,721,911,1541,4269,	0.478328	2.09588	0.827254	0	0.846517	0
TU14203	-	Chr03	19711130	19716046	640,731,3375,	0,721,1541,	0.977193	3.2975	1.71192	0	0.347698	0.181419
TU14204	-	Chr03	19711130	19716046	640,105,284,127,274,647,	0,721,911,1325,1541,4269,	0.291712	0	0	1.43146	1.38767	0
TU14206	-	Chr03	19711130	19716046	640,474,127,3375,	0,721,1325,1541,	1.04435	0	0	0.431456	0.318324	0.167434
TU14207	-	Chr03	19711130	19716046	4916,	0,	0.747117	2.02825	1.23163	0.035708	0.092227	0.035032
TU14215	-	Chr03	19711130	19716046	640,105,284,127,3375,	0,721,911,1325,1541,	2.57215	0	0	0.386849	0.649596	0.285751
TU14150	+	Chr03	20037441	20039072	459,659,	0,972,	1.60023	1.53599	0	0.289278	0.47691	0
TU14189	-	Chr03	20154031	20154520	119,162,65,	0,166,424,	0.67136	1.61797	0.598135	0	0	0
TU14169	+	Chr03	20262099	20263288	1189,	0,	2.3308	3.51246	0.57026	0.189527	0.62297	0.148891
TU14187	-	Chr03	20604833	20605152	319,	0,	0	1.08587	2.03716	0	0	0
TU14195	+	Chr03	20915842	20917990	343,130,776,	0,1130,1372,	0.655239	1.05042	0	0.115341	0.115507	0
TU14197	+	Chr03	20916449	20936706	653,157,82,76,76,923,	0,765,2957,3804,18369,19334,	0.773856	1.29175	0	0.08868	0.051269	0.080073
TU14219	-	Chr03	21746689	21749667	2978,	0,	4.17413	6.38457	1.88352	2.22068	4.12357	0.948024
TU14232	+	Chr03	21761416	21785116	242,5329,	0,18371,	1.86808	3.07324	0.048514	0.089395	0.237652	0
TU14244	+	Chr03	21773248	21773728	480,	0,	1.10397	3.45696	0.666454	0	0	0
TU14231	-	Chr03	22149203	22149780	577,	0,	0	0.860531	0	2.37839	3.91304	0.087661
TU14240	-	Chr03	22155958	22156442	484,	0,	6.92429	1.55301	0.2113	0.297048	0	0
TU14330	+	Chr03	22277458	22286392	962,4219,3072,	0,1144,5862,	1.3607	1.70906	8.98283	0.00694	0.048109	0.049301
TU14336	+	Chr03	22288758	22289356	598,	0,	2.26735	3.20802	9.23302	0	0	0
TU14306	+	Chr03	22290021	22290802	781,	0,	0.474587	0.736272	8.91287	0	0	0.122969
TU14255	+	Chr03	22294125	22339896	14859,18575,10431,	0,16418,35340,	0.485772	0.642501	7.40299	0.029643	0.03774	0.416708
TU14256	+	Chr03	22310211	22339896	18902,10432,	0,19253,	0	0	3.05285	0	0	0.047881
TU14270	-	Chr03	22351916	22353076	590,453,	0,707,	5.02387	7.80927	4.14142	3.06695	2.58996	1.32226
TU14235	-	Chr03	22559988	22565252	535,672,222,	0,3249,5042,	0	0	2.52936	0	0	0
TU14253	-	Chr03	22587440	22591011	2051,112,1260,	0,2127,2311,	0	0	2.81245	0.022733	0	0.940653
TU14242	-	Chr03	22591068	22599054	116,7774,	0,212,	0.071467	0.113861	6.45115	0	0.01157	0.284221
TU14250	-	Chr03	22602782	22603420	638,	0,	0.283022	0	2.55592	0	0	0.274468
TU14251	-	Chr03	22603910	22605445	1535,	0,	0.074612	0.146073	4.65982	0	0	0
TU14252	-	Chr03	22606308	22607352	1044,	0,	0	0.125949	2.66148	0	0	0
TU14254	-	Chr03	22607554	22608551	997,	0,	0.136181	0	4.41324	0	0	0.096328
TU14260	-	Chr03	22610777	22613860	3083,	0,	0.089876	0	1.99411	0	0	0
TU14267	-	Chr03	22614490	22616093	1603,	0,	0.076344	0.215783	2.97493	0	0	0.513244
TU14268	-	Chr03	22616811	22618303	27,1213,	0,279,	0.111728	0.356505	6.22462	0	0	0.139411
TU14277	-	Chr03	22624762	22645087	271,195,442,	0,19507,19883,	0.775324	0.376289	2.92649	0.005	0	0.031266
TU14276	-	Chr03	22638515	22645087	5949,442,	0,6130,	0.691781	0.508114	8.57665	0.02423	0	0.106959
TU14269	-	Chr03	22759732	22760415	179,166,	0,517,	1.02803	0	0	0	0	0
TU14278	-	Chr03	22966688	22975174	2167,130,82,1468,	0,2331,2559,7018,	0.125926	0.152281	1.61986	0	0	0.190063
TU14291	-	Chr03	23846457	23848442	69,318,	0,1667,	1.98686	0	0	0	0	0
TU14292	-	Chr03	23888290	23948722	195,146,	0,60286,	1.38001	0.388483	1.07921	0	0	0
TU14307	+	Chr03	24935565	24935896	331,	0,	0.666904	2.2516	3.17486	0.045446	0	0
TU14325	-	Chr03	25162906	25163309	403,	0,	0.328882	3.31638	1.89728	0.107671	0	0
TU14328	-	Chr03	25398959	25399272	313,	0,	1.04756	0.289994	3.20565	0	0	0
TU14329	-	Chr03	25499098	25503662	735,3747,	0,817,	2.14502	4.53442	0.213445	0.143671	0.290709	0
TU14377	+	Chr03	26275675	26277797	2122,	0,	0.443311	1.17804	7.68518	0.022357	0	0.383943
TU14398	-	Chr03	26571344	26571843	499,	0,	0.138821	1.23299	3.75686	0	0	0
TU14426	+	Chr03	26769089	26776860	437,1044,	0,6727,	3.62058	5.26882	0.055189	2.43415	3.20603	0
TU14574	-	Chr03	27628998	27630397	1399,	0,	2.62834	3.48762	3.79428	0.337663	0	0
TU14466	+	Chr03	28454655	28454913	115,93,	0,165,	0.27531	1.47663	0	0	0	0
TU14467	-	Chr03	28455278	28455983	705,	0,	1.84265	2.56454	0.263855	0	0.378146	0
TU14491	-	Chr03	28585778	28586144	79,152,	0,214,	1.55136	1.95831	1.35432	0	0.724719	0
TU14664	+	Chr03	28855455	28867669	205,598,	0,11616,	3.13088	4.03754	4.12614	0	0	0
TU14874	+	Chr03	28906011	28927774	241,68,134,4884,289,578,678,254,168,104,73,96,1829,144,153,1323,72,300,114,176,	0,4357,5779,6405,11404,11790,12523,13299,13642,13887,14088,14246,14439,16905,17154,17947,19609,19896,21285,21587,	0	0	30.4873	0	0	0
TU14878	+	Chr03	28906011	28926394	241,68,134,289,578,678,254,168,73,96,1829,144,153,1252,	0,4357,5779,11404,11790,12523,13299,13642,14088,14246,14439,16905,17154,19131,	1.91758	5.97303	8.24658	2.32804	2.45337	1.70311
TU14880	+	Chr03	28906011	28927774	241,136,68,134,4884,289,578,678,254,168,104,73,96,1829,144,153,1323,77,300,114,176,	0,2480,4357,5779,6405,11404,11790,12523,13299,13642,13887,14088,14246,14439,16905,17154,17947,19604,19896,21285,21587,	0.142766	0.341262	8.63018	0.006102	0	0
TU14882	+	Chr03	28906011	28926394	241,136,68,134,4884,289,581,678,254,168,73,96,987,196,144,153,139,72,487,	0,2480,4357,5779,6405,11404,11790,12523,13299,13642,14088,14246,14439,16072,16905,17154,19131,19609,19896,	11.4107	11.8089	4.67768	0	0.424713	3.21589
TU14883	+	Chr03	28906011	28927774	241,68,134,4884,289,213,274,678,254,168,104,73,96,449,1283,144,153,1323,72,300,114,176,	0,4357,5779,6405,11404,11790,12097,12523,13299,13642,13887,14088,14246,14439,14985,16905,17154,17947,19609,19896,21285,21587,	0.761842	1.63526	24.9078	1.07572	1.90633	1.53814
TU14886	+	Chr03	28906011	28926394	241,136,68,134,4884,289,578,678,254,168,104,73,96,1829,144,153,1252,	0,2480,4357,5779,6405,11404,11790,12523,13299,13642,13887,14088,14246,14439,16905,17154,19131,	12.1948	12.5187	8.89874	0	0	1.63582
TU14898	+	Chr03	28954932	28957218	2286,	0,	2.36218	3.54007	1.42966	0.341793	0.403056	0.042012
TU14905	+	Chr03	28958232	28958989	304,412,	0,345,	0.593387	1.08201	1.05664	0	0	0
TU14584	+	Chr03	29203207	29203744	537,	0,	1.80338	1.34674	3.55549	0	0	0
TU14603	+	Chr03	29227230	29229292	1148,128,66,270,	0,1398,1636,1792,	0	0.362501	2.29716	0	0	0.306029
TU14593	+	Chr03	29229407	29231219	37,86,1173,	0,469,639,	0	0.292642	1.77676	0	0.105046	0.681015
TU14602	-	Chr03	29354581	29355001	420,	0,	0.601453	0.30957	1.97963	0	0	0
TU14637	-	Chr03	29602893	29604289	1396,	0,	0.769041	0.56058	1.1678	0.226076	0.618386	0.055469
TU14622	+	Chr03	29650336	29653660	567,914,	0,2410,	0.237297	0.260393	4.68106	0	0.057799	1.35852
TU14623	+	Chr03	29650336	29654188	567,351,	0,3501,	0	0	1.34951	0	0	0.944391
TU14620	+	Chr03	29654856	29655357	501,	0,	19.715	22.1777	21.6708	1.5584	0.326586	1.10799
TU14692	-	Chr03	30006515	30010594	232,97,236,106,91,265,399,	0,841,1054,1575,2778,3333,3680,	1.48785	0.500761	0	0.145773	0.173883	0
TU14687	+	Chr03	30039534	30041990	1007,572,713,	0,1091,1743,	1.07333	1.00632	0.11524	0	0.212232	0.041902
TU14682	+	Chr03	30042179	30043193	523,70,60,	0,616,954,	0.1471	1.1045	0	0	0	0
TU14725	-	Chr03	30601308	30608262	2921,4003,	0,2951,	4.03681	4.50131	3.55319	0.143553	0	0.039084
TU14713	+	Chr03	30625809	30626032	223,	0,	0.956755	2.94383	1.55818	0.518884	1.87254	0.268449
TU14888	+	Chr03	31548064	31552434	2409,589,521,564,	0,2523,3184,3806,	0.933867	0.460793	2.88668	0.123827	0.092027	0.8273
TU14794	+	Chr03	31589672	31590626	351,127,	0,827,	1.0241	0.904033	0.266839	0.266281	0	0
TU14793	+	Chr03	31591863	31592320	18,344,	0,113,	1.71074	0.428292	0.553903	0	0	0
TU14804	+	Chr03	31743941	31744516	575,	0,	0.137338	0.516237	2.52225	0	0	0
TU14862	+	Chr03	32484481	32486277	81,96,182,	0,176,1614,	0	0	1.12267	0	0	0
TU14872	+	Chr03	32696090	32696320	230,	0,	0.42366	0.330648	6.3564	0	0	0.236617
TU14875	-	Chr03	32707965	32708185	220,	0,	0	0.50402	1.80271	4.8717	7.15585	45.0523
TU14903	-	Chr03	32931405	32932543	549,497,	0,641,	0	0.391198	2.28609	0.074117	0.157632	0.318905
TU15095	-	Chr03	32985726	32985994	268,	0,	0.112006	2.92186	1.29054	0	0.074253	0
TU15211	-	Chr03	33407585	33408337	752,	0,	8.49989	11.5189	6.35811	0	0.275964	0
TU14953	+	Chr03	33421241	33421826	585,	0,	2.10301	0.98631	0	3.14793	1.43788	0.411516
TU15036	+	Chr03	33889984	33890217	233,	0,	3994.09	4853.84	1160.46	1.72573	0.51515	1.57042
TU15050	+	Chr03	33956957	33959288	454,1818,	0,513,	2.33588	3.42238	0	0.210083	0.317953	0
TU15122	-	Chr03	34305414	34305721	307,	0,	7469.73	8617.05	1251.41	1.34651	1.95694	1.65382
TU15123	+	Chr03	34305874	34306814	259,182,	0,758,	0	1.32283	0	0	0.305124	0
TU15134	-	Chr03	34370690	34373731	260,46,296,178,	0,1237,1446,2863,	0.509175	2.67398	0	0.222151	1.28979	0
TU15387	-	Chr03	34424021	34428989	54,180,	0,4788,	2.9248	1.95836	0.653853	0	0	0
TU15407	+	Chr03	34981711	34984760	725,206,	0,2843,	0.805068	1.49036	0.098172	0.401136	0.645986	0
TU15294	-	Chr03	35082911	35084482	667,127,367,	0,978,1204,	1.84588	1.33803	0	0.185537	0.790305	0
TU15283	+	Chr03	35083730	35083996	266,	0,	2.15527	2.46394	0	2.52885	0.336298	0
TU15336	-	Chr03	35289263	35289843	580,	0,	0.24046	0.148038	2.66781	0	0.016338	0.847237
TU15379	-	Chr03	35447290	35451715	2222,2162,	0,2263,	0.849356	2.79163	0.165683	0.032596	0.04323	0
TU15491	+	Chr03	35972831	35973576	745,	0,	0.692405	2.73902	0.391286	0.291996	0.134827	0.128911
TU15495	-	Chr03	36069346	36069640	294,	0,	2.38916	0.650848	0	0.147591	0	0
TU15579	-	Chr03	36274132	36282551	669,109,77,135,	0,3705,7006,8284,	0	0	1.92788	0	0	0.752104
TU15578	-	Chr03	36276566	36282179	1380,1041,	0,4572,	0	0	2.28004	0	0	1.20356
TU15589	-	Chr03	36279163	36279787	624,	0,	0	0	2.16223	0	0	0.15083
TU15694	-	Chr03	36663359	36668019	297,82,47,185,74,75,68,72,84,819,	0,878,1042,1314,1577,1744,2289,2923,3223,3841,	0.286358	0.206542	3.57057	0.057599	0	1.76204
TU15910	-	Chr03	38010381	38012452	2071,	0,	5.10043	4.92416	0.167198	0.30143	0.389993	0
TU15938	+	Chr03	38110435	38111316	881,	0,	0.962934	3.58651	2.29288	0.45411	0.6407	0.369547
TU16282	-	Chr03	39232587	39233133	546,	0,	0.362005	0.61914	4.7837	0	0	0
TU16295	-	Chr03	39253777	39257131	3354,	0,	31.2212	32.3563	1.65412	5.36966	7.31752	0.352199
TU16480	+	Chr03	39547903	39549908	2005,	0,	7.80471	9.0581	6.62733	0.148029	0.174712	0.212834
TU16490	-	Chr03	40160272	40163493	3221,	0,	4.13521	4.72787	4.82513	0.530058	0.697636	0.297667
TU16794	-	Chr03	40203079	40203740	661,	0,	0.378089	0.979488	0.804922	1.35879	1.65932	1.18702
TU16512	-	Chr03	40365918	40367221	542,676,	0,627,	0	0	1.21088	0	0	0.442082
TU16629	-	Chr03	40698957	40699371	245,85,	0,329,	0.284083	0.569438	1.07126	0	0	0
TU16638	-	Chr03	40712389	40714254	1865,	0,	302.43	281.966	92.744	8.75309	8.97506	0.891382
TU16644	-	Chr03	40740286	40741222	758,104,	0,832,	1.95653	2.57272	0.103695	0.076179	0.151704	0
TU16657	+	Chr03	40741454	40743022	999,460,	0,1108,	1.17368	3.32417	0.670876	0.351931	1.17644	0.762911
TU16690	+	Chr03	40891783	40893822	2039,	0,	2.69703	3.30141	5.62031	0.016599	0.030673	0
TU16900	-	Chr03	41597968	41601349	549,259,131,689,	0,1197,1764,2692,	4.96647	5.39081	2.14438	2.36497	1.04023	1.06354
TU16899	-	Chr03	41598984	41601349	440,131,689,	0,748,1676,	7.24269	10.0953	5.99177	4.41961	7.98234	2.82537
TU17076	+	Chr03	41904560	41907072	385,111,951,	0,1331,1561,	0	0	1.08331	0.087103	0	0.11851
TU17003	+	Chr03	41910442	41911495	182,359,	0,694,	0.163896	1.58619	0.725638	0	0.323458	0.769255
TU17135	+	Chr03	42323401	42323786	385,	0,	0	0.262524	2.66785	0	0	0
TU17186	+	Chr03	42452036	42453014	978,	0,	0.188589	0.365849	1.91666	1.06518	0.730789	0.959554
TU17191	-	Chr03	42477392	42478185	793,	0,	277.642	416.178	192.586	85.369	103.113	16.501
TU17185	-	Chr03	42499989	42500781	205,73,	0,719,	1.97515	1.02011	1.14708	3.10089	2.17131	0
TU17228	-	Chr03	42636477	42638196	1719,	0,	0	0.164973	2.41863	0.016323	0	0.182505
TU17297	+	Chr03	42834055	42834456	401,	0,	0.717476	0.43925	3.29238	0.327512	0	0.198783
TU17357	+	Chr03	43000414	43001680	119,317,	0,949,	0.843121	0.822608	2.02703	11.9347	8.00972	64.1124
TU17376	-	Chr03	43102709	43103468	759,	0,	0.901108	1.71433	0.479025	4.93563	5.32981	1.71832
TU17394	-	Chr03	43186565	43186849	284,	0,	0.904107	4.85456	0	0	0	0
TU17518	+	Chr03	43533471	43534134	137,299,	0,364,	1.07614	1.53493	0	1.05759	1.0512	0
TU17610	+	Chr03	43877824	43881693	356,1004,	0,2865,	0.820053	1.33086	0	0	0	0
TU17973	-	Chr03	44933533	44935426	1217,600,	0,1293,	0.93887	1.36553	3.16037	0.248998	0.293964	0.950872
TU18037	-	Chr03	45150012	45150312	300,	0,	1.57631	2.34035	0	0	0	0
TU18086	-	Chr03	45228749	45230891	1663,212,	0,1930,	2.15043	1.87647	0.209371	1.89566	1.85747	0.153662
TU18139	+	Chr03	45418009	45420800	2791,	0,	0.191938	0.294805	2.17735	0	0.058737	0
TU18195	-	Chr03	45657496	45658195	330,276,	0,423,	1.15224	1.28327	0	0	0	0
TU18271	-	Chr03	45733508	45737864	3260,673,	0,3683,	3.09259	3.98774	2.97823	0.766611	0.856219	0.50908
TU18395	+	Chr03	45766956	45769951	264,2669,	0,326,	9.97964	18.2012	1.97415	2.14945	1.74283	1.6e-05
TU18411	+	Chr03	45766956	45769951	245,2669,	0,326,	2.69853	3.20209	0.730568	0.253199	0.738483	0.208319
TU18310	+	Chr04	167000	168672	1672,	0,	0.208533	0.230061	2.30408	0	0	0.152406
TU18440	+	Chr04	447076	447571	495,	0,	6.26476	8.23579	0.45144	4.83181	5.48717	1.06516
TU18472	+	Chr04	515516	516083	567,	0,	0.153937	0.115954	2.65796	0	0.189409	5.56132
TU18482	-	Chr04	548378	549673	1295,	0,	0.077385	0	3.7397	0	0.111469	0.674619
TU18488	+	Chr04	602704	603482	113,212,158,	0,310,620,	0	0	1.15706	0	0	0
TU18556	+	Chr04	772036	773246	233,896,	0,314,	1.41558	1.79294	0.478376	0.591252	1.12579	0.446011
TU18886	-	Chr04	1925131	1926817	1686,	0,	8.93216	7.32234	2.22333	1.27361	1.05758	0.267913
TU18952	-	Chr04	2152192	2153458	110,224,	0,1042,	0.562745	0	0	0	1.05069	0
TU18994	+	Chr04	2298933	2299334	401,	0,	3.55974	3.3892	1.86357	0.592262	0.125245	0.276221
TU19182	-	Chr04	2957454	2958320	866,	0,	1.31077	0.38016	0.102286	1.84323	0.674046	0
TU19247	+	Chr04	3128506	3130335	1829,	0,	0.050751	0	3.71178	0.081611	0	0.119545
TU19477	-	Chr04	3176266	3177688	82,148,589,	0,351,833,	1.43464	0.977831	2.31655	1.34179	1.39883	0.265829
TU19478	-	Chr04	3176266	3177688	82,1071,	0,351,	3.43601	3.51153	7.02183	0.115934	0.382047	0.652621
TU19479	-	Chr04	3176266	3177688	499,589,	0,833,	4.50101	3.87626	2.12643	0.128437	0.593259	0.114866
TU19404	-	Chr04	3751115	3752059	10,72,157,	0,98,787,	0	0	0	0	0	1.28052
TU19652	-	Chr04	4463539	4465568	266,108,77,131,199,106,	0,559,817,1375,1606,1923,	7.17447	10.5368	42.3763	0.724003	0.810749	0.819393
TU19700	-	Chr04	4785442	4785927	336,55,	0,430,	1.40315	1.78813	0	0	0.161569	0
TU19827	-	Chr04	5042259	5048146	472,150,4709,	0,590,1178,	1.31151	0.832693	29.0868	0.272563	0.141767	7.16803
TU19829	-	Chr04	5042259	5048146	472,5297,	0,590,	1.21831	1.19223	42.2702	0.105855	0.084996	4.34736
TU19868	+	Chr04	5343198	5348357	1376,3343,286,	0,1451,4873,	0	0.020096	3.06333	0	0	0.443895
TU19914	+	Chr04	5497103	5497358	255,	0,	0	0	2.29897	0	0	0
TU19957	+	Chr04	5571927	5575158	138,613,87,122,67,466,	0,444,1165,1350,1940,2765,	0.635735	0.677524	2.11198	0.69397	0.736329	1.2134
TU19996	-	Chr04	5743522	5748968	1160,4148,	0,1298,	12.2872	15.5045	53.4526	2.49979	3.40653	8.40941
TU20084	+	Chr04	6109062	6109986	116,719,	0,205,	4.07942	3.49617	0	5.05248	6.50991	0
TU20083	+	Chr04	6111091	6111393	302,	0,	2.30293	2.30698	0	0.477979	0.47171	0
TU20165	-	Chr04	6345016	6348425	1624,1020,	0,2389,	36.6234	36.7912	13.6252	3.3177	2.62212	2.81723
TU20293	-	Chr04	6860632	6861162	530,	0,	0	0.806509	0	2.25456	0	0
TU20288	+	Chr04	6860668	6863122	2454,	0,	1.68296	3.32314	0.897356	0.51538	1.72302	0.110754
TU20341	+	Chr04	7269583	7269932	349,	0,	0	0	2.93728	0	0	0.42745
TU20455	-	Chr04	7685968	7691847	2942,536,	0,5343,	1.02506	0.785333	2.48933	0.26208	0.152212	0.224587
TU20460	-	Chr04	7756854	7757936	480,435,	0,647,	1.09421	0.1673	12.784	0	0	1.48554
TU20537	+	Chr04	8210739	8213098	2359,	0,	3.55568	3.7972	0.771989	1.13246	1.44919	0
TU20594	-	Chr04	8331118	8332355	295,79,247,	0,480,990,	1.45162	0.786919	0	0	0	0
TU20653	-	Chr04	8370070	8371327	226,820,	0,437,	1.01233	0.78879	0.912671	0.344312	0.315566	0.088449
TU20686	-	Chr04	8981439	8982165	726,	0,	1.09855	2.54443	1.60167	0	0.509043	0.132285
TU20691	-	Chr04	8982467	8982834	367,	0,	0	0.220587	0.103128	2.13924	4.9902	1.68874
TU20779	-	Chr04	9372043	9372947	904,	0,	2.09603	5.45456	5.27702	2.79646	2.91735	0
TU20765	+	Chr04	9372224	9373113	889,	0,	0	0	0	0	0.56873	1.73136
TU20835	+	Chr04	9597086	9600801	330,230,116,546,	0,1034,1382,3169,	2.70661	2.3697	0	2.47187	1.63807	0.197185
TU20838	+	Chr04	9597086	9599837	330,230,1369,	0,1034,1382,	4.23817	3.18495	0.645386	0.77396	1.23756	0.054152
TU20832	+	Chr04	9822032	9822282	250,	0,	0	0	2.89093	0	0	0
TU20841	+	Chr04	9823536	9823770	234,	0,	0	0	3.51876	0	0	0
TU20845	+	Chr04	9824448	9825126	678,	0,	0	0	1.99477	0	0	0.075074
TU20940	-	Chr04	10842959	10852355	159,52,	0,9344,	1.33728	2.74851	0	0	0	0
TU20861	+	Chr04	11078063	11078492	429,	0,	1.03557	2.63618	1.34212	0	0	0
TU20925	+	Chr04	11707670	11708372	11,298,	0,404,	0	0	1.46591	0	0	0
TU20949	+	Chr04	12327285	12327718	433,	0,	0	0	36.9318	0	0	0.074672
TU21004	-	Chr04	12384698	12388660	1981,1013,105,	0,2542,3857,	1.86941	1.62899	0.922856	0.226966	0.148365	0.135059
TU21006	-	Chr04	12384698	12388660	1981,105,22,881,	0,2542,2755,3081,	0.723944	0	1.11774	0.350313	0.506396	0
TU21008	-	Chr04	12384698	12388660	2777,881,	0,3081,	0.701775	2.07656	0.208375	0.278829	0.325146	0.043733
TU21009	-	Chr04	12384698	12388660	3555,112,	0,3850,	0.645922	0.032905	1.87936	0	0	0.027921
TU20966	+	Chr04	12507715	12508836	260,107,	0,1014,	0.546119	0.221924	1.49535	0.209667	0	0.317512
TU21024	+	Chr04	12947405	12948750	891,60,163,	0,980,1182,	4.31921	7.05084	0.108068	0.795644	1.29693	0
TU21084	+	Chr04	13602922	13603604	209,352,	0,330,	0.262112	0.474058	0.362794	0.708867	0.947032	1.04586
TU21088	-	Chr04	13603146	13603562	416,	0,	0.741105	2.69375	1.03419	0.992504	0.753236	1.03904
TU21085	-	Chr04	13648970	13649701	731,	0,	2.80118	4.33991	0.906068	0.90424	1.19909	0.162035
TU21189	+	Chr04	13671592	13686373	1832,12449,	0,2332,	0.396295	0.448373	5.05188	0	0.02632	0.036068
TU21095	+	Chr04	13988307	13988969	662,	0,	13.8187	23.212	15.9601	0.289278	0.12358	0.145073
TU21138	-	Chr04	14796568	14797069	147,243,	0,258,	0	1.0165	0	0	0	0
TU21163	+	Chr04	15291096	15291928	832,	0,	0.144316	0.137992	2.19127	0.252075	0.214881	0
TU21253	-	Chr04	15329668	15338832	593,54,279,7934,	0,675,814,1230,	8.99742	9.46527	2.95485	0.432042	0.393207	0.486358
TU21254	-	Chr04	15329668	15338832	593,54,279,2096,5753,	0,675,814,1230,3411,	1.25002	2.24719	1.45186	0.845168	0.874264	0
TU21257	-	Chr04	15329668	15338832	593,54,2512,5753,	0,675,814,3411,	1.35706	2.24884	1.21518	0	0.220507	0
TU21210	+	Chr04	15476871	15504020	368,17789,	0,9360,	4.11191	9.00334	0.72751	0.084854	0.111111	0.014352
TU21211	+	Chr04	15476871	15485211	368,564,303,	0,2004,8037,	1.57809	5.33003	0.601319	0	0	0
TU21221	+	Chr04	15480131	15481022	891,	0,	1.15945	2.88326	0.47765	0	0	0
TU21212	+	Chr04	15483131	15485211	2080,	0,	1.9851	4.31726	0.507799	0.139632	0.216855	0
TU21243	-	Chr04	15589041	15591523	550,57,128,70,243,	0,1454,1821,2071,2239,	0.262468	1.76477	0.222449	1.27191	0.683655	0
TU21247	-	Chr04	15589041	15591953	1511,320,136,31,	0,1821,2239,2881,	1.4648	1.06906	0	0.452923	0.570514	0
TU21252	-	Chr04	15589041	15591953	550,57,128,70,136,31,	0,1454,1821,2071,2239,2881,	0	0	0	1.04099	0	0
TU21285	+	Chr04	15716445	15730714	2613,5107,2380,	0,3571,11889,	1.61331	1.44377	4.20471	0	0	0.364045
TU21286	+	Chr04	15716445	15730714	268,104,81,120,94,49,1800,	0,615,2532,3571,8584,11889,12469,	0	0	1.59184	0	0.115058	0
TU21290	+	Chr04	15716445	15728047	2613,8031,	0,3571,	0.502334	1.93224	1.04667	0.116623	0.013258	0.062691
TU21319	+	Chr04	17145570	17151470	319,124,	0,5776,	0	0	1.30772	0	0.375762	0.013153
TU21318	+	Chr04	17149721	17151470	368,124,	0,1625,	0	0.272245	1.39873	0	0	0.238013
TU21327	+	Chr04	17151658	17156559	176,289,570,	0,3944,4331,	0	0	1.07084	0	0	0.034642
TU21362	-	Chr04	17895187	17898053	773,761,	0,2105,	5.74041	5.11845	3.30324	3.68669	4.15591	1.79139
TU21370	+	Chr04	17970208	17971667	1459,	0,	5.82818	5.54029	1.19383	3.28377	3.89823	1.07953
TU21427	-	Chr04	18092632	18095316	1070,1541,	0,1143,	0.454457	2.15206	2.88765	0.993415	0.845754	1.1577
TU21428	-	Chr04	18092632	18095316	912,1217,409,	0,1005,2275,	1.14716	0	0	0	0	0
TU21429	-	Chr04	18092632	18095316	2684,	0,	3.3385	2.96988	8.4668	1.31366	2.4143	1.76615
TU21387	-	Chr04	18123490	18127689	4199,	0,	7.79677	8.01299	0.221886	0.372499	0.396509	0.017306
TU21431	+	Chr04	18431355	18437916	170,255,	0,6306,	0	0.456	2.73683	0	0	0
TU21424	-	Chr04	18446009	18447981	1972,	0,	0	0.115693	1.96132	0	0	0.121428
TU21466	+	Chr04	18459911	18460959	71,77,100,113,	0,176,334,935,	0.418316	0	2.22175	0	0	0
TU21425	+	Chr04	18572938	18573231	293,	0,	2.38628	1.22911	0.277585	0	0	0
TU21470	-	Chr04	18712554	18716371	1487,498,	0,3319,	0	0	2.07586	0	0.025301	0.953129
TU21468	-	Chr04	18797792	18798180	388,	0,	0.552268	0.20359	0	2.50061	2.27295	0.108085
TU21500	+	Chr04	19351042	19351363	321,	0,	2.35653	1.23295	2.41832	0	0	0.125658
TU21507	-	Chr04	19606928	19617415	2023,450,	0,10037,	0.096172	0.452348	1.34207	0	0	0
TU21518	-	Chr04	19613244	19615335	2091,	0,	0.40505	0.396078	2.24983	0	0	0
TU21509	-	Chr04	19618376	19618879	242,16,	0,487,	0	0	1.05653	0	0	0
TU21532	-	Chr04	20289069	20289429	360,	0,	0.277086	0.128111	4.89874	0	0	0.215198
TU21573	+	Chr04	21259573	21268448	79,241,	0,8634,	0	1.1576	2.30509	0	0	0
TU21572	-	Chr04	21404723	21405092	220,128,	0,241,	0.317163	0	2.36491	0	0	0
TU21575	-	Chr04	21747929	21748486	29,456,	0,101,	0	0	1.11078	0	0	0
TU21660	+	Chr04	21757839	21759103	234,871,	0,393,	3.56814	2.30307	1.94076	0.169122	0.066256	0.146198
TU21662	-	Chr04	21801129	21808110	5175,417,	0,6564,	3.77201	3.63149	17.0759	0.067434	0.360626	1.00057
TU21663	-	Chr04	21801129	21808110	6444,417,	0,6564,	1.14536	0.984347	21.7098	0	0	0.377152
TU21671	-	Chr04	21801129	21808110	5175,87,417,	0,6357,6564,	0	0.851975	7.45844	0.054021	0	0.141668
TU21589	+	Chr04	21825776	21826206	430,	0,	0.560616	0.419896	2.61432	0	0	0
TU21593	+	Chr04	22164821	22165144	323,	0,	2.70938	4.24562	9.95745	0	0	0.4906
TU21606	+	Chr04	22412965	22413574	396,49,	0,560,	0	0	3.38395	0	0	0
TU21603	+	Chr04	22420829	22421127	298,	0,	0	0	2.00372	0	0	0
TU21612	-	Chr04	22469493	22475177	182,54,	0,5630,	0	0	1.0083	0	0	0
TU21738	-	Chr04	22653638	22680573	10358,16416,	0,10519,	0	0.090726	1.12075	0.037691	0	0
TU21742	-	Chr04	22653638	22680573	26935,	0,	4.04555	5.01036	6.96724	0.037849	0.055551	0.076279
TU21633	+	Chr04	22834069	22835093	1024,	0,	2.44886	1.79342	1.02271	0.063279	0	0
TU21646	+	Chr04	22854393	22855785	187,1046,	0,346,	0.247572	0.148027	3.88496	0.070384	0.115024	0.507325
TU21635	-	Chr04	22954589	22957606	309,56,846,1384,	0,532,659,1633,	0.79353	1.47437	6.20013	0.101665	0.217517	0.451264
TU21618	-	Chr04	22957908	22964887	3265,150,	0,6829,	0.815977	1.42048	3.94076	0.041253	0	0.088399
TU21619	+	Chr04	23116351	23130072	158,106,	0,13615,	0	0	1.27044	0	0	0
TU21637	-	Chr04	23710717	23711981	1264,	0,	0	0	4.01107	0	0	0.159305
TU21670	+	Chr04	25352392	25352695	303,	0,	0.249957	0.500355	2.35203	0	0	0
TU21682	+	Chr04	26313311	26314886	176,54,	0,1521,	0	1.20527	0	0	0.237588	0
TU21689	+	Chr04	26522262	26523497	173,609,	0,626,	0	0.09474	1.9066	0	0	0
TU21690	-	Chr04	26528191	26533232	5041,	0,	0.589607	0.997143	2.39169	0.010559	0.02262	0.138187
TU21695	-	Chr04	26534545	26538076	2971,450,	0,3081,	0.829903	0.74549	2.5007	0.16481	0.235539	0.099847
TU21698	+	Chr04	26538238	26538776	211,56,50,	0,296,488,	3.42105	2.96637	13.2643	20.7046	21.9218	13.5122
TU21699	+	Chr04	26538238	26538776	352,50,	0,488,	5.31391	6.66322	14.8934	5.00856	4.68432	3.23619
TU21703	-	Chr04	26936017	26936420	403,	0,	0	1.57905	5.38113	0	0	0.220039
TU21730	+	Chr04	27855745	27856361	616,	0,	1.50163	3.25765	5.92566	0.130081	0.61943	0.240097
TU21747	-	Chr04	27988847	28242823	72,135,	0,253841,	1.06417	0.459826	0	0	0	0
TU21787	+	Chr04	29227226	29227654	53,275,	0,153,	1.32911	0.770363	1.12075	0	0	0
TU21754	-	Chr04	29482063	29482340	277,	0,	1.17703	2.38766	0.885218	0	0	0
TU21763	+	Chr04	29688501	29697002	26,181,	0,8320,	0	0	1.03479	0	0	0
TU21768	+	Chr04	29861638	29862034	396,	0,	3.25483	2.80631	2.93741	0	0	0
TU21770	-	Chr04	29864160	29864752	592,	0,	0.138855	0.241176	2.58653	0	0	0.140597
TU21788	-	Chr04	30739898	30742189	2291,	0,	0.52833	0.506058	2.94973	0.106317	0.083413	0.168518
TU21790	-	Chr04	31587032	31587386	354,	0,	0.236123	0	2.10531	0	0	0
TU21814	-	Chr04	31738990	31747718	288,371,	0,8357,	0.593556	1.73548	0.340316	0	0	0
TU21813	+	Chr04	31773771	31812147	275,165,	0,38211,	0.551991	1.60738	1.13383	0	0	0
TU21815	+	Chr04	31811832	31812147	315,	0,	0.541092	1.859	1.24363	0	0.149411	0
TU21825	+	Chr04	31952621	31952916	28,225,	0,70,	0	1.01618	0	0	0	0
TU21833	+	Chr04	32208752	32209282	165,56,	0,474,	0	2.25561	2.30104	0	0	0
TU21836	+	Chr04	32209330	32209689	232,24,	0,335,	0	0.044081	1.05692	0	0	0
TU21854	+	Chr04	32480604	32578413	109,98,	0,97711,	0	0.621002	1.65139	0	0	0
TU21840	-	Chr04	32873493	32873825	332,	0,	1.19069	2.71182	3.1277	0	0.14176	0
TU21867	+	Chr04	33057524	33058029	505,	0,	0.791021	2.00045	3.68352	0	0	0
TU21884	+	Chr04	33067945	33068145	200,	0,	0.674243	2.5366	0.571743	0	0	0
TU21879	+	Chr04	33557591	33558211	297,243,	0,377,	2.1859	1.47192	0	0.115711	0	0
TU21891	-	Chr04	33749461	33749671	210,	0,	29.5998	38.2511	2.48867	26.8436	29.8044	21.9029
TU21929	+	Chr04	33753226	33825031	71805,	0,	0.255277	0.275292	9.07412	0.008714	0.003691	0.091801
TU21930	+	Chr04	33753226	33825031	1088,28100,38301,	0,2009,33504,	0	0	1.09258	0	0	0.001404
TU21931	+	Chr04	33753226	33825031	1088,44868,	0,26937,	0	0	1.27015	0	0.004756	0
TU21897	+	Chr04	33825562	33840526	1353,7014,	0,7950,	0.014792	0.052483	2.76037	0	0	0.064584
TU21892	+	Chr04	33842098	33842618	520,	0,	3.72912	1.71535	6.75344	0.59747	0.134851	1.69484
TU21899	+	Chr04	34253925	34254323	398,	0,	0.418878	2.91302	0	0	0	0
TU21901	+	Chr04	34604799	34607591	2792,	0,	0.47008	0.134082	4.63363	0.040304	0.053625	0.102161
TU21932	-	Chr04	34701807	34710690	51,219,	0,8664,	1.32728	0	0	0	0	0
TU21917	+	Chr04	35234608	35237021	2413,	0,	2.71383	7.29574	12.5663	0.037883	0.281179	0.516611
TU22000	-	Chr04	35975759	35982502	424,524,228,	0,5202,6515,	0.792067	0.262425	1.01241	0	0	0
TU21947	-	Chr04	36070128	36070740	347,164,	0,448,	0.428372	1.03601	1.09523	0	0	0
TU21956	-	Chr04	36070826	36071587	410,269,	0,492,	0.325103	0	1.04306	0	0	0
TU21957	-	Chr04	36072596	36073101	505,	0,	1.02513	3.4063	1.63366	0.227985	0.592956	0.46593
TU21968	-	Chr04	36351152	36367938	1326,14335,	0,2451,	0.069356	0.178229	3.67749	0	0	0.020747
TU22131	+	Chr04	36370970	36401224	14797,4336,10511,	0,14882,19743,	14.8157	15.391	20.4583	0.289918	0.22623	0.322202
TU21981	-	Chr04	36867030	36867483	453,	0,	0.582105	1.01702	4.17302	0	0	0
TU22019	-	Chr04	36991998	36992690	22,605,	0,87,	1.78242	0.663575	0.520794	0	0	0
TU21983	+	Chr04	37020504	37022251	1747,	0,	0.079039	0.052799	2.20793	0	0	0
TU21986	-	Chr04	37036099	37037632	1533,	0,	13.3832	13.5788	2.52219	1.34921	1.81835	0.332658
TU22022	-	Chr04	37576883	37577554	671,	0,	0.317279	0.710001	1.99038	0	0	0
TU22055	+	Chr04	37593841	37888205	53,122,165,	0,168269,294199,	0	0	1.95051	0	0	0
TU22034	+	Chr04	37897039	37951431	137,65,	0,54327,	0	0	1.06439	0	0	0
TU22033	-	Chr04	38022841	38023206	365,	0,	2.37105	2.69784	0	0	0	0
TU22035	+	Chr04	38118472	38174395	193,47,	0,55876,	0	0	1.02504	0	0	0
TU22036	+	Chr04	38541016	38542041	319,122,	0,903,	0	0	1.2143	0.139063	0	0.450068
TU22100	-	Chr04	38545795	38552288	114,2332,	0,4161,	0.666159	1.24148	0	0.340567	0.513104	0.312331
TU22098	-	Chr04	38548948	38552288	1121,78,	0,3262,	0	2.7195	0	0	0	0
TU22101	-	Chr04	38548948	38552288	1121,1745,	0,1595,	1.31754	0	0.680098	0.234906	0.213774	0.12729
TU22233	-	Chr04	38572389	38573886	832,625,	0,872,	0.310937	0.162985	1.26815	0	0	0
TU22250	-	Chr04	38592874	38599760	933,5881,	0,1005,	0.695697	1.02736	3.78256	0.080555	0	0.387165
TU22251	-	Chr04	38592874	38599760	2059,4755,	0,2131,	0	0	1.00523	0.049862	0.084553	0.182292
TU22257	-	Chr04	38601091	38605802	702,102,	0,4609,	0.317638	0.291698	1.75978	0.073399	0.072288	0.538326
TU22263	-	Chr04	38601921	38603755	1834,	0,	0.237704	0.588018	2.19869	0	0.094726	0
TU22135	+	Chr04	38891799	38908953	5978,10974,	0,6180,	10.6772	16.3764	0.680769	0.181452	0.320981	0.012307
TU22136	+	Chr04	38891799	38908953	1092,35,10974,	0,5943,6180,	5.95169	5.67955	1.05278	0.084214	0.142459	0.008659
TU22138	+	Chr04	38891799	38908953	270,159,35,10974,	0,933,5943,6180,	1.23313	6.87549	0	0.089639	0.13267	0
TU22140	+	Chr04	38891799	38908953	270,35,10974,	0,5943,6180,	3.7689	2.23212	0.366162	0.017789	0.024862	0
TU22081	+	Chr04	38922530	38923752	98,885,	0,337,	3.28764	5.11552	0.628325	0.369616	1.05139	0
TU22109	+	Chr04	38924067	38951070	21849,164,	0,26839,	0	2.96565	0	0	0	0
TU22111	+	Chr04	38924067	38950793	26726,	0,	4.02255	3.74595	0.451658	0.105045	0.194915	0.010134
TU22113	+	Chr04	39627686	39629661	1975,	0,	0.129073	0.219608	4.90951	0	0	0.413493
TU22120	+	Chr04	39659113	39659463	54,202,	0,148,	2.60227	2.0429	1.55608	0	0	0
TU22115	+	Chr04	39732750	39734553	1803,	0,	0.109625	0.074562	2.2662	0	0	0.149145
TU22158	-	Chr04	40065284	40074409	348,8678,	0,447,	0.395501	0.540105	7.839	0.03471	0.026177	0.625822
TU22167	-	Chr04	40131760	40133614	1854,	0,	0.207241	1.0829	2.47054	0	0.043615	0
TU22175	+	Chr04	40366855	40372637	157,274,	0,5508,	0	0.291423	2.01692	0	0	0
TU22176	+	Chr04	40367976	40371720	3744,	0,	0.410745	0.321064	7.46812	0	0.019235	0.079434
TU22266	+	Chr04	40486346	40492529	409,107,1377,193,256,	0,3477,4204,5654,5927,	0.960458	3.2643	3.33483	0.20063	1.76126	0.805462
TU22268	+	Chr04	40486346	40490063	409,240,	0,3477,	4.96523	2.11979	0.602338	0.684247	0.141483	0.038994
TU22274	+	Chr04	40486346	40492529	409,107,129,817,56,256,	0,3477,4204,4764,5654,5927,	0	0	1.55462	0	0.153767	0.240298
TU22277	+	Chr04	40487799	40488296	497,	0,	2.19848	2.71283	1.97186	0.127468	0.922818	0.298229
TU22269	+	Chr04	40490250	40492529	1943,256,	0,2023,	3.56078	3.54833	2.72413	1.09866	0.71647	0.393897
TU22222	+	Chr04	40880079	40880824	230,435,	0,310,	0	0	1.38834	0	0	0.752423
TU22235	+	Chr04	41166893	41167445	96,378,	0,174,	0.355613	0.545499	41.514	0.460159	0	2.24563
TU22253	+	Chr04	41196909	41197298	389,	0,	0.78116	0.418746	24.7989	0	0.236292	2.29768
TU22254	+	Chr04	41198167	41200518	1210,1058,	0,1293,	0.286697	0	8.7252	0	0	2.55722
TU22249	+	Chr04	41387775	41388316	541,	0,	1.74993	2.10948	0.136941	0.089831	0.189754	0
TU22298	+	Chr04	42132751	42137133	4382,	0,	0.000949	0	2.39964	0	0	0
TU22317	+	Chr04	42137657	42152938	1452,968,12685,	0,1550,2596,	0.01492	0.016371	2.77624	0	0	0
TU22306	+	Chr04	42158026	42158956	930,	0,	0.037739	0.083884	2.19112	0	0.060457	0.103267
TU22369	+	Chr04	43343201	43343700	499,	0,	1.9694	1.6843	3.40425	0	0.167746	0.191179
TU22386	+	Chr04	43653222	43653425	203,	0,	3.54434	4.20789	2.56259	80.325	245.932	26.2361
TU22410	+	Chr04	43709235	43709599	364,	0,	0.847498	0.390893	2.91137	0	0.130165	0
TU22552	-	Chr04	44351053	44356126	662,70,105,168,239,326,271,	0,933,1096,1273,1523,1849,4802,	0.506602	0.417792	0.057475	1.64117	0.645597	0.333246
TU22554	-	Chr04	44351053	44356126	1441,3550,	0,1523,	0.592339	1.42207	0.827774	0.017016	0.109184	0.018806
TU22555	-	Chr04	44351053	44356126	662,268,489,326,271,	0,933,1273,1849,4802,	1.44785	0.059129	0.031243	0.185144	0.041982	0.022312
TU22557	-	Chr04	44351053	44356126	662,4140,	0,933,	1.58986	1.14163	0.438776	0.055802	0.176228	0.013659
TU22559	-	Chr04	44351053	44356126	1003,3977,	0,1096,	1.18647	0.504267	0.393511	0.041409	0	0
TU22561	-	Chr04	44351053	44356126	662,268,168,239,326,271,	0,933,1273,1523,1849,4802,	1.16318	0.192955	0.033164	0.188078	0.024626	0.024781
TU22562	-	Chr04	44351053	44356126	1201,168,3550,	0,1273,1523,	1.28669	2.45396	0.475269	0.074536	0.038686	0.025044
TU22565	-	Chr04	44351053	44356126	662,70,105,168,239,343,271,	0,933,1096,1273,1523,1849,4802,	0	0.354931	0.034178	0.150771	1.00964	0
TU22566	-	Chr04	44351053	44356126	1003,105,3800,	0,1096,1273,	1.26768	0.437372	0.183267	0.046451	0.49086	0.009641
TU22519	+	Chr04	44551774	44552016	242,	0,	1.58199	2.69649	0.274524	0	0	0
TU22525	+	Chr04	44640934	44643108	2174,	0,	0.086881	0.091628	2.99829	0	0	0.085701
TU22570	+	Chr04	45024815	45025233	177,148,	0,270,	0.19325	1.15489	0	0	0.155504	0
TU22594	+	Chr04	45097305	45099487	1818,278,	0,1904,	0.356713	0.493734	9.5096	0.084842	0.037072	1.0179
TU22595	+	Chr04	45097305	45099487	151,1875,	0,307,	0	0.072113	5.58684	0.146533	0	1.24668
TU22597	+	Chr04	45097305	45099487	151,1511,278,	0,307,1904,	0	0	0.346774	0	0	1.15108
TU22622	+	Chr04	45430172	45434409	150,3998,	0,239,	24.1044	29.3713	0.036885	1.3028	1.59076	0.021146
TU22855	+	Chr04	45528612	45529615	1003,	0,	125.292	47.1253	4.74412	0.60682	0.38893	0
TU22856	+	Chr04	45530017	45530963	946,	0,	2.93245	0.673721	0	0.295088	0	0
TU22632	+	Chr04	45652233	45654681	2448,	0,	294.256	387.763	249.77	9.51071	7.58638	5.59885
TU22850	+	Chr04	46473410	46474190	780,	0,	2.56541	1.27252	1.42161	0.152798	0.357174	0.176892
TU22854	+	Chr04	46474761	46476231	21,156,266,	0,945,1204,	0.835011	0.789674	1.217	0.168473	0.621041	0.355538
TU22895	+	Chr04	46628882	46631906	216,2153,	0,871,	12.5115	13.8403	5.70379	1.05051	0.704309	0.472531
TU22897	+	Chr04	46628882	46631906	967,613,	0,2411,	3.26949	2.28991	3.16233	0.17556	0.18082	0.057465
TU22935	-	Chr04	46825375	46826862	1487,	0,	4.96904	4.72426	4.89093	2.64688	4.2554	3.69343
TU22993	+	Chr04	47100752	47103393	2641,	0,	0.26544	0.069713	3.74127	0.010057	0.123277	1.44674
TU23089	-	Chr04	47520031	47521843	1004,703,	0,1109,	1.64001	1.5705	0	0.2442	0.248328	0
TU23118	-	Chr04	47569169	47570808	1639,	0,	0	0	2.51604	0	0	0.542988
TU23130	-	Chr04	47571155	47577252	218,100,239,	0,5239,5858,	0	0	5.15994	0	0	0.668998
TU23131	-	Chr04	47576230	47577252	264,239,	0,783,	0	0	25.097	0.323209	0	25.2278
TU23178	+	Chr04	47760260	47764321	410,135,2340,	0,1510,1721,	2.43482	2.68188	0.07327	0.228854	0.239994	0
TU23751	+	Chr04	49554907	49556181	410,777,	0,497,	0.850477	1.56823	2.50435	0.130382	0.117087	0.243265
TU23750	-	Chr04	49658194	49659024	208,306,	0,524,	1.31984	2.07424	0	0.765967	0	0
TU23826	-	Chr04	49877256	49879852	2596,	0,	0.373575	0.947447	2.40977	0	0.071788	0.207664
TU23852	-	Chr04	49983861	49986126	1520,535,	0,1730,	0	0.685729	1.67996	0.558292	1.26756	1.33906
TU23854	-	Chr04	49983861	49986126	1808,143,	0,2122,	1.07033	2.15491	2.36375	0.457706	0	0.312119
TU23855	-	Chr04	49983861	49986126	1584,535,	0,1730,	1.06009	0	0	0	0.835564	0
TU23937	+	Chr04	50059253	50060320	548,265,	0,802,	6.68574	13.6003	6.7522	0	1.36643	0.568593
TU23915	+	Chr04	50168625	50169828	1203,	0,	1.72747	2.82637	0.733647	0.163515	0.522508	0.277817
TU24066	+	Chr04	50768708	50773125	529,56,1478,812,	0,1298,1452,3605,	4.54453	3.28668	27.6394	1.155	0.79445	5.30322
TU24100	-	Chr04	50844106	50844647	125,142,97,	0,226,444,	0	1.72128	0	0	0	0
TU24154	-	Chr04	50961089	50961456	30,258,	0,109,	0	0	1.03315	0.242069	0	0
TU24196	-	Chr04	51013082	51016089	3007,	0,	23.9889	22.5934	0.119706	2.42986	2.34774	0
TU24194	-	Chr04	51016155	51017686	1032,354,	0,1177,	21.3181	23.7938	0.183597	2.93437	3.83303	0.217808
TU24195	-	Chr04	51016155	51017686	1032,229,	0,1302,	6.6321	0.667308	0	0.083666	0	0
TU24185	-	Chr04	51067489	51068250	90,444,	0,317,	6.77408	8.43733	5.20938	5.86519	13.4208	4.93802
TU24395	-	Chr04	51159881	51160319	438,	0,	0	0.328213	1.32557	8.40689	2.63656	1.8835
TU24218	-	Chr04	51238657	51239481	824,	0,	0.714012	1.12537	0	2.14079	3.24033	0
TU24223	+	Chr04	51288408	51289650	207,331,	0,911,	0.954522	1.87957	3.263	0.101624	0.325262	0.219568
TU24606	+	Chr05	206372	210117	333,1416,	0,2329,	0	0	3.03042	0	0	2.38672
TU24607	+	Chr05	206372	210117	333,3011,	0,734,	0.030659	0	16.6864	0	0	3.3699
TU24805	-	Chr05	950029	950497	468,	0,	2.20445	0.918375	0.099799	1.24735	1.63603	0.117654
TU24871	-	Chr05	1232892	1234082	1190,	0,	0.966309	2.21818	3.49549	2.84149	2.00404	1.6523
TU24924	-	Chr05	1244874	1258042	390,6103,80,200,	0,606,12426,12968,	0.274412	1.90487	0	0.046045	0	0
TU24926	-	Chr05	1244874	1254313	390,8833,	0,606,	13.4453	24.336	0.077842	0.661144	1.06635	0.010413
TU24922	-	Chr05	1254518	1258042	2862,200,	0,3324,	31.2762	55.718	0.027351	0.988868	1.97608	0
TU25116	+	Chr05	1968409	1968622	213,	0,	2.41095	2.19751	1.60487	0.207791	0.465646	0
TU25151	+	Chr05	2134683	2135306	623,	0,	4.32752	3.3187	5.29889	0.481046	0.229169	0
TU25192	-	Chr05	2231019	2233150	2131,	0,	65.2505	53.4766	21.5164	15.7775	18.2011	6.27314
TU25294	-	Chr05	2555700	2558443	442,1049,	0,1694,	0.394644	1.79722	0	1.14374	0.898406	0.501252
TU25295	-	Chr05	2556210	2558443	2233,	0,	1.60234	1.79566	5.73121	0.187442	0.3995	0.453516
TU25355	-	Chr05	2740762	2741957	304,352,355,	0,402,840,	0.443434	1.01914	0.163497	0.116288	0.283493	0.532914
TU25364	-	Chr05	2901919	2902452	533,	0,	0.259931	0.057993	2.41506	0.158478	0	0
TU25402	-	Chr05	3055371	3057410	397,476,	0,1563,	0.652247	0.119709	1.4874	0.769087	0.485923	0.92885
TU25449	-	Chr05	3238652	3238882	230,	0,	3.91936	3.34914	0.245083	0.188659	0	0.296467
TU25554	-	Chr05	3515864	3517458	446,203,744,	0,540,850,	2.87496	2.89945	1.76547	0.966682	1.16778	0.477321
TU25632	+	Chr05	3888225	3889521	245,937,	0,359,	2.79508	3.21655	0.596119	0.569255	0.837772	0
TU25813	+	Chr05	4592096	4593688	1592,	0,	0.695036	0.763079	7.55524	0.082677	0	0.400965
TU25836	+	Chr05	4679982	4680798	683,43,	0,773,	2.60611	1.23065	0	0.260191	0.335447	0
TU25837	+	Chr05	4696934	4697250	197,31,	0,285,	0	0.512158	0	0.631844	1.22884	0
TU25892	-	Chr05	4757701	4764867	1432,970,4596,	0,1505,2570,	5.25949	3.85915	3.65211	0.273918	0.247575	0.415924
TU25894	-	Chr05	4757701	4764867	1153,192,970,741,257,	0,1240,1505,2570,6909,	0.480033	0.916742	0.279036	3.10065	2.19909	2.87693
TU25897	-	Chr05	4757701	4764867	2475,4596,	0,2570,	4.39068	3.10404	3.08658	0.173324	0.419742	0.23921
TU25899	-	Chr05	4757701	4764867	1153,192,970,4596,	0,1240,1505,2570,	1.77791	4.00233	3.56469	0.191262	0.280913	0.221887
TU25901	-	Chr05	4757701	4764867	6237,257,	0,6909,	2.15969	2.25256	2.78766	0.165927	0	0
TU25903	-	Chr05	4757701	4764867	2475,741,257,	0,2570,6909,	1.41442	0.821171	0.316687	0.263538	0.326896	0.833998
TU25886	-	Chr05	4787179	4788771	1176,181,	0,1411,	0.80485	0	3.74255	0.134633	0.114424	0.674808
TU25977	+	Chr05	5263743	5265378	1635,	0,	0	0.056416	2.06292	0	0	1.02657
TU26088	-	Chr05	5686779	5692444	427,3669,	0,1996,	2.42937	0	0.482382	0	0	0
TU26128	-	Chr05	6000519	6000728	209,	0,	2.51013	4.03075	21.3359	1.30521	0.314357	4.05292
TU26159	+	Chr05	6321093	6321589	158,74,	0,422,	0.778309	2.57797	0	0.995015	1.30704	0
TU26191	-	Chr05	6795899	6797976	331,116,	0,1961,	0.272747	0	1.69972	0	0	0
TU26240	-	Chr05	7089148	7090986	13,515,	0,1323,	1.01546	1.47563	0.490331	0	0	0
TU26242	-	Chr05	7109245	7110486	139,1016,	0,225,	0.969201	1.40947	1.12355	0.06562	0	0.13803
TU26249	-	Chr05	7111138	7117537	4011,215,	0,6184,	1.9634	1.40876	1.09605	0.044494	0.019882	0.126506
TU26317	-	Chr05	7153423	7156544	351,911,71,135,195,65,72,	0,753,2103,2256,2510,2867,3049,	2.92173	3.87483	40.7081	1.33744	1.07941	9.61011
TU26250	-	Chr05	7195013	7195519	310,155,	0,351,	2.4461	3.88607	0	0	0.178652	0
TU26303	-	Chr05	7195588	7197435	398,96,1170,	0,479,677,	5.49047	2.84599	0.113409	0.451674	0.918848	0.00564
TU26312	-	Chr05	7195588	7197435	575,1170,	0,677,	4.83584	2.87009	0.116745	0.281483	0.206021	0
TU26289	+	Chr05	7682148	7682363	215,	0,	0.051551	0.401639	2.93643	0	0	0
TU26326	+	Chr05	8200499	8201073	574,	0,	2.43215	4.41917	3.62232	0.609297	0.594316	0.158949
TU26365	-	Chr05	8437508	8442994	5486,	0,	2.27917	2.41612	0.039779	0.147539	0.149159	0
TU26338	-	Chr05	8491560	8492109	549,	0,	0.51144	0.45221	24.7463	0	0	1.86246
TU26378	-	Chr05	8800233	8826062	432,2661,1076,51,460,4513,	0,13500,16264,17582,17825,21316,	0	0.174051	3.55956	0	0.034944	0.066337
TU26377	-	Chr05	8803572	8826062	12822,1076,51,460,4513,	0,12925,14243,14486,17977,	0.47394	1.30376	0	0.019538	0.023604	0.024634
TU26347	-	Chr05	8826438	8832009	5178,258,	0,5313,	1.293	4.25491	5.78578	0.057898	0.10773	0.09976
TU26352	+	Chr05	8840634	8843118	310,741,	0,1743,	2.05508	1.95742	0.147559	0.188748	0.304999	0
TU26366	-	Chr05	9745526	9747000	1054,266,	0,1208,	0	0.097013	1.25976	0	0	0
TU26382	-	Chr05	9768498	9775772	6848,246,	0,7028,	11.8325	14.6791	2.52939	0.672341	1.04413	0.255417
TU26383	-	Chr05	9768498	9775772	6839,246,	0,7028,	2.6194	0	0	0.671364	0.373211	0
TU26379	+	Chr05	9905989	9906774	108,578,	0,207,	0.65569	0.698767	0.984873	2.69079	3.73516	1.95717
TU26437	-	Chr05	9953986	9958137	2149,712,	0,3439,	1.0777	2.30619	1.41505	0.62819	0.817521	0.570241
TU26438	-	Chr05	9953986	9958137	2476,107,712,	0,2671,3439,	4.57286	1.05309	0.266921	0.459333	0.234895	0
TU26440	-	Chr05	9953986	9958137	2149,1480,	0,2671,	2.53553	3.2544	1.76346	0.248668	0.352196	0.367487
TU26441	-	Chr05	9953986	9958137	2149,107,712,	0,2671,3439,	0.620737	1.11944	0.819686	0.127887	0.640306	0.207158
TU26443	-	Chr05	9953986	9958137	2476,1480,	0,2671,	2.66552	2.19381	0.335616	0.966408	0.389963	0.083567
TU26439	-	Chr05	9956575	9958137	189,712,	0,850,	2.56409	3.96461	0.764283	0.054526	0.091259	0.071068
TU26380	-	Chr05	9988531	9989703	1172,	0,	0.211597	0.179175	2.52334	0	0	0.079759
TU26381	-	Chr05	9999059	10002746	1056,103,1059,	0,2174,2628,	6.40267	10.2789	113.571	0.255759	0.346486	1.87632
TU26421	+	Chr05	10589869	10627864	212,51,	0,37944,	0	0	1.9351	0	0	0
TU26431	+	Chr05	10728430	10729119	689,	0,	2.18706	2.45533	0.805272	0	0	0
TU26429	-	Chr05	10846249	10846630	381,	0,	4.09811	7.21407	2.50776	0	0.1484	0
TU26444	+	Chr05	11095580	11123944	251,12,	0,28352,	0	1.37398	0	0	0	0
TU26446	+	Chr05	11095580	11095903	323,	0,	2.05884	1.1476	2.64892	0	0	0
TU26497	+	Chr05	11240016	11248621	334,92,132,78,72,104,88,342,253,	0,593,1465,1895,2131,2314,2924,7021,8352,	0.677063	1.26208	2.94181	1.51713	0.90703	1.1316
TU26498	+	Chr05	11240016	11248621	685,132,78,72,104,126,88,342,253,	0,1465,1895,2131,2314,2586,2924,7021,8352,	1.22785	0.280251	4.85445	0.564102	1.49675	2.46342
TU26501	+	Chr05	11240016	11248621	685,132,78,72,104,88,253,	0,1465,1895,2131,2314,2924,8352,	0	0	2.72658	0.178734	0.325551	0.954548
TU26500	+	Chr05	11242880	11248621	4499,253,	0,5488,	1.90085	1.63676	3.8095	0.146946	0.187002	0.315104
TU26523	-	Chr05	11575979	11580281	1137,89,545,	0,3494,3757,	0.413533	0.074692	0.241966	2.15324	2.72174	1.06597
TU26525	-	Chr05	11575979	11580281	3583,545,	0,3757,	4.29811	4.8658	4.5524	0.822424	1.10651	0.410731
TU26462	-	Chr05	11597772	11598702	930,	0,	2.27876	2.25958	4.52641	0.290211	0.0574	0.190356
TU26570	+	Chr05	11719633	11741049	427,11849,	0,9567,	1.43087	3.822	0.20614	0.024224	0.029564	0
TU26545	+	Chr05	11721984	11727029	5045,	0,	2.26026	4.77773	0.440865	0	0.016592	0
TU26508	-	Chr05	12117359	12121836	2598,1794,	0,2683,	0.554404	4.73938	6.92741	0.14247	1.10978	0.799448
TU26509	-	Chr05	12117359	12121836	588,1842,1794,	0,756,2683,	3.47958	0	3.04217	0.260646	0	0.612139
TU26510	-	Chr05	12117359	12121836	588,1842,1525,128,	0,756,2683,4349,	0	0	1.32801	0	0	0
TU26504	+	Chr05	12907466	12919725	134,69,	0,12190,	0	0	1.51931	0	0	0
TU26527	-	Chr05	12956015	12991822	109,307,	0,35500,	0.230905	0	1.49827	0	0	0
TU26524	+	Chr05	12961087	12993041	163,113,	0,31841,	0	0	1.53177	0	0	0
TU26537	-	Chr05	14447968	14531106	83,117,	0,83021,	0	1.39587	0	0	0	0
TU26626	-	Chr05	15087199	15095865	70,181,	0,8485,	0	0.707615	1.16299	0	0	0
TU26571	+	Chr05	15680393	15682755	2362,	0,	0.034997	0	2.21313	0	0	0.091214
TU26584	+	Chr05	15949727	15950017	76,130,	0,160,	0.385589	1.69104	0	0	0	0
TU26694	-	Chr05	16224476	16233923	423,541,	0,8906,	0.507321	1.39404	0.421431	0	0	0.25504
TU26700	-	Chr05	16229191	16231012	157,562,	0,1259,	2.27501	2.2901	1.6251	0	0	0.116653
TU26687	-	Chr05	16231184	16232410	1086,48,	0,1178,	2.01613	2.98944	0.765108	0.106375	0.242333	0.05279
TU26686	-	Chr05	16234250	16264189	413,1283,617,1338,846,	0,441,16082,17435,29093,	1.65969	1.12749	0.723215	0	0.10724	0.130613
TU26685	-	Chr05	16258843	16278003	4082,203,83,	0,4174,19077,	3.63311	3.73124	0	0.182788	0.150897	0.16583
TU26701	-	Chr05	16265016	16267208	2192,	0,	4.12427	4.34099	7.65155	0.344045	0.322641	0.293256
TU26819	+	Chr05	16310825	16588540	64,2694,746,	0,259235,276969,	24.3774	23.311	9.92012	0	0.385495	0
TU26853	+	Chr05	16385646	16531888	56,255,	0,145987,	0.933231	3.60769	0.344842	0	0	0.167735
TU26855	+	Chr05	16402942	16531888	49,272,	0,128674,	1.06177	0	0.082907	0	0	0
TU26858	+	Chr05	16477016	16531888	25,250,23,204,	0,49009,50204,54668,	0.430265	1.03809	0.2658	0	0	0
TU26872	+	Chr05	16526842	16530565	123,80,	0,3643,	1.52875	0.867682	0.96593	0	0	0
TU26861	+	Chr05	16531494	16531888	394,	0,	5.39614	4.47811	2.75524	0	0	0.08129
TU26811	+	Chr05	16568632	16586086	524,213,945,	0,1075,16509,	33.9529	38.6122	15.4982	0.480352	0.65352	1.15128
TU26813	+	Chr05	16570033	16588540	706,88,833,	0,15562,17674,	0.909357	1.55675	0.333502	0	0	0
TU26817	+	Chr05	16570033	16588540	2721,746,	0,17761,	15.4101	20.2565	9.84139	0.525968	0	1.65416
TU27049	+	Chr05	16592065	16596388	437,1019,653,	0,1364,3670,	2.0522	2.00361	2.46994	0.152613	0.005557	0.101074
TU27030	+	Chr05	16592694	16663087	3575,643,570,	0,63270,69823,	9.82405	5.18427	6.25612	0	0.248787	1.02546
TU27034	+	Chr05	16592694	16596388	1754,653,	0,3041,	1.20431	0.286006	1.97445	0	0.035813	0.197563
TU27039	+	Chr05	16592694	16596388	247,1791,	0,1903,	0.768791	2.13301	1.79031	0	0	0.352007
TU27040	+	Chr05	16592694	16596388	756,1283,	0,2411,	1.13109	0.399088	2.17162	0.103828	0	0.196737
TU27046	+	Chr05	16592694	16597179	1754,118,592,	0,3041,3893,	5.45312	1.87421	4.51795	0	0.082258	0.546954
TU27048	+	Chr05	16592694	16606076	1754,118,345,7638,	0,3041,3893,5744,	0	6.43119	0	0.021543	0	0
TU27051	+	Chr05	16592694	16606076	1754,118,78,7813,	0,3041,3893,5569,	0	2.0901	0	0	0	0
TU27032	+	Chr05	16597299	16606076	1394,5268,	0,3509,	0	0	1.47507	0	0	0.001261
TU27035	+	Chr05	16597299	16606076	3418,4623,	0,4154,	5.56729	6.10152	6.27022	0	0.28478	0.558217
TU27036	+	Chr05	16597299	16606076	853,6910,	0,1867,	1.40105	1.26841	2.77881	0	0	0.490968
TU27044	+	Chr05	16597299	16606076	8777,	0,	6.63852	0.61727	1.31824	0.172097	0.065261	0.271971
TU27061	+	Chr05	16612176	16613426	1250,	0,	3.38488	4.8063	5.28999	0	0.071007	0.076831
TU27065	+	Chr05	16627366	16628065	699,	0,	2.67705	4.73302	6.78894	0	0.342078	0.091596
TU27098	+	Chr05	16632803	16638745	2825,3045,	0,2897,	3.16918	0.414005	6.95154	0.087171	1.36022	2.0352
TU27100	+	Chr05	16632803	16638745	1119,4681,	0,1261,	0	4.09978	1.52613	0.812877	0	0.027203
TU27120	+	Chr05	16639000	16639990	990,	0,	2.39535	5.04169	9.76046	0.453786	0.140067	0.337914
TU27038	+	Chr05	16640970	16658139	11924,2516,613,	0,13580,16556,	2.15626	3.5714	6.65931	0.040683	0.081147	0.636458
TU27042	+	Chr05	16640970	16663087	980,3788,	0,18329,	0.500013	0.926286	4.18738	0	0	0.380296
TU27123	+	Chr05	16653161	16653644	483,	0,	0.309785	1.51357	3.42282	0	0	0.530897
TU27129	+	Chr05	16663482	16664972	1490,	0,	0.474308	0.933204	4.89095	0	0.023764	0.473622
TU27131	+	Chr05	16663482	16676205	1067,175,	0,12548,	0.897473	0.605198	3.7568	0	0.115183	0.235994
TU27171	+	Chr05	16670117	16682086	867,71,1941,	0,5191,10028,	0.019078	0.116122	3.15516	0	0	0.159777
TU27191	+	Chr05	16672545	16678744	97,142,	0,6057,	1.29655	1.61151	7.06213	0	0	0.905469
TU27174	+	Chr05	16677492	16682086	374,2104,	0,2490,	0.299018	1.21864	2.59111	0.027784	0.018355	0.397395
TU27240	+	Chr05	16692964	16732504	2073,3297,	0,36243,	0.256872	0.662591	6.96073	0	0	0.164655
TU27239	+	Chr05	16696655	16732504	1928,21,193,	0,22427,35656,	0.296768	0.559356	5.77458	0	0	0.118815
TU27238	+	Chr05	16701096	16732504	181,3316,	0,28092,	0	0	7.81062	0	0	0
TU27244	+	Chr05	16722698	16904279	1115,129,	0,181452,	0.418747	0.58569	10.8459	0	0	0.33351
TU27248	+	Chr05	16774853	16775516	341,138,	0,525,	0	0.77437	2.43011	0	0	0
TU27256	+	Chr05	16776019	16776834	162,191,	0,624,	0.480126	1.27455	2.59147	0	0	0
TU27266	+	Chr05	16781075	16897669	143,214,	0,116380,	0	0.641816	3.40267	0	0	0
TU27283	+	Chr05	16838744	16897170	166,2183,	0,56243,	0.048953	0.16647	3.24765	0	0	0
TU27288	+	Chr05	16901179	16903139	144,532,	0,1428,	0	1.25853	20.4475	0	0	0
TU26595	+	Chr05	16905259	16907075	109,1060,	0,756,	0	0	3.57309	0	0	0.154451
TU26638	+	Chr05	16908541	16914697	147,43,700,	0,1251,5456,	0	0.418421	7.43429	0	0	0.301784
TU26601	+	Chr05	16922033	16922266	233,	0,	0	0	2.24128	0	0	0
TU26646	+	Chr05	16928245	16930837	1893,62,	0,2530,	0	0.433167	5.7788	0	0	0.220897
TU26642	+	Chr05	16934329	16936254	1203,171,	0,1754,	0.196622	0.097107	9.65212	0	0	0.067928
TU26644	+	Chr05	16934329	16946805	546,657,	0,11819,	0	0.378098	5.22222	0	0	0.093791
TU26653	+	Chr05	16936464	16937424	66,338,	0,622,	0	0	5.7864	0	0	0
TU26665	+	Chr05	16939042	16945914	174,99,74,1372,	0,1459,4688,5500,	0	0.290273	5.07265	0	0	0.038922
TU26615	+	Chr05	16962567	16964528	103,204,	0,1757,	0	0	2.75419	0	0	0
TU26611	+	Chr05	16981346	16983272	1926,	0,	0.729881	2.87684	0.20529	0	0.038869	0
TU26656	-	Chr05	17044293	17049312	2166,1746,	0,3273,	5.55807	9.41213	2.20338	1.88157	3.71092	2.68483
TU26660	-	Chr05	17044293	17049312	2183,2777,	0,2242,	9.95666	0	0	0	0.000102	0
TU26661	-	Chr05	17044293	17049312	2170,2809,	0,2210,	0	0	4.62547	0	0	0
TU26663	-	Chr05	17044293	17049312	2170,2811,	0,2208,	4.37661	7.70795	0.478904	0.850575	0	0.548234
TU26664	-	Chr05	17044293	17049312	2191,2777,	0,2242,	0.000261	0	7e-05	0	3.74554	0
TU26635	+	Chr05	17066935	17068674	73,569,	0,1170,	1.98282	1.15695	0	0.1332	0	0.149593
TU26647	+	Chr05	17068727	17070890	1362,768,	0,1395,	1.43963	1.1522	0.482974	0.189864	0.035443	0
TU26634	+	Chr05	17506718	17519716	1046,15,	0,12983,	0.228511	0.4148	1.17717	0	0	0
TU26633	+	Chr05	17799478	17799713	235,	0,	0	0.703597	2.88356	0	0	0
TU26652	+	Chr05	18461628	18462029	319,26,	0,375,	1.11905	0	0.248584	0.218845	0	0
TU26654	+	Chr05	18981019	18981385	366,	0,	0.842867	0.770812	1.98128	0	0	0
TU26659	+	Chr05	19058442	19058779	337,	0,	1.14973	1.93926	2.27244	0	0	0
TU26716	-	Chr05	19152653	19153687	795,206,	0,828,	0.154552	0.66072	1.28795	0	0.091826	0
TU26722	-	Chr05	19154004	19155968	1964,	0,	0.316495	1.31578	2.20712	0.038885	0.001769	0
TU26693	-	Chr05	19513399	19513773	168,42,	0,332,	0	0	1.00851	0	0	0
TU26702	+	Chr05	19917294	19926419	59,474,	0,8651,	0.590043	0.795332	1.94293	0	0	0
TU26747	-	Chr05	19922284	19924145	87,613,	0,1248,	0	0	55.6319	0	0	0
TU26748	-	Chr05	19922939	19924145	1206,	0,	3.43141	5.76236	11.2229	0.132406	0.166053	1.29034
TU26714	+	Chr05	19966776	19969300	25,386,344,	0,1384,2180,	2.11821	3.15114	0	0.533727	2.32278	0.114907
TU26754	+	Chr05	21078944	21150434	199,662,	0,70828,	0.697811	0.407731	1.06267	0	0	0
TU26739	-	Chr05	21438014	21438290	276,	0,	2.46299	1.73501	3.24589	0	0	0
TU26751	+	Chr05	22200269	22200990	721,	0,	1.08823	1.8879	9.55322	1.24498	0.323789	1.08442
TU26845	+	Chr05	22232653	22235444	2791,	0,	3.29952	4.45179	1.15366	0.212372	0.145655	0.118256
TU26892	-	Chr05	22243988	22244451	463,	0,	0.767024	1.99329	3.48806	0	0	0
TU26889	+	Chr05	22248846	22251497	2651,	0,	3.18581	3.73087	0.980998	0.899805	1.28444	0.479046
TU26786	-	Chr05	23415812	23419442	3630,	0,	0.244899	0.699735	2.15438	0.016774	0.05462	0.115575
TU26785	-	Chr05	23457322	23457535	213,	0,	2.98767	3.69476	6.39492	0	0	0
TU26823	-	Chr05	24334128	24334482	354,	0,	0.307874	0.939698	1.27501	0	0	2.13057
TU26830	-	Chr05	24684968	24716695	988,7963,	0,23764,	2.49427	4.40347	1.17795	0.064636	0.117758	0
TU26837	-	Chr05	24690016	24704559	425,917,	0,13626,	1.84277	2.0748	0.606354	0	0.09509	0
TU26844	-	Chr05	24697164	24700460	1405,1603,	0,1693,	1.83327	2.54666	1.09654	0.028851	0	0
TU26828	+	Chr05	24766511	24766806	295,	0,	2.66754	2.62949	0.859866	0	0.525733	0.219207
TU26842	+	Chr05	25263410	25263634	224,	0,	0.834969	1.26821	3.0683	0	0	0
TU26849	+	Chr05	25281788	25282461	673,	0,	2.30974	3.15525	1.54773	0.072212	0	0.115589
TU26859	-	Chr05	25341887	25342095	208,	0,	0.071048	0	2.12158	0	0	0
TU26868	-	Chr05	25549006	25549317	311,	0,	0	0.738325	2.50515	0	0	0
TU26912	-	Chr05	25897825	25898139	103,122,	0,192,	0	1.15137	0	0	0	0
TU26926	-	Chr05	26511922	26514603	662,509,	0,2172,	1.5211	3.093	0.161604	0.460226	0.577788	0
TU26922	-	Chr05	26832478	26834593	2115,	0,	0.393903	0.293688	28.4187	0	0.016129	2.04035
TU26953	+	Chr05	27311986	27312352	366,	0,	2.76455	2.0269	0.730465	0	0.126865	0
TU26955	-	Chr05	27341102	27341781	679,	0,	0.531864	1.09039	3.31715	0	0	0
TU26962	-	Chr05	27348239	27348929	690,	0,	0.172008	0.091728	2.64164	0	0	0.399929
TU27188	+	Chr05	27371844	27400141	1087,136,99,60,158,113,320,676,251,168,231,97,3641,1458,	0,1176,3163,5644,6299,9323,18645,19059,19832,20172,20410,20772,20963,26839,	3.09821	2.34631	4.19167	0.808482	0.901881	1.26875
TU27189	+	Chr05	27371844	27400141	1074,136,2225,60,158,9642,676,508,272,97,7334,	0,1176,3160,5644,6299,9323,19059,19832,20410,20772,20963,	16.3019	18.7982	17.5806	1.06843	1.36201	1.08896
TU27190	+	Chr05	27371844	27400141	1087,136,99,165,60,158,113,8371,2970,	0,1176,3163,5220,5644,6299,9323,9526,25327,	2.52491	3.97047	5.06299	0.031727	0.058555	0
TU27192	+	Chr05	27371844	27400141	1087,136,99,60,158,113,320,676,208,168,272,97,7334,	0,1176,3163,5644,6299,9323,18645,19059,19832,20172,20410,20772,20963,	4.70148	4.11473	6.75367	1.91914	2.10949	0.759387
TU27193	+	Chr05	27371844	27400141	1087,136,99,60,158,113,320,676,208,168,104,34,97,487,601,1458,	0,1176,3163,5644,6299,9323,18645,19059,19832,20172,20410,20607,20772,20963,24003,26839,	0.071732	0.129534	1.09705	0.182998	0.276811	0.025221
TU27196	+	Chr05	27371844	27378878	1087,136,99,165,60,735,	0,1176,3163,5220,5644,6299,	7.77829	6.6733	8.95605	1.61685	2.29541	2.90786
TU27200	+	Chr05	27371844	27378878	1087,136,99,60,735,	0,1176,3163,5644,6299,	4.36638	4.71697	5.23377	0.543473	1.9627	1.88204
TU26985	+	Chr05	27794133	27795715	73,138,	0,1444,	0	1.15102	0	0	0	0
TU27058	+	Chr05	28193567	28193796	229,	0,	2.30905	1.02413	0	0	0	0
TU27062	-	Chr05	28289958	28295186	4637,159,	0,5069,	0.047279	0.279591	1.9388	0	0	0.188232
TU27086	+	Chr05	28470674	28471364	328,290,	0,400,	0	0	1.40401	0	0	0
TU27128	+	Chr05	28837930	28839968	2038,	0,	0.767202	2.17441	0.056898	0.585652	1.15839	0
TU27159	+	Chr05	29279995	29281052	289,613,	0,444,	2.94596	3.08689	0	1.02049	0.680762	0
TU27180	-	Chr05	29791053	29798350	191,234,	0,7063,	0	0.666114	1.44949	0	0	0
TU27219	+	Chr05	30079006	30080262	865,126,	0,1130,	0.324805	0	1.22578	0	0	0
TU27243	+	Chr05	30817513	30818040	527,	0,	0.567843	0.725252	2.19349	0	0	0
TU27339	-	Chr05	31281873	31282474	601,	0,	0.362686	0.372265	4.80215	0	0	0.230109
TU27403	+	Chr05	31752267	31752899	321,226,	0,406,	0	0	1.53178	0	0	0.340027
TU27435	+	Chr05	31853326	31854216	890,	0,	1.3709	1.90963	1.7915	1.44574	1.84268	1.20138
TU27518	-	Chr05	32246190	32246794	604,	0,	0	0	0.515504	1.25029	2.10552	1.14218
TU27509	+	Chr05	32246383	32246886	503,	0,	3.59716	2.38589	0.612106	0.617346	0.489084	0
TU27543	-	Chr05	32410529	32411171	642,	0,	1.21567	3.2694	1.34149	0.256835	0.194343	0
TU27641	-	Chr05	32596769	32600768	853,96,96,87,240,	0,974,2040,3540,3759,	2.43351	2.85991	0.927181	0.982954	1.12833	0
TU27610	+	Chr05	32600010	32600817	35,541,	0,266,	1.39042	2.21186	1.64171	0	0.363028	0.389045
TU27657	+	Chr05	32757461	32757876	415,	0,	0.576428	3.04433	0.262926	0.130349	0	0
TU27706	+	Chr05	32875703	32876328	47,334,	0,291,	1.60482	1.00446	0	0	0	0
TU27744	-	Chr05	32938439	32939817	192,1106,	0,272,	0.122612	0.233348	0.211865	0.018277	1.03351	0.450844
TU27807	+	Chr05	33263971	33265140	476,607,	0,562,	0.683974	0.54455	1.97563	0.129547	0.175579	1.91752
TU27810	-	Chr05	33266052	33267558	1506,	0,	3.75489	6.2519	5.94463	4.41254	5.05536	2.04789
TU27882	+	Chr05	33279915	33281195	1280,	0,	4.74907	5.12181	3.1566	0.809977	0.633464	0.481443
TU27821	+	Chr05	33341299	33341742	443,	0,	0	0	3.19836	0	0	0.570161
TU27876	+	Chr05	33586496	33586778	282,	0,	0.368465	2.44102	1.13509	0	0.240821	0.703829
TU27897	-	Chr05	33720813	33721423	610,	0,	0.896366	2.46606	0.683821	0.004742	0.126865	0
TU27910	+	Chr05	33818476	33819282	806,	0,	3.75178	4.3427	2.22898	0.579273	0.420112	0.485754
TU28022	+	Chr05	33990338	33995710	1129,109,1142,1350,	0,2511,2746,4022,	1.60585	1.2574	3.40125	0.331198	1.25305	0.549433
TU28024	+	Chr05	33990338	33992455	642,1162,	0,955,	3.33262	1.69271	3.73451	0.112553	0.462319	0.048147
TU28025	+	Chr05	33990338	33995710	642,174,109,1142,1350,	0,955,2511,2746,4022,	1.48951	1.63344	1.89715	0.279385	0.249524	0.598932
TU28027	+	Chr05	33990338	33992455	140,1162,	0,955,	0	0.341396	2.28173	0.241155	0	0.08831
TU28029	+	Chr05	33990338	33995710	1129,2861,	0,2511,	1.28323	1.46689	2.26592	0.024758	0.072977	0.75736
TU28030	+	Chr05	33990338	33995710	140,65,174,109,1142,1398,	0,577,955,2511,2746,3974,	0.017376	0	1.14688	0	0	0.072852
TU28026	+	Chr05	33992743	33995710	215,2626,	0,341,	1.16142	0.592842	1.88455	0.054232	0.128743	0.17459
TU28028	+	Chr05	33992743	33995710	1483,1398,	0,1569,	0.274046	0.85306	1.80491	0.145035	0.075346	0.037371
TU27983	-	Chr05	34103267	34106631	3364,	0,	3.85167	2.2948	0.024776	0.562303	0.868449	0
TU28003	-	Chr05	34154733	34155825	1092,	0,	0	0	4.16315	0	0	0.400454
TU28047	+	Chr05	34344284	34344788	504,	0,	0.707376	0.406919	3.3513	0	0.500124	0.788889
TU28084	+	Chr05	34396870	34399292	964,1200,	0,1222,	0.065302	0.153268	1.65186	0.035424	0	0.358253
TU28377	-	Chr05	35347334	35348053	719,	0,	1.24862	1.10479	2.39958	0.100181	0	0
TU28705	+	Chr05	36509029	36512965	750,1704,	0,2232,	8.52787	9.04903	1.27124	3.83924	3.63699	0.499761
TU28731	-	Chr05	36568601	36570694	245,567,	0,1526,	0	0	1.83296	0.669233	0.213707	1.80967
TU28730	-	Chr05	36568979	36570694	1715,	0,	1.30599	0.526686	43.1077	0.087284	0.206396	1.45463
TU28855	+	Chr05	36985191	36985757	275,83,	0,483,	11.5324	11.663	6.82681	2.82975	4.26863	2.1944
TU29048	+	Chr05	37559713	37560645	97,224,	0,708,	2.08174	2.87964	0.673568	0.318115	0.270604	0
TU29103	-	Chr05	37755931	37757090	897,29,	0,1130,	2.05421	2.12575	0	0.318955	0.109496	0
TU29120	-	Chr05	37851192	37852100	507,31,	0,877,	0.356229	1.65978	0.213292	0.318313	0.975786	0
TU29241	-	Chr05	38204011	38205622	1611,	0,	2.07533	2.0502	1.15973	1.01933	1.29114	0.248907
TU29609	-	Chr05	39248325	39248552	227,	0,	2.92954	0.293951	0.48068	0	0	0
TU29754	-	Chr05	39656918	39661092	327,68,	0,4106,	2.41194	2.23706	2.55648	1.03481	0.714102	2.01235
TU29771	-	Chr05	39715484	39715857	373,	0,	2160.88	1864.98	1527.71	2.37627	2.54473	2.49666
TU29824	+	Chr05	39723339	39727156	349,70,80,107,1616,	0,469,1065,1368,2201,	2.16291	1.94433	0.279155	0.569821	1.18066	0
TU29825	+	Chr05	39723339	39727156	349,676,107,1616,	0,469,1368,2201,	4.88408	5.56143	0.640382	1.47672	1.05147	0.207919
TU29826	+	Chr05	39723339	39727156	349,78,107,1616,	0,469,1368,2201,	2.02792	1.15921	0	0	0.899631	0
TU29827	+	Chr05	39723339	39727156	349,78,80,107,169,784,	0,469,1065,1368,2201,3033,	0.411303	1.15298	0	0.559554	1.00712	0
TU29829	+	Chr05	39723339	39725006	349,1198,	0,469,	2.89017	2.82828	0.205566	0.043359	0.187884	0.113031
TU29893	-	Chr05	40123087	40128900	770,83,81,84,159,94,87,139,154,	0,1508,1670,1958,2989,3464,4365,5025,5659,	1.98923	1.8481	0.29484	1.5997	2.28586	0.576168
TU29894	-	Chr05	40124128	40128900	550,81,84,159,94,87,139,154,	0,629,917,1948,2423,3324,3984,4618,	0.57029	1.29521	0	0.043874	0.093951	0
TU29896	-	Chr05	40124128	40125426	710,381,	0,917,	0.694707	1.1344	0.056101	0.016719	0.005543	0.000741
TU30123	-	Chr05	40605973	40618769	11,210,	0,12586,	2.57026	1.26545	0.298788	0	0	0
TU30044	-	Chr05	40709539	40710562	489,320,	0,703,	0.07478	0	1.57471	0.075806	0	1.33473
TU30158	-	Chr05	41050588	41051198	610,	0,	1.81999	1.54431	4.262	0	0.107706	0
TU30375	+	Chr05	41671807	41674607	262,1440,	0,1360,	0.369557	1.23265	4.20733	0.194268	0.113765	1.57544
TU30432	-	Chr05	41868096	41868994	898,	0,	0	0	3.98152	0.073447	0	0.082349
TU30530	+	Chr05	42171041	42171974	933,	0,	2.9144	1.80427	1.65586	1.17168	0.731947	1.05028
TU30652	-	Chr06	289871	290566	695,	0,	2.86455	2.38825	0.716054	1.99581	3.12232	0.323814
TU30654	+	Chr06	335532	341795	6263,	0,	2.9114	4.01677	0.874253	0.221104	0.244807	0.060417
TU30708	+	Chr06	470975	471312	337,	0,	3.93292	1.73107	13.6072	0.395718	1.20161	1.04588
TU30768	-	Chr06	556655	560220	191,103,63,827,	0,2208,2510,2738,	0	0	2.1778	0	0	1.54965
TU30769	-	Chr06	556655	560220	1975,103,1055,	0,2208,2510,	0	0.246807	2.21255	0	0	1.22399
TU30771	-	Chr06	556655	560220	2311,63,827,	0,2510,2738,	0.160573	0	3.37009	0.070851	0.022696	0.138091
TU30856	+	Chr06	896534	897531	300,43,474,	0,390,523,	0	0	1.84808	0	0	0.635555
TU30891	-	Chr06	1051283	1051939	418,29,	0,627,	1.25319	1.10311	0.956598	0.309339	0.457903	0.144667
TU30948	+	Chr06	1174472	1176040	314,410,257,	0,452,1311,	0.085358	1.18033	0.08455	0.260674	0.448204	0
TU31183	+	Chr06	2005131	2006165	1034,	0,	6.42693	6.38447	2.37493	1.30455	1.01512	0.461926
TU31226	+	Chr06	2206166	2208743	261,266,	0,2311,	0.155105	0	6.06246	0	0.077319	0.127566
TU31235	+	Chr06	2262084	2262415	331,	0,	2.56158	2.4947	0	1.54951	0.71285	0
[truncated: 4,125 more rows]
